# Supplementary material for: Gut Anaerobes Capable of Chicken Caecum Colonisation
Source: MDPI journal article supplement (doi:10.3390/microorganisms7120597), 2019-11-21

Figure S2. *Salmonella* counts in the caecum of 12-day-old chicks inoculated with different anaerobes on day 1 of life and challenged with *S. Enteritidis* on day 8. Light blue columns, *Salmonella* counts in the chicks which were successfully colonised. Dark blue columns, *Salmonella* counts in the chicks which were inoculated but tested isolate did not colonise chicken caecum. Red columns highlight *Salmonella* counts in non-inoculated control chicks included in each experiment batch (except for the experiment with L10 and C10 mixtures in which no non-inoculated control chicks were included).

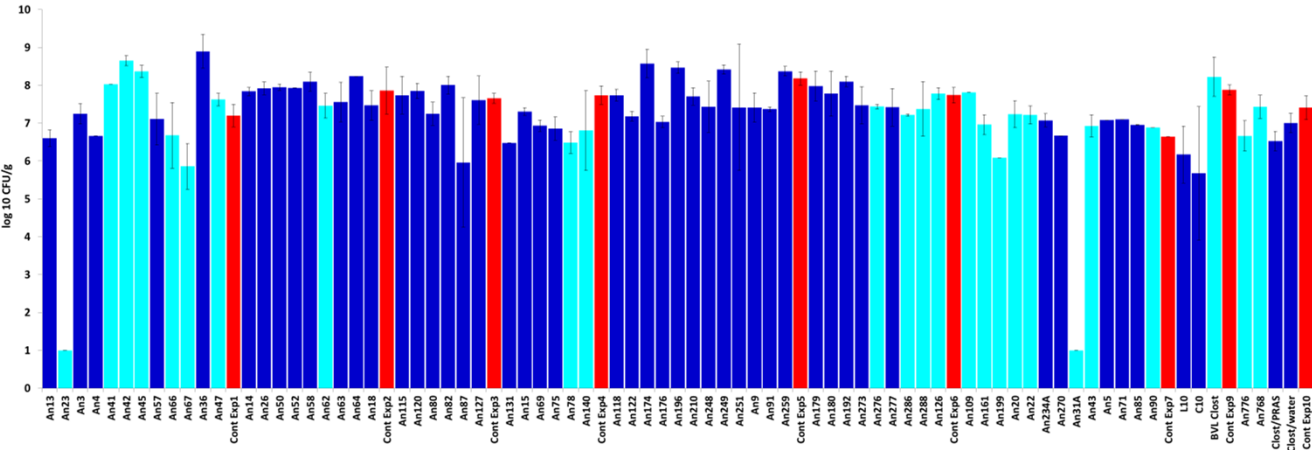

Supplement: s1 [file s1]
