# Supplementary material for: Gut Anaerobes Capable of Chicken Caecum Colonisation
Source: Microorganisms. 2019 Nov 21;7(12):597. doi: 10.3390/microorganisms7120597 (PMC6956218; doi:10.3390/microorganisms7120597)
Supplement: Supplementary file 1 [file microorganisms-07-00597-s001.zip]

Archive with 6 entries (6 files):
- Table S3.xlsx
- Table S4.xlsx
- Figure S1.pdf
- Figure S2.pdf
- Table S1.xlsx
- Table S2.xlsx
