# Supplementary material for: Gut Anaerobes Capable of Chicken Caecum Colonisation
Source: Microorganisms. 2019 Nov 21;7(12):597. doi: 10.3390/microorganisms7120597 (PMC6956218; doi:10.3390/microorganisms7120597)
Supplement: Supplementary file 1 [file microorganisms-07-00597-s001.zip › Table S1.xlsx]

## Sheet: Table S1
Table S1. List of strains used in this study.
Taxon	Individually tested	Tested as a part of mixture
[Eubacterium] contortum An118	Yes	C10, Clost/PRAS, Clost/water
Anaerotruncus colihominis An174	Yes	C10, Clost/PRAS, Clost/water
Butyricicoccus pullicaecorum An179	Yes	C10, Clost/PRAS, Clost/water
[Clostridium] lactatifermentans An75	Yes	C10, Clost/PRAS, Clost/water
Pseudoflavonifractor capillosus An85	Yes	C10, Clost/PRAS, Clost/water
Blautia producta An81	No	C10, Clost/PRAS, Clost/water
Oscillibacter valericigenes An411	No	Clost/PRAS, Clost/water
Bacteroides ovatus An161	Yes	G-Clost
Megasphaera elsdenii An286	Yes	G-Clost
Megamonas hypermegale An288	Yes	G-Clost
Bacteroides dorei An41	Yes	G-Clost
Parabacteroides johnsonii An42	Yes	G-Clost
Alistipes senegalensis An66	Yes	G-Clost
Desulfovibrio piger An401	No	G-Clost
Veillonella magna An354	No	G-Clost
Lactobacillus gallinarum An115	Yes	L10
Enterococcus cecorum An69	Yes	L10
Lactobacillus reuteri An71	Yes	L10
Bacillus licheniformis An441	No	L10
Lactobacillus coleohominis An526	No	L10
Lactobacillus salivarius An63	Yes	L10, BVL-Clost
Lactobacillus aviarius An347	No	L10, BVL-Clost
Bacteroides xylanisolvens An109	Yes	No
Gemmiger formicilis An120	Yes	No
Faecalibacterium prausnitzii An122	Yes	No
Bacteroides xylanisolvens An126	Yes	No
Parabacteroides johnsonii An127	Yes	No
Massiliomicrobiota timonensis An13	Yes	No
[Eubacterium] fissicatena An131	Yes	No
[Clostridium] saccharolyticum An14	Yes	No
Alistipes onderdonkii An140	Yes	No
[Clostridium] spiroforme An15	Yes	No
Pseudoflavonifractor capillosus An176	Yes	No
Enorma timonensis An18	Yes	No
Butyricicoccus pullicaecorum An180	Yes	No
Faecalibacterium prausnitzii An192	Yes	No
[Clostridium] saccharolyticum An196	Yes	No
Parabacteroides distasonis An199	Yes	No
Mediterranea massiliensis An20	Yes	No
Drancourtella massiliensis An210	Yes	No
Barnesiella viscericola An22	Yes	No
Cloacibacillus porcorum An23	Yes	No
Gordonibacter urolithinfaciens An234A	Yes	No
Flavonifractor plautii An248	Yes	No
Blautia schinkii An249	Yes	No
Anaerotruncus colihominis An251	Yes	No
Anaeromassilibacillus senegalensis An259	Yes	No
[Clostridium] spiroforme An26	Yes	No
Olsenella uli An270	Yes	No
Elusimicrobium minutum An273	Yes	No
Desulfovibrio desulfuricans An276	Yes	No
Parabacteroides merdae An277	Yes	No
[Eubacterium] hallii An3	Yes	No
Alistipes senegalensis An31A	Yes	No
Barnesiella viscericola An36	Yes	No
Flavonifractor plautii An4	Yes	No
Bacteroides clarus An43	Yes	No
Odoribacter splanchnicus An45	Yes	No
Mediterranea massiliensis An47	Yes	No
Enorma timonensis An5	Yes	No
Gemmiger formicilis An50	Yes	No
Flavonifractor plautii An52	Yes	No
Drancourtella massiliensis An57	Yes	No
Faecalibacterium prausnitzii An58	Yes	No
Butyricimonas paravirosa An62	Yes	No
[Eubacterium] cylindroides An64	Yes	No
Bacteroides uniformis An67	Yes	No
Bacteroides caecicola An768	Yes	No
Megamonas funiformis An776	Yes	No
Akkermansia muciniphila An78	Yes	No
Massiliomicrobiota timonensis An80	Yes	No
Flavonifractor plautii An82	Yes	No
Gemmiger formicilis An87	Yes	No
Flavonifractor plautii An9	Yes	No
Alistipes onderdonkii An90	Yes	No
Flavonifractor plautii An91	Yes	No
Composition of used mixtures
BVL	L10
Bacteroides dorei An41	Lactobacillus gallinarum An115
Desulfovibrio piger An401	Lactobacillus reuteri An71
Alistipes senegalensis An66	Lactobacillus coleohominis An526
Bacteroides ovatus An161	Lactobacillus salivarius An63
Megamonas hypermegale An288	Lactobacillus aviarius An347
Megasphaera elsdenii An286	Enterococcus cecorum An69
Parabacteroides johnsonii An42	Bacillus licheniformis An441
Veillonella magna An354
Lactobacillus salivarius An63
Lactobacillus aviarius An347
C10	Clost
Pseudoflavonifractor capillosus An85	Pseudoflavonifractor capillosus An85
Anaerotruncus colihominis An174	Anaerotruncus colihominis An174
Butyricicoccus pullicaecorum An179	Butyricicoccus pullicaecorum An179
Blautia producta An81	Blautia producta An81
[Clostridium] lactatifermentans An75	[Clostridium] lactatifermentans An75
[Eubacterium] contortum An118	[Eubacterium] contortum An118
	Oscillibacter valericigenes An411
