# Supplementary material for: Gut Anaerobes Capable of Chicken Caecum Colonisation
Source: Microorganisms. 2019 Nov 21;7(12):597. doi: 10.3390/microorganisms7120597 (PMC6956218; doi:10.3390/microorganisms7120597)
Supplement: Supplementary file 1 [file microorganisms-07-00597-s001.zip › Table S2.xlsx]

## Sheet: Table S2
Table S2. Bacterial strains and numbers of chicks used in different experiments.
Group/Anaerobe	Experiment	Age when sacrificed for microbiota compostion prior Salmonella infection (days)	Age when sacrificed after Salmonella infection for Salmonella counts (days)	number of chicks sacrificed prior Salmonella infection	number of chicks sacrificed after Salmonella infection
Massiliomicrobiota timonensis An13	Exp1	8	12	3	3
Cloacibacillus porcorum An23	Exp1	8	12	3	3
[Eubacterium] hallii An3	Exp1	8	12	3	3
Flavonifractor plautii An4	Exp1	8	12	3	3
Bacteroides dorei An41	Exp1	8	12	3	3
Parabacteroides johnsonii An42	Exp1	8	12	3	3
Odoribacter splanchnicus An45	Exp1	8	12	3	3
Drancourtella massiliensis An57	Exp1	8	12	3	3
Alistipes senegalensis An66	Exp1	8	12	3	3
Bacteroides uniformis An67	Exp1	8	12	3	3
Barnesiella viscericola An36	Exp1	8	12	3	3
Mediterranea massiliensis An47	Exp1	8	12	3	3
Cont Exp 1	Exp1	8	12	6	6
[Clostridium] saccharolyticum An14	Exp2	8	12	3	3
[Clostridium] spiroforme An26	Exp2	8	12	3	3
Gemmiger formicilis An50	Exp2	8	12	3	3
Flavonifractor plautii An52	Exp2	8	12	3	3
Faecalibacterium prausnitzii An58	Exp2	8	12	3	3
Butyricimonas paravirosa An62	Exp2	8	12	3	3
Lactobacillus salivarius An63	Exp2	8	12	3	3
[Eubacterium] cylindroides An64	Exp2	8	12	3	3
Enorma timonensis An18	Exp2	8	12	3	3
Cont Exp 2	Exp2	8	12	3	3
Lactobacillus gallinarum An115	Exp3	8	12	4	4
Gemmiger formicilis An120	Exp3	8	12	4	4
Massiliomicrobiota timonensis An80	Exp3	8	12	4	4
Flavonifractor plautii An82	Exp3	8	12	4	4
Gemmiger formicilis An87	Exp3	8	12	4	4
Parabacteroides johnsonii An127	Exp3	8	12	4	4
Cont Exp 3	Exp3	8	12	4	4
[Eubacterium] fissicatena An131	Exp4	8	12	3	3
[Clostridium] spiroforme An15	Exp4	8	12	3	3
Enterococcus cecorum An69	Exp4	8	12	3	3
[Clostridium] lactatifermentans An75	Exp4	8	12	3	3
Akkermansia muciniphila An78	Exp4	8	12	3	3
Alistipes onderdonkii An140	Exp4	8	12	3	3
Cont Exp 4	Exp4	8	12	3	3
[Eubacterium] contortum An118	Exp5	8	12	3	3
Faecalibacterium prausnitzii An122	Exp5	8	12	3	3
Anaerotruncus colihominis An174	Exp5	8	12	3	3
Pseudoflavonifractor capillosus An176	Exp5	8	12	3	3
[Clostridium] saccharolyticum An196	Exp5	8	12	3	3
Drancourtella massiliensis An210	Exp5	8	12	3	3
Flavonifractor plautii An248	Exp5	8	12	3	3
Blautia schinkii An249	Exp5	8	12	3	3
Anaerotruncus colihominis An251	Exp5	8	12	3	3
Flavonifractor plautii An9	Exp5	8	12	3	3
Flavonifractor plautii An91	Exp5	8	12	3	3
Anaeromassilibacillus senegalensis An259	Exp5	8	12	3	3
Cont Exp 5	Exp5	8	12	3	3
Butyricicoccus pullicaecorum An179	Exp6	8	12	3	3
Butyricicoccus pullicaecorum An180	Exp6	8	12	3	3
Faecalibacterium prausnitzii An192	Exp6	8	12	3	3
Elusimicrobium minutum An273	Exp6	8	12	3	3
Desulfovibrio desulfuricans An276	Exp6	8	12	3	3
Parabacteroides merdae An277	Exp6	8	12	3	3
Megasphaera elsdenii An286	Exp6	8	12	3	3
Megamonas hypermegale An288	Exp6	8	12	3	3
Bacteroides xylanisolvens An126	Exp6	8	12	3	3
Cont Exp 6	Exp6	8	12	3	3
Bacteroides xylanisolvens An109	Exp7	8	12	3	3
Bacteroides ovatus An161	Exp7	8	12	3	3
Parabacteroides distasonis An199	Exp7	8	12	3	3
Mediterranea massiliensis An20	Exp7	8	12	3	3
Barnesiella viscericola An22	Exp7	8	12	3	3
Gordonibacter urolithinfaciens An234A	Exp7	8	12	3	3
Olsenella uli An270	Exp7	8	12	3	3
Alistipes senegalensis An31A	Exp7	8	12	3	3
Bacteroides clarus An43	Exp7	8	12	3	3
Enorma timonensis An5	Exp7	8	12	3	3
Lactobacillus reuteri An71	Exp7	8	12	3	3
Pseudoflavonifractor capillosus An85	Exp7	8	12	3	3
Alistipes onderdonkii An90	Exp7	8	12	3	3
Cont Exp 7	Exp7	8	12	3	3
L10	Exp8	8	12	3	3	Lactobacillus gallinarum An115	Lactobacillus reuteri An71	Lactobacillus coleohominis An526	Lactobacillus salivarius An63	6. Lactobacillus aviarius An347	Enterococcus cecorum An69	Bacillus licheniformis An441
C10	Exp8	8	12	3	3	Pseudoflavonifractor capillosus An85	Anaerotruncus colihominis An174	Butyricicoccus pullicaecorum An179	Blautia producta An81	[Clostridium] lactatifermentans An75	[Eubacterium] contortum An118
BVL/Clostr	Exp9	15	19	4	4	Alistipes senegalensis An66	Bacteroides dorei An41	Bacteroides ovatus An161	Megamonas hypermegale An288	Megasphaera elsdenii An286	Parabacteroides johnsonii An42	Veillonella magna An354	Desulfovibrio piger An401	Lactobacillus salivarius An63	Lactobacillus aviarius An347	Pseudoflavonifractor capillosus An85	Anaerotruncus colihominis An174	Butyricicoccus pullicaecorum An179	Blautia producta An81	[Clostridium] lactatifermentans An75	[Eubacterium] contortum An118	Oscillibacter valericigenes An411
Cont Exp 9	Exp9	15	19	4	4
Bacteroides caecicola An768	Exp10	8	12	5	5
Megamonas funiformis An776	Exp10	8	12	5	5
Clost/PRAS	Exp10	8	12	5	5	Pseudoflavonifractor capillosus An85	Anaerotruncus colihominis An174	Butyricicoccus pullicaecorum An179	Blautia producta An81	[Clostridium] lactatifermentans An75	[Eubacterium] contortum An118	Oscillibacter valericigenes An411
Clost/water	Exp10	8	12	5	5	Pseudoflavonifractor capillosus An85	Anaerotruncus colihominis An174	Butyricicoccus pullicaecorum An179	Blautia producta An81	[Clostridium] lactatifermentans An75	[Eubacterium] contortum An118	Oscillibacter valericigenes An411
Cont Exp 10	Exp10	8	12	5	5
total number of chicks used in this study	542
total number of chicks sacrificed prior Salmonella infection	271
total number of chicks sacrificed after Salmonella infection	271
number of all inoculated i.e. experimental chicks	474
number of experimental chicks sacrificed prior Salmonella infection	237
number of experimental chicks sacrificed after Salmonella infection	237
number of all control, i.e. non-inoculated chicks	68
number of control chicks sacrificed prior Salmonella infection	34
number of control chicks sacrificed after Salmonella infection	34
number of all groups	83
number of inoculated groups	74
number of control groups	9
number of different experiments	10
