# Supplementary material for: Gut Anaerobes Capable of Chicken Caecum Colonisation
Source: Microorganisms. 2019 Nov 21;7(12):597. doi: 10.3390/microorganisms7120597 (PMC6956218; doi:10.3390/microorganisms7120597)
Supplement: Supplementary file 1 [file microorganisms-07-00597-s001.zip › Table S3.xlsx]

## Sheet: Table S3
Table S3. Feed composition, light and temperature regime used during rearing
General composition: wheat (60-70%), corn (5-15%), rape seed (5-8%), soybean meal, barely, bran, minerals and vitamins supplementation
Specific nutritional values
Lysine	g/kg	2019-05-11
Methionine	g/kg	2019-08-04
Threonine	g/kg	2019-07-06
MEd	MJ/kg	12
Ca	g/kg	2019-02-09
P	g/kg	2019-06-03
Na	g/kg	2019-05-01
crude protein	g/kg	185
crude fat	g/kg	33
fiber	g/kg	27
ash	g/kg	58
Day	light (hours)	dark (hours)	temperature	relative humidity
day 1	24	0	32-34 C	0.8
day 2	22	2	27-31 C	0.8
day 3	20	4	25-26 C	0.8
day 4	19	5	23-24 C	0.5
day 5	18	6	21-22 C	0.5
day 6 - day 12	18	6	20 C	0.5
