# Supplementary material for: Gut Anaerobes Capable of Chicken Caecum Colonisation
Source: Microorganisms. 2019 Nov 21;7(12):597. doi: 10.3390/microorganisms7120597 (PMC6956218; doi:10.3390/microorganisms7120597)
Supplement: Supplementary file 1 [file microorganisms-07-00597-s001.zip › Table S4.xlsx]

## Sheet: Table S4
Table S4. OTU table of OTUs forming at least 0.05 % of all microbiota in at least one of the tested samples. Partial 16s rRNA sequence pf each anaerobe was included in calculation as separate sample. Since some isoaltes used for oral inoculation of chickens had the same 16S rRNA sequence, there are only 59 rows with OTUs representing anaerobes used for oral inoculation.
			n. of reads	1	44903	35961	19883	1	32497	12960	11017	1	47926	70295	68758	1	20790	36466	27342	1	34844	24335	29851	1	13163	32837	67290	1	19044	70369	78244	1	35325	49696	31142	1	88584	43576	50685	1	59239	47708	82421	1	57319	41462	25237	1	21281
			Anaerob	Anaerobe inoculum	An3	An3	An3	Anaerobe inoculum	An4	An4	An4	Anaerobe inoculum	An5	An5	An5	Anaerobe inoculum	An9	An9	An9	Anaerobe inoculum	An13	An13	An13	Anaerobe inoculum	An14	An14	An14	Anaerobe inoculum	An15	An15	An15	Anaerobe inoculum	An18	An18	An18	Anaerobe inoculum	An20	An20	An20	Anaerobe inoculum	An22	An22	An22	Anaerobe inoculum	An23	An23	An23	Anaerobe inoculum	An26
			Experiment	x	Exp1	Exp1	Exp1	x	Exp1	Exp1	Exp1	x	Exp7	Exp7	Exp7	x	Exp5	Exp5	Exp5	x	Exp1	Exp1	Exp1	x	Exp2	Exp2	Exp2	x	Exp4	Exp4	Exp4	x	Exp2	Exp2	Exp2	x	Exp7	Exp7	Exp7	x	Exp7	Exp7	Exp7	x	Exp1	Exp1	Exp1	x	Exp2
			Age	x	D7	D7	D7	x	D7	D7	D7	x	D7	D7	D7	x	D7	D7	D7	x	D7	D7	D7	x	D7	D7	D7	x	D7	D7	D7	x	D7	D7	D7	x	D7	D7	D7	x	D7	D7	D7	x	D7	D7	D7	x	D7
			Chick number	An3	An3.1	An3.2	An3.3	An4	An4.1	An4.2	An4.3	An5	An5.1	An5.2	An5.3	An9	An9.1	An9.2	An9.3	An13	An13.1	An13.2	An13.3	An14	An14.1	An14.2	An14.3	An15	An15.1	An15.2	An15.3	An18	An18.1	An18.2	An18.3	An20	An20.1	An20.2	An20.3	An22	An22.1	An22.2	An22.3	An23	An23.1	An23.2	An23.3	An26	An26.1
Sequence	#OTU ID	Taxon	Max
CCTACGGGAGGCAGCAGTGGGGAATATTGGGCAATGGGCGCAAGCCTGACCCAGCAACGCCGCGTGAAGGAAGAAGGCTTTCGGGTTGTAAACTTCTTTTATCAGGGACGAACAAAATGACGGTACCTGATGAATAAGCCACGGCTAACTACGTGCCAGCAGCCGCGGTAATACGTAGGTGGCAAGCGTTATCCGGATTTACTGGGTGTAAAGGGCGTGTAGGCGGGACTGCAAGTCAGGTGTGAAAACCACGGGCTCAACCTGTGGCCTGCATTTGAAACTGTAGTTCTTGAGTGCTGGAGAGGCAATCGGAATTCCGTGTGTAGCGGTGAAATGCGTAGATATACGGAGGAACACCAGTGGCGAAGGCGGATTGCTGGACAGTAACTGACGCTGAGG…	>denovo47414	Bacteria;Firmicutes;Clostridia;Clostridiales;Ruminococcaceae;Pseudoflavonifractor	100		0.674788	0.592308	0.814766	100	1.37859	0.0771605	0.0635382		0.0146059	0.0128032	0.0189069		0.00481	0.0219382	0.0146295		0.0545288	0.11917	0.0234498			0.0243628	0.0772775		0.005251				0.00849257	0.00201223	0.00963329		0.00903098	0.0160639	0.00789188		0.0151927	0.0146726	0.0133461		0.0732741	0.106121	0.0871736		0.0704854
CCTACGGGAGGCAGCAGTAGGGAATCTTCCACAATGGACGCAAGTCTGATGGAGCAACGCCGCGTGAGTGAAGAAGGTTTTCGGATCGTAAAGCTCTGTTGTTGGTGAAGAAGGATAGAGGTAGTAACTGGCCTTTATTTGACGGTAATCAACCAGAAAGTCACGGCTAACTACGTGCCAGCAGCCGCGGTAATACGTAGGTGGCAAGCGTTGTCCGGATTTATTGGGCGTAAAGCGAGCGCAGGCGGAAGAATAAGTCTGATGTGAAAGCCCTCGGCTTAACCGAGGAACTGCATCGGAAACTGTTTTTCTTGAGTGCAGAAGAGGAGAGTGGAACTCCATGTGTAGCGGTGGAATGCGTAGATATATGGAAGAACACCAGTGGCGAAGGCGGCTCTC…	>denovo10151	Bacteria;Firmicutes;Bacilli;Lactobacillales;Lactobacillaceae;Lactobacillus	100		1.78607	0.24749	0.930443		4.0773	2.68519	1.66107			0.00853546	0.0058175		0.00962001	0.359239	0.256016		0.820801	0.143826	7.77193		0.501405	0.465938	2.66013		0.36757	0.234478	2.6673		2.83369	7.6646	16.8197			0.00229484							0.458836	0.123004	0.578516		1.75744
CCTACGGGAGGCAGCAGTGAGGAATATTGGTCAATGGCCGTGAGGCTGAACCAGCCAAGTAGCGTGAAGGATGACGGCCCTACGGGTTGTAAACTTCTTTTATGCGGGATTAACGTGAGGTACGTGTACCTTATTGCAGGTACCGCATGAATAAGCATCGGCTAACTCCGTGCCAGCAGCCGCGGTAATACGGAGGATGCAGGCGTTATCCGGATTTATTGGGTTTAAAGGGAGCGCAGACGGCATGTCAAGTCAGCTGTGAAAGTTCGGGGCTCAACCTTGGAATTGCAGTTGAAACTGGCGTGCTTGAGTTCGGTCGAGGCAGGCGGAATTCGTGGTGTAGCGGTGAAATGCTTAGATATCACGAAGAACCCCGATTGCGAAGGCAGCTTGCCAGGC…	>denovo101565	Bacteria;Bacteroidetes;Bacteroidia;Bacteroidales;Prevotellaceae	100															0.00822684	0.0146295
CCTACGGGAGGCAGCAGTCGAGAATCATTCACAATGGGGGAAACCCTGATGGTGCGACGCCGCGTGGGGGAATGAAGGTCTTCGGATTGTAAACCCCTGTCATGTGGGAGCAAATTAAAAAGATAGTACCACAAGAGGAAGAGACGGCTAACTCTGTGCCAGCAGCCGCGGTAATACAGAGGTCTCAAGCGTTGTTCGGAATCACTGGGCGTAAAGCGTGCGTAGGCTGTTTCGTAAGTCGTGTGTGAAAGGCGCGGGCTCAACCCGCGGACGGCACATGATACTGCGAGACTAGAGTAATGGAGGGGGAACCGGAATTCTCGGTGTAGCAGTGAAATGCGTAGATATCGAGAGGAACACTCGTGGCGAAGGCGGGTTCCTGGACATTAACTGACGCTG…	>denovo102770	Bacteria;Verrucomicrobia;Verrucomicrobiae;Verrucomicrobiales;Verrucomicrobiaceae;Akkermansia	100																											0.30269	0.267113
CCTACGGGAGGCAGCAGTGAGGAATATTGGTCAATGGACGAGAGTCTGAACCAGCCAAGTAGCGTGAAGGATGACTGCCCTATGGGTTGTAAACTTCTTTTATACGGGAATAAAGTGAGGCACGTGTGCCTTTTTGTATGTACCGTATGAATAAGGATCGGCTAACTCCGTGCCAGCAGCCGCGGTAATACGGAGGATCCGAGCGTTATCCGGATTTATTGGGTTTAAAGGGAGCGTAGGCGGACGCTTAAGTCAGTTGTGAAAGTTTGCGGCTCAACCGTAAAATTGCAGTTGATACTGGGTGTCTTGAGTACAGTAGAGGCAGGCGGAATTCGTGGTGTAGCGGTGAAATGCTTAGATATCACGAAGAACTCCGATTGCGAAGGCAGCCTGCTGGAC…	>denovo106450	Bacteria;Bacteroidetes;Bacteroidia;Bacteroidales;Bacteroidaceae;Bacteroides	100				0.00502942										0.00481				0.209505	0.0123279			0.197523	0.228401																			0.261693	0.270127	0.332845
CCTACGGGAGGCAGCAGTAGGGAATATTGCACAATGGGGGAAACCCTGATGCAGCGACGCCGCGTGAGCGAAGAAGTATCTCGGTATGTAAAGCTCTATCAGCAGGGAAGAAGATGACGGTACCTGACTAAGAAGCACCGGCTAAATACGTGCCAGCAGCCGCGGTAATACGTATGGTGCAAGCGTTATCCGGATTTACTGGGTGTAAAGGGAGCGTAGACGGAGAAGCAAGTCTGGAGTGAAAGCCCGGGGCTCAACCCCGGGACTGCTTTGGAAACTGTTATTCTTGAGTGCCGGAGAGGTAAGCGGAATTCCTAGTGTAGCGGTGAAATGCGTAGATATTAGGAGGAACACCAGTGGCGAAGGCGGCTTACTGGACGGTAACTGACGTTGAGGCTC…	>denovo107350	Bacteria;Firmicutes;Clostridia;Clostridiales;Lachnospiraceae	100		6.61426	3.16176	3.28924		0.353879	0.393519	0.426613		7.6952	23.464	1.43838		1.74122	3.30171	3.48182		0.585467	1.92316	0.512546		0.273494	0.231446	0.124833		1.66982	1.59019	3.58238		0.280255	0.229395	0.253677		0.935835	0.757298	1.86446		1.26268	1.98709	1.82235		3.62532	1.1408	2.73804		1.87021
CCTACGGGAGGCAGCAGTGGGGAATCTTGCGCAATGGGGGGAACCCTGACGCAGCGACGCCGCGTGCGGGATGGAGGCCTTCGGGTCGTGAACCGCTTTCAGCAGGGACGAGACTGACGGTACCTGCAGAAGAAGCCCCGGCTAACTACGTGCCAGCAGCCGCGGTAATACGTAGGGGGCTAGCGTTATCCGGATTCATTGGGCGTAAAGCGCGCGTAGGCGGCCGCGCAGGCGGGGGGTCAAATGCCGGGGCTCAACCCCGGCCCGCCCCCCGAACCGCGCGGCTTGGGTCCGGCAGGGGAGGGTGGAACGCCCGGTGTAGCGGTGGAATGCGCAGATATCGGGCGGAACACCGGTGGCGAAGGCGGCCCTCTGGGCCGGCACCGACGCTGAGGCGCG…	>denovo110347	Bacteria;Actinobacteria;Actinobacteria;Coriobacteriales;Coriobacteriaceae;Collinsella	100									100		0.0156483	0.0261788																	100	0.00283086									0.00209608
CCTACGGGTGGCTGCAGTGGGGAATATTGGGCAATGGGGGCAACCCTGACCCAGCGACGCCGCGTGGGTGAAGAAATCCTTCGGGATGTAAAGCCCTGTTGTGTGGGAAGAAGCAATGACGGTACCACACGAGGAAGCCCCGGCAAACTACGTGCCAGCAGCCGCGGTAATACGTAGGGGGCGAGCGTTGTTCGGAATTACTGGGCGTAAAGCGCACGCAGGCGGCCTGTTAAGTCTGCTGTCAAAGGCTGAGGCTCAACCTCAGTTCTACAACAGATACTGGCAGGCTAGAGTATGTGAGAGGGAAGTGGAATTCCCGGTGTAGCGGTGAAATGCGTAGATATCGGGAGGAACACCAGTGGCGAAGGCGGCTTCCTGGCACACTACTGACGCTCATGT…	>denovo111502	Bacteria;Synergistetes;Synergistia;Synergistales;Synergistaceae;Cloacibacillus	100																		0.0516588				0.0379853	0.0213174																		100	0.429177	0.0530606	0.261521
CCTACGGGAGGCAGCAGTGGGGAATCTTCCGCAATGGGCGAAAGCCTGACGGAGCAACGCCGCGTGAGCGAAGACGGCCTTCGGGTTGTAAAGCTCTGTTATACGGGACGAACGGCTAGTGTGCCAATACCACATTAGAATGACGGTACCGTAAGAGAAAGCCACGGCTAACTACGTGCCAGCAGCCGCGGTAATACGTAGGTGGCAAGCGTTGTCCGGAATTATTGGGCGTAAAGGGCGCGCAGGCGGTTTCATAAGTCTGTCTTAAAAGTGCGGGGCTTAACCCCGTGAGGGGACGGAAACTGTGAGACTGGAGTGTCGGAGAGGAAAGCGGAATTCCTAGTGTAGCGGTGAAATGCGTAGATATTAGGAGGAACACCAGTGGCGAAAGCGGCTTTC…	>denovo117751	Bacteria;Firmicutes;Negativicutes;Selenomonadales;Veillonellaceae;Megasphaera	100															0.0109691	0.0109721
CCTACGGGAGGCAGCAGTGGGGAATTTTGCGCAATGGGGGGAACCCTGACGCAGCAACGCCGCGTGCGGGACGAAGGCCTTCGGGTTGTAAACCGCTTTCAGCAGGGAAGAAGTTGACGGTACCTGCAGAAGAAGCCCCGGCTAACTACGTGCCAGCAGCCGCGGTAATACGTAGGGGGCGAGCGTTATCCGGATTCATTGGGCGTAAAGCGCGCGTAGGCGGCCCGTCAAGCGGAACCTCTAACCCGAGGGCTCAACCCCCGGCCGGGTTCCGAACTGGCAGGCTCGAGTTTGGTAGAGGAAGATGGAATTCCCGGTGTAGCGGTGGAATGCGCAGATATCGGGAAGAACACCGATGGCGAAGGCAGTCTTCTGGGCCATCAACTGACGCTGAGGCGC…	>denovo118759	Bacteria;Actinobacteria;Actinobacteria;Coriobacteriales;Coriobacteriaceae;Gordonibacter	100		0.0155892								0.0772024	0.0512127	0.0538119		0.00481												0.031506	0.0241584	0.0191708						0.00338662				0.00844039	0.0293452	0.00485313		0.00697849
CCTACGGGAGGCAGCAGTGGGGAATATTGCACAATGGGGGAAACCCTGATGCAGCGACGCCGCGTGAAGGAAGAAGTATTTCGGTATGTAAACTTCTATCAGCAGGGAAGAAAATGACGGTACCTGACTAAGAAGCCCCGGCTAACTACGTGCCAGCAGCCGCGGTAATACGTAGGGGGCAAGCGTTATCCGGATTTACTGGGTGTAAAGGGAGCGTAGACGGATGTGCAAGCCAGATGTGAAAACCCGGGGCTCAACCCCGGGACTGCATTTGGAACTGTGCATCTAGAGTGCTGGAGAGGTAAGTGGAATTCCTAGTGTAGCGGTGAAATGCGTAGATATTAGGAGGAACACCAGTGGCGAAGGCGGCTTACTGGACAGTAACTGACGTTGAGGCTC…	>denovo119558	Bacteria;Firmicutes;Clostridia;Clostridiales;Lachnospiraceae	100
CCTACGGGAGGCAGCAGTGGGGAATATTGGGCAATGGGCGCAAGCCTGACCCAGCAACGCCGCGTGAAGGATGAAGGCTTTCGGGTTGTAAACTTCTTTTATTCGGGACGAAGAAAATGACGGTACCGAATGAATAAGCCACGGCTAACTACGTGCCAGCAGCCGCGGTAATACGTAGGTGGCAAGCGTTATCCGGATTTACTGGGTGTAAAGGGCGTGTAGGCGGGACTGCAAGTCAGATGTGAAAACTATGGGCTCAACCCATAGCCTGCATTTGAAACTGTAGTTCTTGAGTGCTGGAGAGGCAATCGGAATTCCGTGTGTAGCGGTGAAATGCATAGATATACGGAGGAACACCAGTGGCGAAGGCGGATTGCTGGACAGTAACTGACGCTGAGG…	>denovo124084	Bacteria;Firmicutes;Clostridia;Clostridiales;Ruminococcaceae;Pseudoflavonifractor	100		0.2472	0.453269	0.26153		4.75121	0.324074	0.0998457					100			0.00365738		0.157846	0.760222	0.0870993				0.0267499						0.00283086	0.00201223											0.00872311	0.0506488	0.0316995		0.0516893
CCTACGGGAGGCAGCAGTGGGGAATATTGCACAATGGGGGAAACCCTGATGCAGCGACGCCGCGTGAAGGAAGAAGTATTTCGGTATGTAAACTTCTATCAGCAGGGAAGAAGATGACGGTACCTGAGTAAGAAGCACCGGCTAAATACGTGCCAGCAGCCGCGGTAATACGTATGGTGCAAGCGTTATCCGGATTTACTGGGTGTAAAGGGAGCGTAGACGGATAGGCAAGTCTGGAGTGAAAACCCAGGGCTCAACCCTGGGACTGCTTTGGAAACTGCAGATCTGGAGTGCCGGAGAGGTAAGCGGAATTCCTAGTGTAGCGGTGAAATGCGTAGATATTAGGAGGAACACCAGTGGCGAAGGCGGCTTACTGGACGGTGACTGACGTTGAGGCTC…	>denovo126247	Bacteria;Firmicutes;Clostridia;Clostridiales;Lachnospiraceae	100		0.465448	0.0305887	0.125736		0.0369265	0.123457	0.127076		0.00208655				0.20202	0.21664	0.0365738		0.373091	0.213684	0.0368497		0.311479	0.289308	0.0861941		0.278303	0.456167	0.524002		1.22576	0.708307	0.690386		0.00225774	0.0252433							0.109911	0.0602962	0.229821		0.394718
CCTACGGGAGGCAGCAGTGAGGAATATTGGTCAATGGCCGAGAGGCTGAACCAGCCAAGTCGCGTGAAGGAAGAAGGATCTATGGTTTGTAAACTTCTTTTGTACGGGGGTAAAGTGAGGGACGTGTCCCTTATTGCAAGTACCGTACGAATAAGCATCGGCTAACTCCGTGCCAGCAGCCGCGGTAATACGGAGGATGCGAGCGTTATCCGGATTTATTGGGTTTAAAGGGTGCGTAGGCGGCTATTTAAGTCAGCGGTGAAAGGCCCCCGCTTAACGGGGGAGGCGCCATTGAAACTGGATGGCTTGAGTACGGTTGAGGCAGGCGGAATGCGTGGTGTAGCGGTGAAATGCATAGATATCACGCAGAACCCCGATTGCGAAGGCAGCTTGCCAAGC…	>denovo133577	Bacteria;Bacteroidetes;Bacteroidia;Bacteroidales;Porphyromonadaceae;Parabacteroides	100
CCTACGGGAGGCAGCAGTGGGGAATATTGCACAATGGGGGAAACCCTGATGCAGCGACGCCGCGTGAGTGAAGAAGTATTTCGGTATGTAAAGCTCTATCAGCAGGGAAGAAGATGACGGTACCTGAGTAAGAAGCCCCGGCTAACTACGTGCCAGCAGCCGCGGTAATACGTAGGGGGCAAGCGTTATCCGGATTTACTGGGTGTAAAGGGAGCGTAGACGGTGAAGCAAGTCTGGAGTGAAAACCCGGGGCTTAACCCCGGGATTGCTTTGGAAACTGTTTAACTGGAGTGCAGGAGAGGTAAGCGGAATTCCTAGTGTAGCGGTGAAATGCGTAGATATTAGGAGGAACACCAGTGGCGAAGGCGGCTTACTGGACTGTAACTGACGTTGAGGCTC…	>denovo143	Bacteria;Firmicutes;Clostridia;Clostridiales;Lachnospiraceae;Clostridium XlVa	100		10.1018	25.8447	18.9056		7.78533	7.28395	7.24335		1.34791	10.8528	2.00849		1.12554	3.18379	2.96248		52.2615	52.6895	53.9781		45.7646	38.5967	56.1005		21.2403	9.34502	17.7611		3.48195	51.2999	5.13133		0.846654	7.96769	0.875999		9.07004	13.8006	1.03857		39.1109	46.8429	52.2209		41.4454
CCTACGGGAGGCAGCAGTGGGGAATCTTCCGCAATGGGCGAAAGCCTGACGGAGCAACGCCGCGTGAACGAAGAAGGTCTTAGGATCGTAAAGTTCTGTTGTTAGGGGCGAAGGGCAACATTTTGAATAAGGGTGTTGTTTGACGGTACTTAACGAGGAAGCCACGGCTAACTACGTGCCAGCAGCCGCGGTAATACGTAGGCGGCAAGCGTTGTCCGGAATTATTGGGCGTAAAGGGAGCGCAGGCGGGAAGTTAAGCGGACTTTAAAAGTGCGGGGCTCAACCCCGTGAGGGGGTCCGAACTGACTTTCTTGAGTGCAGGAGAGGGAAGCGGAATTCCTAGTGTAGCGGTGAAATGCGTAGATATTAGGAAGAACACCAGTGGCGAAGGCGGCTTTC…	>denovo15884	Bacteria;Firmicutes;Negativicutes;Selenomonadales;Veillonellaceae;Megamonas	100															0.0438765	0.0621754
CCTACGGGAGGCAGCAGTGGGGAATATTGGGCAATGGGCGCAAGCCTGACCCAGCAACGCCGCGTGAAGGAAGAAGGCTTTCGGGTTGTAAACTTCTTTTGTCGGGGACGAAACAAATGACGGTACCCGACGAATAAGCCACGGCTAACTACGTGCCAGCAGCCGCGGTAATACGTAGGTGGCAAGCGTTATCCGGATTTACTGGGTGTAAAGGGCGTGTAGGCGGGATTGCAAGTCAGATGTGAAAACTGGGGGCTCAACCTCCAGCCTGCATTTGAAACTGTAGTTCTTGAGTGCTGGAGAGGCAATCGGAATTCCGTGTGTAGCGGTGAAATGCGTAGATATACGGAGGAACACCAGTGGCGAAGGCGGATTGCTGGACAGTAACTGACGCTGAGG…	>denovo22503	Bacteria;Firmicutes;Clostridia;Clostridiales;Ruminococcaceae;Flavonifractor	100		0.12694	0.100108	0.367148		0.621596	0.625	0.0453844		5.09953	1.89203	5.08304		2.1645	3.29622	1.47758		0.0746183	0.106842	0.770493		1.17754	2.50327	1.0373		2.10565	1.71382	0.738715		2.31564	1.37838	3.04091		1.21467	1.0694	1.42054		0.670167	0.572231	0.859004		0.158761	0.356953	0.213972		0.681359
CCTACGGGTGGCAGCAGTGGGGAATATTGCGCAATGGGCGAAAGCCTGACGCAGCGACGCCGCGTGAGGGATGAAGGTCTTCGGATCGTAAACCTCTGTCAGAAGGGAAGAAACTAGGGTGCTCTAATCATCATCCTACTGACGGTACCTTCAAAGGAAGCACCGGCTAACTCCGTGCCAGCAGCCGCGGTAATACGGAGGGTGCAAGCGTTAATCGGAATCACTGGGCGTAAAGCGCACGTAGGCTGTTATGTAAGTCAGGGGTGAAATCCCACGGCTCAACCGTGGAACTGCCCTTGATACTGCACGACTTGAATCCGGGAGAGGGTGGCGGAATTCCAGGTGTAGGAGTGAAATCCGTAGATATCTGGAGGAACATCAGTGGCGAAGGCGGCCACC…	>denovo2335	Bacteria;Proteobacteria;Deltaproteobacteria;Desulfovibrionales;Desulfovibrionaceae;Desulfovibrio	100
CCTACGGGAGGCAGCAGTGAGGAATATTGGTCAATGGGCGATGGCCTGAACCAGCCAAGTAGCGTGAAGGATGACTGCCCTATGGGTTGTAAACTTCTTTTATAAAGGAATAAAGTCGGGTATGCATACCCGTTTGCATGTACTTTATGAATAAGGATCGGCTAACTCCGTGCCAGCAGCCGCGGTAATACGGAGGATCCGAGCGTTATCCGGATTTATTGGGTTTAAAGGGAGCGTAGATGGATGTTTAAGTCAGTTGTGAAAGTTTGCGGCTCAACCGTAAAATTGCAGTTGATACTGGATGTCTTGAGTGCAGTTGAGGCAGGCGGAATTCGTGGTGTAGCGGTGAAATGCTTAGATATCACGAAGAACTCCGATTGCGAAGGCAGCCTGCTAAGC…	>denovo26868	Bacteria;Bacteroidetes;Bacteroidia;Bacteroidales;Bacteroidaceae;Bacteroides	100						0.00615441	0.00771605	0.0272306		0.0041731				0.00962001				0.817931	0.00410931			0.417838	0.618205								0.0060367	0.0032111										0.976988	1.07568	1.12533
CCTACGGGAGGCAGCAGTAGGGAATCTTCCACAATGGGCGCAAGCCTGATGGAGCAACGCCGCGTGAATGAAGAAGGTCTTCGGATCGTAAAATTCTGTTGTTAGAGAAGAATATGAGTAATAGTAACTGATTATTCACTGACGGTATCTAACCAGCAAGTCACGGCTAACTACGTGCCAGCAGCCGCGGTAATACGTAGGTGGCAAGCGTTGTCCGGATTTATTGGGCGTAAAGGGAACGCAGGCGGTTTTTTAAGTCTGATGTGAAAGCCTTCGGCTTAACCGGAGATGTGCATTGGAAACTGGAAGACTTGAGTGCAGAAGAGGAGAGTGGAACTCCATGTGTAGCGGTGAAATGCGTAGATATATGGAAGAACACCAGTGGCGAAAGCGGCTCTC…	>denovo30324	Bacteria;Firmicutes;Bacilli;Lactobacillales;Lactobacillaceae;Lactobacillus	100
CCTACGGGTGGCTGCAGTGGGGAATATTGCGCAATGGGCGAAAGCCTGACGCAGCAACGCCGCGTGAGGGATGAAGGTCTTCGGATCGTAAACCTCTGTCGGGAGGGAAAAACGTGCAGTGTGCTAATCAGCATTGCAGTGATGGTACCTCCAAAGGAAGCACCGGCTAACTCCGTGCCAGCAGCCGCGGTAATACGGAGGGTGCAAGCGTTAATCGGAATTACTGGGCGTAAAGCGCACGTAGGTCGTTGTGTAAGTCAGAGGTGTAATCCCACGGCTTAACCGTGGAACTGCCTTTGATACTGCTCAACTTGAATTCGGGAGAGGATAGCGGAACTCCATGTGGAGCAGTGAAATGCGTAGATATATGGAAGAACATCAGTGGCGAAGGCGGCTATC…	>denovo39893	Bacteria;Proteobacteria;Deltaproteobacteria;Desulfovibrionales;Desulfovibrionaceae	100																0.00365738
CCTACGGGAGGCAGCAGTAGGGAATTTTCGGCAATGGGGGGAACCCTGACCGAGCAACGCCGCGTGAAGGAAGAAGGAATTCGTTCTGTAAACTTCTGTTATAAAGGAAGAACGGCGGATATAGGGAATGATATCCGAGTGACGGTACTTTATGAGAAAGCCACGGCTAACTACGTGCCAGCAGCCGCGGTAATACGTAGGTGGCGAGCGTTATCCGGAATTATTGGGCGTAAAGAGGGAGCAGGCGGCGGCAGAGGTCTGTGGTGAAAGACTGAAGCTTAACTTCAGTAAGCCATAGAAACCGGGCTGCTAGAGTGCAGGAGAGGATCGTGGAATTCCATGTGTAGCGGTGAAATGCGTAGATATATGGAGGAACACCAGTGGCGAAGGCGACGGTCT…	>denovo4115	Bacteria;Firmicutes;Erysipelotrichia;Erysipelotrichales;Erysipelotrichaceae;Clostridium XVIII	100		0.138075	0.116793	0.206206		1.47091	0.748457	0.40846		0.116847	2.52223	5.18485		1.00529	0.0438765	0.0182869		0.088968	0.0369838	0.271348		0.311479	0.572525	0.0386387		0.042008	0.0724751	0.023005		0.888889	0.0402447	0.600475		1.07243	0.94318	0.437999		0.513175	0.0586904	0.0291188		0.748443	0.0723554	0.118873	100	0.0516893
CCTACGGGAGGCAGCAGTAGGGAATTTTCGGCAATGGGGGGAACCCTGACCGAGCAACGCCGCGTGAAGGAAGAAGGAATTCGTTCTGTAAACTTCTGTTATAAAGGAAGAACGGCACATATAGGGAATGATATGTGAGTGACGGTACTTTATGAGGAAGCCACGGCTAACTACGTGCCAGCAGCCGCGGTAATACGTAGGTGGCGAGCGTTATCCGGAATTATTGGGCGTAAAGAGGGAGCAGGCGGCAGCAAGGGTCTGTGGTGAAAGGCTGAAGCTTAACTTCAGTGTGCCAGAGAAACCGGGCAGCTAGAGTGCAGGAGAGGATCGTGGAATTCCATGTGTAGCGGTGAAATGCGTAGATATATGGAGGAACACCAGTGGCGAAGGCGACGATCT…	>denovo42996	Bacteria;Firmicutes;Erysipelotrichia;Erysipelotrichales;Erysipelotrichaceae;Clostridium XVIII	100		0.0467675	0.0778621	0.196147		0.00307721				0.0229521	0.580411	0.0596294			0.0137114	0.00365738		0.0114797		0.00669994				0.0326943	100	0.036757	0.0071054	0.00255611		0.00283086				0.0237063	0.114742	0.0157838		0.0286973	0.025153	0.00970626		0.137825	0.062708	0.0198122		0.512194
CCTACGGGTGGCTGCAGTAGGGAATCTTCCACAATGGGCGCAAGCCTGATGGAGCAACACCGCGTGAGTGAAGAAGGGTTTCGGCTCGTAAAACTCTGTTGTTGAAGAAGAACGTGTGTGAGAGTAACTGTTCACGCAGTGACGGTATTCAACCAGAAAGTCACGGCTAACTACGTGCCAGCAGCCGCGGTAATACGTAGGTGGCAAGCGTTATCCGGATTTATTGGGCGTAAAGCGAGCGCAGGCGGTTTTCTAAGTCTGATGTGAAAGCCTTCGGCTTAACCGGAGAAGTGCATCGGAAACTGGATAACTTGAGTGCAAGAGAGGACAGTGGAACTCCATGTGTAGCGGTGGAATGCGTAGATATGTGGAAGAACACCAGTGGCGAAGGCGGCTGTC…	>denovo43142	Bacteria;Firmicutes;Bacilli;Lactobacillales;Lactobacillaceae;Lactobacillus	100
CCTACGGGTGGCAGCAGTGAGGAATATTGGTCAATGGCCGAGAGGCTGAACCAGCCAAGTCGCGTGAAGGATGAAGGATCTATGGTTTGTAAACTTCTTTTATAGGGGAATAAAGTGTGGGACGTGTTCCATTTTGTATGTACCCTATGAATAAGCATCGGCTAACTCCGTGCCAGCAGCCGCGGTAATACGGAGGATGCGAGCGTTATCCGGATTTATTGGGTTTAAAGGGTGCGTAGGTGGTAATTTAAGTCAGCGGTGAAAGTTTGTGGCTCAACCATAAAATTGCCGTTGAAACTGGGTTACTTGAGTGTGTTTGAGGTAGGCGGAATGCGTGGTGTAGCGGTGAAATGCATAGATATCACGCAGAACTCCAATTGCGAAGGCAGCTTACTAAAC…	>denovo44761	Bacteria;Bacteroidetes;Bacteroidia;Bacteroidales;Porphyromonadaceae;Parabacteroides	100						0.00307721																																						0.00396244
CCTACGGGAGGCAGCAGTGAGGAATATTGGTCAATGGGCGAGAGCCTGAACCAGCCAAGTAGCGTGAAGGATGAAGGCTCTATGGGTCGTAAACTTCTTTTATATGGGAATAAAGTTTTCCACGTGTGGAATTTTGTATGTACCATATGAATAAGGATCGGCTAACTCCGTGCCAGCAGCCGCGGTAATACGGAGGATCCGAGCGTTATCCGGATTTATTGGGTTTAAAGGGAGCGTAGGTGGATTGTTAAGTCAGTTGTGAAAGTTTGCGGCTCAACCGTAAAATTGCAGTTGAAACTGGCAGTCTTGAGTACAGTAGAGGTGGGCGGAATTCGTGGTGTAGCGGTGAAATGCTTAGATATCACGAAGAACTCCGATTGCGAAGGCAGCTCACTAGAC…	>denovo4615	Bacteria;Bacteroidetes;Bacteroidia;Bacteroidales;Bacteroidaceae;Bacteroides	100										0.00625965		0.0319963																						0.0112887	0.0390123	0.00789188
CCTACGGGAGGCAGCAGTAGGGAATTTTCGGCAATGGGCGAAAGCCTGACCGAGCAACGCCGCGTGAAGGAAGAAGTCATTCGTGATGTAAACTTCTGTTATAAAGGAAGAACGGCGCCTGTAGGGAATGACAGGCGAGTGACGGTACTTTATGAGGAAGCCACGGCTAACTACGTGCCAGCAGCCGCGGTAATACGTAGGTGGCGAGCGTTATCCGGAATCATTGGGCGTAAAGAGGGAGCAGGCGGCAGTGCAGGTCTGCGGTGAAAGCCCGAAGCTAAACTTCGGTAAGCCGTGGAAACCGCACAGCTAGAGAGCATCAGAGGATCGCGGAATTCCATGTGTAGCGGTGAAATGCGTAGATATATGGAGGAACACCAGTGGCGAAGGCGGCGGTCT…	>denovo4969	Bacteria;Firmicutes;Erysipelotrichia;Erysipelotrichales;Erysipelotrichaceae	100			0.013904	0.0150883		0.329261	0.185185	0.0998457		1.40216	0.257486	2.33137		0.543531	0.3373	0.373052	100	0.00573987	0.00821862			0.00759705	0.0182721	0.374498			0.0312638	0.412811		0.00849257	0.00804894	0.0032111		0.976474	0.112447	1.29624		0.222826	0.329085	0.0630907		0.202376	0.00723554	0.0118873		0.00469903
CCTACGGGAGGCAGCAGTGAGGAATATTGGTCAATGGTCGGCAGACTGAACCAGCCAAGTCGCGTGAAGGAAGACGGCCCTAAGGGTTGTAAACTTCTTTTGTCGGAGAGTAAAGGTCTTCACGAGTGGAGATTTGCAAGTATCCGAAGAAAAAGCATCGGCTAACTCCGTGCCAGCAGCCGCGGTAATACGGAGGATGCGAGCGTTATCCGGATTTATTGGGTTTAAAGGGTGCGTAGGCGGCATGACAAGTCAGCGGTGAAATGCCCGGGCTTAACCCGGGAGCTGCCGTTGAAACTGTCGAGCTAGCGTGCACAAGAGGTAGGCGGAATGCGTGGTGTAGCGGTGAAATGCATAGATATCACGCAGAACCCCGATTGCGAAGGCAGCCTACTAGGG…	>denovo5024	Bacteria;Bacteroidetes;Bacteroidia;Bacteroidales;Porphyromonadaceae;Barnesiella	100										0.456954	0.448112	0.459583			0.019196	0.0548607																		0.842139	0.839912	0.773404	100	60.3167	57.8645	77.0641
CCTACGGGAGGCAGCAGTGGGGAATATTGCACAATGGGGGAAACCCTGATGCAGCGACGCCGCGTGAAGGAAGAAGTATTTCGGTATGTAAACTTCTATCAGCAGGGAAGAAAATGACGGTACCTGACTAAGAAGCCCCGGCTAACTACGTGCCAGCAGCCGCGGTAATACGTAGGGGGCAAGCGTTATCCGGATTTACTGGGTGTAAAGGGAGCGTAGGCGGTCTGACAAGTCAGAAGTGAAAGCCCGGGGCTCAACCTCGGGACTGCTTTTGAAACTGCCGGACTAGATTGCAGGAGAGGTAAGTGGAATTCCTAGTGTAGCGGTGAAATGCGTAGATATTAGGAGGAACACCAGTGGCGAAGGCGGCTTACTGGACTGTAAATGACGCTGAGGCTC…	>denovo51696	Bacteria;Firmicutes;Clostridia;Clostridiales;Lachnospiraceae;Coprococcus	100		0.158119	0.720225	0.377207		0.443118	0.578704	1.35246		0.0104328	0.00995803	0.0058175			0.0137114	0.0256016		0.0803582	0.226012	0.110549		0.250703	0.197947	0.0356665							0.0060367	0.00963329		0.00903098	0.00229484	0.00591891		0.00337615				0.0819972	0.0820028	0.17831		0.0281942
CCTACGGGAGGCAGCAGTAGGGAATCTTCCGCAATGGACGAAAGTCTGACGGAGCAACGCCGCGTGAGTGATGAAGGTTTTCGGATCGTAAAACTCTGTTGTTAGGGAAGAACAAGTACCGTTCGAATAGGGCGGTACCTTGACGGTACCTAACCAGAAAGCCACGGCTAACTACGTGCCAGCAGCCGCGGTAATACGTAGGTGGCAAGCGTTGTCCGGAATTATTGGGCGTAAAGCGCGCGCAGGCGGTTTCTTAAGTCTGATGTGAAAGCCCCCGGCTCAACCGGGGAGGGTCATTGGAAACTGGGGAACTTGAGTGCAGAAGAGGAGAGTGGAATTCCACGTGTAGCGGTGAAATGCGTAGAGATGTGGAGGAACACCAGTGGCGAAGGCGACTCT…	>denovo53428	Bacteria;Firmicutes;Bacilli;Bacillales;Bacillaceae 1;Bacillus	100
CCTACGGGAGGCAGCAGTGGGGAATATTGCACAATGGGGGAAACCCTGATGCAGCAACGCCGCGTGAGTGAAGAAGTATTTCGGTATGTAAAGCTCTATCAGCAGGGAAGATAATGACGGTACCTGACTAAGAAGCTCCGGCTAAATACGTGCCAGCAGCCGCGGTAATACGTATGGAGCAAGCGTTATCCGGATTTACTGGGTGTAAAGGGTGCGTAGGCGGCAGAGCAAGTCAGATGTGAAAGACCGGGGCTCAACCCCGGGGCTGCATTTGAAACTGTTTTGCTGGAGTCCGGGAGAGGCAGGCGGAATTCCTAGTGTAGCGGTGAAATGCGTAGATATTAGGAGGAACACCAGTGGCGAAGGCGGCCTGCTGGACCGGAACTGACGCTGAGGCAC…	>denovo54340	Bacteria;Firmicutes;Clostridia;Clostridiales;Lachnospiraceae;Lachnospiracea_incertae_sedis	100	100	0.0534485	0.0889853	0.0301765		0.015386	0.0385802	0.0181538		5.4146	0.130877	0.125076		0.10582	0.622498	0.855826			0.0164372	0.0368497		0.00759705	0.0274081			0.031506				0.00283086	0.00201223	0.0032111		0.0282218	0.0413071	0.0315675		0.0371377	0.0482099	0.220818		0.00523387	0.00482369	0.00396244
CCTACGGGAGGCAGCAGTGAGGAATATTGGTCAATGGACGCAAGTCTGAACCAGCCATGCCGCGTGCAGGAAGACGGCTCTATGAGTTGTAAACTGCTTTTGTACGAGGGTAAACTCACCTACGTGTAGGTGACTGAAAGTATCGTACGAATAAGGATCGGCTAACTCCGTGCCAGCAGCCGCGGTAATACGGAGGATTCAAGCGTTATCCGGATTTATTGGGTTTAAAGGGTGCGTAGGCGGTTTGATAAGTTAGAGGTGAAATCCCGGGGCTTAACTCCGGAACTGCCTCTAATACTGTTAGACTAGAGAGTAGTTGCGGTAGGCGGAATGTATGGTGTAGCGGTGAAATGCTTAGAGATCATACAGAACACCGATTGCGAAGGCAGCTTACCAAAC…	>denovo59704	Bacteria;Bacteroidetes;Bacteroidia;Bacteroidales;Rikenellaceae;Alistipes	100		0.00222702				0.00307721				0.329675	0.314389	0.388318				0.00365738			0.0246558	0.0435496														0.38043	0.417661	0.365		0.592515	0.465331	0.49138						0.00469903
CCTACGGGAGGCAGCAGTGGGGAATTTTGGACAATGGGCGAAAGCCTGATCCAGCAACGATGCGTGGAGGATGAAGGTTCTCGGATTGTAAACTCCTTTTGAGAGGGAAGAAAAAAATGACGGTACCTCTCGAATAAGCCACGGCTAACTACGTGCCAGCAGCCGCGGTAAGACGTAGGTGGCAAGCGTTACTCGGAATTACTAGGCGTAAAGCGCGCGTAGGCGGGATGTTAAGTCTGTTGTGTAATCTCTGGGCTCAACCCAGAAACTGCAACGGAAACTGGCGTTCTTGAGTGAGGCAGAGGAAATCGGAATTCCTAGTGTAGCAGTGAAATGCGTAGATATTAGGAGGAACACCGGTGGCGAAGGCGGATTTCTGGGCCTTTACTGACGCTAAAG…	>denovo60193	Bacteria;Elusimicrobia;Elusimicrobia;Elusimicrobiales;Elusimicrobiaceae;Elusimicrobium	100
CCTACGGGAGGCAGCAGTGAGGAATATTGGTCAATGGGCGTAAGCCTGAACCAGCCAAGTCGCGTGAGGGATGAAGGTTCTATGGATCGTAAACCTCTTTTATAAGGGAATAAAGTGCGGGACGTGTCCCGTTTTGTATGTACCTTATGAATAAGGATCGGCTAACTCCGTGCCAGCAGCCGCGGTAATACGGAGGATCCGAGCGTTATCCGGATTTATTGGGTTTAAAGGGTGCGTAGGCGGCCTTTTAAGTCAGCGGTGAAAGTCTGTGGCTCAACCATAGAATTGCCGTTGAAACTGGGAGGCTTGAGTATGTTTGAGGCAGGCGGAATGCGTGGTGTAGCGGTGAAATGCTTAGATATCACGCAGAACCCCGATTGCGAAGGCAGCCTGCCAAGC…	>denovo60351	Bacteria;Bacteroidetes;Bacteroidia;Bacteroidales;Porphyromonadaceae;Parabacteroides	100										0.183616	0.202006	0.202158																						0.291249	0.312098	0.286081		0.4389	0.448562	0.39553
CCTACGGGGGGCTGCAGTGGGGAATATTGCACAATGGGCGAAAGCCTGATGCAGCAACGCCGCGTGAAGGATGAAGGGTTTCGGCTCGTAAACTTCTATCAATAGGGAAGAAACAAATGACGGTACCTAAATAAGAAGCCCCGGCTAACTACGTGCCAGCAGCCGCGGTAATACGTAGGGGGCAAGCGTTATCCGGAATTACTGGGTGTAAAGGGAGCGTAGGCGGCATGGTAAGCCAGATGTGAAAGCCTTGGGCTTAACCCGAGGATTGCATTTGGAACTAGCGAGCTAGAGTACAGGAGAGGCAAGCGGAATTCGTAGTGTAGCGGTGAAATGCGTAGATATTAGGAAGAACACCAGTGGCGAAGGCGGCTTTCTGGACTGAAACTGACGCTGAGG…	>denovo61280	Bacteria;Firmicutes;Clostridia;Clostridiales;Lachnospiraceae;Clostridium XlVb	100
CCTACGGGAGGCAGCAGTGGGGAATATTGCACAATGGGGGAAACCCTGATGCAGCGACGCCGCGTGAAGGAAGAAGTATCTCGGTATGTAAACTTCTATCAGCAGGGAAGAAAGTGACGGTACCTGACTAAGAAGCCCCGGCTAATTACGTGCCAGCAGCCGCGGTAATACGTAAGGGGCAAGCGTTATCCGGATTTACTGGGTGTAAAGGGAGCGTAGACGGCAGAGCAAGTCTGATGTGAAAGGCAGGGGCTCAACCCCTGGACTGCATTGGAAACTGTTCGGCTTGAGTGCCGGAGAGGTAAGCGGAATTCCTAGTGTAGCGGTGAAATGCGTAGATATTAGGAGGAACACCAGTGGCGAAGGCGGCTTACTGGACGGCAACTGACGTTGAGGCTC…	>denovo61454	Bacteria;Firmicutes;Clostridia;Clostridiales;Lachnospiraceae;Blautia	100		0.0734917	0.102889	0.145853		0.480044	2.0216	0.499228		0.00208655	0.00284515	0.00145438		0.0913901	0.068557	0.0731475		0.387441	0.135607	1.53094		0.0151941	0.0548162	0.401248		2.13191	2.98427	3.95685		3.36023	2.1209	3.57074		0.00112887		0.00197297		0.00168808	0.104804			0.268672	0.588491	0.590403		0.681359
CCTACGGGAGGCTGCAGTGGGGAATATTGCACAATGGGGGAAACCCTGATGCAGCGACGCCGCGTGAAGGAAGAAGGCCTTCGGGTTGTAAACTTCTGTCGTAAGGGACGATAATGACGGTACCTTACAAGAAAGCCACGGCTAACTACGTGCCAGCAGCCGCGGTAAAACGTAGGTGGCAAGCGTTGTCCGGAATTACTGGGTGTAAAGGGAGCGCAGGCGGGGAGGCAAGTTGGAAGTGAAAAGCGTGGGCTCAACCCACGACCTGCTTTCAAAACTGTCTCTCTTGAGTAGTGCAGAGGTAAGCGGAATTCCCGGTGTAGCGGTGGAATGCGTAGATATCGGGAGGAACACCAGTGGCGAAGGCGGCTTGCTGGGCACCAACTGACGCTGAGGCTC…	>denovo62095	Bacteria;Firmicutes;Clostridia;Clostridiales;Ruminococcaceae;Gemmiger	100
CCTACGGGAGGCAGCAGTAGGGAATCTTCGGCAATGGACGCAAGTCTGACCGAGCAACGCCGCGTGAGTGAAGAAGGTTTTCGGATCGTAAAACTCTGTTGTTAGAGAAGAACAGGGATGAGAGTGGAAAGTTCATCCTATGACGGTATCTAACCAGAAAGCCACGGCTAACTACGTGCCAGCAGCCGCGGTAATACGTAGGTGGCAAGCGTTGTCCGGATTTATTGGGCGTAAAGCGAGCGCAGGCGGTCTTTTAAGTCTGATGTGAAAGCCCACGGCTTAACCGTGGAGGGTCATTGGAAACTGGGAGACTTGAGTGCAGAAGAGGAAAGCGGAATTCCATGTGTAGCGGTGAAATGCGTAGATATATGGAGGAACACCAGTGGCGAAGGCGGCTTT…	>denovo64470	Bacteria;Firmicutes;Bacilli;Lactobacillales;Enterococcaceae;Enterococcus	100												0.00145438																							0.00229484
CCTACGGGAGGCAGCAGTGAGGAATATTGGTCAATGGACGGAAGTCTGAACCAGCCATGCCGCGTGCAGGATGACGGCTCTATGAGTTGTAAACTGCTTTTGTACGAGGGTAAACCCGAATACGTGTATTCGGCTGAAAGTATCGTACGAATAAGGATCGGCTAACTCCGTGCCAGCAGCCGCGGTAATACGGAGGATCCAAGCGTTATCCGGATTTATTGGGTTTAAAGGGTGCGTAGGCGGTCAGATAAGTTAGAGGTGAAATTCCGGTGCTTAACACCGGCGCTGCCTCTAATACTGTTTGACTAGAGAGTAGTTGCGGTAGGCGGAATGTATGGTGTAGCGGTGAAATGCTTAGAGATCATACAGAACACCGATTGCGAAGGCAGCTTACCAAGC…	>denovo67827	Bacteria;Bacteroidetes;Bacteroidia;Bacteroidales;Rikenellaceae;Alistipes	100										0.0542503	0.0199161	0.0130894			0.0109691																			0.00451549		0.00197297				0.0703704
CCTACGGGAGGCAGCAGTGAGGAATATTGGTCAATGGACGAGAGTCTGAACCAGCCAAGTCGCGTGAGGGAAGACTGCCCTATGGGTTGTAAACCTCTTTTATAAGGGAAGAATAAGTTCTACGTGTAGAATGATGCCTGTACCTTATGAATAAGCATCGGCTAACTCCGTGCCAGCAGCCGCGGTAATACGGAGGATGCGAGCGTTATCCGGATTTATTGGGTTTAAAGGGTGCGTAGGCGGTTTATTAAGTTAGTGGTTAAATATTTGAGCTAAACTCAATTGTGCCATTAATACTGGTAAACTGGAGTACAGACGAGGTAGGCGGAATAAGTTAAGTAGCGGTGAAATGCATAGATATAACTTAGAACTCCGATAGCGAAGGCAGCTTACCAGACT…	>denovo68251	Bacteria;Bacteroidetes;Bacteroidia;Bacteroidales;Porphyromonadaceae;Odoribacter	100
CCTACGGGAGGCAGCAGTGGGGAATCTTCCGCAATGGGCGAAAGCCTGACGGAGCAACGCCGCGTGAACGATGAAGGTCTTAGGATCGTAAAGTTCTGTTGTTAGGGACGAAGGGTAAGAATCATAATACGGTTTTTATTTGACGGTACCTAACGAGGAAGCCACGGCTAACTACGTGCCAGCAGCCGCGGTAATACGTAGGCGGCAAGCGTTGTCCGGAATTATTGGGCGTAAAGGGAGCGCAGGCGGGAAACTAAGCGGATCTTAAAAGTGCGGGGCTCAACCCCGTGAGGGGGTCCGAACTGGTTTTCTTGAGTGCAGGAGAGGAAAGCGGAATTCCCAGTGTAGCGGTGAAATGCGTAGATATTGGGAAGAACACCAGTGGCGAAGGCGGCTTTC…	>denovo68673	Bacteria;Firmicutes;Negativicutes;Selenomonadales;Veillonellaceae;Megamonas	100															0.0438765	0.0256016
CCTACGGGGGGCTGCAGTGGGGAATATTGCACAATGGGGGAAACCCTGATGCAGCGACGCCGCGTGGAGGAAGAAGGCCTTCGGGTTGTAAACTCCTGTCGTAAGGGACGATAGTGACGGTACCTTACAAGAAAGTCACGGCTAACTACGTGCCAGCAGCCGCGGTAAAACGTAGGTGGCAAGCGTTGTCCGGAATTACTGGGTGTAAAGGGAGCGCAGGCGGGTCTGCAAGTTGGAAGTGAAACCCATGGGCTCAACCCATGAACTGCTTTCAAAACTGCGGATCTTGAGTGGTGTAGAGGTAGGCGGAATTCCCGGTGTAGCGGTGGAATGCGTAGATATCGGGAGGAACACCAGTGGCGAAGGCGGCCTACTGGGCACTAACTGACGCTGAGGCTC…	>denovo69930	Bacteria;Firmicutes;Clostridia;Clostridiales;Ruminococcaceae;Faecalibacterium	100
CCTACGGGGGGCAGCAGTGGGGAATCTTGCGCAATGGGCGAAAGCCTGACGCAGCGACGCCGCGTTCGGGATGAAGGCCTTCGGGTCGTAAACCGCTTTCAGCAGGGACGAGGCCGCGAGGTGACGGTACCTGCAGAAGAAGCCCCGGCTAACTACGTGCCAGCAGCCGCGGTAATACGTAGGGGGCGAGCGTTATCCGGATTCATTGGGCGTAAAGCGCTCGTAGGCGGTCCGTTAGGTCGGGAGTCAAATCCGGGGGCTCAACCCCCGCCCGCTCCCGATACCGGCGGACTTGAGTTTGGTAGGGGAAGGCGGAATTCCAAGTGTAGCGGTGGAATGCGCAGATATTTGGAAGAACACCGGTGGCGAAGGCGGCCTTCTGGGCCACAACTGACGCTG…	>denovo7062	Bacteria;Actinobacteria;Actinobacteria;Coriobacteriales;Coriobacteriaceae;Olsenella	100															0.00548456	0.0146295
CCTACGGGAGGCAGCAGTGGGGAATATTGGGCAATGGACGCAAGTCTGACCCAGCAACGCCGCGTGAAGGAAGAAGGCTTTCGGGTTGTAAACTTCTTTTGTCAGGGAAGAGTAGAAGACGGTACCTGACGAATAAGCCACGGCTAACTACGTGCCAGCAGCCGCGGTAATACGTAGGTGGCAAGCGTTGTCCGGATTTACTGGGTGTAAAGGGCGTGCAGCCGGGCCGGCAAGTCAGATGTGAAATCTGGAGGCTTAACCTCCAAACTGCATTTGAAACTGTAGGTCTTGAGTACCGGAGAGGTTATCGGAATTCCTTGTGTAGCGGTGAAATGCGTAGATATAAGGAAGAACACCAGTGGCGAAGGCGGATAACTGGACGGCAACTGACGGTGAGGC…	>denovo71378	Bacteria;Firmicutes;Clostridia;Clostridiales;Ruminococcaceae;Oscillibacter	100		0.62802	1.13734	0.306795		1.09856	0.455247	0.889534		0.0041731	0.00284515	0.00872626		0.37037	0.0767839	0.0694902		0.44484	1.17937	0.0502496		0.0607764	0.280172	0.120374		0.283554	3.56691	1.97843		0.0707714	0.068416	0.215144		0.0079021	0.0183587	0.00591891		0.0101285	0.00838434	0.00363985		0.193653	0.371424	0.281333		0.747145
CCTACGGGAGGCAGCAGTGAGGAATATTGGTCAATGGGCGAGAGCCTGAACCAGCCAAGTCGCGTGAGGGAAGAATGGTCTATGGCCTGTAAACCTCTTTTGCCAGGGAAGAATAAAAGGTACGTGTACCTTCTTGCCAGTACCTGACGAATAAGCATCGGCTAACTCCGTGCCAGCAGCCGCGGTAATACGGGGGATGCGAGCGTTATCCGGATTTATTGGGTTTAAAGGGCGCGTAGGCGGGACGCCAAGTCAGCGGTAAAAGACTGCAGCTAAACTGTAGCACGCCGTTGAAACTGGCGACCTGGAGACGAGACGAGGGAGGCGGAACAAGTGAAGTAGCGGTGAAATGCTTAGATATCACTTGGAACCCCGATAGCGAAGGCAGCTTCCCAGGCT…	>denovo71750	Bacteria;Bacteroidetes;Bacteroidia;Bacteroidales;Porphyromonadaceae;Butyricimonas	100				0.0201177																										0.00849257	0.0120734	0.0032111
CCTACGGGAGGCAGCAGTAGGGAATCTTCCACAATGGACGCAAGTCTGATGGAGCAACGCCGCGTGAGTGAAGAAGGTCTTCGGATCGTAAAACTCTGTTGTTAGAGAAGAACACGAGTGAGAGTAACTGTTCATTCGATGACGGTATCTAACCAGCAAGTCACGGCTAACTACGTGCCAGCAGCCGCGGTAATACGTAGGTGGCAAGCGTTGTCCGGATTTATTGGGCGTAAAGGGAACGCAGGCGGTCTTTTAAGTCTGATGTGAAAGCCTTCGGCTTAACCGGAGTAGTGCATTGGAAACTGGAAGACTTGAGTGCAGAAGAGGAGAGTGGAACTCCATGTGTAGCGGTGAAATGCGTAGATATATGGAAGAACACCAGTGGCGAAAGCGGCTCTC…	>denovo72745	Bacteria;Firmicutes;Bacilli;Lactobacillales;Lactobacillaceae;Lactobacillus	100																						0.00759705		0.0104027		0.026255	0.115108	0.0293952
CCTACGGGTGGCAGCAGTGAGGAATATTGGTCAATGGCCGTAAGGCTGAACCAGCCAAGTAGCGTGAAGGACGACGGCCCTACGGGTTGTAAACTTCTTTTATAAGGGAATAAAGTTGCGTACGCGTACGCATTTGCATGTACCTTATGAATAAGCATCGGCTAACTCCGTGCCAGCAGCCGCGGTAATACGGAGGATGCGAGCGTTATCCGGATTTATTGGGTTTAAAGGGAGCGCAGACGGGAGGGTAAGTCAGCTGTGAAAGTTTGCGGCTCAACCGTAAAATTGCAGTTGAAACTGTCTTTCTTGAGTGCGGCAGAGGCAGGCGGAATTCGTGGTGTAGCGGTGAAATGCTTAGATATCACGAAGAACTCCGATTGCGAAGGCAGCCTGCCGGGC…	>denovo75715	Bacteria;Bacteroidetes;Bacteroidia;Bacteroidales;Bacteroidaceae;Bacteroides	100										0.463214	0.416815	0.510486																					100	52.0929	40.4626	49.8392		1.02635	0.970487	0.936654
CCTACGGGAGGCAGCAGTGGGGAATATTGCACAATGGGGGAAACCCTGATGCAGCGACGCCGCGTGAAGGATGAAGTATTTCGGTATGTAAACTTCTATCAGCAGGGAAGAAAATGACGGTACCTGACTAAGAAGCCCCGGCTAACTACGTGCCAGCAGCCGCGGTAATACGTAGGGGGCAAGCGTTATCCGGATTTACTGGGTGTAAAGGGAGCGTAGACGGCTGTGCAAGTCTGGAGTGAAAACCCGGGGCTCAACCCCGGGATTGCTTTGGAAACTGTGTAGCTGGAGTACCGGAGAGGCAAGTGGAATTCCTAGTGTAGCGGTGAAATGCGTAGATATTAGGAGGAACACCAGTGGCGAAGGCGGCTTGCTGGACGGTAACTGACGTTGAGGCTC…	>denovo79144	Bacteria;Firmicutes;Clostridia;Clostridiales;Lachnospiraceae;Dorea	100		0.155892	0.13904	0.120706		0.0369265	0.0617284	0.0181538		0.0208655	0.735472	0.0538119			0.0109691	0.00365738		0.0344392	0.00410931	0.0334997				0.00743052						0.00849257	0.00201223	0.0064222		0.0225774	0.117037	0.0177567		0.0202569	0.0188648	0.0630907		0.294841	0.0530606	0.364544		0.00469903
CCTACGGGAGGCAGCAGTGAGGAATATTGGTCAATGGACGAGAGTCTGAACCAGCCAAGTAGCGTGAAGGATGACTGCCCTATGGGTTGTAAACTTCTTTTATACGGGAATAAAGTTAGCCACGTGTGGTTTTTTGCATGTACCGTATGAATAAGGATCGGCTAACTCCGTGCCAGCAGCCGCGGTAATACGGAGGATCCGAGCGTTATCCGGATTTATTGGGTTTAAAGGGAGCGTAGGCGGGGTATTAAGTCAGTTGTGAAAGTTTGCGGCTCAACCGTAAAATTGCAGTTGATACTGGTATCCTTGAGTGCAGCAGAGGTGGGCGGAATTCGTGGTGTAGCGGTGAAATGCTTAGATATCACGAAGAACTCCGATTGCGAAGGCAGCTCACTGGAG…	>denovo80074	Bacteria;Bacteroidetes;Bacteroidia;Bacteroidales;Bacteroidaceae;Bacteroides	100											0.00426773	0.00872626
CCTACGGGGGGCAGCAGTGGGGAATATTGGGCAATGGGCGCAAGCCTGACCCAGCAACGCCGCGTGAAGGAAGAAGGCTTTCGGGTTGTAAACTTCTTTTGTCAGGGACGAAGCAAGTGACGGTACCTGACGAATAAGCCACGGCTAACTACGTGCCAGCAGCCGCGGTAATACGTAGGTGGCAAGCGTTATCCGGATTTATTGGGTGTAAAGGGCGTGTAGGCGGGATTGCAAGTCAGATGTGAAAACCACGGGCTCAACCTGTGGCCTGCATTTGAAACTGTAGTTCTTGAGTGTCGGAGAGGCAATCGGAATTCCGTGTGTAGCGGTGAAATGCGTAGATATACGGAGGAACACCAGTGGCGAAGGCGGATTGCTGGACGATAACTGACGCTGAGG…	>denovo81458	Bacteria;Firmicutes;Clostridia;Clostridiales;Ruminococcaceae	100		0.0178162	0.0222463	0.035206		0.0461581	0.0231481	0.00907688				0.00290875		0.04329	0.0274228	0.00365738			0.0123279	0.0100499		0.00759705	0.0152267	0.00445831		0.010502	0.00568432	0.00127805		0.00566171	0.00402447	0.0032111		0.00677323	0.00229484			0.00506423		0.00485313			0.00482369	0.00396244		0.00939805
CCTACGGGGGGCAGCAGTGGGGAATCTTCCGCAATGGACGAAAGTCTGACGGAGCAACGCCGCGTGAGTGATGACGGCCTTCGGGTTGTAAAGCTCTGTTAATCGGGACGAAAGAGCCTTGTGTGAATAATGCGAGGGAGTGACGGTACCGGAATAGAAAGCCACGGCTAACTACGTGCCAGCAGCCGCGGTAATACGTAGGTGGCAAGCGTTGTCCGGAATTATTGGGCGTAAAGCGCGCGCAGGCGGATGCGTAAGTCTATCTTAAAAGTGCGGGGCTTAACCCCGTGAGGGGATGGAAACTGGGCATCTAGAGTATCGGAGAGGAAAGCGGAATTCCTAGTGTAGCGGTGAAATGCGTAGATATTAGGAAGAACACCAGTGGCGAAGGCGGCTTTC…	>denovo90588	Bacteria;Firmicutes;Negativicutes;Selenomonadales;Veillonellaceae;Veillonella	100
CCTACGGGAGGCAGCAGTAGGGAATCTTCCACAATGGGCGCAAGCCTGATGGAGCAACACCGCGTGAGTGAAGAAGGGTTTCGGCTCGTAAAGCTCTGTTGTTGGAGAAGAACGTGCGTGAGAGTAACTGTTCACGCAGTGACGGTATCCAACCAGAAAGTCACGGCTAACTACGTGCCAGCAGCCGCGGTAATACGTAGGTGGCAAGCGTTATCCGGATTTATTGGGCGTAAAGCGAGCGCAGGCGGTTGCTTAGGTCTGATGTGAAAGCCTTCGGCTTAACCGAAGAAGGGCATCGGAAACCGGGCGACTTGAGTGCAGAAGAGGACAGTGGAACTCCATGTGTAGCGGTGGAATGCGTAGATATATGGAAGAACACCAGTGGCGAAGGCGGCTGTC…	>denovo91365	Bacteria;Firmicutes;Bacilli;Lactobacillales;Lactobacillaceae;Lactobacillus	100		0.109124	0.0305887	0.0502942		0.196941	0.0617284	0.0181538		0.0625965	0.0711288	0.27924			0.0137114	0.00731475		0.0172196	0.0164372	0.502496		0.0151941	0.00304535	0.0757914		0.015753	0.00852648	0.269669		0.0254777	0.138844	0.067433		0.00564436	0.0160639	0.00197297		0.0101285	0.0188648	0.00242657		0.0296586	0.0361777	0.0554741
CCTACGGGAGGCAGCAGTGGGGAATATTGCGCAATGGGGGCAACCCTGACGCAGCAACGCCGCGTGATTGATGAAGGTCTTCGGATTGTAAAAATCTTTAATCAGGGACGAAACAAATGACGGTACCTGAAGAATAAGCTCCGGCTAACTACGTGCCAGCAGCCGCGGTAATACGTAGGGAGCAAGCGTTATCCGGATTTACTGGGTGTAAAGGGCGTGTAGGCGGGCTTGTAAGTTGGAAGTGAAATCTCGGGGCTTAACCCCGAAACTGCTTTCAAAACTGCGAGTCTTGAGTGATGGAGAGGCAGGCGGAATTCCCAGTGTAGCGGTGAAATGCGTAGATATTGGGAGGAACACCAGTGGCGAAGGCGGCCTGCTGGACATTAACTGACGCTGAGG…	>denovo91723	Bacteria;Firmicutes;Clostridia;Clostridiales;Ruminococcaceae;Butyricicoccus	100		0.0690377	0.00278079	0.035206												0.00365738																			0.00229484
CCTACGGGAGGCAGCAGTGGGGAATATTGCACAATGGGGGAAACCCTGATGCAGCGACGCCGCGTGGAGGAAGAAGGTCTTCGGATTGTAAACTCCTGTTGTTGGGGAAAAAGAGGATGGTACCCAACAAGGAAGTGACGGCTAACTACGTGCCAGCAGCCGCGGTAAAACGTAGGTCACGAGCGTTGTCCGGAATTACTGGGTGTAAAGGGAGCGCAGGCGGGTATGCAAGTTGGGAGTGAAATACATGGGCTCAACCCATGAACTGCTCTCAAAACTGTGTATCTTGAGTAGTGCAGAGGTAGGCGGAATTCCCGGTGTAGCGGTGGAATGCGTAGATATCGGGAGGAACACCAGTGGCGAAGGCGGCCTACTGGGCACCAACTGACGCTGAGGCTC…	>denovo93722	Bacteria;Firmicutes;Clostridia;Clostridiales;Ruminococcaceae;Faecalibacterium	100		25.27	4.81911	9.0932		0.950857	1.23457	12.3083		0.323415	0.401167	0.337415			0.0137114	0.0182869		0.396051	1.13006	1.08539		0.0303882		0.00594442						0.138712	0.068416	0.0834885		0.214486	0.273086	0.282135		0.180624	0.169783	0.112835		0.46058	0.448604	0.590403		0.0281942
CCTACGGGAGGCAGCAGTGGGGAATATTGCACAATGGGGGAAACCCTGATGCAGCGACGCCGCGTGAGTGAAGAAGTATTTCGGTATGTAAAGCTCTATCAGCAGGGAAGAAAATGACGGTACCTGACTAAGAAGCCCCGGCTAACTACGTGCCAGCAGCCGCGGTAATACGTAGGGGGCAAGCGTTATCCGGATTTACTGGGTGTAAAGGGAGCGTAGACGGCAAGGCAAGTCTGAAGTGAAAGCCCGGGGCTTAACCGCGGGACTGCTTTGGAAACTGTCTGGCTGGAGTGCCGGAGAGGTAAGCGGAATTCCTAGTGTAGCGGTGAAATGCGTAGATATTAGGAGGAACACCAGTGGCGAAGGCGGCTTACTGGACGGTAACTGACGTTGAGGCTC…	>denovo9539	Bacteria;Firmicutes;Clostridia;Clostridiales;Lachnospiraceae;Clostridium XlVa	100		2.50317	1.05114	1.41327		3.47724	6.67438	2.99537		12.0603	2.1111	15.7582		3.79509	19.2865	3.28067		0.777752	0.452024	0.515896	100	2.19555	6.53836	0.87383		1.3075	1.36424	3.11078		7.27247	1.94986	8.50299		4.80109	7.21498	5.43553		4.78232	5.05576	0.888123		1.3137	0.959915	2.33387		1.12307
CCTACGGGGGGCTGCAGTGGGGAATATTTCACAATGGGGGAAACCCTGATGCAGCGACGCCGCGTGGAGGAAGAAGGTCTTCGGATTGTAAACTCCTGTTGTTGAGGAAGAAAAGGACGGTACTCAACAAGGAAGTGACGGCTAACTACGTGCCAGCAGCCGCGGTAAAACGTAGGTCACGAGCGTTGTCCGGAATTACTGGGTGTAAAGGGAGCGCAGGCGGGTAGACAAGTTGGGAGTGAAATGCATGGGCTCAACCCATGAACTGCTCTCAAAACTGTAGATCTTGAGTAGGGCAGAGGTAGGCGGAATTCCGGGTGTAGCGGTGGAATGCGTAGATATCGGGAGGAACACCAGTGGCGAAGGCGGCCTACTGGGCACCAACTGACGCTGAGGCTC…	>denovo96557	Bacteria;Firmicutes;Clostridia;Clostridiales;Ruminococcaceae;Faecalibacterium	100
CCTACGGGAGGCAGCAGTGGGGGATATTGCACAATGGGGGAAACCCTGATGCAGCAACGCCGCGTGAAGGAAGAAGGTCTTCGGATTGTAAACTTCTGTCCTCAGGGAAGATAATGACGGTACCTGAGGAGGAAGCTCCGGCTAACTACGTGCCAGCAGCCGCGGTAATACGTAGGGAGCGAGCGTTGTCCGGATTTACTGGGTGTAAAGGGTGCGTAGGCGGATCTGCAAGTCAGTAGTGAAATCCCAGGGCTTAACCCTGGAACTGCTATTGAAACTGTGGGTCTTGAGTGAGGTAGAGGCAGGCGGAATTCCCGGTGTAGCGGTGAAATGCGTAGAGATCGGGAGGAACACCAGTGGCGAAGGCGGCCTGCTGGGCCTTAACTGACGCTGAGGCAC…	>denovo97596	Bacteria;Firmicutes;Clostridia;Clostridiales;Ruminococcaceae;Clostridium IV	100		0.171481	0.0333695	0.145853		0.415423	0.100309	0.281383		0.0146059	0.0170709	0.699555		0.40885	2.00461	0.106064		0.0573987	0.0821862	0.291448		0.0987617	0.283217	0.784663		2.49422	4.08418	4.15751		0.651097	0.688184	1.06608		0.15014	0.0757298	0.0138108		0.0253212	0.138342	0.00242657		0.106422	0.0458251	0.0990609		0.0939805
CCTACGGGAGGCAGCAGTGGGGGATATTGCACAATGGGCGAAAGCCTGATGCAGCGACGCCGCGTGAGGGAAGACGGTCTTCGGATTGTAAACCTCTGTCTTTGGGGAAGAAAATGACGGTACCCAAAGAGGAAGCTCCGGCTAACTACGTGCCAGCAGCCGCGGTAATACGTAGGGAGCAAGCGTTGTCCGGAATTACTGGGTGTAAAGGGAGCGTAGGCGGGATGGCAAGTAGAATGTTAAATCCATCGGCTCAACCGGTGGCTGCGTTCTAAACTGCCGTTCTTGAGTGAAGTAGAGGCAGGCGGAATTCCTAGTGTAGCGGTGAAATGCGTAGATATTAGGAGGAACACCAGTGGCGAAGGCGGCCTGCTGGGCTTTAACTGACGCTGAGGCTCG…	>denovo9955	Bacteria;Firmicutes;Clostridia;Clostridiales;Ruminococcaceae;Anaerotruncus	100		0.347416	0.428242	0.095559		0.0769302	0.300926	0.245076		1.43555	0.699908	1.63472		0.23569	0.452476	0.329164		0.189416	0.0780768	0.0267998		0.0303882	0.258854	0.0802497		1.05545	0.801489	0.561065		1.00495	0.269639	0.314688		0.314955	0.670094	0.424189		0.0979085	0.236858	0.0922095		0.0331478	0.0337659	0.48738		0.296039
CCTACGGGTGGCAGCAGTAGGGAATTTTCGTCAATGGGGGGAACCCTGAACGAGCAATGCCGCGTGAGTGAAGACGGTCTTCGGATTGTAAAGCTCTGTTGCGAGAGAAAAACGACACGGATAGGGAATGATCCGTGGGTGATGGTATCTCGCCAGAAAGTCACGGCTAACTACGTGCCAGCAGCCGCGGTAATACGTAGGTGGCGAGCGTTATCCGGAATGATTGGGCGTAAAGGGTGCGTAGGCGGCCCGTTAAGTCTGGAGTCAAAGCCGGCAGCTCAACTGTCGTACGCTTTGGAAACTGGCGGGCTGGAGTGCAGAAGAGGGCGATGGAACTCCATGTGTAGCGGTAAAATGCGTAGATATATGGAAGAACACCAGTGGCGAAGGCGGTCGCCT…	>denovo99979	Bacteria;Firmicutes;Erysipelotrichia;Erysipelotrichales;Erysipelotrichaceae;Erysipelotrichaceae_incertae_sedis	100
CCTACGGGTGGCTGCAGTGAGGAATATTGGTCAATGGACGAGAGTCTGAACCAGCCAAGTAGCGTGAAGGATGACTGCCCTATGGGTTGTAAACTTCTTTTATATGGGAATAAAGTATTCCACGTGTGGGATTTTGTATGTACCATATGAATAAGGATCGGCTAACTCCGTGCCAGCAGCCGCGGTAATACGGAGGATCCGAGCGTTATCCGGATTTATTGGGTTTAAAGGGAGCGTAGGTGGATTGTTAAGTCAGTTGTGAAAGTTTGCGGCTCAACCGTAAAATTGCAGTTGAAACTGGCAGTCTTGAGTACAGTAGAGGTGGGCGGAATTCGTGGTGTAGCGGTGAAATGCTTAGATATCACGAAGAACTCCGATTGCGAAGGCAGCTCACTAGAC…	>denovo5665	Bacteria;Bacteroidetes;Bacteroidia;Bacteroidales;Bacteroidaceae;Bacteroides	40.0857										0.00208655																										0.0157838
CCTACGGGAGGCAGCAGTGGGGAATATTGCACAATGGGCGCAAGCCTGATGCAGCCATGCCGCGTGTATGAAGAAGGCCTTCGGGTTGTAAAGTACTTTCAGCGGGGAGGAAGGGAGTAAAGTTAATACCTTTGCTCATTGACGTTACCCGCAGAAGAAGCACCGGCTAACTCCGTGCCAGCAGCCGCGGTAATACGGAGGGTGCAAGCGTTAATCGGAATTACTGGGCGTAAAGCGCACGCAGGCGGTTTGTTAAGTCAGATGTGAAATCCCCGGGCTCAACCTGGGAACTGCATCTGATACTGGCAAGCTTGAGTCTCGTAGAGGGGGGTAGAATTCCAGGTGTAGCGGTGAAATGCGTAGAGATCTGGAGGAATACCGGTGGCGAAGGCGGCCCCC…	>denovo30590	Bacteria;Proteobacteria;Gammaproteobacteria;Enterobacteriales;Enterobacteriaceae;Escherichia/Shigella	40		0.405318	0.42268	0.296736		2.0925	1.54321	0.571844		23.1294	16.5972	14.5714		8.75902	4.36297	6.68569		0.86098	1.30676	3.20257		1.88407	1.12678	2.63932		2.00588	4.66256	1.3509		5.07573	2.12693	4.25149		2.66527	3.17606	7.92739		1.80455	3.27408	3.57433		0.720529	3.63948	1.36704		4.22912
CCTACGGGAGGCAGCAGTGGGGAATATTGCACAATGGGGGAAACCCTGATGCAGCGACGCCGCGTGAAGGAAGAAGTATCTCGGTATGTAAACTTCTATCAGCAGGGAAGAAAATGACGGTACCTGACTAAGAAGCCCCGGCTAACTACGTGCCAGCAGCCGCGGTAATACGTAGGGGGCAAGCGTTATCCGGATTTACTGGGTGTAAAGGGAGCGTAGACGGAAGGGCAAGTCTGGAGTGAAAGCCCGGGGCTCAACCCCGGGACTGCTTTGGAAACTGTCCGTCTTGAGTGCCGGAGAGGTAAGCGGAATTCCTAGTGTAGCGGTGAAATGCGTAGATATTAGGAGGAACACCAGTGGCGAAGGCGGCTTACTGGACGGTAACTGACGTTGAGGCTC…	>denovo49118	Bacteria;Firmicutes;Clostridia;Clostridiales;Lachnospiraceae;Blautia	34.2271		0.650291	0.378187	0.628678		5.16355	4.9537	12.2719		7.84126	4.3289	9.69633		7.19577	5.50924	8.28762		3.66204	2.16561	2.42203		4.58862	4.34266	3.64244		2.27893	3.04395	1.84679		8.55202	4.65631	4.77811		5.96157	8.28667	6.52461		1.69821	2.4105	0.190485		0.504196	1.31446	0.630027		1.64466
CCTACGGGAGGCAGCAGTGGGGAATATTGGGCAATGGGCGCAAGCCTGACCCAGCAACGCCGCGTGAAGGAAGAAGGCCCTCGGGTTGTAAACTTCTTTTGTCAGGGACGAAGCAAGTGACGGTACCTGACGAATAAGCCACGGCTAACTACGTGCCAGCAGCCGCGGTAATACGTAGGTGGCAAGCGTTATCCGGATTTACTGGGTGTAAAGGGCGTGTAGGCGGGATTGCAAGTCAGATGTGAAAACCACGGGCTCAACCTGTGGCCTGCATTTGAAACTGCAGTTCTTGAGTACTGGAGAGGCAGACGGAATTCCTAGTGTAGCGGTGAAATGCGTAGATATTAGGAGGAACACCAGTGGCGAAGGCGGTCTGCTGGACAGCAACTGACGCTGAGG…	>denovo28835	Bacteria;Firmicutes;Clostridia;Clostridiales;Ruminococcaceae	31.4172		1.24268	1.32088	1.38812		11.6749	5.46296	4.22075		0.323415	0.93321	1.56636		23.5642	15.6063	25.3639		0.823671	3.87919	0.860943		4.49745	6.37391	5.1018		18.8406	7.61273	5.23235		8.2293	1.9076	6.84606		7.19204	1.14513	0.201243		5.07098	0.408736	4.47459		0.652489	2.08384	0.344732		2.45289
CCTACGGGAGGCAGCAGTGGGGAATATTGCACAATGGGGGAAACCCTGATGCAGCGACGCCGCGTGAGTGAAGAAGTATTTCGGTATGTAAAGCTCTATCAGCAGGGAAGAAAATGACGGTACCTGACTAAGAAGCCCCGGCTAACTACGTGCCAGCAGCCGCGGTAATACGTAGGGGGCAAGCGTTATCCGGATTTACTGGGTGTAAAGGGAGCGTAGACGGCGAAGCAAGTCTGAAGTGAAAACCCAGGGCTCAACCCTGGGACTGCTTTGGAAACTGTTTTGCTAGAGTGCTGGAGAGGTAAGTGGAATTCCTAGTGTAGCGGTGAAATGCGTAGATATTAGGAGGAACACCAGTGGCGAAGGCGGCTTACTGGACAGTAACTGACGTTGAGGCTC…	>denovo97616	Bacteria;Firmicutes;Clostridia;Clostridiales;Lachnospiraceae;Clostridium XlVa	30.1718		0.939804	1.20686	1.15677		1.14472	0.563272	1.42507		8.50269	6.2195	9.85631		12.4435	8.51478	5.83352		5.5648	2.18204	0.881043		3.65418	2.99053	0.526081		4.10103	6.3977	4.08849		1.05308	0.454765	1.64408		6.33184	7.22416	5.21061		2.06283	2.05835	1.05677		2.86293	2.80498	2.00103		0.897514
CCTACGGGTGGCAGCAGTGAGGAATATTGGTCAATGGACGCAAGTCTGAACCAGCCATGCCGCGTGCAGGAAGACGGCTCTATGAGTTGTAAACTGCTTTTGTACGGGGGTAAACTCGGATACGTGTATCTGACTGAAAGTACCGTACGAATAAGGATCGGCTAACTCCGTGCCAGCAGCCGCGGTAATACGGAGGATCCAAGCGTTATCCGGATTTATTGGGTTTAAAGGGTGCGTAGGCGGTTTGATAAGTTAGAGGTGAAATCCCGGGGCTTAACTCCGGCACTGCCTCTGATACTGTTGGACTAGAGAGTAGTTGCGGTAGGCGGAATGTATGGTGTAGCGGTGAAATGCTTAGAGATCATACAGAACACCGATTGCGAAGGCAGCTTACCAAAC…	>denovo102194	Bacteria;Bacteroidetes;Bacteroidia;Bacteroidales;Rikenellaceae;Alistipes	22.261		0.287286	0.303106			0.249254	0.347222	0.426613											0.221903	0.190948		0.151941	0.197947									0.0160555
CCTACGGGTGGCTGCAGTGGGGAATATTGCACAATGGGGGAAACCCTGATGCAGCGACGCCGCGTGAGTGAAGAAGTATTTCGGTATGTAAAGCTCTATCAGCAGGGAAGAAAATGACGGTACCTGACTAAGAAGCCCCGGCTAACTACGTGCCAGCAGCCGCGGTAATACGTAGGGGGCAAGCGTTATCCGGATTTACTGGGTGTAAAGGGAGCGTAGACGGCGCGGCAAGTCTGAAGTGAAAGCCCGGGGCTTAACCCCGGGACTGCTTTGGAAACTGCCATGCTGGAGTGCTGGAGAGGTAAGTGGAATTCCTAGTGTAGCGGTGAAATGCGTAGATATTAGGAGGAACACCAGTGGCGAAGGCGGCTTACTGGACAGTAACTGACGTTGAGGCTC…	>denovo71895	Bacteria;Firmicutes;Clostridia;Clostridiales;Lachnospiraceae;Clostridium XlVa	21.9283		2.69247	3.38144	2.63542		4.13884	17.7701	1.5703		0.0229521	0.0199161	0.0319963		0.00481	2.45434	2.46873		0.367352	1.38484	0.783893		0.0379853	0.0548162	0.922871		0.005251	0.00142108	0.00383416		1.52583	1.56954	0.844519		0.0135465	0.0229484	0.0197297		0.021945	0.0188648	0.00242657		2.86293	0.455839	0.768713		1.14186
CCTACGGGAGGCAGCAGTGGGGAATATTGCACAATGGGGGAAACCCTGATGCAGCGACGCCGCGTGAGCGAAGAAGTATTTCGGTATGTAAAGCTCTATCAGCAGGGAAGATAATGACGGTACCTGACTAAGAAGCCCCGGCTAACTACGTGCCAGCAGCCGCGGTAATACGTAGGGGGCAAGCGTTATCCGGATTTACTGGGTGTAAAGGGAGCGTAGACGGCGAAGCAAGTCTGGTGTGAAAACCCGGGGCTCAACCCCGGGCCTGCATTGGAAACTGTTTTGCTTGAGTGCCGGAGAGGTAAGCGGAATTCCTAGTGTAGCGGTGAAATGCGTAGATATTAGGAGGAACACCAGTGGCGAAGGCGGCTTACTGGACGGCAACTGACGTTGAGGCTC…	>denovo45546	Bacteria;Firmicutes;Clostridia;Clostridiales;Lachnospiraceae	18.7346		0.387502	1.8965	0.115677		2.17251	0.416667	0.471998		0.0667696	0.214809	0.0698101		1.00048	1.39856	0.0329164		0.688784	1.44237	0.659944		0.212717	0.283217	0.107						0.00566171	0.00402447	0.0128444		0.0383816	0.0665504	0.0374864		0.0337615	0.0356334	0.0109195		0.863588	3.30423	1.83065		2.58447
CCTACGGGAGGCAGCAGTGGGGAATATTGGGCAATGGAGGCAACTCTGACCCAGCAACGCCGCGTGAATGATGAAGGTCTTCGGATTGTAAAGTTCTGTGACGGGGGACGAACACAATGACGGTACCCCGATAGCAAGCCACGGCTAACTACGTGCCAGCAGCCGCGGTAATACGTAGGTGGCAAGCGTTATCCGGAATGACTGGGCGTAAAGGGTGCGTAGGTGGTTTAGCAAGTTGGCAGCGTAATTCCGGGGCTCAACTCCGGCGCTACTGCCAAAACTGTTGAACTTGAGTGCAGGAGGGGTAAGTGGAATTCCTAGTGTAGCGGTGGAATGCGTAGATATTAGGAGGAACATCGGTGGCGAAGGCGACTTACTGGACTGTAACTGACACTGAGG…	>denovo148	Bacteria;Firmicutes;Clostridia;Clostridiales	18.2896		0.594615	0.0444926	0.0704119		0.0246177	0.401235	0.00907688			0.00142258				0.00274228			0.00573987	0.0205465	0.0234498		0.00759705		0.00445831		1.27599	7.14377	3.03921			0.00201223							0.0371377				0.00697849	0.00241185
CCTACGGGAGGCAGCAGTGGGGAATATTGGACAATGGGGGAAACCCTGATCCAGCGACGCCGCGTGACTGAAGAAGTATTTCGGTATGTAAAGGTCTATCAGCAGGGAAGAAAATGACGGTACCTGACTAAGAAGCCCCGGCTAACTACGTGCCAGCAGCCGCGGTAATACGTAGGGGGCAAGCGTTATCCGGATTTACTGGGTGTAAAGGGAGCGTAGACGGCGAAGCAAGTCTGAAGTGAAAGCCCGGGGCTCAACCCCGGAATTGCTTTGGAAACTGTTTTGCTGGAGTGCAGGAGAGGCAAGCGGAATTCCTAGTGTAGCGGTGAAATGCGTAGATATTAGGAGGAACACCAGTGGCGAAGGCGGCTTGCTGGACTGTAACTGACGTTGAGGCTC…	>denovo79057	Bacteria;Firmicutes;Clostridia;Clostridiales;Lachnospiraceae;Clostridium XlVa	17.4298		0.0512215	0.0444926	0.553236		0.32003	0.0694444	0.0363075		2.16375	0.768191	6.79775		0.880231	1.18467	1.10819		1.76214	0.0739675	2.67998		1.64856	1.03237	1.78927		0.378072	0.0468957	0.447319		3.16207	2.63804	1.34545		2.04552	0.637966	3.34616		0.592515	0.345854	0.0618774		0.226801	0.306305	0.221896		0.972699
CCTACGGGAGGCAGCAGTCGGGAATATTGCGCAATGGAGGAAACTCTGACGCAGTGACGCCGCGTATGGGAAGAAGGTTTTCGGATTGTAAACCATTTTAGACAAGGAAGAAAGAAGACAGTACTTGTAGAATAAGCTCCGGCTAACTACGTGCCAGCAGCCGCGGTAATACGTAGGGAGCAAGCGTTATCCGGATTTATTGGGTGTAAAGGGTGCGTAGACGGGAAGGTAAGTTAGTTGTGAAATCCCTCGGCTCAACTGAGGAACTGCGACTAAAACTGCTTTTCTTGAGTGCTGGAGAGGAAAGTGGAATTCCTAGTGTAGCGGTGAAATGCGTAGATATTAGGAGGAACACCAGTGGCGAAGGCGACTTTCTGGACAGTAACTGACGTTGAGGCA…	>denovo62748	Bacteria;Firmicutes;Clostridia;Clostridiales	12.5848		0.0133621	0.0250271	0.035206		0.0307721	0.0385802	0.0181538		0.100154	0.133722	0.114896						0.00573987	0.0205465	0.0267998										0.0141543	0.0160979	0.0256888		0.0654746	0.0894988	0.0710269		0.065835	0.075459	0.0630907		0.0209355	0.0265303	0.00792487
CCTACGGGAGGCAGCAGTGGGGAATATTGCACAATGGGCGCAAGCCTGATGCAGCCATGCCGCGTGTATGAAGAAGGCCTTAGGGTTGTAAAGTACTTTCAGCGGGGAGGAAGGTGATAAGGTTAATACCCTTGTCAATTGACGTTACCCGCAGAAGAAGCACCGGCTAACTCCGTGCCAGCAGCCGCGGTAATACGGAGGGTGCAAGCGTTAATCGGAATTACTGGGCGTAAAGCGCACGCAGGCGGTCAATTAAGTCAGATGTGAAAGCCCCGAGCTTAACTTGGGAATTGCATCTGAAACTGGTTGGCTAGAGTCTTGTAGAGGGGGGTAGAATTCCATGTGTAGCGGTGAAATGCGTAGAGATGTGGAGGAATACCGGTGGCGAAGGCGGCCCCC…	>denovo124003	Bacteria;Proteobacteria;Gammaproteobacteria;Enterobacteriales;Enterobacteriaceae;Proteus	11.7844															0.00274228											0.078765	0.035527	0.0281172
CCTACGGGTGGCTGCAGTGGGGAATATTGCACAATGGGGGAAACCCTGATGCAGCGACGCCGCGTGAGTGAAGAAGTATTTCGGTATGTAAAGCTCTATCAGCAGGGAAGAAAATGACGGTACCTGACTAAGAAGCCCCGGCTAACTACGTGCCAGCAGCCGCGGTAATACGTAGGGGGCAAGCGTTATCCGGATTTACTGGGTGTAAAGGGAGCGTAGACGGCATGGCAAGTCTGGAGTGAAAACCCAGGGCTCAACCTTGGGATTGCTTTGGAAACTGTCAAGCTGGAGTGCCGGAGAGGTAAGCGGAATTCCTAGTGTAGCGGTGAAATGCGTAGATATTAGGAGGAACACCAGTGGCGAAGGCGGCTTACTGGACGGTAACTGACGTTGAGGCTC…	>denovo81503	Bacteria;Firmicutes;Clostridia;Clostridiales;Lachnospiraceae;Clostridium XlVa	11.5669		0.0823998	0.150163	0.834884		0.692372	0.162037	0.617228		3.27171	0.214809	0.51194		2.66955	1.20935	1.89086		0.86959	0.193137	0.733644		2.75013	1.40695	1.21415		1.65932	3.29264	1.3394		11.5669	1.26167	1.24912		0.097083	1.30347	0.110486		0.248147	0.259914	1.02158		0.631553	0.641551	0.800412		1.01969
CCTACGGGAGGCAGCAGTGGGGAATATTGCACAATGGGGGGAACCCTGATGCAGCGACGCCGCGTGAGTGAAGAAGTACTTCGGTATGTAAAGCTCTATCAGCAGGGAAGAAAATGACGGTACCTGACTAAGAAGCCCCGGCTAACTACGTGCCAGCAGCCGCGGTAATACGTAGGGGGCAAGCGTTATCCGGAATTACTGGGTGTAAAGGGTGCGTAGGTGGCAGGGCAAGTCAGAAGTGAAAGCCCGGGGCTTAACTCCGGGACTGCTTTTGAAACTGCCAGGCTGGAGTGCAGGAGAGGTAAGCGGAATTCCTAGTGTAGCGGTGAAATGCGTAGATATTAGGAGGAACATCAGTGGCGAAGGCGGCTTACTGGACTGAAACTGACACTGAGGCAC…	>denovo62708	Bacteria;Firmicutes;Clostridia;Clostridiales;Lachnospiraceae;Anaerostipes	11.3263		0.672561	0.322572	0.502942		0.735453	0.941358	2.76845						0.12025	0.227609	0.106064		1.45506	0.920485	0.422096		1.11677	2.04038	0.659831		0.834909	1.66124	0.598129		11.3263	0.458789	1.29728						0.00337615				1.5911	6.922	2.44086		1.61177
CCTACGGGAGGCAGCAGTTAGGAATATTCGTCAATGGAGGAAACTCTGAACGAGCAATGCCGCGTGAAGGATGACGGTCCTATGGATTGTAAACTTCTGTTGTTAGGGAAGAACGACTTAAGTAGGAAATGACTTAAGAGTGACGGTACCTTTCAAGAAAGCTCCGGCTAACTACGTGCCAGCAGCCGCGGTAATACGTAGGGAGCAAGCGTTATCCGGATTTATTGGGTGTAAAGGGTACGTAGGCGGCCTCATAAGTCTGTGGTTTAAGCCCGAAGCTTAACTTCGGTTCGCCACAGAAACTGTTTGGCTTGAGTATGGTAGAGGCAAGTGGAATTTCTAGTGTAGCGGTTAAATGCGTAGATATTAGAAGGAACACCAGTGGCGAAGGCGACTTGC…	>denovo62855	Bacteria;Firmicutes;Clostridia;Clostridiales	10.0072		0.0334053	3.27855	0.0251471		0.0400037	0.0771605	0.0544613		0.0104328	0.0128032	0.00290875			0.0109691	0.00365738		0.0688784	0.0287652	0.0435496		0.0227912	0.0426348	0.0906524						0.00849257	0.0100612	0.00963329		0.00677323	0.00229484			0.00168808	0.00419217	0.0072797		0.104677	0.13024	0.0832112		0.103379
CCTACGGGAGGCAGCAGTGGGGAATATTGCACAATGGGGGAAACCCTGATGCAGCGACGCCGCGTGAGTGAAGAAGTACTTCGGTATGTAAAGCTCTATCAGCAGGGAAGAAAGTGACGGTACCTGAGTAAGAAGCCCCGGCTAACTACGTGCCAGCAGCCGCGGTAATACGTAGGGGGCAAGCGTTATCCGGATTTACTGGGTGTAAAGGGAGTGTAGACGGCGATGCAAGTCTGGAGTGAAAGCCCGGTGCTCAACACCGGGACTGCTTTGGAAACTGTAAAGCTGGAGTGCCGGAGAGGTAAGCGGAATTCCTAGTGTAGCGGTGAAATGCGTAGATATTAGGAAGAACACCAGTGGCGAAGGCGGCTTACTGGACGGTAACTGACGTTGAGGCTC…	>denovo88573	Bacteria;Firmicutes;Clostridia;Clostridiales;Lachnospiraceae	9.54117		0.0400864	0.169628	0.160942		0.0430809	0.0308642	0.0181538		0.0104328	0.00995803	0.00727188			0.00548456			0.792102	0.0328745	0.0669994		0.546988	0.554253	0.404221						0.00283086	0.00804894	0.0064222		0.00225774	0.00458968	0.00394594		0.00675231	0.00209608			0.744954	0.916502	1.17684		1.60237
CCTACGGGAGGCAGCAGTGGGGGATATTGCACAATGGGCGCAAGCCTGATGCAGCGACGCCGCGTGAGGGAAGACGGTCTTCGGATTGTAAACCTCTGTCTTCGGGGACGATAATGACGGTACCCGAGGAGGAAGCCACGGCTAACTACGTGCCAGCAGCCGCGGTAATACGTAGGTGGCGAGCGTTGTCCGGAATTACTGGGTGTAAAGGGAGCGTAGGCGGGAAGACAAGTTGGACGTTAAATTTATCGGCTTAACCGGTAACCGCGTTCAAAACTGTTTTTCTTGAGTGAAGTAGAGGTTGGCGGAATTCCTAGTGTAGCGGTGAAATGCGTAGATATTAGGAGGAACACCAGTGGCGAAGGCGGCCAACTGGGCTTTAACTGACGCTGAGGCTCG…	>denovo72418	Bacteria;Firmicutes;Clostridia;Clostridiales;Ruminococcaceae;Acetanaerobacterium	9.22984		0.0267243	0.0250271	0.00502942		0.00923162	0.100309	0.0272306				0.00290875		0.20683	0.0137114	0.0219443		0.0229595	0.00821862	0.0401997		0.0303882	0.636477	0.0297221		0.026255	1.00897	0.0894637			0.00201223	0.215144								0.00363985		0.0471048	0.0385896	0.273408		1.02439
CCTACGGGAGGCAGCAGTGGGGAATATTGCACAATGGGGGAAACCCTGATGCAGCAACGCCGCGTGAAGGATGACGGTTTTCGGATTGTAAACTTCTGTTCTCGTTGACGAAGACAGTGACGGTAAACGAGGAGCAAGCCACGGCTAACTACGTGCCAGCAGCCGCGGTGATACGTAGGTGGCAAGCGTTGTCCGGAATTACTGGGTGTAAAGGGAGCGCAGGCGGGAGAGCAAGTCAGCTGTGAAAACCACGGGCTTAACCTGTGGACTGCAGTTGAAACTGTTCTTCTTGAGTGAAGTAGAGGTAAGCGGAATTCCGAGTGTAGCGGTGAAATGCGTAGAGATTCGGAGGAACACCAGTGGCGAAGGCGGCTTACTGGGCTTTAACTGACGCTGAGG…	>denovo129511	Bacteria;Firmicutes;Clostridia;Clostridiales;Ruminococcaceae	8.59913		1.6814	0.709102	1.40321		0.0430809	0.0154321	0.0635382		0.0229521	0.0213386	0.02327		0.0529101	0.0109691	0.00365738		0.0258294	0.0410931	0.0468996		0.0227912	0.00304535	0.0386387		0.477841	1.49071	1.29978		0.0169851	0.068416	1.26838		0.498961	0.520929	0.720134		0.194129	0.0188648	0.0121328		0.013957	0.00964739	0.0158497		0.0281942
CCTACGGGTGGCAGCAGTGGGGAATATTGCACAATGGGGGAAACCCTGATGCAGCGACGCCGCGTGAGTGATGAAGTATTTCGGTATGTAAAGCTCTATCAGCAGGGAAGAAAATGACGGTACCTGACTAAGAAGCCCCGGCTAACTACGTGCCAGCAGCCGCGGTAATACGTAGGGGGCAAGCGTTATCCGGATTTACTGGGTGTAAAGGGAGCGTAGACGGCTGTGCAAGTCTGGAGTGAAAGCCCGGGGCTCAACCCCGGGACTGCTTTGGAAACTGTACGGCTGGAGTGCTGGAGAGGCAAGCGGAATTCCTAGTGTAGCGGTGAAATGCGTAGATATTAGGAGGAACACCAGTGGCGAAGGCGGCTTGCTGGACAGTAACTGACGTTGAGGCTC…	>denovo22520	Bacteria;Firmicutes;Clostridia;Clostridiales;Lachnospiraceae;Clostridium XlVa	7.85994		0.0289513	0.0305887	0.035206		0.0184632	0.00771605	0.0363075		3.8935	0.211964	1.9925		0.0529101	0.0959798	0.0768049		0.0688784	0.0616396	0.0334997				0.0312082		0.005251	0.0213162	0.346352		0.0424628	0.0664037	0.0417443		0.410909	0.0963833	0.063135		0.0708992	0.0712669	0.0206258		0.0959542	0.0916502	0.14661		0.0610874
CCTACGGGAGGCAGCAGTGGGGAATATTGCACAATGGGGGAAACCCTGATGCAGCGACGCCGCGTGAGGGAAGAAGGTTTTCGGATTGTAAACCTCTGTCTTTGGTGACGATAATGACGGTAACCAAAGAGGAAGCTACGGCTAACTACGTGCCAGCAGCCGCGGTAATACGTAGGTGGCAAGCGTTGTCCGGAATTACTGGGTGTAAAGGGAGCGTAGGCGGGAAGACAAGTTGAATGTTTAAACTATCGGCTTAACCGGTAGTCGCGTTCAAAACTGTTTTTCTTGAGTGAAGTAGAGGCAGGCGGAATTCCTAGTGTAGCGGTGAAATGCGTAGATATTAGGAGGAACACCAGTGGCGAAGGCGGCCTGCTGGGCTTTAACTGACGCTGAGGCTCG…	>denovo70187	Bacteria;Firmicutes;Clostridia;Clostridiales;Ruminococcaceae	7.69726		0.00890809		0.0905296		0.00615441	0.00771605	0.00907688						0.00481	0.244063	0.241387		0.114797	0.00410931				0.00304535	0.0163472		0.278303	0.36806	0.350187		0.0424628	0.0301835	1.79821										0.771123	0.0506488	0.0832112		0.0234951
CCTACGGGAGGCAGCAGTGGGGAATATTGGGCAATGGGCGCAAGCCTGACCCAGCAACGCCGCGTGAAGGAAGAAGGCTTTCGGGTTGTAAACTTCTTTTGTCAGGGAACAGTAGAAGAGGGTACCTGACGAATAAGCTCCGGCTAACTACGTGCCAGCAGCCGCGGTAATACGTAGGGAGCGAGCGTTGTCCGGATTTACTGGGTGTAAAGGGCGTGCAGCCGGGCTGGTAAGTCAGATGTGAAATCCGTGGGCTCAACCCACGAACTGCATTTGAAACTGCTGGTCTTGAGTACCGGAGAGGTTATCGGAATTCCTTGTGTAGCGGTGAAATGCGTAGATATAAGGAAGAACACCAGTGGCGAAGGCGGATAACTGGACGGCAACTGACGGTGAGGC…	>denovo5017	Bacteria;Firmicutes;Clostridia;Clostridiales;Ruminococcaceae;Oscillibacter	7.52298		2.00209	0.347599	2.05703		0.175401	1.90586	0.154307		0.00208655	0.00142258	0.00290875						0.0229595	0.0945141	0.0435496		0.212717	0.00609069	0.0490415						0.0283086	0.0201223	0.0288999			0.0229484					0.00121328		0.092465	0.0289422	0.122836		0.0234951
CCTACGGGAGGCAGCAGTGGGGAATATTGCGCAATGGGGGCAACCCTGACGCAGCAACGCCGCGTGATTGAAGAAGGCCTTCGGGTTGTAAAGATCTTTAATCAGGGACGAAACATGACGGTACCTGAAGAATAAGCTCCGGCTAACTACGTGCCAGCAGCCGCGGTAATACGTAGGGAGCAAGCGTTATCCGGATTTACTGGGTGTAAAGGGCGCGCAGGCGGGCCGGCAAGTTGGGAGTGAAATCCGGGGGCTTAACCCCCGAACTGCTTTCAAAACTGCTGGTCTTGAGTGATGGAGAGGCAGGCGGAATTCCGTGTGTAGCGGTGAAATGCGTAGATATACGGAGGAACACCAGTGGCGAAGGCGGCCTGCTGGACATTAACTGACGCTGAGGCG…	>denovo82311	Bacteria;Firmicutes;Clostridia;Clostridiales;Ruminococcaceae;Butyricicoccus	6.73573		0.280605	1.41542	1.06121		0.446195	1.30401	0.353998		0.0375579	0.046945	0.0334507		0.586821	1.12159	0.117036		0.183676	0.258886	0.123949		1.78531	0.834425	1.16956		1.09746	0.784436	0.909974		6.59306	0.881359	3.01843		0.0158042	0.14228	0.0236756		0.021945	0.0146726	0.00363985		1.57539	0.34007	0.7806		1.85142
CCTACGGGAGGCAGCAGTCGGGAATATTGCGCAATGGAGGAAACTCTGACGCAGTGACGCCGCGTGCAGGAAGAAGGTTTTCGGATTGTAAACTGCTTTAGACAGGGAAGAAAAAGGACAGTACCTGTAGAATAAGCTCCGGCTAACTACGTGCCAGCAGCCGCGGTAATACGTAGGGAGCAAGCGTTATCCGGATTTATTGGGTGTAAAGGGTGCGTAGACGGGAAATCAAGTTGGTTGTGAAATCCCTCGGCTTAACTGAGGAACTGCAACCAAAACTAATTTTCTTGAGTGCTGGAGAGGAAAGTGGAATTCCTAGTGTAGCGGTGAAATGCGTAGATATTAGGAGGAACACCGGTGGCGAAGGCGACTTTCTGGACAGTAACTGACGTTGAGGCA…	>denovo15311	Bacteria;Firmicutes;Clostridia;Clostridiales	6.42257		0.169254	2.69737	6.42257		0.13232	0.0617284	0.181538		0.0104328	0.0213386	0.00872626			0.00822684	0.00731475		0.0717484	0.143826	0.147399				0.0252638						0.0452937	0.0321958	0.0610109		0.0079021	0.00917936	0.00394594		0.00506423	0.0104804	0.00363985		2.12495	0.108533	0.091136		0.00939805
CCTACGGGAGGCAGCAGTGGGGGATATTGCACAATGGAGGAAACTCTGATGCAGCGACGCCGCGTGAGGGAAGACGGTCTTCGGATTGTAAACCTCTGTCTTTAGGGACGAAAAAATGACGGTACCTAAGGAGGAAGCCACGGCTAACTACGTGCCAGCAGCCGCGGTAATACGTAGGTGGCAAGCGTTGTCCGGAATTACTGGGTGTAAAGGGAGCGTAGGCGGGGAGACAAGTTGAATGTTTAAACTATCGGCTCAACTGATAGTCGCGTTCAAAACTATCACTCTTGAGTGCAGTAGAGGTAGGCGGAATTCCTAGTGTAGCGGTGAAATGCGTAGATATTAGGAGGAACACCAGTGGCGAAGGCGGCCTACTGGGCTGTAACTGACGCTGAGGCT…	>denovo115333	Bacteria;Firmicutes;Clostridia;Clostridiales;Ruminococcaceae;Acetanaerobacterium	5.71234		1.89297	0.895414	1.63959		0.624673	1.03395	1.94245		0.0292117	0.0199161	0.0378138			0.00274228	0.0109721		0.215245	0.0452024	0.0602995		0.00759705	0.00913604	0.209541		1.79584	0.952124	2.02571		0.0226469	0.0221346	0.032111		0.0169331	0.0160639	0.0177567		0.0253212	0.025153	0.0181992		0.706572	0.880324	0.289258		0.253747
CCTACGGGAGGCAGCAGTCGGGAATATTGCGCAATGGAGGAAACTCTGACGCAGTGACGCCGCGTATAGGAAGAAGGTTTTCGGATTGTAAACTATTGTCGTTAGGGAAGAAAAAAGACAGTACCTAAGGAGGAAGCTCCGGCTAACTACGTGCCAGCAGCCGCGGTAATACGTAGGGAGCAAGCGTTATCCGGATTTATTGGGTGTAAAGGGTGCGTAGACGGGTAATCAAGTTAGTTGTGAAATCCCTTAGCTTAACTGAGGAACTGCAACTAAAACTGGTTATCTTGAGTACAGGAGAGGTAAGTGGAATTCCTAGTGTAGCGGTGAAATGCGTAGATATTAGGAGGAACACCAGTGGCGAAGGCGACTTACTGGACTGAAACTGACGTTGAGGCA…	>denovo53134	Bacteria;Firmicutes;Clostridia;Clostridiales	5.23902		0.0467675	0.0361503	0.00502942		0.0246177	0.0231481	0.0272306											0.0369838	0.0234498
CCTACGGGAGGCAGCAGTGGGGGATATTGCACAATGGGGGAAACCCTGATGCAGCGACGCCGCGTGAAGGAAGAAGGCCTTCGGGTTGTAAACTTCTGTCGTACGGGACGATAATGACGGTACCGTACAAGAAAGCCACGGCTAACTACGTGCCAGCAGCCGCGGTAAAACGTAGGTGGCAAGCGTTGTCCGGAATTACTGGGTGTAAAGGGAGCGCAGGCGGGAGAGCAAGTTGGGAGTGAAATCTATGGGCTCAACCCATAAATTGCTTTCAAAACTGCTTTTCTTGAGTAGTGCAGAGGTAGGCGGAATTCCCGGTGTAGCGGTGGAATGCGTAGATATCGGGAGGAACACCAGTGGCGAAGGCGGCCTACTGGGCACCAACTGACGCTGAGGCTC…	>denovo120827	Bacteria;Firmicutes;Clostridia;Clostridiales;Ruminococcaceae	5.23294		0.0556756	0.191875	1.55409		0.0584669	0.0771605	0.0907688		0.0584234	0.0682837	0.0901713			0.00822684				0.0616396	0.0602995				0.043097						0.0226469	0.0100612	0.0192666		0.0462838	0.057371	0.0355135		0.0303854	0.0482099	0.0218391						0.582679
CCTACGGGTGGCTGCAGTGGGGAATATTGCACAATGGGGGAAACCCTGATGCAGCGACGCCGCGTGAGCGAAGAAGTATTTCGGTATGTAAAGCTCTATCAGCAGGGAAGAAATTGACGGTACCTGACTAAGAAGCACCGGCTAAATACGTGCCAGCAGCCGCGGTAATACGTATGGTGCAAGCGTTATCCGGATTTACTGGGTGTAAAGGGAGCGTAGACGGAAGGGCAAGTCTGGAGTGAAAGCCCGGGGCTCAACCCCGGGACTGCTTTGGAAACTGTCCGTCTTGAGTGCCGGAGAGGTAAGCGGAATTCCTAGTGTAGCGGTGAAATGCGTAGATATTAGGAGGAACACCAGTGGCGAAGGCGGCTTACTGGACGGTAACTGACGTTGAGGCTC…	>denovo70621	Bacteria;Firmicutes;Clostridia;Clostridiales;Lachnospiraceae;Ruminococcus2	5.11819		0.204886	0.130697	0.171		0.464658	0.316358	0.771535		0.348454	0.803756	0.658832		1.12073	0.567652	1.44832		0.100448	0.156154	0.0837493		0.33427	0.408076	0.164958		0.514598	0.416377	0.39364		0.450106	0.158967	0.571575		0.296893	0.757298	0.516918		0.216074	0.167687	0.0679438		0.148293	0.113357	0.063399		0.272544
CCTACGGGAGGCAGCAGTGGGGGATATTGCACAATGGGGGGAACCCTGATGCAGCAACGCCGCGTGAGGGAAGAAGGTTTTCGGATTGTAAACCTCTGTCTTTGGTGACGATAATGACGGTAGCCAAGGAGGAAGCTCCGGCTAACTACGTGCCAGCAGCCGCGGTAATACGTAGGGAGCGAGCGTTGTCCGGAATTACTGGGTGTAAAGGGTGCGTAGGCGGGACAGCAAGTCAGGCGTGAAATCCATCGGCTTAACCGGTGAACTGCGCTTGAAACTGTAGTTCTTGAGTGAAGTAGAGGCAGGCGGAATTCCGAGTGTAGCGGTGAAATGCGTAGATATTCGGAGGAACACCAGTGGCGAAGGCGGCCTGCTGGGCTTTTACTGACGCTGAGGCAC…	>denovo100099	Bacteria;Firmicutes;Clostridia;Clostridiales;Ruminococcaceae;Clostridium IV	4.74726				0.035206										0.01443	0.0822684	0.0219443										0.068263	0.106581	0.0396197		0.0368011	0.0281713	0.639008							0.0209608			0.00348924
CCTACGGGAGGCAGCAGTGGGGAATATTGCACAATGGGGGAAACCCTGATGCAGCGATGCCGCGTGAGGGAAGAAGGTTTTCGGATTGTAAACCTCTGTTTTAAGTGAAGATAATGACGGTAGCTTAAGAGGAAGCCACGGCTAACTACGTGCCAGCAGCCGCGGTAATACGTAGGTGGCAAGCGTTGTCCGGAATTACTGGGTGTAAAGGGAGCGTAGGCGGGGATGCAAGTTGAATGTCAAAGCCAGGGGCTCAACCCCTGATCGCGTTCAAAACTGTATCTCTTGAGTGAAGTAGAGGCAGGCGGAATTCCTAGTGTAGCGGTGAAATGCGTAAATATTAGGAGGAACACCAGTGGCGAAGGCGGCCTGCTGGGCTTTAACTGACGCTGAGGCTCG…	>denovo6096	Bacteria;Firmicutes;Clostridia;Clostridiales;Ruminococcaceae	4.51469			0.0778621	0.663884		0.00615441		0.00907688		0.0396445	0.685682	0.0552663			0.0383919	0.029259		0.0631386						0.00743052		0.068263	0.115108	0.103522		0.00283086	0.00402447	0.00963329		0.533956	0.445199	0.0236756		0.143487	0.670747	0.0206258		0.594916	0.0434132	0.0713238		0.00469903
CCTACGGGTGGCTGCAGTGGGGAATATTGCACAATGGGGGAAACCCTGATGCAGCGACGCCGCGTGAGCGATGAAGTATTTCGGTATGTAAAGCTCTATCAGCAGGGAAGAAACTGACGGTACCTGACTAAGAAGCACCGGCTAAATACGTGCCAGCAGCCGCGGTAATACGTATGGTGCAAGCGTTATCCGGATTTACTGGGTGTAAAGGGAGCGTAGACGGACTTGCAAGTCTGAAGTGAAAGCCCGGAGCTCAACTCCGGGACTGCTTTGGAAACTGTAGGTCTAGAGTGCTGGAGAGGTAAGTGGAATTCCTAGTGTAGCGGTGAAATGCGTAGATATTAGGAGGAACACCAGTGGCGAAGGCGGCTTACTGGACAGTAACTGACGTTGAGGCTC…	>denovo124309	Bacteria;Firmicutes;Clostridia;Clostridiales;Lachnospiraceae;Ruminococcus2	4.23792		0.837361	4.23792	0.125736		0.283103	0.408951	0.335845		0.0959813	2.73561	0.225428		0.00481	0.00548456	0.00731475		0.163586	0.435587	0.401997		2.81091	0.0395895	0.028236		0.005251	0.00426324	0.00639027		0.0226469	0.0181101	0.0288999		0.0654746	0.119332	0.0729999		0.0320735	0.0335374	0.0145594		0.158761	0.205007	0.269446		0.300738
CCTACGGGAGGCAGCAGTGGGGAATATTGCACAATGGGGGAAACCCTGATGCAGCGACGCCGCGTGAAGGAAGAAGTATCTCGGTATGTAAACTTCTATCAGCAGGGAAGAAAATGACGGTACCTGACTAAGAAGCCCCGGCTAACTACGTGCCAGCAGCCGCGGTAATACGTATGGTGCAAGCGTTATCCGGATTTACTGGGTGTAAAGGGAGCGTAGACGGAGCAGCAAGTCTGGAGTGAAAACCCGGGGCTCAACCCCGGGACTGCTTTGGAAACTGTTGTTCTAGAGTGCTGGAGAGGTAAGTGGAATTCCTAGTGTAGCGGTGAAATGCGTAGATATTAGGAGGAACACCAGTGGCGAAGGCGGCTTACTGGACAGTAACTGACGTTGAGGCTC…	>denovo36040	Bacteria;Firmicutes;Clostridia;Clostridiales;Lachnospiraceae	4.16175		0.0601296	0.0444926	0.160942		0.089239	0.0925926	0.14523		0.254559	0.87773	0.461037		0.514671	0.323589	1.42272		0.043049	0.0410931	0.0167499		0.212717	0.322807	0.126319		0.189036	0.433429	0.649251		0.172682	0.11671	0.102755		0.2698	0.318983	0.347243		0.217762	0.232665	0.0230524		0.0122124	0.0217066	0.00792487		0.366524
CCTACGGGGGGCAGCAGTGGGGAATATTGGGCAATGGGCGCAAGCCTGACCCAGCAACGCCGCGTGAAGGAAGAAGGCTTTCGGGTTGTAAACTTCTTTTGTCAGGGACGAAGACGTGACGGTACCTGACGAATAAGCTCCGGCTAACTACGTGCCAGCAGCCGCGGTAATACGTAGGGAGCGAGCGTTATCCGGATTTACTGGGTGTAAAGGGCGTGTAGGCGGGCTGGCAAGTCAGATGTGAAAACCAGGGGCTCAACCTCTGGCCTGCATTTGAAACTGCTGGTCTTGAGTGCTGGAGAGGCAATCGGAATTCCGTGTGTAGCGGTGAAATGCGTAGATATACGGAGGAACACCAGTGGCGAAGGCGGATTGCTGGACAGTAACTGACGCTGAGGC…	>denovo48560	Bacteria;Firmicutes;Clostridia;Clostridiales;Ruminococcaceae;Flavonifractor	4.13283		0.287286	0.0250271	0.0603531		0.0184632	0.733025	0.0272306										0.00286993	0.0123279	0.0167499				0.00891663						0.00283086
CCTACGGGAGGCAGCAGTAGGGAATCTTCCGCAATGGACGAAAGTCTGACGGAGCAACGCCGCGTGAACGATGAAGGTTTTCGGATCGTAAAGTTCTGTTGTTAGGGAAGAACAAACTTCGTTTGAATAAGGCGGAGTCATGACGGTACCTAACGAGAAAGCCACGGCTAACTACGTGCCAGCAGCCGCGGTAATACGTAGGTGGCGAGCGTTATCCGGAATTATTGGGCGTAAAGCGCGCGCAGGTGGTTTCTTAAGTCTGATGTGAAAGCCTACGGCTTAACCGTAGAATTGCATTGGAAACTGGGGGACTTGAGTGCAGAAGAGGAAAGTGGAATTCCACGTGTAGCGGTGAAATGCGTAGAGATGTGGAGGAACACCGGTGGCGAAGGCGACTTT…	>denovo21025	Bacteria;Firmicutes;Bacilli;Bacillales;Bacillaceae 2	3.87915		0.0400864	0.798087	1.5893		0.255408	0.115741	0.0907688		0.0104328	0.0199161	0.0145438							0.0328745	0.0569495				0.0208055						0.00566171	0.0160979	0.0192666		0.00451549	0.0183587	0.00591891		0.0151927	0.0146726	0.00485313		0.013957	0.00964739	0.00792487		0.0140971
CCTACGGGAGGCAGCAGTGGGGGATATTGCACAATGGGGGAAACCCTGATGCAGCGACGCCGCGTGAGGGAAGAAGGTTTTCGGATTGTAAACCTCTGTCTTCAGTGACGAAATGAGACGGTAACTGAGGAGGAAGCCACGGCTAACTACGTGCCAGCAGCCGCGGTAATACGTAGGTGGCAAGCGTTGTCCGGAATTACTGGGTGTAAAGGGAGCGTAGGCGGGGAGACAAGTCGGGTGTTAAATCTATCGGCTCAACTGGTAGCAGCACTCGAAACTGTAACTCTTGAGTGAAGTAGAGGTAAGCGGAATTCCTAGTGTAGCGGTGAAATGCGTAAATATTAGGAGGAACACCAGTGGCGAAGGCGGCTTACTGGGCTTTAACTGACGCTGAGGCTC…	>denovo26993	Bacteria;Firmicutes;Clostridia;Clostridiales;Ruminococcaceae	3.84959		0.0734917	0.0611774	0.0603531		3.84959	1.26543	2.30553										0.0286993	0.053421	0.0334997				0.014861							0.00201223											0.0348924	0.0530606	0.0396244		0.211456
CCTACGGGAGGCAGCAGTGGGGAATATTGCACAATGGGGGAAACCCTGATGCAGCGACGCCGCGTGAGCGAAGAAGTATTTCGGTATGTAAAGCTCTATCAGCAGGGAAGAAAATGACGGTACCTGACTAAGAAGCCCCGGCTAACTACGTGCCAGCAGCCGCGGTAATACGTAGGGGGCAAGCGTTATCCGGATTTACTGGGTGTAAAGGGAGCGTAGACGGGACAGCAAGTCTGATGTGAAAGGCAGGGGCTCAACCCCTGGACTGCATTGGAAACTGTTGACCTGGAGTACCGGAGGGGTAAGCGGAATTCCTAGTGTAGCGGTGAAATGCGTAGATATTAGGAGGAACACCGGTGGCGAAGGCGGCTTACTGGACGGTAACTGACGTTGAGGCTC…	>denovo42928	Bacteria;Firmicutes;Clostridia;Clostridiales;Lachnospiraceae;Blautia	3.77836		0.0200432	0.0111232	0.0301765		0.0369265				0.0083462	0.00711288	0.0130894			0.00822684	0.0109721		0.0315693	0.00821862	0.0167499						0.010502				0.00283086		0.0032111		0.00564436	0.00688452	0.00394594		0.00337615	0.0104804			0.0471048	0.0506488	0.0673614		0.00469903
CCTACGGGAGGCAGCAGTGGGGAATATTGCACAATGGGGGAAACCCTGATGCAGCAACGCCGCGTGAAGGAAGACGGTTTTCGGATTGTAAACTTCTATCAATAGGGAAGAAAGAAATGACGGTACCTAAATAAGAAGCCCCGGCTAACTACGTGCCAGCAGCCGCGGTAATACGTAGGGGGCAAGCGTTATCCGGAATTACTGGGTGTAAAGGGAGAGTAGGCGGCATGGTAAGCAATATGTGAAAGCCTCGGGCTTAACCTGAGGATTGCATAATGAACTATCAAGCTAGAGTACAGGAGAGGAAAGCGGAATTCCTAGTGTAGCGGTGAAATGCGTAGATATTAGGAAGAACACCAGTGGCGAAGGCGGCTTTCTGGACTGAAACTGACGCTGAGG…	>denovo57356	Bacteria;Firmicutes;Clostridia;Clostridiales;Lachnospiraceae;Clostridium XlVb	3.76001		0.242745	0.311449	0.120706		0.0523125	0.0540123	0.226922		0.755331	0.167864	1.38602			0.00274228	0.00365738		0.00286993	0.0821862	0.150749		0.243106	0.511618	0.0549859			0.0127897	0.00766832		0.0481246	0.108661	0.0160555		0.274316	0.323573	0.359081		0.0793396	0.0586904	0.0958494		0.00523387	0.00482369	0.00396244		0.00939805
CCTACGGGAGGCAGCAGTGGGGAATATTGGGCAATGGGCGCAAGCCTGACCCAGCAACGCCGCGTGAAGGAAGAAGGCCCTCGGGTTGTAAACTTCTTTTGACAGGGACGAAACAAATGACGGTACCTGTCGAATAAGCCACGGCTAACTACGTGCCAGCAGCCGCGGTAATACGTAGGTGGCAAGCGTTATCCGGATTTACTGGGTGTAAAGGGCGTGTAGGCGGGCTGGCAAGTCAGATGTGAAAACCATGGGCTCAACCCATGGCCTGCATTTGAAACTGTTGGTCTTGAGTGCTGGAGAGGCAATCGGAATTCCGTGTGTAGCGGTGAAATGCGTAGATATACGGAGGAACACCAGTGGCGAAGGCGGATTGCTGGACAGTAACTGACGCTGAGG…	>denovo115332	Bacteria;Firmicutes;Clostridia;Clostridiales;Ruminococcaceae;Flavonifractor	3.72168		0.218248	1.40152	1.67983		0.156938	0.0694444	3.46737							0.00548456			0.0487889	0.131498	0.0468996		0.0455823	0.0578616	0.0534998		0.677379	0.625275	0.526558		0.0764331	0.060367	0.0738552										0.0575725	0.0554725	0.273408		0.108078
CCTACGGGAGGCAGCAGTAGGGAATTTTCGGCAATGGGGGAAACCCTGACCGAGCAACGCCGCGTGAGGGAAGAAGTATTTCGGTATGTAAACCTCTGTTATAAAGGAAGAACGGTATGAATAGGAAATGATTCATAAGTGACGGTACTTTATGAGAAAGCCACGGCTAACTACGTGCCAGCAGCCGCGGTAATACGTAGGTGGCGAGCGTTATCCGGAATCATTGGGCGTAAAGAGGGAGCAGGCGGCAATAGAGGTCTGCGGTGAAAGCCTGAAGCTAAACTTCAGTAAGCCGTGGAAACCAAATAGCTAGAGTGCAGTAGAGGATCGTGGAATTCCATGTGTAGCGGTGAAATGCGTAGATATATGGAGGAACACCAGTGGCGAAGGCGACGATCT…	>denovo36504	Bacteria;Firmicutes;Erysipelotrichia;Erysipelotrichales;Erysipelotrichaceae;Coprobacillus	3.51805																										0.05251
CCTACGGGAGGCAGCAGTGGGGAATATTGGGCAATGGGGGAAACCCTGACCCAGCAACGCCGCGTGAAGGAAGAAGGCCTTCGGGTTGTAAACTTCTTTTACCAGGGACGAAGGACGTGACGGTACCTGGAGAAAAAGCCACGGCTAACTACGTGCCAGCAGCCGCGGTAATACGTAGGTGGCAAGCGTTGTCCGGAATTACTGGGTGTAAAGGGCGTGTAGGCGGAGCTGCAAGTCAGATGTGAAATCTCCGGGCTTAACCCGGAAACTGCATTTGAAACTGTAGCCCTTGAGTATCGGAGAGGCAAGCGGAATTCCTAGTGTAGCGGTGAAATGCGTAGATATTAGGAGGAACACCAGTGGCGAAGGCGGCTTGCTGGACGACAACTGACGCTGAGG…	>denovo35007	Bacteria;Firmicutes;Clostridia;Clostridiales;Ruminococcaceae	3.40723		0.0645837	0.0973277	0.145853		0.326184	0.246914	1.0983							0.0383919	0.0548607		0.00286993	0.102733	0.0569495		0.00759705	0.0121814	0.0475554		0.010502	0.00994756	0.0102244		0.116065	0.108661	3.37165										0.0401263	0.0168829	0.00792487		0.0140971
CCTACGGGAGGCAGCAGTGGGGAATATTGCACAATGGGCGAAAGCCTGATGCAGCAACGCCGCGTGAGCGATGAAGGCCTTCGGGTCGTAAAGCTCTGTCCTCAAGGAAGATAATGACGGTACTTGAGGAGGAAGCCCCGGCTAACTACGTGCCAGCAGCCGCGGTAATACGTAGGGGGCTAGCGTTATCCGGAATTACTGGGCGTAAAGGGTGCGTAGGTGGTTTCTTAAGTCAGAGGTGAAAGGCTACGGCTCAACCGTAGTAAGCCTTTGAAACTGGGAAACTTGAGTGCAGGAGAGGAGAGTGGAATTCCTAGTGTAGCGGTGAAATGCGTAGATATTAGGAGGAACACCAGTTGCGAAGGCGGCTCTCTGGACTGTAACTGACACTGAGGCACG…	>denovo22287	Bacteria;Firmicutes;Clostridia;Clostridiales;Peptostreptococcaceae;Clostridium XI	3.30983		0.00445405	0.013904	0.00502942		0.313875	0.115741	0.0453844		0.0479907	0.0412547	0.0305419		0.0913901	0.699282	0.0475459		0.0315693				0.501405	0.127904	0.237777		0.042008		0.00383416		0.158528	0.0281713	0.0256888		0.062088	0.0849091	0.0927296		0.0540185	0.0440178	0.145594		0.50594	0.0771791	0.0792487		0.19266
CCTACGGGAGGCAGCAGTGGGGAATATTGCACAATGGGGGAAACCCTGATGCAGCGACGCCGCGTGAAGGAAGAAGTATCTCGGTATGTAAACTTCTATCAGCAGGGAAGAAAGTGACGGTACCTGACTAAGAAGCCCCGGCTAACTACGTGCCAGCAGCCGCGGTAATACGTAGGGGGCAAGCGTTATCCGGATTTACTGGGTGTAAAGGGAGCGTAGACGGAGCAGCAAGTCTGATGTGAAAGGCGGGGGCTCAACCCCCGGACTGCATTGGAAACTGCTGATCTTGAGTACCGGAGGGGTAAGCGGAATTCCTAGTGTAGCGGTGAAATGCGTAGATATTAGGAGGAACACCAGTGGCGAAGGCGGCTTACTGGACGGTAACTGACGTTGAGGCTC…	>denovo49821	Bacteria;Firmicutes;Clostridia;Clostridiales;Lachnospiraceae;Blautia	3.2172		0.191524	1.03723	1.15174		0.13232	0.185185	0.163384		0.0166924	0.0170709	0.0174525		0.01443	0.00822684	0.0146295		3.2172	0.739675	0.361797		1.64856	0.097451	0.153069		0.057761	0.312638	0.751495		0.0566171	0.0422569	0.0577998		0.00903098	0.0183587	0.0177567		0.0118165	0.0104804	0.00606642		0.434411	0.212243	0.388319		0.126874
CCTACGGGAGGCAGCAGTAGGGAATTTTCGGCAATGGGCGAAAGCCTGACCGAGCAACGCCGCGTGAAGGAAGAAGTCATTCGTGATGTAAACTTCTGTTATGAAGGAAGAACGGCAGATGGAGGGAATGCCATGTGCGTGACGGTACTTCATGAGGAAGCCACGGCTAACTACGTGCCAGCAGCCGCGGTAATACGTAGGTGGCGAGCGTTATCCGGAATCATTGGGCGTAAAGAGGGAGCAGGCGGCAGTGCAGGTCTGCGGTGAAAGACCGGAGCTAAACTTCGGTAAGCCGTGGAAACCGCACAGCTAGAGAGCATCAGAGGATCGCGGAATTCCATGTGTAGCGGTGAAATGCGTAGATATATGGAGGAACACCAGTGGCGAAGGCGGCGGTCT…	>denovo84275	Bacteria;Firmicutes;Erysipelotrichia;Erysipelotrichales;Erysipelotrichaceae	3.18763		0.0356324	0.127916	0.0452648		0.0369265	0.123457	0.0544613			0.123764	0.00727188		0.00481	0.00274228			0.0200895	0.0493117	0.0100499		0.843273	0.152267	0.00445831			0.0071054	0.0383416		0.00566171				0.0079021	0.112447	0.00197297		0.00337615		0.0606642		0.0314032	0.0241185	0.0237746		0.0140971
CCTACGGGTGGCAGCAGTGGGGAATATTGGACAATGGGCGAAAGCCTGATCCAGCGACGCCGCGTGAGCGAAGAAGTATTTCGGTATGTAAAGCTCTATCAGCAGGGAAGAAAATGACGGTACCTGACTAAGAAGCCCCGGCTAACTACGTGCCAGCAGCCGCGGTAATACGTAGGGGGCAAGCGTTATCCGGATTTACTGGGTGTAAAGGGAGCGTAGACGGTTAAGCAAGTCTGAAGTGAAAGCCCGGGGCTCAACCCCGGTACTGCTTTGGAAACTGTTTGACTTGAGTGCAGGAGAGGTAAGTGGAATTCCTAGTGTAGCGGTGAAATGCGTAGATATTAGGAGGAACACCAGTGGCGAAGGCGGCTTACTGGACTGTAACTGACGTTGAGGCTC…	>denovo4730	Bacteria;Firmicutes;Clostridia;Clostridiales;Lachnospiraceae;Clostridium XlVa	3.03479										0.0041731
CCTACGGGAGGCAGCAGTGAGGAATATTGGTCAATGGGCGATGGCCTGAACCAGCCAAGTAGCGTGAAGGATGACTGCCCTATGGGTTGTAAACTTCTTTTATAAAGGAATAAAGTCGGGTATGCATACCCGTTTGCATGTACTTTATGAATAAGGATCGGCTAACTCCGTGCCAGCAGCCGCGGTAATACGGAGGATCCGAGCGTTATCCGGATTTATTGGGTTTAAAGGGAGCGTAGGTGGATTGTTAAGTCAGTTGTGAAAGTTTGCGGCTCAACCGTAAAATTGCAGTTGAAACTGGCAGTCTTGAGTACAGTAGAGGTGGGCGGAATTCGTGGTGTAGCGGTGAAATGCTTAGATATCACGAAGAACTCCGATTGCGAAGGCAGCTCACTAGAC…	>denovo103540	Bacteria;Bacteroidetes;Bacteroidia;Bacteroidales;Bacteroidaceae;Bacteroides	2.98993
CCTACGGGGGGCTGCAGTGGGGAATATTGCACAATGGGGGAAACCCTGATGCAGCAACGCCGCGTGAGTGAAGAAGTATTTCGGTATGTAAAGCTCTATCAGCAGGGAAGATAATGACGGTACCTGACTAAGAAGCTCCGGCTAAATACGTGCCAGCAGCCGCGGTAATACGTATGGAGCAAGCGTTATCCGGATTTACTGGGTGTAAAGGGAGCGTAGACGGAGCAGCAAGTCTGGAGTGAAAACCCGGGGCTCAACCCCGGGACTGCTTTGGAAACTGTTGTTCTAGAGTGCTGGAGAGGTAAGTGGAATTCCTAGTGTAGCGGTGAAATGCGTAGATATTAGGAGGAACACCAGTGGCGAAGGCGGCTTACTGGACAGTAACTGACGTTGAGGCTC…	>denovo27197	Bacteria;Firmicutes;Clostridia;Clostridiales;Lachnospiraceae;Ruminococcus2	2.91407		0.0334053	0.0222463	0.17603		0.0276949	0.108025	0.0272306		0.273338	1.51647	0.397045		0.35594	0.257774	0.972862		0.0086098	0.00821862	0.0133999		0.144344	0.283217	0.102541		0.136526	0.378007	0.507387		0.0736023	0.0744527	0.0802774		0.17046	0.195062	0.280162		0.129982	0.159302	0.0254789		0.013957	0.00723554	0.00396244		0.559184
CCTACGGGAGGCAGCAGTAGGGAATCTTCGGCAATGGGGGCAACCCTGACCGAGCAACGCCGCGTGAGTGAAGAAGGTTTTCGGATCGTAAAGCTCTGTTGTAAGAGAAGAATGTGTGTGAGAGTGGAAAGTTCACACAGTGACGGTAACTTACCAGAAAGGGACGGCTAACTACGTGCCAGCAGCCGCGGTAATACGTAGGTCCCGAGCGTTGTCCGGATTTATTGGGCGTAAAGCGAGCGCAGGCGGTTTAATAAGTCTGAAGTTAAAGGCAGTGGCTTAACCATTGTTCGCTTTGGAAACTGTTAAACTTGAGTGCAGAAGGGGAGAGTGGAATTCCATGTGTAGCGGTGAAATGCGTAGATATATGGAGGAACACCGGTGGCGAAAGCGGCTCTC…	>denovo32661	Bacteria;Firmicutes;Bacilli;Lactobacillales;Streptococcaceae;Streptococcus	2.87851			0.00556158	0.00502942						0.724033	0.587524	0.219611			0.00548456	0.00731475		0.0114797				0.0227912	0.00913604	0.00297221						0.260439	0.00402447	0.0192666		0.0406394	0.107858	0.0769458		0.0320735	0.0398256	0.016986		0.00697849	0.0120592	0.0118873		0.00469903
CCTACGGGAGGCAGCAGTGGGGAATATTGCACAATGGGGGAAACCCTGATGCAGCGACGCCGCGTGAGTGAAGAAGTATTTCGGTATGTAAAGCTCTATCAGCAGGGAAGAAAATGACGGTACCTGACTAAGAAGCCCCGGCTAACTACGTGCCAGCAGCCGCGGTAATACGTAGGGGGCAAGCGTTATCCGGATTTACTGGGTGTAAAGGGAGCGTAGACGGTAATGCAAGTCTGGAGTGAAAACCCGGGGCTCAACCCCGGGACTGCTTTGGAAACTGTATAACTGGAGTGCCGGAGAGGTAAGCGGAATTCCTAGTGTAGCGGTGAAATGCGTAGATATTAGGAGGAACACCAGTGGCGAAGGCGACTTTCTGGACAGTAACTGACGTTGAGGCAC…	>denovo6750	Bacteria;Firmicutes;Clostridia;Clostridiales;Lachnospiraceae	2.81662		0.0267243	0.0834237	0.0402354		0.0184632	0.0694444	0.0181538		0.0104328	0.0241838	0.02327			0.0109691	0.00731475		0.0258294	0.0164372	0.0200998		0.00759705		0.0624164							0.00201223			0.0158042	0.0229484	0.00789188		0.0236331	0.0209608	0.00485313		0.0226801	0.0385896	0.0396244		0.0469903
CCTACGGGAGGCAGCAGTGGGGGATATTGCACAATGGGGGAAACCCTGATGCAGCAACGCCGCGTGAAGGATGAAGGTTTTCGGATTGTAAACTTCTGTTCTTAGTGACGATAATGACGGTAGCTAAGAAGAAAGCTCCGGCTAACTACGTGCCAGCAGCCGCGGTAATACGTAGGGAGCGAGCGTTGTCCGGATTTACTGGGTGTAAAGGGTGCGTAGGCGGCAGAGCAAGTCAGGCGTGAAAGCCATGGGCTTAACCCATGAACTGCGCTTGAAACTGTTCTGCTTGAGTGAAGTAGAGGCAGGCGGAATTCCCGGTGTAGCGGTGAAATGCGTAGAGATCGGGAGGAACACCAGTGGCGAAGGCGGCCTGCTGGGCTTTAACTGACGCTGAGGCAC…	>denovo61567	Bacteria;Firmicutes;Clostridia;Clostridiales;Ruminococcaceae;Clostridium IV	2.66842		0.570118	0.147382	0.171		0.360033	0.300926	0.335845		0.515378	0.169287	0.68792		0.38961	0.367466	0.13898		0.226725	0.110951	0.150749		0.144344	0.334988	0.170902		0.693132	0.801489	0.549563		0.956829	0.422569	2.66842		0.135465	0.0252433	0.124297		0.0557065	0.0586904	0.124968		0.422199	0.166417	0.289258		0.169165
CCTACGGGGGGCTGCAGTGGGGAATATTGCACAATGGGGGAAACCCTGATGCAGCGACGCCGCGTGAGTGAAGAAGTATTTCGGTATGTAAAGCTCTATCAGCAGGGAAGAGAATGACGGTACCTGACTAAGAAGCCCCGGCTAACTACGTGCCAGCAGCCGCGGTAATACGTAGGGGGCAAGCGTTATCCGGATTTACTGGGTGTAAAGGGAGCGTAGACGGCTGGACAAGTCTGAAGTGAAAGCCCAGGGCTCAACCCTGGGACTGCTTTGGAAACTGCCCGGCTAGAGTGCTGGAGAGGTAAGTGGAATTCCTAGTGTAGCGGTGAAATGCGTAGATATTAGGAGGAACACCAGTGGCGAAGGCGGCTTACTGGACAGTAACTGACGTTGAGGCTC…	>denovo127367	Bacteria;Firmicutes;Clostridia;Clostridiales;Lachnospiraceae;Clostridium XlVa	2.58931		0.0356324	0.102889	0.100588		0.0676986	0.177469	0.0544613			0.0227612	0.00436313						0.246814	2.12451	0.127299		0.00759705		0.0118888							0.00201223	0.0032111			0.00229484	0.00591891				0.00121328		0.109911	0.0892383	0.479455		0.0187961
CCTACGGGAGGCAGCAGTGGGGGATATTGCACAATGGGGGAAACCCTGATGCAGCAACGCCGCGTGAGGGAAGAAGGTTTTCGGATTGTAAACCTCTGTCCCCGGGGAAGATAATGACGGTACCCGGGGAGGAAGCTCCGGCTAACTACGTGCCAGCAGCCGCGGTAATACGTAGGGAGCGAGCGTTGTCCGGAATTACTGGGTGTAAAGGGTGCGTAGGCGGCTGTGCAAGTCAGGCGTGAAATGCAGGGGCTTAACCCCTGAGCTGCGTTTGAAACTGCACGGCTTGAGTGAAGTAGAGGTAGGCGGAATTCCCGGTGTAGCGGTGAAATGCGTAGAGATCGGGAGGAACACCAGTGGCGAAGGCGGCCTACTGGGCTTTAACTGACGCTGAGGCAC…	>denovo6500	Bacteria;Firmicutes;Clostridia;Clostridiales;Ruminococcaceae;Clostridium IV	2.58128		0.0111351	0.013904	0.0201177		0.00615441	0.00771605	0.00907688							0.00548456	0.00365738		0.0114797	0.0205465	0.0133999		0.0151941	0.118768	0.0014861		0.099769	0.0838437	0.023005			0.00804894	0.0032111										0.160505	0.0192948	0.0118873		0.0234951
CCTACGGGTGGCTGCAGTGGGGAATATTGGGCAATGGGCGCAAGCCTGACCCAGCAACGCCGCGTGAAGGAAGAAGGCTTTCGGGTTGTAAACTTCTTTTGTCAGGGAACAGTAGAAGAGGGTACCTGACGAATAAGCCACGGCTAACTACGTGCCAGCAGCCGCGGTAATACGTAGGTGGCAAGCGTTGTCCGGATTTACTGGGTGTAAAGGGCGTGCAGCCGGACTGGTAAGTCAGATGTGAAATCTGGAGGCTCAACCTCCAAACTGCATTTGAAACTGCTGGTCTTGAGTACCGGAGAGGTTATCGGAATTCCTTGTGTAGCGGTGAAATGCGTAGATATAAGGAAGAACACCAGTGGCGAAGGCGGATAACTGGACGGCAACTGACGGTGAGGC…	>denovo28143	Bacteria;Firmicutes;Clostridia;Clostridiales;Ruminococcaceae;Oscillibacter	2.49782		0.777231	0.80921	0.427501		0.113857	0.239198	0.0998457							0.0109691	0.00731475		0.86385	1.92727	0.0636495		0.0151941	0.0395895	0.0460693		0.010502				0.0254777	0.0221346	0.0353221										0.446623	0.853794	0.103023		0.187961
CCTACGGGAGGCAGCAGTGGGGAATATTGCACAATGGGCGGAAGCCTGATGCAGCGACGCCGCGTGAGTGAAGAAGTATCTCGGTATGTAAAGCTCTATCAGCAGGGAAGAAAATGACGGTACCTGACTAAGAAGCCCCGGCTAACTACGTGCCAGCAGCCGCGGTAATACGTAGGGGGCAAGCGTTATCCGGATTTACTGGGTGTAAAGGGAGCGTAGACGGCGACGCAAGTCTGGAGTGAAAGCCCGGGGCCCAACCCCGGGACTGCTTTGGAAACTGTGCTGCTGGAGTGCAGGAGAGGTAAGTGGAATTCCTAGTGTAGCGGTGAAATGCGTAGATATTAGGAGGAACACCAGTGGCGAAGGCGGCTTACTGGACTGTAACTGACGTTGAGGCTC…	>denovo113988	Bacteria;Firmicutes;Clostridia;Clostridiales;Lachnospiraceae;Clostridium XlVa	2.3495				0.0150883		0.00307721	0.0154321	0.00907688		0.00208655	0.00142258	0.00290875						0.00573987		0.00669994		0.0227912	0.0243628							0.0113234	0.0201223	0.0160555			0.00229484			0.00168808	0.00419217	0.00121328		0.0244247	0.00241185	0.0554741		0.00469903
CCTACGGGGGGCAGCAGTGGGGAATATTGGGCAATGGGCGCAAGCCTGACCCAGCAACGCCGCGTGAAGGAAGAAGGCTTTCGGGTTGTAAACTTCTTTTCTCAGGGACGAACAAATGACGGTACCTGAGGAATAAGCCACGGCTAACTACGTGCCAGCAGCCGCGGTAATACGTAGGTGGCAAGCGTTATCCGGATTTACTGGGTGTAAAGGGCGTGTAGGCGGGAAGGCAAGTCAGATGTGAAAACTATGGGCTCAACCCATAGCCTGCATTTGAAACTGTTTTTCTTGAGTGCTGGAGAGGCAATCGGAATTCCGTGTGTAGCGGTGAAATGCGTAGATATACGGAGGAACACCAGTGGCGAAGGCGGATTGCTGGACAGTAACTGACGCTGAGGC…	>denovo35108	Bacteria;Firmicutes;Clostridia;Clostridiales;Ruminococcaceae;Flavonifractor	2.32037		0.00445405		0.0150883		0.0923162		0.0181538		0.0041731		0.00290875						0.0086098	0.0164372			0.00759705												0.00112887								0.00174462	0.00723554	0.00396244		0.00469903
CCTACGGGAGGCAGCAGTGGGGGATATTGCGCAATGGGGGAAACCCTGACGCAGCAACGCCGCGTGAAGGACGAAGGTTTTCGGATTGTAAACTTCTTTTGTTAGGGACGAAGAAATGACGGTACCTGACGAATAAGCTCCGGCTAACTACGTGCCAGCAGCCGCGGTAATACGTAGGGAGCGAGCGTTGTCCGGAATTACTGGGTGTAAAGGGTGCGTAGGCGGCAGAGCAAGTCAGATGTGAAATACACGGGCTTAACCCGTGGGCTGCATTTGAAACTGTTCAGCTTGAGTGGAGCAGAGGCAGGCGGAATTCCCGGTGTAGCGGTGAAATGCGTAGAGATCGGGAGGAACACCAGTGGCGAAGGCGGCCTGCTGGGCTTTAACTGACGCTGAGGC…	>denovo118288	Bacteria;Firmicutes;Clostridia;Clostridiales;Ruminococcaceae	2.29433		0.0757188	0.013904			0.089239	0.277778	0.308614						0.00962001		0.0109721		0.00286993	0.00821862	0.0267998				0.00445831		0.194287	0.238741	0.127805														0.143059	0.00482369	0.0118873
CCTACGGGAGGCAGCAGTGGGGAATATTGCACAATGGGGGAAACCCTGATGCAGCAACGCCGCGTGAGTGATGAAGGTTTTCGGATCGTAAAGCTCTGTCTTTGGGGAAGATAATGACGGTACCCAAGGAGGAAGCCACGGCTAACTACGTGCCAGCAGCCGCGGTAATACGTAGGTGGCGAGCGTTATCCGGATTTACTGGGCGTAAAGGGAGCGTAGGCGGATGATTAAGTGGGATGTGAAATACCCGGGCTCAACTTGGGTGCTGCATTCCAAACTGGTTATCTAGAGTGCAGGAGAGGAGAGTGGAATTCCTAGTGTAGCGGTGAAATGCGTAGAGATTAGGAAGAACACCAGTGGCGAAGGCGACTCTCTGGACTGTAACTGACGCTGAGGCTC…	>denovo49386	Bacteria;Firmicutes;Clostridia;Clostridiales;Clostridiaceae 1;Clostridium sensu stricto	2.22346														0.01924				0.0229595				0.0607764	0.0609069																			0.0331478	0.0337659	0.0435868
CCTACGGGAGGCAGCAGTGGGGAATATTGCACAATGGGGGAAACCCTGATGCAGCAACGCCGCGTGAGCGAAGAAGTATTTCGGTATGTAAAGCTCTATCAGCAGGGAAGAAAGTGACGGTACCTGAGTAAGAAGCCCCGGCTAACTACGTGCCAGCAGCCGCGGTAATACGTAGGGGGCAAGCGTTATCCGGATTTACTGGGTGTAAAGGGAGCGTAGACGGCGGCGCAAGTCTGATGTGAAAGCCTGGGGCTCAACCCCGGAACTGCATTGGAAACTGTGCTGCTGGAGTGCCGGAGAGGTAAGCGGAATTCCTAGTGTAGCGGTGAAATGCGTAGATATTAGGAGGAACACCAGTGGCGAAGGCGGCTTACTGGACGGTAACTGACGTTGAGGCTC…	>denovo37140	Bacteria;Firmicutes;Clostridia;Clostridiales;Lachnospiraceae;Ruminococcus2	2.08925		0.0757188	0.0111232	0.00502942		0.00307721		0.00907688		0.0312983	0.0327193	0.0319963				0.00365738		0.00286993	0.00821862	0.00334997		0.00759705	0.00913604	0.0014861								0.0032111		0.00564436	0.897283	0.00591891		0.0151927	0.0146726	0.00121328		0.00348924	0.00241185
CCTACGGGTGGCAGCAGTGGGGGATATTGCACAATGGGGGAAACCCTGATGCAGCGACGCCGCGTGAGGGAAGAAGGTTTTCGGATTGTAAACCTCTGTCTTTAGTGACGAAGATGACGGTAGCTAAAGAGGAAGCCACGGCTAACTACGTGCCAGCAGCCGCGGTAATACGTAGGTGGCAAGCGTTGTCCGGAATTACTGGGTGTAAAGGGAGCGTAGGCGGGAAGACAAGTCGGGTGTCAAATCTATCGGCTCAACCGGTAGCAGCACTCGAAACTGCCTTTCTTGAGTGAAGTAGAGGTAAGCGGAATTCCTAGTGTAGCGGTGAAATGCGTAAATATTAGGAGGAACACCAGTGGCGAAGGCGGCTTACTGGGCTTTAACTGACGCTGAGGCTCG…	>denovo116258	Bacteria;Firmicutes;Clostridia;Clostridiales;Ruminococcaceae;Anaerotruncus	2.08895		2.08895	0.125136	1.79047		0.0430809	0.0231481	0.0363075											0.0205465	0.0535995										0.0311394	0.0060367	0.0256888											0.00723554
CCTACGGGAGGCAGCAGTGGGGAATATTGGGCAATGGGCGCAAGCCTGACCCAGCAACGCCGCGTGAAGGAAGAAGGCCCTCGGGTTGTAAACTTCTTTTATCAGGGACGAAGCAAGTGACGGTACCTGATGAATAAGCCACGGCTAACTACGTGCCAGCAGCCGCGGTAATACGTAGGTGGCGAGCGTTATCCGGATTTACTGGGTGTAAAGGGCGTGTAGGCGGGAAGGCAAGTCAGACGTGAAAACCACGGGCTCAACCTGTGGCCTGCGTTTGAAACTGTTTTTCTTGAGTGATGGAGAGGCAGGCGGAATTCCGTGTGTAGCGGTGAAATGCGTAGATATACGGAGGAACACCAGTGGCGAAGGCGGCCTGCTGGACATTAACTGACGCTGAGG…	>denovo5884	Bacteria;Firmicutes;Clostridia;Clostridiales;Ruminococcaceae;Pseudoflavonifractor	1.9666		0.140302	0.17519	0.125736		0.455427	0.146605	0.0635382				0.00145438		0.16354	0.0795261	0.563236		0.172196	0.0575303	0.00334997		0.0151941		0.0118888		0.015753	0.0810016	0.543173		0.0113234	0.00804894	0.0224777				0.00197297			0.00209608			0.676913	0.0988857	0.091136		0.00939805
CCTACGGGAGGCAGCAGTGGGGAATATTGCACAATGGGGGAAACCCTGATGCAGCGACGCCGCGTGAGTGAAGAAGTATTTCGGTATGTAAAGCTCTATCAGCAGGGAAGAGAATGACGGTACCTGACTAAGAAGCCCCGGCTAACTACGTGCCAGCAGCCGCGGTAATACGTAGGGGGCAAGCGTTATCCGGATTTACTGGGTGTAAAGGGAGCGTAGACGGCATAGCAAGTCTGAAGTGAAATACCCGGGCTCAACCCGGGAGCTGCTTTGGAAACTGTTAGGCTGGAGTGCTGGAGAGGCAAGCGGAATTCCTAGTGTAGCGGTGAAATGCGTAGATATTAGGAGGAACACCAGTGGCGAAGGCGGCTTGCTGGACAGTAACTGACGTTGAGGCTC…	>denovo92496	Bacteria;Firmicutes;Clostridia;Clostridiales;Lachnospiraceae	1.91955		0.0423134	0.472734	0.533119		0.0338493	0.0694444	0.0453844		0.0292117	0.0341418	0.04654			0.0987221	0.0512033		0.100448	0.0493117	0.0535995				0.0594442		0.031506				0.0283086	0.026159	0.0288999		0.0191908	0.0298329	0.0374864		0.0135046	0.0146726	0.00242657		0.0837419	0.279774	0.122836		0.502796
CCTACGGGCGGCTGCAGTGGGGAATATTGCACAATGGGGGAAACCCTGATGCAGCGACGCCGCGTGAGCGAAGAAGTATTTCGGTATGTAAAGCTCTATCAGCAGGGAAGAAACTGACGGTACCTGACTAAGAAGCACCGGCTAAATACGTGCCAGCAGCCGCGGTAATACGTATGGTGCAAGCGTTATCCGGATTTACTGGGTGTAAAGGGAGCGTAGACGGATGTGCAAGTCTGGAGTGAAAACCCGGGGCTTAACCCCGGGATTGCTTTGGAAACTGTTTAACTGGAGTGCAGGAGAGGTAAGCGGAATTCCTAGTGTAGCGGTGAAATGCGTAGATATTAGGAGGAACACCAGTGGCGAAGGCGGCTTACTGGACTGTAACTGACGTTGAGGCTC…	>denovo35264	Bacteria;Firmicutes;Clostridia;Clostridiales;Lachnospiraceae;Ruminococcus2	1.8905		0.262789	0.483858	0.206206		0.181555	0.200617	0.217845		0.0709427	0.254641	0.122168		0.0673401	0.159052	0.252359		0.100448	0.320526	0.127299		0.326673	0.587752	0.300193		0.346566	0.32827	0.451153		0.161359	0.273664	0.247255		0.0474126	0.321278	0.0749729		0.0995965	0.0943238	0.0121328		0.441389	0.49684	0.213972		0.803534
CCTACGGGTGGCTGCAGTGGGGAATATTGCACAATGGGGGAAACCCTGATGCAGCGACGCCGCGTGAGTGAAGAAGTATTTCGGTATGTAAAGCTCTATCAGCAGGGAAGAAAATGACGGTACCTGAGTAAGAAGCCCCGGCTAACTACGTGCCAGCAGCCGCGGTAATACGTAGGGGGCAAGCGTTATCCGGATTTACTGGGTGTAAAGGGAGCGTAGACGGAGAAGCAAGTCTGGAGTGAAAGCCCGGGGCTCAACCCCGGGACTGCTTTGGAAACTGTTTGTCTAGAGTGCCGGAGAGGTAAGCGGAATTCCTAGTGTAGCGGTGAAATGCGTAGATATTAGGAGGAACACCAGTGGCGAAGGCGGCTTACTGGACGGTAACTGACGTTGAGGCTC…	>denovo100195	Bacteria;Firmicutes;Clostridia;Clostridiales;Lachnospiraceae;Clostridium XlVa	1.82487		0.612431	0.725786	0.578384		0.261563	0.200617	0.199691		0.400618	0.782417	0.274877		0.942761	0.627982	0.727818		0.797842	0.862955	0.552745		0.357061	0.618205	0.297221		0.666877	0.399324	0.782169		0.167021	0.490985	0.131655		0.137722	0.458968	0.339351		0.49123	0.574327	0.156514		1.82487	0.877912	1.46214		0.606175
CCTACGGGAGGCAGCAGTAGGGAATATTGCACAATGGGGGAAACCCTGATGCAGCGACGCCGCGTGAGCGAAGAAGTATCTCGGTATGTAAAGCTCTATCAGCAGGGAAGAAGATGACGGTACCTGACTAAGAAGCACCGGCTAAATACGTGCCAGCAGCCGCGGTAATACGTATGGTGCAAGCGTTATCCGGATTTACTGGGTGTAAAGGGAGCGTAGACGGAAGAGCAAGTCTGGAGTGAAAGCCCGGGGCTCAACCCCGGGACTGCTTTGGAAACTGTTTATCTAGAGTGCCGGAGAGGCAAGCGGAATTCCTAGTGTAGCGGTGAAATGCGTAGATATTAGGAGGAACACCAGTGGCGAAGGCGGTCTGCTGGACAGCAACTGACGCTGAGGCGC…	>denovo99353	Bacteria;Firmicutes;Clostridia;Clostridiales;Lachnospiraceae	1.81945		0.0267243	0.0278079	0.0150883		0.0123088	0.00771605	0.0272306		0.0083462	0.0327193	0.00436313		0.02886	0.0246805	0.0621754		0.00286993	0.0164372	0.00669994		0.00759705	0.00304535			0.005251	0.00142108	0.0127805		0.00566171	0.00402447	0.00963329		0.00112887				0.00337615		0.0072797		0.00697849		0.00396244		0.00939805
TCTACGGGTGGCTGCAGTGAGGAATATTGGTCAATGGGCGCAGGCCTGAACCAGCCAAGTAGCGTGAAGGATGACTGCCCTATGGGTTGTAAACTTCTTTTATATGGGAATAAAGTTTTCCACGTGTGGAATTTTGTATGTACCATATGAATAAGGATCGGCTAACTCCGTGCCAGCAGCCGCGGTAATACGGAGGGTCCGAGCGTTATCCGGATTTATTGGGTTTAAAGGGAGCGTAGGTGGATTGTTAAGTCAGTTGTGAAAGGTTGCGGCTCAACCGTAAAATTGCAGTTGAAACTGGCAGTCTTGAGTACAGTAGAGGTGGGCGGAATTCGTGGTGTAGCGGTGAAATGCTTAGATATCACGAAGAACTCCGATTGCGAGGGCAGCTCACTAGAC…	>denovo80083	Bacteria;Bacteroidetes;Bacteroidia;Bacteroidales;Bacteroidaceae;Bacteroides	1.77569										0.00208655		0.00145438
CCTGCGGGAGGCAGCAGTGGGGAATATTGCACAATGGGGGAAACCCTGATGCAGCGACGCCGCGGGAGCGAAGAAGTATTTCGGTATGTAAAGCTCTATCAGCAGGGAAGAAATTGACGGTACCTGACTAAGAAGCACCGGCTAAATACGTGCCAGCAGCCGCGGTAATACGTATGGTGCAAGCGTTATCCGGATTTACTGGGTGTAAGGGGAGCGTAGACGGAGCAGCAAGTCTGGAGTGAAAACCCGGGGCTCAACCCCGGGACTGCTTTGGAAACTGTTGTTCTAGAGTGCAGGAGAGGTAAGCGGAATTCCTAGTGTAGCGGTGAAATGCGTAGATATTAGGAGGAACACCAGTGGCGAAGGCGGCTTACTGGACTGTAACTGACGTTGAGGCTC…	>denovo32643	Bacteria;Firmicutes;Clostridia;Clostridiales;Lachnospiraceae;Ruminococcus2	1.69745		0.0556756	0.0389311	0.0754413		0.00307721	0.0385802	0.00907688		0.0730293	1.23622	0.167253		0.0577201	0.131629	0.354766			0.0123279	0.00334997		0.0227912	0.103542	0.0297221		0.015753	0.166266	0.178927		0.00283086	0.0120734	0.0385332		0.101598	0.0413071	0.0828648		0.0489542	0.0691708	0.00485313		0.00697849		0.0118873		0.418213
CCTACGGGTGGCAGCAGTAGGGAATCTTCCACAATGGGCGCAAGCCTGATGGAGCAACACCGCGTGAGTGAAGAAGGGTTTCGGCTCGTAAAGCTCTGTTGTTAAAGAAGAACACGTATGAGAGTAACTGTTCATACGTTGACGGTATTTAACCAGAAAGTCACGGCTAACTACGTGCCAGCAGCCGCGGTAATACGTAGGTGGCAAGCGTTATCCGGATTTATTGGGCGTAAAGAGAGTGCAGGCGGTTTTCTAAGTCTGATGTGAAAGCCTTCGGCTTAACCGGAGAAGTGCATCGGAAACTGGATAACTTGAGTGCAGAAGAGGGTAGTGGAACTCCATGTGTAGCGGTGGAATGCGTAGATATATGGAAGAACACCAGTGGCGAAGGCGGCTACC…	>denovo82517	Bacteria;Firmicutes;Bacilli;Lactobacillales;Lactobacillaceae;Lactobacillus	1.69241
CCTACGGGAGGCAGCAGTGGGGAATATTGCGCAATGGGGGGAACCCTGACGCAGCAACGCCGCGTGCAGGAAGAAGGTCTTCGGATTGTAAACTGTTGTCGCGAGGGAAGAAGGAAGATGACGGTACCTCGTGAGAAAGTCACGGCTAACTACGTGCCAGCAGCCGCGGTAATACGTAGGTGACAAGCGTTGTCCGGATTTACTGGGTGTAAAGGGCGCGCAGGCGGGCAGGCAAGTCAGTCGTGAAATGCCGGGGCTCAACCCCGGAGCTGCGATTGAAACTGCAGGTCTTGAGTATCGGAGAGGAAAGCGGAATTCCCAGTGTAGCGGTGAAATGCGTAGATATTGGGAGGAACACCAGTGGCGAAGGCGGCTTTCTGGACGACAACTGACGCTGAG…	>denovo8118	Bacteria;Firmicutes;Clostridia;Clostridiales;Ruminococcaceae	1.59612		0.545621	0.0556158	0.0754413		0.0123088	0.00771605	0.390306						0.01443	0.0987221	0.0182869		0.00573987	0.0205465	0.0100499				0.00445831		0.010502	0.00568432	0.00127805		0.0311394	0.0221346	1.25875			0.00688452							0.0122124	0.00241185	0.0158497		0.00469903
CCTACGGGTGGCTGCAGTGGGGAATATTGCACAATGGGGGAAACCCTGATGCAGCGACGCCGCGTGAAGGAAGAAGTATCTCGGTATGTAAACTTCTATCAGCAGGGAAGAAAATGACGGTACCTGACTAAGAAGCCCCGGCTAACTACGTGCCAGCAGCCGCGGTAATACGTAGGGGGCAAGCGTTATCCGGATTTACTGGGTGTAAAGGGAGCGTAGACGGAAGGGCAAGTCTGGAGTGAAAACCCGGGGCTTAACCCCGGGATTGCTTTGGAAACTGTTTAACTGGAGTGCAGGAGAGGTAAGCGGAATTCCTAGTGTAGCGGTGAAATGCGTAGATATTAGGAGGAACACCAGTGGCGAAGGCGGCTTACTGGACTGTAACTGACGTTGAGGCTC…	>denovo72636	Bacteria;Firmicutes;Clostridia;Clostridiales;Lachnospiraceae;Clostridium XlVa	1.50712		0.095762	0.202998	0.105618		0.393883	0.339506	0.635382		0.0646831	0.125187	0.103261		0.0962001	0.109691	0.20847		1.2312	0.332854	0.609695		0.486211	0.593842	0.688067		0.220542	0.136424	0.270947		0.195329	0.734466	0.118811		0.0507992	0.300624	0.100621		0.0928442	0.0859395	0.00485313		0.254715	0.306305	0.253596		0.390019
CCTATGGGTGGCAGCAGTGAGGAATATTGGTCAATGGCCGAGAGGCTGAACCAGCCAAGTCGCGTGAGGGATGAAGGTTCTATGGATCGTAAATCTCTTTTATAAGGGAATAAAGTGCGGGACGTGTCCCGTTTTGTATGTACCTTATGAATAAGGATCGGCTAACTCCGTGCCAGCAGCCGCGGTAATACGGAGGATCCGAGCGTTATCCGGATTTATTGGGTTTAAAGGGTGCGTAGGCGGCCTTTTAAGTCAGCGGTGAAAGTCTGTGGCTCAACCATAGAATTGCCGTTTAAACTGGTGGGCTTGAGTATGTTTGAGGCAGGCGGAATGCGTGGTGTAGCGGTGAAATGCATAGATATCACGCAGAACCCCGATTGCGAAGGCAGCCTGCCAAGC…	>denovo103563	Bacteria;Bacteroidetes;Bacteroidia;Bacteroidales;Porphyromonadaceae;Parabacteroides	1.4478										0.00625965	0.0113806	0.00872626																						0.0135465	0.0206536	0.0236756		0.0202569	0.0209608	0.0133461
CCTACGGGCGGCTGCAGTGGGGAATATTGCACAATGGGGGAAACCCTGATGCAGCGACGCCGCGTGAAGGAAGAAGTATTTCGGTATGTAAACTTCTATCAGCAGGGAAGAAACTGACGGTACCTGACTAAGAAGCACCGGCTAAATACGTGCCAGCAGCCGCGGTAATACGTATGGTGCAAGCGTTATCCGGATTTACTGGGTGTAAAGGGAGCGTAGACGGAGAGGCAAGTCTGAAGTGAAAGCCCGGGGCTCAACCCCGGGACTGCTTTGGAAACTGCAGTTCTAGAGTGCCGGAGAGGTAAGCGGAATTCCTAGTGTAGCGGTGAAATGCGTAGATATTAGGAGGAACACCAGTGGCGAAGGCGGCTTACTGGACGGTGACTGACGTTGAGGCTC…	>denovo9358	Bacteria;Firmicutes;Clostridia;Clostridiales;Lachnospiraceae;Coprococcus	1.43962		0.0712647	0.119574	0.231353		0.32003	0.779321	0.980303		0.0146059	0.00853546	0.0130894				0.00731475		0.0545288	0.0493117	0.107199		0.00759705	0.0365441	0.0208055			0.00142108			0.0424628	0.0362202	0.0513776		0.00903098	0.057371	0.00789188			0.00419217	0.00242657		0.867077	0.0916502	0.0990609		0.00939805
CCTACGGGTGGCTGCAGTGGGGAATATTGGGCAATGGGCGCAAGCCTGGCCCAGCAACGCCGCGTGAAGGAAGAAGGCCCTCGGGTTGTAAACTTCTTTTAACAGGGACGAAGGAAGTGACGGTACCTGTTGAATAAGCCACGGCTAACTACGTGCCAGCAGCCGCGGTAATACGTAGGTGGCAAGCGTTATCCGGATTTACTGGGTGTAAAGGGCGTGTAGGCGGGATGGCAAGTCAGATGTGAAAACCACGGGCTCAACCTGTGGCCTGCATTTGAAACTGCTGTTCTTGAGTGATGGAGAGGCAGGCGGAATTCCGTGTGTAGCGGTGAAATGCGTAGATATACGGAGGAACACCAGTGGCGAAGGCGGATTGCTGGACAGTAACTGACGCTGAGG…	>denovo116670	Bacteria;Firmicutes;Clostridia;Clostridiales;Ruminococcaceae;Pseudoflavonifractor	1.41594		0.242745	0.108451	0.130765		0.584669	0.169753	0.0363075							0.00822684	0.0109721		0.0172196	0.0246558	0.0234498				0.0237777						0.00283086	0.00402447											0.249481	0.0241185	0.0198122		0.0187961
CCTACGGGAGGCAGCAGTGGGGAATATTGCACAATGGGGGAAACCCTGATGCAGCGACGCCGCGTGACTGAAGAAGTATTTCGGTATGTAAAGGTCTATCAGCAGGGAAGAAAGAAGACGGTACCTGACTAAGAAGCCCCGGCTAACTACGTGCCAGCAGCCGCGGTAATACGTAGGGGGCAAGCGTTATCCGGATTTACTGGGTGTAAAGGGAGCGCAGGTGGTATGGCAAGTCAGAAGTGAAAACCCGAGGCTTAACCACGGGATTGCTTTTGAAACTGTTAAACTAGAGTGCAGGAGGGGCAGGCGGAATTCCTGGTGTAGCGGTGAAATGCGTAGATATCAGGAGGAACACCGGTGGCGAAGGCGGCCTGCTGGACTGTAACTGACACTGAGGCT…	>denovo123417	Bacteria;Firmicutes;Clostridia;Clostridiales;Lachnospiraceae	1.40185		0.0155892	0.0472734	0.0150883		0.00615441	0.0231481	0.40846		0.0271252	0.0142258	0.0130894		0.23569	0.446992	0.0256016		0.045919	0.0123279	0.0133999		0.00759705	0.0274081	0.028236		0.063012	0.629539	0.377026		0.379335	0.0181101			0.212228	0.0963833	0.189405		0.08778	0.0880355	0.00606642		0.605384	0.0651199	0.0792487		0.164466
CCTACGGGAGGCAGCAGTGGGGGATATTGCACAATGGGGGAAACCCTGATGCAGCGACGCCGCGTGGAGGAAGAAGGTTTTCGGATTGTAAACTCCTGTCGTTAGGGACGAATCATGACGGTACCTAACAAGAAAGCACCGGCTAACTACGTGCCAGCAGCCGCGGTAAAACGTAGGGTGCAAGCGTTGTCCGGAATTACTGGGTGTAAAGGGAGCGCAGGCGGACCGGCAAGTTGGAAGTGAAATCTATGGGCTCAACCCATAAATTGCTTTCAAAACTGCTGGCCTTGAGTAGTGCAGAGGTAGGTGGAATTCCCGGTGTAGCGGTGGAATGCGTAGATATCGGGAGGAACACCAGTGGCGAAGGCGACCTACTGGGCACCAACTGACGCTGAGGCT…	>denovo13611	Bacteria;Firmicutes;Clostridia;Clostridiales;Ruminococcaceae;Subdoligranulum	1.39426		0.0111351	0.0917661	0.0201177			0.00771605								0.00548456	0.00731475		0.0114797	0.00410931				0.00609069	0.00297221																		0.00872311	0.0120592	0.00792487
CCTACGTGAGGCTGCAGTGGGGAATATTGCACAATGGGGGAAACCCTGATGCAGCGACGCCGCGTGAGTGAAGAAGTATTTCGGTATGTAAAGCTCTATCAGCAGGGAAGAAGAAAGACGGTACCTGACTAAGAAGCCCCGGCTAACTACGTGCCAGCAGCCGCGGTAATACGTAGGGGGCAAGCGTTATCCGGATTTACTGGGTGTAAAGGGAGCGTAGACGGCGAAGCAAGTCTGAAGTGAAAGCCCGGGGCTCAACCGCGGGACTGCTTTGGAAACTGTTTTGCTAGAGTGCTGGAGAGGTAAGCTGAATTCCTAGTGTATCGGTGAAATGCGTAGATATTAGGAGGAACACCAGTGGCGAAGGCGGCTTACTGGACAGTAACTGACGTTGAGGCT…	>denovo28290	Bacteria;Firmicutes;Clostridia;Clostridiales;Lachnospiraceae;Clostridium XlVa	1.37792										0.112674	0.0995803	0.155618		0.32227	0.230352	0.193841		0.00286993				0.00759705	0.00609069			0.021004	0.0483167	0.0434538						0.10047	0.114742	0.136135		0.0101285	0.0335374	0.00242657
CCTACGGGAGGCAGCAGTGGGGAATATTGGGCAATGGGCGCAAGCCTGACCCAGCAACGCCGCGTGAAGGAAGAAGGCTTTCGGGTTGTAAACTTCTTTTGTCAGGGAACAGTAGAAGAGGGTACCTGACGAATAAGCTCCGGCTAACTACGTGCCAGCAGCCGCGGTAATACGTAGGGAGCGAGCGTTGTCCGGATTTACTGGGTGTAAAGGGCGTGTAGGCGGGATTACAAGTCAGATGTGAAATTCCGGGGCTCAACCCCGGAACTGCATTTGAAACTGTAGTTCTTGAGTACTGGAGAGGCAGGCGGAATTCCTAGTGTAGCGGTGAAATGCGTAGATATTAGGAGGAACACCAGTGGCGAAGGCGGCCTGCTGGACAGCAACTGACGCTGAGGC…	>denovo107586	Bacteria;Firmicutes;Clostridia;Clostridiales;Ruminococcaceae;Flavonifractor	1.33507		0.0200432	0.0250271	0.251471		0.0215404	0.0231481	0.0272306		0.0104328	0.00853546	0.00290875				0.00365738			0.0246558	0.0167499												0.0032111		0.00564436	0.00688452	0.00394594		0.00506423	0.00628825
CCTACGGGTGGCTGCAGTGGGGAATATTGCACAATGGGGGGAACCCTGATGCAGCGACGCCGCGTGAAGGATGAAGTATTTCGGTACGTAAACTTCTATCAGCAGGGAAGAAAATGACGGTACCTGACTAAGAAGCCCCGGCTAACTACGTGCCAGCAGCCGCGGTAATACGTAGGGGGCAAGCGTTATCCGGATTTACTGGGTGTAAAGGGAGCGTAGACGGGCCAGCAAGTCTGATGTGAAAACCCGGGGCCCAACCCCGGGAGTGCATTGGAAACTGCGGGCCTGGAGTGCCGGAGAGGTAAGCGGAATTCCTAGTGTAGCGGTGAAATGCGTAGATATTAGGAGGAACACCAGTGGCGAAGGCGGCTTACTGGACGGTAACTGACGTTGAGGCTC…	>denovo68968	Bacteria;Firmicutes;Clostridia;Clostridiales;Lachnospiraceae;Ruminococcus2	1.33165										0.00208655
CCTACGGGGGGCTGCAGTGGGGAATATTGGACAATGGGGGAAACCCTGATCCAGCGACGCCGCGTGACTGAAGAAGTATTTCGGTATGTAAAGGTCTATCAGCAGGGAAGAAAATGACGGTACCTGACTAAGAAGCCCCGGCTAACTACGTGCCAGCAGCCGCGGTAATACGTAGGGGGCAAGCGTTATCCGGATTTACTGGGTGTAAAGGGAGCGTAGACGGATAGGCAAGTCTGGAGTGAAAGCCCGGGGCTCAACCCCGGGACTGCTTTGGAAACTGTTTATCTAGAGTGCTGGAGAGGTAAGTGGAATTCCTAGTGTAGCGGTGAAATGCGTAGATATTAGGAGGAACACCAGTGGCGAAGGCGGCTTACTGGACAGTAACTGACGTTGAGGCTC…	>denovo27781	Bacteria;Firmicutes;Clostridia;Clostridiales;Lachnospiraceae;Clostridium XlVa	1.29626		0.0645837	0.0305887	0.105618		0.116934	0.100309	0.0998457		0.137712	0.073974	0.526484		0.35113	0.233094	0.234072		0.111927	0.0821862	0.0971492		0.121553	0.289308	0.144152		0.15753	0.211741	0.181484		0.339703	0.177077	0.237621		0.118532	0.257022	0.309756		0.109725	0.0712669	0.016986		0.050594	0.0699436	0.0950985		0.202058
CCTACGGGAGGCAGCAGTGGGGGATATTGCACAATGGGGGAAACCCTGATGCAGCGACGCCGCGTGAGTGAAGAAGTATTTCGGTATGTAAAGCTCTATCAGCAGGGAAGAGAATGACGGTACCTGAGTAAGAAGCCCCGGCTAACTACGTGCCAGCAGCCGCGGTAATACGTAGGGGGCAAGCGTTATCCGGATTTACTGGGTGTAAAGGGAGCGTAGACGGCAAAGCAAGTCTGAAGTGAAAGCCCGGGGCTCAACCCCGGGACTGCTTTGGAAACTGTTCTGCTAGAGTGCTGGAGAGGTAAGCGGAATTCCTAGTGTAGCGGTGAAATGCGTAGATATTAGGAGGAACACCAGTGGCGAAGGCGGTCTGCTGGACAGCAACTGACGCTGAGGCGC…	>denovo135774	Bacteria;Firmicutes;Clostridia;Clostridiales;Lachnospiraceae	1.27973		0.249427	0.0917661	0.0603531		0.276949	0.100309	0.0181538		0.146059	0.0725514	0.167253		0.32227	0.0850107	0.0987492		0.157846	0.0493117	0.0368497		0.531794	0.423303	0.0326943		0.325562	0.257216	0.146976		0.00283086	0.0181101	0.375698		0.079021	0.263907	0.187432		0.0860919	0.0209608	0.0752235		0.0314032	0.079591	0.138685		0.0610874
CCTACGGGAGGCAGCAGTGGGGAATATTGCACAATGGGGGAAACCCTGATGCAGCGACGCCGCGTGAAGGAAGAAGTATCTCGGTATGTAAACTTCTATCAGCAGGGAAGAAAGTGACGGTACCTGACTAAGAAGCCCCGGCTAATTACGTGCCAGCAGCCGCGGTAATACGTAAGGGGCAAGCGTTATCCGGATTTACTGGGTGTAAAGGGAGCGTAGACGGAGAGGCAAGTCTGATGTGAAAGGCATGGGCTCAACCTGTGGACTGCATTGGAAACTGTTTTTCTAGAGTGCCGGAGAGGCAGGCGGAATTCCTAGTGTAGCGGTGAAATGCGTAGATATTAGGAGGAACACCAGTGGCGAAGGCGGCCTGCTGGACGGTAACTGACGTTGAGGCTC…	>denovo113399	Bacteria;Firmicutes;Clostridia;Clostridiales;Lachnospiraceae;Lachnospiracea_incertae_sedis	1.27709		0.66588	0.0778621	0.0754413		0.0276949	0.0925926	0.0363075		0.0041731	0.00711288	0.00436313						0.0286993	0.0657489	0.0468996											0.00201223	0.0032111		0.0079021	0.00688452	0.00394594		0.00844039		0.0800767		0.151782	0.0217066	0.0435868
CCTACGGGGGGCAGCAGTGGGGAATATTGCACAATGGGCGAAAGCCTGATGCAGCAACGCCGCGTGAGTGATGAAGGCCTTCGGGTCGTAAAACTCTGTCCTCAAGGAAGATAATGACGGTACTTGAGGAGGAAGCCCCGGCTAACTACGTGCCAGCAGCCGCGGTAATACGTAGGGGGCTAGCGTTATCCGGATTTACTGGGCGTAAAGGGTGCGTAGGCGGTCTTTCAAGTCAGGAGTGAAAGGCTACGGCTCAACCGTAGTAAGCTCTTGAAACTGGGAGACTTGAGTGCAGGAGAGGAGAGTGGAATTCCTAGTGTAGCGGTGAAATGCGTAGATATTAGGAGGAACACCAGTTGCGAAGGCGGCTCTCTGGACTGTAACTGACGCTGAGGCACG…	>denovo7392	Bacteria;Firmicutes;Clostridia;Clostridiales;Peptostreptococcaceae;Clostridium XI	1.24583			0.00278079											0.22607	0.0795261	0.296248								0.00297221		0.068263	0.035527	0.15081																		0.00469903
CCTACGGGAGGCAGCAGTGGGGAATATTGGGCAATGGGCGCAAGCCTGACCCAGCAACGCCGCGTGAAGGAAGAAGGCCCTCGGGTTGTAAACTTCTTTTGTCAGGGACGAAGCAAGTGACGGTACCTGACGAATAAGCCACGGCTAACTACGTGCCAGCAGCCGCGGTAATACGTAGGGGGCAAGCGTTATCCGGATTTACTGGGTGTAAAGGGAGCGTAGACGGTGAAGCAAGTCTGGAGTGAAAACCCGGGGCTTAACCCCGGGATTGCTTTGGAAACTGTTTAACTGGAGTGCAGGAGAGGTAAGCGGAATTCCTAGTGTAGCGGTGAAATGCGTAGATATTAGGAGGAACACCAGTGGCGAAGGCGGCTTACTGGACTGTAACTGACGTTGAGG…	>denovo99486	Bacteria;Firmicutes;Clostridia;Clostridiales;Lachnospiraceae	1.22475		0.146983	0.333695	0.165971		0.461581	0.246914	0.281383		0.0146059	0.036987	0.0189069		0.14911	0.224867	0.508375		0.307083	0.550647	0.217748		0.349464	0.703475	0.902066		0.939929	0.277111	0.360411		0.118896	0.330006	0.157344		0.0327373	0.013769	0.00394594		0.155303	0.0167687	0.0303321		0.406497	0.306305	0.233784		0.404116
CCTACGGGAGGCAGCAGTGGGGAATATTGGGCAATGGAGGCAACTCTGACCCAGCAACGCCGCGTGAAGGATGAAGGTTCTAGGATTGTAAACTTCTGTCGCAGAGGACGAAGAATGACGGTACTCTGTAAGAAAGCCCCGGCAAACTATGTGCCAGCAGCCGCGGTAATACATAGGGGGCGAGCGTTGTCCGGAATGACTGGGCGTAAAGGGAGTGTAGGTGGCTTGGTAAGTTATGAGTGAAAGCCCGCGGCTTAACTGCGGAACTGCTCATAAAACTGTCAGGCTTGAGTACAGGAGAGGTAAGCGGAATTCCTAGTGTAGCGGTGGAATGCGTAGATATTAGGAAGAACACCAGAGGCGAAGGCGGCTTACTGGACTGAAACTGACACTGAGGCT…	>denovo122248	Bacteria;Firmicutes	1.22068
CCTACGGGGGGCAGCAGTAGGGAATCTTCCACAATGGACGCAAGTCTGATGGAGCAACGCCGCGTGAGTGAAGAAGGGTTTCGGCTCGTAAAGCTCTGTTGTTAAAGAAGAACGTGGGTGAGAGTAACTGTTCACCCAGTGACGGTATTTAACCAGAAAGCCACGGCTAACTACGTGCCAGCAGCCGCGGTAATACGTAGGTGGCAAGCGTTATCCGGATTTATTGGGCGTAAAGCGAGCGCAGGCGGTCTTTTAAGTCTAATGTGAAAGCCTTCGGCTCAACCGAAGAAGTGCATTGGAAACTGGGAGACTTGAGTGCAGAAGAGGACAGTGGAACTCCATGTGTAGCGGTGAAATGCGTAGATATATGGAAGAACACCAGTGGCGAAGGCGGCTGTC…	>denovo57984	Bacteria;Firmicutes;Bacilli;Lactobacillales;Lactobacillaceae;Pediococcus	1.20078										0.0166924	0.0440999	0.133803														0.005251		0.00127805		0.0169851	0.144881	0.128444		0.00225774	0.0229484	0.00986485			0.00209608	0.00242657
CCTACGGGTGGCTGCAGTGAGGGATATTGGTCAATGGGGGAAACCCTGAACCAGCAACGCCGCGTGAGGGATGACGGTCTTCGGATTGTAAACCTCTGTCCTCTGTGAAGATAATGACGGTAGCAGAGGAGGAAGCTCCGGCTAACTACGTGCCAGCAGCCGCGGTAATACGTAGGGAGCAAGCGTTGTCCGGATTTACTGGGTGTAAAGGGTGCGTAGGCGGTTTTGCAAGTCAGGAGTGAAATCCATGGGCTTAACCCATGAACTGCTTTTGAAACTGCAAGACTTGAGTGAAGTAGAGGTAGGCGGAATTCCCGGTGTAGCGGTGAAATGCGTAGAGATCGGGAGGAACACCAGTGGCGAAGGCGGCCTACTGGGCTTTAACTGACGCTGAGGCAC…	>denovo115566	Bacteria;Firmicutes;Clostridia;Clostridiales;Ruminococcaceae;Clostridium IV	1.18141		0.904171	0.111232	0.26153		0.289257	0.0540123	0.0816919										0.152107	0.0369838	0.0234498							0.0142108	0.00639027		0.00566171	0.00201223					0.00197297						0.00872311	0.0410014	0.0198122
CCTACGGGAGGCAGCAGTGGGGGATATTGCACAATGGGGGAAACCCTGATGCAGCAACGCCGCGTGAGGGAAGACGGTTTTCGGATTGTAAACCTCTGTCCTTAGTGACGATAATGACGGTAGCTAAGGAGGAAGCCACGGCTAACTACGTGCCAGCAGCCGCGGTAATACGTAGGTGGCAAGCGTTGTCCGGAATTACTGGGTGTAAAGGGAGCGTAGGCGGGAAGGCAAGTCAGATGTGAAATCCACAGGCTTAACCTGTGGCGTGCATTTGAAACTGTTTTTCTTGAGTGAAGTAGAGGCAGGCGGAATTCCGAGTGTAGCGGTGAAATGCGTAGATATTCGGAGGAACACCAGTGGCGAAGGCGGCCTGCTGGGCTTTTACTGACGCTGATGCTC…	>denovo93735	Bacteria;Firmicutes;Clostridia;Clostridiales;Ruminococcaceae;Clostridium IV	1.18123		0.0623566	0.0222463	0.0301765		0.196941	0.123457	0.072615						0.00962001	0.0274228	0.0329164		0.0229595	0.0123279	0.0267998			0.185766	0.0104027		0.005251	0.00142108	0.00255611		0.0254777	0.0301835	0.744975										0.0191908	0.0361777	0.00792487		0.0328932
CCTACGGGAGGCAGCAGTGGGGAATATTGGGCAATGGGCGCAAGCCTGACCCAGCAACGCCGCGTGAAGGAAGAAGGCTTTCGGGTTGTAAACTTCTTTTCTCAGGGACGAAGGAAGTGACGGTACCTGAGGAACAAGCCACGGCTAACTACGTGCCAGCAGCCGCGGTAATACGTAGGTGGCAAGCGTTATCCGGATTTACTGGGTGTAAAGGGCGTGTAGGCGGGATGGTAAGTCAGATGTGAAAACCATGGGCTCAACCCATGGCCTGCATTTGAAACTGCTGTTCTTGAGTGATGGAGAGGCAGGCGGAATTCCGTGTGTAGCGGTGAAATGCGTAGATATACGGAGGAACACCAGTGGCGAAGGCGGCCTGCTGGACATTAACTGACGCTGAGG…	>denovo19628	Bacteria;Firmicutes;Clostridia;Clostridiales;Ruminococcaceae	1.12156		0.00445405	0.0111232	1.12156		0.00307721									0.00274228			0.00573987		0.00334997				0.0193194						0.0141543	0.0100612	0.0288999										0.00174462	0.0120592	0.00396244		0.00939805
CCTACGGGAGGCAGCAGTCGGGAATATTGCGCAATGGAGGGAACTCTGACGCAGTGACGCCGCGTATAGGAAGAAGGTTTTCGGATTGTAAACTATTGTCGTTAGGGAAGAGAAAGGACAGTACCTAAGGAGGAAGCTCCGGCTAACTACGTGCCAGCAGCCGCGGTAATACGTAGGGAGCGAGCGTTATCCGGAATTATTGGGTGTAAAGGGTGCGTAGACGGGAGAACAAGTTAGTTGTGAAATACCTCGGCTCAACTGAGGAACTGCAACTAAAACTGTACTTCTTGAGTGCAGGAGAGGTAAGTGGAATTCCTAGTGTAGCGGTGAAATGCGTAGATATTAGGAGGAACACCAGTGGCGAAGGCGACTTACTGGACTGTAACTGACGTTGAGGCA…	>denovo66416	Bacteria;Firmicutes;Clostridia;Clostridiales	1.09023			0.333695			0.00307721		0.00907688		0.00625965	0.0113806	0.0058175																						0.00564436	0.00917936	0.00591891		0.00506423	0.00628825	0.00363985		0.00174462
CCTACGGGTGGCTGCAGTGGGGAATATTGCACAATGGGGGAAACCCTGATGCAGCGACGCCGCGTGAGCGAAGAAGTATTTCGGTATGTAAAGCTCTATCAGCAGGGAAGAAACTGACGGTACCTGACTAAGAAGCACCGGCTAAATACGTGCCAGCAGCCGCGGTAATACGTATGGTGCAAGCGTTATCCGGATTTACTGGGTGTAAAGGGAGCGTAGACGGAGCAGCAAGTCTGGAGTGAAAACCCGGGGCTCAACCCCGGGACTGCTTTGGAAACTGTTGTTCTAGAGTGCTGGAGAGGTAAGTGGAATTCCTAGTGTAGCGGTGAAATGCGTAGATATTAGGAGGAACACCAGTGGCGAAGGCGGCTTACTGGACAGTAACTGACGTTGAGGCTC…	>denovo137260	Bacteria;Firmicutes;Clostridia;Clostridiales;Lachnospiraceae;Ruminococcus2	1.07494		0.0334053	0.013904	0.0603531		0.00615441	0.0154321			0.110587	0.284515	0.136711		0.0865801	0.0630725	0.387682						0.0227912	0.088315	0.0118888		0.05251	0.0667908	0.171259		0.019816	0.0241468	0.0032111		0.12982	0.0986782	0.138108		0.0573946	0.0524021	0.00121328		0.00174462	0.00241185	0.00396244		0.159767
CCTACGGGTGGCAGCAGTGGGGGATATTGCACAATGGGGGAAACCCTGATGCAGCAACGCCGCGTGAAGGAAGAAGGTCTTCGGATTGTAAACTTTTGTCCTCAGTGAAGATAATGACGGTAGCTGAGGAGGAAGCTCCGGCTAACTACGTGCCAGCAGCCGCGGTAATACGTAGGGAGCGAGCGTTGTCCGGATTTACTGGGTGTAAAGGGTGCGTAGGCGGACTGGCAAGTCAGTGGTGAAAACTATGGGCTTAACCCATAGACTGCCATTGAAACTGTTGGTCTTGAGTGAAGTAGAGGTAGGCGGAATTCCCGGTGTAGCGGTGAAATGCGTAGAGATCGGGAGGAACACCAGTGGCGAAGGCGGCCTACTGGGCTTTAACTGACGCTGAGGCAC…	>denovo3368	Bacteria;Firmicutes;Clostridia;Clostridiales;Ruminococcaceae;Clostridium IV	1.07157			0.00278079			0.00307721				0.0146059	0.0113806	0.02327			0.00548456				0.00410931															0.0101598	0.0160639	0.0177567		0.00337615	0.0104804	0.00363985
CCTACGGGGGGCTGCAGTGGGGAATATTGCACAATGGGGGAAACCCTGATGCAGCGACGCCGCGTGAAGGAAGAAGTATCTCGGTATGTAAACTTCTATCAGCAGGGAAGAAAATGACGGTACCTGACTAAGAAGCCCCGGCTAACTACGTGCCAGCAGCCGCGGTAATACGTAGGTGGCAAGCGTTATCCGGATTTACTGGGTGTAAAGGGCGTGTAGGCGGGATTGCAAGTCAGATGTGAAAACCACGGGCTCAACCTGTGGCCTGCATTTGAAACTGCAGTTCTTGAGTACTGGAGAGGCAGACGGAATTCCTAGTGTAGCGGTGAAATGCGTAGATATTAGGAGGAACACCAGTGGCGAAGGCGGTCTGCTGGACAGCAACTGACGCTGAGGCGC…	>denovo87108	Bacteria;Firmicutes;Clostridia;Clostridiales;Lachnospiraceae	1.06234		0.0623566	0.100108	0.0754413		0.427732	0.393519	0.317691		0.0438176	0.0569031	0.0945345		0.841751	0.356496	0.709531		0.106188	0.283542	0.150749		0.212717	0.338033	0.313568		0.535602	0.318322	0.345074		0.223638	0.237444	0.199088		0.0959541	0.087204	0.0335405		0.108037	0.0356334	0.0388251		0.0383817	0.0868265	0.0435868		0.178563
CTTACGGGTGGCAGCAGTGGGGGATATTGCACAATGGGGGAAACCCTGATGCAGCGACGCCGCGTGAGTGAAGAAGTATCTCGGTATGTAAAGCTCTATCAGCAGGGAAGAAAGTGACGGTACCTGACTAAGAAGCACCGGCTAAATACGTGCCAGCAGCCGCGGTAATACGTATGGTGCAAGCGTTATCCGGATTTACTGGGTGTAAAGGGAGCGTAGACGGAGAAGCAAGTCTGGAGTGAAAGCCCGGGGCTCAACCCCGGGACTGCTTTGGAAACTGTTTGTCTAGAGTGCCGGAGAGGTAAGCGGAATTCCTAGTGTAGCGGTGAAATGCGTAGATATTAGGAGGAACACCAGTGGCGAAGGCGGCTTATTGGGCGGTAACTGACGTTGAGGCTC…	>denovo135277	Bacteria;Firmicutes;Clostridia;Clostridiales;Lachnospiraceae	1.01866		0.0868539	0.0278079	0.0603531		0.00307721	0.00771605	0.0181538		0.619705	0.0355644	0.0363594		0.20202	0.274228	0.380367		0.0229595	0.0493117	0.0234498		0.0303882	0.0182721	0.0014861		0.036757	0.0582643	0.126527		0.0339703	0.0281713	0.0353221		0.0711189	0.0298329	0.136135		0.0844039	0.132053	0.0934228		0.364626	0.079591	0.0950985		0.0657864
TCTACGGGTGGCTGCAGTGGGGAATATTGCACAATGGGGGAAACCCTGATGCAGCGACGCCGCGTGAGCGAAGAAGTATCTCGGTATGTAAAGCTCTATCAGCAGGGAAGAAACTGACGGTATCTGACTAAGAAGCACCGGCTAAATACGTGCCAGCAGCCGCGGTAATACGTATGGTGCAAGCGTTATCCGGATTTACTGGGTGTAAAGGGAGCGTAGACGGAGCAGCAAGTCTGGAGTGAAAACCCGGGGCTCAACCCCGGGACTGCTTTGGAAACTGTTGTTCTAGAGTGCTGGAGAGGTAAGTAGAATTCCTAGTGTAGCTGTTAAATGCGTAGATATTAGGAGGAACACCAGTGGCGAAGGCGGCTTACTGGACAGTAACTGACGTTGAGGCTC…	>denovo78735	Bacteria;Firmicutes;Clostridia;Clostridiales;Lachnospiraceae;Ruminococcus2	1.01444		0.0111351	0.013904	0.0452648		0.00923162				0.112674	0.106693	0.191978		0.17316	0.0932375	0.416941				0.00669994		0.0227912	0.0761336	0.00891663		0.036757	0.102318	0.209601		0.0226469	0.0181101	0.0288999		0.135465	0.0826143	0.175594		0.0455781	0.0544982	0.00606642						0.108078
CCTACGGGTGGCAGCAGTGGGGAATATTGCACAATGGGGGAAACCCTGATGCAGCGACGCCGCGTGAGTGAAGAAGTATTTCGGTATGTAAAGCTCTATCAGCAGGGAAGAAAATGACGGTACCTGACTAAGAAGCCCCGGCTAACTACGTGCCAGCAGCCGCGGTAATACGTAGGGGGCAAGCGTTATCCGGATTTACTGGGTGTAAAGGGAGCGTAGACGGCAAGGCAAGTCTGAAGTGAAAGCCCGGGGCTTAACCGCGGGACTGCTTTGGAAACTGTCTGGCTGGAGTGCCGGAGAGGTAAGCGGAATTCCCAGTGTAGCGGTGAAATGCGTAGATATTGGGAAGAACACCAGTGGCGAAGGCGGCTTTCTGGACTGTAACTGACGCTGAGGCTC…	>denovo65417	Bacteria;Firmicutes;Clostridia;Clostridiales;Lachnospiraceae;Coprococcus	1.00159										0.00208655		0.00145438			0.0246805	0.00365738												0.00127805							0.00229484	0.00197297		0.00168808						0.00396244
CCTACGGGTGGCTGCAGTGGGGAATATTGCACAATGGGGGAAACCCTGATGCAGCGACGCCGCGTGAGTGAAGAAGTATTTCGGTATGTAAAGCTCTATCAGCAGGGAAGAAGATGACGGTACCTGAGTAAGAAGCCCCGGCTAACTACGTGCCAGCAGCCGCGGTAATACGTATGGTGCAAGCGTTATCCGGATTTACTGGGTGTAAAGGGAGCGTAGACGGATGGGCAAGTCTGAAGTGAAAGCCCGGGGCTCAACCCCGGGACTGCTTTGGAAACTGTTCATCTGGAGTGCTGGAGAGGTAAGTGGAATTCCTAGTGTAGCGGTGAAATGCGTAGATATTAGGAGGAACACCAGTGGCGAAGGCGGCTTACTGGACAGTAACTGACGTTGAGGCTC…	>denovo46418	Bacteria;Firmicutes;Clostridia;Clostridiales;Lachnospiraceae;Ruminococcus2	0.999796		0.097989	0.291983	0.140824		0.147706	0.108025	0.308614		0.352627	0.192048	0.0567207		0.11544	0.115176	0.204813		0.289863	0.320526	0.234498		0.296285	0.682157	0.386387		0.294056	0.103739	0.187874		0.101911	0.259578	0.0834885		0.0169331	0.114742	0.0611621		0.08778	0.0691708	0.0121328		0.572236	0.366601	0.416056		0.465204
CCTACGGGGGGCAGCAGTGGGGAATATTGCACAATGGGGGAAACCCTGATGCAGCGACGCCGCGTGAGCGAAGAAGTATTTCGGTATGTAAAGCTCTATCAGCAGGGAAGAAACTGACGGTACCTGACTAAGAAGCACCGGCTAAATACGTGCCAGCAGCCGCGGTAATACGTATGGTGCAAGCGTTATCCGGATTTACTGGGTGTAAAGGGAGCGTAGACGGAGCAGCAAGTCTGGAGTGAAAACCCGGGGCTTAACCGCGGGACTGCTTTGGAAACTGTCTGGCTGGAGTGCCGGAGAGGTAAGCGGAATTCCTAGTGTAGCGGTGAAATGCGTAGATATTAGGAGGAACACCAGTGGCGAAGGCGGCTTACTGGACGGTAACTGACGTTGAGGCTC…	>denovo29012	Bacteria;Firmicutes;Clostridia;Clostridiales;Lachnospiraceae;Ruminococcus2	0.989153		0.0690377	0.0278079	0.0502942		0.0215404	0.0385802	0.00907688		0.0500772	0.155061	0.15271		0.13468	0.238578	0.259674		0.00286993	0.0287652	0.00669994		0.0303882	0.0730883	0.014861		0.042008	0.0966335	0.113747		0.0339703	0.0201223	0.0963329		0.0677323	0.0826143	0.100621		0.0573946	0.0419217	0.00849298		0.0348924	0.00964739	0.0277371		0.0845825
CCTACGGGAGGCAGCAGTGGGGAATATTGCACAATGGGGGGAACCCTGATGCAGCGACGCCGCGTGAGGGAAGAAGGTTTTCGGATTGTAAACCTCTGTCCTTGGTGACGATAATGACGGTAGCCAAGGAGGAAGCCACGGCTAACTACGTGCCAGCAGCCGCGGTAATACGTAGGTGGCAAGCGTTGTCCGGAATTACTGGGTGTAAAGGGAGCGTAGGCGGGAAAGCAAGTTGGGAGTGAAATGTATGGGCTCAACCCATAAACTGCTTTCAAAACTGTTTTTCTTGAGTGAAGTAGAGGCAGGCGGAATTCCTAGTGTAGCGGTGAAATGCGTAAATATTAGGAGGAACACCAGTGGCGAAGGCGGCCTGCTGGGCTTTAACTGACGCTGAGGCTC…	>denovo87517	Bacteria;Firmicutes;Clostridia;Clostridiales;Ruminococcaceae;Clostridium IV	0.984381		0.162573	0.731348	0.0402354		0.0461581	0.100309	0.163384				0.00436313						0.123407	0.0862955	0.0669994		0.0455823	0.0548162	0.0178333						0.288747	0.034208	0.0224777		0.00112887	0.190472			0.00506423		0.00121328		0.287863	0.364189	0.0832112		0.0657864
CCTACGGGAGGCAGCAGTGGGGAATATTGGGCAATGGGCGCAAGCCTGACCCAGCAACGCCGCGTGAAGGAAGAAGGCCCTCGGGTTGTAAACTTCTTTTGTCAGGGACGAAGCAAGTGACGGTACCTGACGAATAAGCCACGGCTAACTACGTGCCAGCAGCCGCGGTAATACGTAGGGGGCAAGCGTTATCCGGATTTACTGGGTGTAAAGGGAGCGTAGACGGAAGGGCAAGTCTGGAGTGAAAGCCCGGGGCTCAACCCCGGGACTGCTTTGGAAACTGTCCGTCTTGAGTGCCGGAGAGGTAAGCGGAATTCCTAGTGTAGCGGTGAAATGCGTAGATATTAGGAGGAACACCAGTGGCGAAGGCGGCTTACTGGACGGTAACTGACGTTGAGG…	>denovo88070	Bacteria;Firmicutes;Clostridia;Clostridiales;Lachnospiraceae	0.977985		0.0200432	0.0305887	0.0150883		0.252331	0.162037	0.43569		0.0125193	0.0199161	0.058175		0.788841	0.326331	0.888743		0.0401791	0.0821862	0.0200998		0.0911646	0.124859	0.0787636		0.388574	0.152056	0.0907418		0.110403	0.0503059	0.134866		0.10047	0.0367175	0.00986485		0.0962204	0.00838434	0.0424649		0.00872311	0.0385896	0.00396244		0.0375922
CCTACGGGGGGCAGCAGTGAGGGATATTGGTCAATGGGGGAAACCCTGAACCAGCAACGCCGCGTGAGGGATGACGGCCTTCGGGTTGTAAACCTCTGTCCTCTGTGAAGATAATGACGGTAGCAGAGGAGGAAGCTCCGGCTAACTACGTGCCAGCAGCCGCGGTAATACGTAGGGAGCGAGCGTTGTCCGGATTTACTGGGTGTAAAGGGTGCGTAGGCGGATCTGCAAGTCAGTAGTGAAATCCCAGGGCTTAACCCTGGAACTGCTATTGAAACTGTGGGTCTTGAGTGAGGTAGAGGCAGGCGGAATTCCCGGTGTAGCGGTGAAATGCGTAGAGATCGGGAGGAACACCAGTGGCGAAGGCGGCCTGCTGGGCCTTAACTGACGCTGAGGCAC…	>denovo39709	Bacteria;Firmicutes;Clostridia;Clostridiales;Ruminococcaceae;Clostridium IV	0.977809		0.0111351		0.0201177		0.0400037	0.0231481	0.0453844						0.02886	0.00274228			0.00286993		0.0167499		0.00759705	0.0182721	0.0326943		0.21004	0.252952	0.139308				0.0032111						0.00337615				0.00174462
CCTACGGGAGGCAGCAGTGGGGGATATTGCACAATGGGGGAAACCCTGATGCAGCGACGCCGCGTGGAGGAAGAAGGTTTTCGGATTGTAAACTCCTGTCGTAAGGGACGATAATGACGGTACCTTACAAGAAAGCCACGGCTAACTACGTGCCAGCAGCCGCGGTAAAACGTAGGTGGCAAGCGTTGTCCGGAATTACTGGGTGTAAAGGGAGCGCAGGCGGGCTGTCAAGTTGGAAGTGAAATCTATGGGCTCAACCCATAAATTGCTTTCAAAACTGATGGTCTTGAGTAGTGCAGAGGTAGGCGGAATTCCCGGTGTAGCGGTGGAATGCGTAGATATCGGGAGGAACACCAGTGGCGAAGGCGGCCTACTGGGCACCAACTGACGCTGAGGCTC…	>denovo13816	Bacteria;Firmicutes;Clostridia;Clostridiales;Ruminococcaceae	0.977343		0.0601296	0.0778621	0.0100588		0.00307721				0.00208655	0.00142258							0.0315693	0.279433			0.0227912										0.0032111										0.0575725	0.0458251	0.0752863
CCTACGGGAGGCAGCAGTGGGGGATATTGCACAATGGGGGAAACCCTGATGCAGCAACGCCGCGTGAAGGAAGAAGGTCTTCGGATTGTAAACTTCTGTCCTCAGGGAAGATAATGACGGTACCTGAGGAGGAAGCTCCGGCTAACTACGTGCCAGCAGCCGCGGTAATACGTAGGGAGCAAGCGTTGTCCGGATTTACTGGGTGTAAAGGGTGCGTAGGCGGTTTGGTAAGTCAGAAGTGAAATCCATGGGCTTAACCCATGAACTGCTTTTGAAACTATCGAACTTGAGTGAAGTAGAGGTAGGCGGAATTCCCGGTGTAGCGGTGAAATGCGTAGAGATCGGGAGGAACACCAGTGGCGAAGGCGGCCTACTGGGCTTTAACTGACGCTGAGGCAC…	>denovo31321	Bacteria;Firmicutes;Clostridia;Clostridiales;Ruminococcaceae;Clostridium IV	0.965143		0.00222702	0.00278079	0.0251471		0.0430809	0.108025	0.14523				0.00145438							0.00821862	0.00669994			0.0213174	0.0326943		0.152279	0.260058	0.200654			0.00402447	0.0064222						0.00168808		0.00121328		0.00697849				0.00469903
CTTACGGGTGGCAGCAGTGGGGAATATTGGGCAATGGGCGCAAGCCTGACCCAGCAACGCCGCGTGAAGGATGAAGGCTTTCGGGTTGTAAACTTCTTTTATCAGGGACGAAACAAATGACGGTACCTGATGAATAAGCCACGGCTAACTACGTGCCAGCAGCCGCGGTAATACGTAGGTGGCAAGCGTTATCCGGATTTACTGGGTGTAAAGGGCGTGTAGGCGGGACTGCAAGTCAGATGTGAAAACTATGGGCTCAACCCATAGCCTGCATTTGAAACTGTAGTTCTTGAGTGCTGGAGAGGCAATCGGAATTCCGTGTGGAGCGGTGAAATGCGTAGATATACGGAGGAACACCAGTGGCGAAGGCGGCCTGCTGGACATTAACTGACGCTGAGG…	>denovo69218	Bacteria;Firmicutes;Clostridia;Clostridiales;Ruminococcaceae;Pseudoflavonifractor	0.963166		0.0757188	0.122355	0.0553236		0.963166	0.0308642	0.0181538										0.0373091	0.1767	0.0200998				0.00743052						0.00283086	0.00402447	0.0032111										0.00174462	0.00964739	0.00396244
CCTACGGGTGGCTGCAGTGGGGAATATTGCACAATGGGGGAAACCCTGATGCAGCGACGCCGCGTGAGTGAAGAAGTATTTCGGTATGTAAAGCTCTATCAGCAGGGAAGAAAATGACGGTACCTGACTAAGAAGCCCCGGCTAACTACGTGCCAGCAGCCGCGGTAATACGTAGGGGGCAAGCGTTATCCGGATTTACTGGGTGTAAAGGGAGCGTAGACGGCGAAGCAAGTCTGAAGTGAAAGCCCGGGGCTCAACCGCGGGACTGCTTTGGAAACTGTTTTGCTAGAGTGCTGGAGAGGTAAGTGGAATTCCTAGTGTAGCGGTGAAATGCGTAGATATACGGAGGAACACCAGTGGCGAAGGCGGATTGCTGGACAGTAACTGACGCTGAGGCGC…	>denovo15247	Bacteria;Firmicutes;Clostridia;Clostridiales;Lachnospiraceae;Clostridium XlVa	0.951437		0.00445405	0.00834237					0.0272306		0.100154	0.0881997	0.114896		0.524291	0.180991	0.186526		0.0143497	0.0123279	0.00334997		0.00759705	0.0213174			0.026255	0.139266	0.0741271		0.00566171		0.0032111		0.107243	0.139985	0.0729999		0.0135046	0.0125765	0.00363985		0.00348924	0.00241185
CCTACGGGGGGCTGCAGTCGGGAATATTGCGCAATGGAGGAAACTCTGACGCAGTGACGCCGCGTGCAGGAAGAAGGTTTTCGGATTGTAAACTGCTTTAGACAGGGAAGAAACAAGACAGTACCTGTAAAATAAGCTCCGGCTAACTACGTGCCAGCAGCCGCGGTAATACGTAGGGAGCAAGCGTTATCCGGATTTATTGGGTGTAAAGGGTGCGTAGACGGGAGAGCAAGTTAGTTGTGAAATCCCTCGGCTTAACTGAGGAACTGCAACTAAAACTATTCTTCTTGAGTGCTGGAGAGGAAAGTGGAATTCCTAGTGTAGCGGTGAAATGCGTAGATATTAGGAGGAACACCAGTGGCGAAGGCGACTTTCTGGACAGTAACTGACGTTGAGGCA…	>denovo31057	Bacteria;Firmicutes;Clostridia;Clostridiales	0.943323		0.00890809	0.0361503	0.00502942		0.015386	0.0154321	0.00907688			0.00142258	0.00145438							0.0123279	0.00334997											0.00201223				0.00458968							0.00872311		0.00396244
CCTACGGGTGGCAGCCGTAGGGAATTTTGCACAATGGGGGAAACCCTGATGCAGCGACGCCGCGTGAGCGAAGAAGTATCTCGGTATGTAAAGCTCTATCAGCAGGGAAGAAGATGACGGTACCTGGCTAAGAAGCACCGGCTAAATACGTGCCAGCAGCCGCGGTAATACGTATGGTGCAAGCGTTCTCCGGATTTACTGGGTGTAAAGGGAGCGTAGACGGACGAGCAAGTCTGGAGTGAAAGCCCGGGGCCCAACCCCGGGACTGCTTTGGAAACTGTTTATCTAGAGTGCCGGAGAGGCAAGCGGAATTCCTAGTGTAGCGGTGAAATGCGTAGATATTAGGAGGAACACCAGTGGCGAAGGCGGCTTGCTGGACGGTAACTGACGTTGAGGCTC…	>denovo118470	Bacteria;Firmicutes;Clostridia;Clostridiales;Lachnospiraceae	0.931145		0.00445405				0.00307721		0.0453844											0.00410931	0.00669994		0.00759705																				0.00174462	0.00241185
CCTACGGGAGGCAGCAGTGGGGGATATTGCACAATGGGGGAAACCCTGATGCAGCAACGCCGCGTGAGGGAAGAAGGTTTTCGGATTGTAAACCTCTGTCCTTGGTGACGATAATGACGGTAGCCAAGGAGGAAGCTCCGGCTAACTACGTGCCAGCAGCCGCGGTAATACGTAGGGAGCGAGCGTTGTCCGGATTTACTGGGTGTAAAGGGTGCGTAGGCGGCCATGCAAGTCAGGTGTGAAAACCCGGGGCTTAACCCCGGGACTGCATTTGAAACTGTGTGGCTTGAGTGAAGTAGAGGCAGGCGGAATTCCCGGTGTAGCGGTGAAATGCGTAGAGATCGGGAGGAACACCAGTGGCGAAGGCGGCCTGCTGGGCTTTAACTGACGCTGAGGCAC…	>denovo33339	Bacteria;Firmicutes;Clostridia;Clostridiales;Ruminococcaceae;Clostridium IV	0.928007		0.0133621	0.00834237	0.0402354		0.166169	0.0925926	0.254153		0.0083462	0.00569031	0.333052		0.23088	0.194702	0.204813		0.0401791	0.00821862	0.0870993			0.210129	0.213999		0.162781	0.272847	0.186596		0.0254777	0.0865261	0.928007		0.00451549	0.00229484			0.0253212	0.0356334	0.00242657		0.144804	0.0217066	0.00792487		0.0469903
CCTACGGGTGGCAGCAGTAGGGAATCTTCGGCAATGGACGAAAGTCTGACCGAGCAACGCCGCGTGAGTGAAGAAGGTTTTCGGATCGTAAAACTCTGTTGTTAGAGAAGAACAAGGATGAGAGTAGAACGTTCATCCCTTGACGGTATCTAACCAGAAAGCCACGGCTAACTACGTGCCAGCAGCCGCGGTAATACGTAGGTGGCAAGCGTTGTCCGGATTTATTGGGCGTAAAGCGAGCGCAGGCGGTTTCTTAAGTCTGATGTGAAAGCCCCCGGCTCAACCGGGGAGGGTCATTGGAAACTGGGAGACTTGAGTGCAGAAGAGGAGAGTGGAATTCCATGTGTAGCGGTGAAATGCGTAGATATATGGAGGAACACCAGTGGCGAAGGCGGCTCT…	>denovo80923	Bacteria;Firmicutes;Bacilli;Lactobacillales;Enterococcaceae;Enterococcus	0.924494		0.00668107		0.00502942		0.015386		0.00907688		0.00625965	0.00284515	0.0159981			0.0137114			0.0114797	0.00410931	0.0468996		0.0151941	0.00304535	0.0014861		0.010502	0.0383692	0.0383416		0.0113234	0.0925628	0.0545887		0.00112887	0.00458968			0.00168808		0.064304		0.0157016	0.0289422	0.0277371		0.0422912
CCTACGGGTGGCAGCAGTGGGGAATATTGGTCAATGGGCGCAGGCCTGAACCAGCCAAGTAGCGTGAAGGATGACTGCCCTGTGGGTTGTAAACTTCTTTTATATGGGAATAAAGTTTTACACGTGTGGAATTTTGTATGTACCATATGAATAAGGATCGGCTAACTCCGTGCCAGCAGCCGCGGTAATACGGAGGATCCGAGCGTTATCCGGACTTATTGGGTTTAAAGGGAGAGTAGGTGGATTGTTAAGTCAGTTGTGAAAGTTTGCGGCTCAACCGTAAAATTGCAGTTGAAACTGGCAGTCTTGAGTACAGTAGAGGTGGGCGGAATTCGTGGTGTAGCGGTGAAATGCTTAGATATCACGAAGAACTCCGATTGCGAAGGCAGCTCACTAGAC…	>denovo29296	Bacteria;Bacteroidetes;Bacteroidia;Bacteroidales;Bacteroidaceae;Bacteroides	0.914657												0.00145438
CCTACGGGAGGCAGCAGTGGGGGATATTGCACAATGGGGGAAACCCTGATGCAGCAACGCCGCGTGAAGGAAGAAGGTCTTCGGATTGTAAACTTCTGTCCTCAGGGAAGATAATGACGGTACCTGAGGAGGAAGCTCCGGCTAACTACGTGCCAGCAGCCGCGGTAATACGTAGGGAGCGAGCGTTGTCCGGATTTACTGGGTGTAAAGGGTGCGTAGGCGGATAGGCAAGTCAGTGGTGAAATCTATGGGCTTAACCCATAAACTGCCATTGAAACTGTTTATCTTGAGTGGAGTAGAGGCAGGCGGAATTCCCGGTGTAGCGGTGAAATGCGTAGAGATCGGGAGGAACACCAGTGGCGAAGGCGGCCTGCTGGGCTTTAACTGACGCTGAGGCAC…	>denovo33933	Bacteria;Firmicutes;Clostridia;Clostridiales;Ruminococcaceae;Clostridium IV	0.914117		0.00222702	0.00556158	0.035206		0.0676986	0.447531	0.353998				0.00145438						0.0143497		0.00334997				0.014861		0.021004	0.149213	0.100966			0.0060367	0.0064222			0.0458968			0.00168808				0.0261693	0.00964739	0.00396244		0.00469903
CCTACGGGGGGCAGCAGTGGGGGATATTGCACAATGGGGGAAACCCTGATGCAGCAACGCCGCGTGTGGGAAGAAGGTTTTCGGATTGTAAACCACTGTTCTCAGGGACGATAATGACGGTACCTGAGGAGAAAGCTCCGGCTAACTACGTGCCAGCAGCCGCGGTAATACGTAGGGAGCGAGCGTTGTCCGGATTTACTGGGTGTAAAGGGTGCGTAGGCGGCTCTGCAAGTCAGTCGTGAAAACCATGGGCTCAACCCGTGGACTGCGATTGAAACTGTGGAACTTGAGTGAAGTAGAGGCAGGCGGAATTCCCGGTGTAGCGGTGAAATGCATAGAGATCGGGAGGAACACCAGTGGCGAAGGCGGCCTGCTGGGCTTTAACTGACGCTGAGGCAC…	>denovo119946	Bacteria;Firmicutes;Clostridia;Clostridiales;Ruminococcaceae;Clostridium IV	0.889968		0.0111351	0.127916	0.286677		0.0123088	0.00771605	0.0181538		0.00208655		0.00145438			0.00822684	0.00365738		0.0143497	0.00821862	0.00334997										0.00283086	0.0060367	0.00963329			0.00917936	0.00197297						0.0261693	0.0192948	0.0356619
CCTACGGGTGGCAGCAGTGAGGAATATTGGTCAATGGCCGTAAGGCTGAACCAGCCAAGTAGCGTGAAGGACGACGGCCCTACGGGTTGTAAACTTCTTTTATAAGGGAATAAAGTTGCGTACGCGTACGCATTTGCATGTACCTTATGAATAAGCATCGGCTAACTCCGTGCCAGCAGCCGCGGTAATACGGAGGATGCGAGCGTTATCCGGATTTATTGGGTTTAAAGGGTGCGTAGGTGGTAATTTAAGTCAGCGGTGAAAGTTTGTGGCTCAACCATAAAATTGCCGTTGAAACTGGGTTACTTGAGTGTGTTTGAGGTAGGCGGAATGCGTGGTGTAGCGGTGAAATGCATAGATATCACGCAGAACTCCAATTGCGAAGGCAGCTTACTAAAC…	>denovo126067	Bacteria;Bacteroidetes;Bacteroidia;Bacteroidales;Porphyromonadaceae;Parabacteroides	0.887993
CCTACGGGAGGCAGCAGTAGGGAATTTTCGGCAATGGGGGAAACCCTGACCGAGCAACGCCGCGTGAAGGAAGAAGGTTTTCGGATTGTAAACTTCTGTTATAAAGGAAGAACGGCGGCTACAGGAAATGGTAGCCGAGTGACGGTACTTTATTAGAAAGCCACGGCTAACTACGTGCCAGCAGCCGCGGTAATACGTAGGTGGCAAGCGTTATCCGGAATTATTGGGCGTAAAGAGGGAGCAGGCGGCAGCAAGGGTCTGTGGTGAAAGCCTGAAGCTTAACTTCAGTAAGCCATAGAAACCAGGCAGCTAGAGTGCAGGAGAGGATCGTGGAATTCCATGTGTAGCGGTGAAATGCGTAGATATATGGAGGAACACCAGTGGCGAAGGCGACGATCT…	>denovo36967	Bacteria;Firmicutes;Erysipelotrichia;Erysipelotrichales;Erysipelotrichaceae;Clostridium XVIII	0.884507						0.015386		0.00907688		0.0083462	0.00995803	0.833358						0.00573987	0.00821862							0.005251	0.00142108	0.00766832						0.00112887	0.00688452	0.00394594		0.00506423	0.00628825	0.00242657
CCTACGGGAGGCAGCAGTGGGGAATATTGCACAATGGGGGAAACCCTGATGCAGCGACGCCGCGTGAGTGAAGAAGTATTTCGGTATGTAAAGCTCTATCAGCAGGGAAGAAAATGACGGTACCTGAGTAAGAAGCCCCGGCTAACTACGTGCCAGCAGCCGCGGTAATACGTAGGGAGCAAGCGTTATCCGGATTTATTGGGTGTAAAGGGTACGTAGGCGGCCTCATAAGTCTGTGGTTTAAGCCCGAAGCTTAACTTCGGTTCGCCACAGAAACTGTTTGGCTTGAGTATGGTAGAGGCAAGTGGAATTTCTAGTGTAGCGGTTAAATGCGTAGATATTAGAAGGAACACCAGTGGCGAAGGCGACTTGCTGGGCCATTACTGACGCTGAGGTACG…	>denovo38490	Bacteria;Firmicutes;Clostridia;Clostridiales;Lachnospiraceae	0.883107		0.0489945	0.503323	0.0100588		0.0553897	0.0771605	0.0544613		0.0104328		0.00727188			0.00548456	0.0146295		0.126277	0.0780768	0.103849		0.0227912	0.0548162	0.145638						0.0141543	0.0100612	0.0032111			0.00229484							0.143059	0.197771	0.253596		0.117476
CCTACGGGTGGCTGCAGTGGGGAATATTGCACAATGGGGGAAACCCTGATGCAGCGACGCCGCGTGAAGGAAGAAGTATCTCGGTATGTAAACTTCTATCAGCAGGGAAGAAAATGACGGTACCTGACTAAGAAGCCCCGGCTAACTACGTGCCAGCAGCCGCGGTAATACGTAGGGGGCAAGCGTTATCCGGATTTACTGGGTGTAAAGGGAGCGTAGACGGCAAAGCAAGTCTGAAGTGAAAGCCCGGGGCTCAACCCCGGGACTGCTTTGGAAACTGTTCTGCTAGAGTGCTGGAGAGGTAAGCGGAATTCCTAGTGTAGCGGTGAAATGCGTAGATATTAGGAGGAACACCAGTGGCGAAGGCGGCTTACTGGACAGTAACTGACGTTGAGGCTC…	>denovo68950	Bacteria;Firmicutes;Clostridia;Clostridiales;Lachnospiraceae	0.856735		0.0913079	0.0806429	0.0502942		0.252331	0.123457	0.127076		0.123106	0.09389	0.229791		0.634921	0.148083	0.347451		0.177936	0.0657489	0.0569495		0.273494	0.325852	0.0416109		0.194287	0.228794	0.195542		0.0311394	0.0321958	0.157344		0.13998	0.348816	0.295946		0.0675231	0.0565943	0.0291188		0.0767634	0.079591	0.0871736		0.0704854
CCTACGGGGGGCAGCAGTCGGGAATATTGCGCAATGGAGGAAACTCTGACGCAGTGACGCCGCGTGCAGGAAGAAGGTTTTCGGATTGTAAACTGCTTTAGACAGGGAAGAAGAAGTGACAGTACCTGTAGAATAAGCTCCGGCTAACTACGTGCCAGCAGCCGCGGTAATACGTAGGGAGCAAGCGTTATCCGGATTTATTGGGTGTAAAGGGTGCGTAGATGGATAAGCAAGTTAGTTGTGAAAACCCTCGGCTTAACTGAGGAATTGCAACTAAAACTGTTAATCTTGAGTACTGGAGGGGAAAGTGGAATTCCTAGTGTAGCGGTGAAATGCGTAGATATTAGGAAGAACACCGGTGGCGAAGGCGACTTTCTGGACAGTAACTGACATTGAGGC…	>denovo50127	Bacteria;Firmicutes;Clostridia;Clostridiales	0.853115		0.00668107	0.00556158					0.00907688										0.00286993	0.0123279	0.00669994																						0.00523387	0.00723554	0.00396244
CCTACGGGTGGCAGCAGTGGGGAATTTTGCGCAATGGGGGAAACCCTGACGCAGCAACGCCGCGTGCGGGATGACGGCCTTCGGGTTGTAAACCGCTTTCAGCAGGGAAGAAATTCGACGGTACCTGCAGAAGAAGCTCCGGCTAACTACGTGCCAGCAGCCGCGGTAATACGTAGGGAGCGAGCGTTATCCGGATTCATTGGGCGTAAAGAGCGCGTAGGCGGCCTTTCAAGCGGGATCTCTAATCCGAGGGCTCAACCCCCGGCCGGATCCCGAACTGGGAGGCTCGAGTTCGGTAGAGGCAGGCGGAATTCCCGGTGTAGCGGTGGAATGCGCAGATATCGGGAAGAACACCGATGGCGAAGGCAGCCTGCTGGGCCGAAACTGACGCTGAGGCGC…	>denovo121255	Bacteria;Actinobacteria;Actinobacteria;Coriobacteriales;Coriobacteriaceae;Eggerthella	0.841043																											0.109423	0.00766832
CCTAGGCGGCAGCAGTGGGGAATATTGGGCAATGGGCGCAAGCCTGACCCAGCAACGCCGCGTGAAGGAAGAAGGCCCTCGGGTTGTAAACTTCTTTTAACAGGGACGAAGCAAGTGACGGTACCTGTTGAATAAGCCACGGCTAACTACGTGCCAGCAGCCGCGGTAATACGTAGGTGGCAAGCGTTATCCGGATTTACTGGGTGTAAAGGGCGTGTAGGCGGGACTGCAAGTCAGATGTGAAAACTATGGGCTCAACCCATAGCCTGCATTTGAAACTGTAGTTCTTGAGTGCTGGAGAGGCAATCGGAATTCCGTGTGTAGCGGTGAAATGCATAGATATACGGAGGAACACCAGTGGCGAAGGCGGATTGCTGGACAGTAACTGACGCTGAGGCG…	>denovo42560	Bacteria;Firmicutes;Clostridia;Clostridiales;Ruminococcaceae	0.830846		0.0267243	0.0639582	0.0201177		0.830846	0.0308642	0.0272306							0.00274228	0.00365738		0.0086098	0.127389	0.0200998				0.0163472								0.00963329										0.00174462	0.00241185	0.00396244		0.00469903
CCTACGTGGGGCTGCAGTGGGGAATATTGCTCAATGGGGGAAACCCTGATGCAGCGACGCCGCGTGAGCGAAGAAGTATTTCGGTATGTAAAGCTCTATCAGCAGGGAAGAAAATGACGGTACCTGACTAAGAAGCATCGGCTAAATACGTGCCAGCAGCCGCGGTAATACGTATGGTGCAAGCGTTATCCGGATTTACTGGGTGTAAAGGGAGCGTAGACGGATGTGCAAGTCTGGAGTGAAAACCCGGGGCTCAACCCCGGGACTGCTTTGGAAACTGTATATCTTGAGTGCGGGAGAGGTAAGTGGAATTCCTAGTGTAGCGGTGAAATGCGTAGAGATTAGGAGGAACACCAGTGGCGAAGGCGGCTTACTGGACAGTAACTGACGTTGAGGCTC…	>denovo97697	Bacteria;Firmicutes;Clostridia;Clostridiales;Lachnospiraceae;Ruminococcus2	0.82525											0.140835	0.0145438		0.02886	0.00822684	0.0329164		0.00573987					0.00304535	0.00594442		0.05251	0.137845	0.0408977						0.00112887	0.00229484	0.00394594		0.00337615	0.00838434	0.0072797		0.00174462		0.00396244		0.00939805
CCTACGGGGGGCAGCAGTGAGGAATATTGGTCAATGGGCGTAAGCCTGAACCAGCCAAGTCGCGTGAGGGATGAAGGTTCTATGGATCGTAAACCTCTTTTATAAGGGAATAAAGTGCGGGACGTGTCCCGTTTTGTATGTACCTTATGAATAAGGATCGGCTAACTCCGTGCCAGCAGCCGCGGTAATACGGAGGATCCGAGCGTTATCCGGATTTATTGGGTTTAAAGGGTGCGTAGGCGGCATGACAAGTCAGCGGTGAAATGCCCGGGCTTAACCCGGGAGCTGCCGTTGAAACTGTCGAGCTAGCGTGCACAAGAGGTAGGCGGAATGCGTGGTGTAGCGGTGAAATGCATAGATATCACGCAGAACCCCGATTGCGAAGGCAGCCTACTAGGG…	>denovo29340	Bacteria;Bacteroidetes;Bacteroidia;Bacteroidales;Porphyromonadaceae;Parabacteroides	0.815637										0.00208655	0.00142258																							0.00112887				0.00337615	0.00628825	0.00363985
CCTACGGGTGGCTGCAGTGGGGAATATTGGGCAATGGGCGCAAGCCTGATCCAGCAACGCCGCGTGAAGGATGAAGGCTTTCGGGTTGTAAACTTCTTTTATCAGGGACGAAACAAATGACGGTACCTGATGAATAAGCCACGGCTAACTACGTGCCAGCAGCCGCGGTAATACGTAGGTGGCAAGCGTTATCCGGATTTACTGGGTGTAAAGGGCGTGTAGGCGGGACTGCAAGTCAGATGTGAAAACTATGGGCTCAACCCATAGCCTGCATTTGAAACTGTAGTTCGTGAGTGCGGGAGAGGAAATCGGAATTCCGTGTGTAGCGGTGAAATGCATAGATATACGGCGGAACAGCAGTGGCGAAGGCGGATTGCTGGACAGTAACTGACGCTGAGG…	>denovo41847	Bacteria;Firmicutes;Clostridia;Clostridiales;Ruminococcaceae;Pseudoflavonifractor	0.809305		0.0200432	0.0723005	0.0251471		0.809305	0.0462963	0.00907688										0.0315693	0.0575303	0.0301497				0.0014861																		0.00174462	0.00964739
CCTACGGGAGGCAGCAGTGGGGGATATTGCACAATGGAGGAAACTCTGATGCAGCGACGCCGCGTGAGGGAAGAAGGTTTTCGGATTGTAAACCTCTGTCTTCGGTGACGAAAATGACGGTAGCCGAGGAGGAAGCCACGGCTAACTACGTGCCAGCAGCCGCGGTAATACGTAGGTGGCAAGCGTTGTCCGGAATTACTGGGTGTAAAGGGAGCGTAGGCGGGAGTGCAAGTCGGCTGTCTAAACTATGGGCTCAACCCATAATCGCGGCCGAAACTGTACTTCTTGAGTGAAGTAGAGGTAAGCGGAATTCCTAGTGTAGCGGTGAAATGCGTAAATATTAGGAGGAACACCAGTGGCGAAGGCGGCTTACTGGGCTTTAACTGACGCTGAGGCTCG…	>denovo78872	Bacteria;Firmicutes;Clostridia;Clostridiales;Ruminococcaceae	0.773829		0.0400864	0.0278079	0.110647		0.0123088	0.0385802	0.0363075			0.00142258				0.00274228			0.0258294	0.0287652	0.0234498										0.00566171	0.00201223	0.0032111										0.0209355	0.0217066	0.0277371
CCTACGGGGGGCTGCAGTAGGGAATCTTCCACAATGGACGAAAGTCTGATGGAGCAACGCCGCGTGAGTGAAGAAGGGTTTCGGCTCGTAAAGCTCTGTTGGTAGTGAAGAAAGATAGAGGTAGTAACTGGCCTTTATTTGACGGTAATTACTTAGAAAGTCACGGCTAACTACGTGCCAGCAGCCGCGGTAATACGTAGGTGGCAAGCGTTGTCCGGATTTATTGGGCGTAAAGCGAGCGCAGGCGGAAGAATAAGTCTGATGTGAAAGCCCTCGGCTTAACCGAGGAACTGCATCGGAAACTGTTTTTCTTGAGTGCAGAAGAGGAGAGTGGAACTCCATGTGTAGCGGTGGAATGCGTAGATATATGGAAGAACACCAGTGGCGAAGGCGGCTCTC…	>denovo120237	Bacteria;Firmicutes;Bacilli;Lactobacillales;Lactobacillaceae;Lactobacillus	0.773435		0.00222702	0.013904	0.0100588		0.0338493	0.0385802	0.00907688							0.0521033	0.00365738		0.00286993		0.0234498		0.00759705	0.00304535	0.00891663		0.010502	0.00994756	0.00127805														0.00697849	0.00482369	0.00792487
CCTACGGGAGGCAGCAGTGGGGAATATTGCACAATGGGGGAAACCCTGATGCAGCGACGCCGCGTGAGTGAAGAAGTATTTCGGTATGTAAAGCTCTATCAGCAGGGAAGAAAATGACGGTACCTGACTAAGAAGCCCCGGCTAACTACGTGCCAGCAGCCGCGGTAATACGTAGGGAGCGAGCGTTGTCCGGATTTACTGGGTGTAAAGGGTGCGTAGGCGGATCTGCAAGTCAGTAGTGAAATCCCAGGGCTTAACCCTGGAACTGCTATTGAAACTGTGGGTCTTGAGTGAGGTAGAGGCAGGCGGAATTCCCGGTGTAGCGGTGAAATGCGTAGAGATCGGGAGGAACACCAGTGGCGAAGGCGGCCTGCTGGGCCTTAACTGACGCTGAGGCAC…	>denovo120184	Bacteria;Firmicutes;Clostridia;Clostridiales	0.771011		0.0155892	0.0222463	0.0301765		0.0338493	0.0231481	0.0907688		0.00625965	0.0128032	0.0305419		0.16354	0.21664	0.0512033		0.0258294	0.0410931	0.0535995		0.0531794	0.0517709	0.147124		0.383323	0.504484	0.637749		0.0481246	0.138844	0.0770663		0.0135465	0.00917936	0.00197297		0.00168808	0.00628825			0.0331478	0.0361777	0.0435868		0.0328932
CCTACGGGTGGCTGCAGTAGGGAATCTTCCACAATGGACGCAAGTCTGATGGAGCAACGCCGCGTGAGTGAAGAAGGTTTTCGGATCGTAAAGCTCTGTTGTTGGTGAAGAAGGATAGAGGTAGTAACTGGCCTTTATTTGACGGTAATCAACCAGAAAGTCACGGCTAACTACGTGCCAGCAGCCGCGGTAATACGTAGGTGGCAAGCGTTGTCCGGATTTATTGGGCGTAAAGCGAGTGCAGGCGGTTCAATAAGTCTGATGTGAAAGCCTTCGGCTCAACCGGAGAATTGCATCAGAAACTGTTGAACTTGAGTGCAGAAGAGGAGAGTGGAACTCCATGTGTAGCGGTGGAATGCGTAGATATATGGAAGAACACCAGTGGCGAAGGCGGCTCTC…	>denovo5045	Bacteria;Firmicutes;Bacilli;Lactobacillales;Lactobacillaceae;Lactobacillus	0.768803		0.00890809	0.00556158			0.073853	0.0617284	0.0181538										0.00286993	0.00821862	0.0401997				0.00743052		0.005251	0.00426324	0.0140586				0.0032111										0.00872311		0.0198122		0.00939805
CCTACGGGGGGCTGCAGTGGGGAATATTGCACAATGGGGGAAACCCTGATGCAGCGACGCCGCGTGAGCGAAGAAGTATTTCGGTATGTAAAGCTCTATCAGCAGGGAAGAAACTGACGGTACCTGACTAAGAAGCACCGGCTAAATACGTGCCAGCAGCCGCGGTAATACGTATGGTGCAAGCGTTATCCGGATTTACTGGGTGTAAAGGGAGCGTAGACGGCGAAGCAAGTCTGAAGTGAAAGCCCGGGGCTCAACCCCGGAATTGCTTTGGAAACTGTTTTGCTGGAGTGCAGGAGAGGCAAGCGGAATTCCTAGTGTAGCGGTGAAATGCGTAGATATTAGGAGGAACACCAGTGGCGAAGGCGGCTTGCTGGACTGTAACTGACGTTGAGGCTC…	>denovo34588	Bacteria;Firmicutes;Clostridia;Clostridiales;Lachnospiraceae;Clostridium XlVa	0.724789		0.0178162	0.0278079	0.0855002		0.0369265	0.0154321	0.0272306		0.118933	0.207696	0.347596		0.25974	0.128887	0.285275		0.0344392	0.00410931	0.0468996		0.0911646	0.0639522	0.0832219		0.099769	0.0270005	0.0856296		0.2661	0.068416	0.247255		0.106114	0.130806	0.270297		0.0894681	0.0461139	0.0218391		0.0697849	0.0530606	0.00792487		0.267845
CCTATGGGGGGCTGCAGTGGGGAATATTGGGCAATGGGCGCAAGCCTGACCCAGCAACGCCGCGTGAAGGAAGAAGGCCCTCGGGTTGTAAACTTCTTTTATCAGGGACGAAACAAATGACGGTACCTGATGAATAAGCCACGGCTAACTACGTGCCAGCAGCCGCGGTAATACGTAGGTGGCAAGCGTTATCCGGATTTACTGGGTGTAAAGGGCGTGTAGGCGGGACTGCAAGTCAGGCGTGAAAACCACGGGCTCAACCTGTTGCCTGCGTTTGAAACTGTAGTTCTTGAGTGATGGAGAGGCAGGCGGAATTCCGTGTGTAGCGGTGAAATGCGTAGATATACGGAGGAACACCAGTGGCGAAGGCGGCCTGCTGGACATTAACTGACGCTGAGG…	>denovo68973	Bacteria;Firmicutes;Clostridia;Clostridiales;Ruminococcaceae;Pseudoflavonifractor	0.715675						0.00307721					0.00142258				0.0164537	0.0182869		0.00286993		0.00334997		0.0531794	0.00609069			0.073514	0.00142108	0.0166147				0.0449554											0.00241185
CCTACGGGAGGCAGCAGTGAGGAATATTGGTCAATGGGCGATGGCCTGAACCAGCCAAGTAGCGTGAAGGATGACTGCCCTATGGGTTGTAAACTTCTTTTATAAAGGAATAAAGTCGGGTATGCATACCCGTTTGCATGTACTTTATGAATAAGGATCGGCTAACTCCGTGCCAGCAGCCGCGGTAATACGGAGGATCCGAGCGTTATCCGGATTTATTGGGTTTAAAGGGAGCGTAGGCGGACGCTTAAGTCAGTTGTGAAAGTTTGCGGCTCAACCGTAAAATTGCAGTTGATACTGGGTGTCTTGAGTACAGTAGAGGCAGGCGGAATTCGTGGTGTAGCGGTGAAATGCTTAGATATCACGAAGAACTCCGATTGCGAAGGCAGCCTGCTGGAC…	>denovo53062	Bacteria;Bacteroidetes;Bacteroidia;Bacteroidales;Bacteroidaceae;Bacteroides	0.708207								0.00907688						0.00962001				0.00286993				0.0759705	0.0487255																			0.00697849	0.00723554	0.00792487
CCTACGGGAGGCAGCAGTGGGGAATATTGCACAATGGGGGAAACCCTGATGCAGCAACGCCGCGTGAAGGAAGAAGGTTTTCGGATCGTAAACTTCTATCAATAGGGACGAAGGAAATGACGGTACCTAAATAAGAAGCCCCGGCTAACTACGTGCCAGCAGCCGCGGTAATACGTAGGGGGCGAGCGTTATCCGGAATTACTGGGTGTAAAGGGAGCGTAGGCGGCATGGTAAGTAAGATGTGAAAGCCCGCAGCTTAACTGCGAGGATTGCATTTTAAACTATCAAGCTAGAGTACAGGAGAGGAAAGCGGAATTCCTAGTGTAGCGGTGAAATGCGTAGATATTAGGAAGAACACCAGTGGCGAAGGCGGCTTTCTGGACTGAAACTGACGCTGAG…	>denovo19155	Bacteria;Firmicutes;Clostridia;Clostridiales;Lachnospiraceae;Clostridium XlVb	0.705188		0.113578	0.194655	0.110647		0.00307721	0.0925926	0.00907688		0.00208655	0.00853546	0.00872626		0.30784	0.0164537				0.0410931	0.00669994			0.00304535	0.00297221		0.026255	0.0255794	0.247942			0.00402447	0.0064222		0.0541859	0.0550762	0.00591891		0.0590827	0.0607865	0.0303321		0.00348924	0.00241185	0.00396244
CCTTCGGGAGGCTGCAGTAGGGAATCTTCCACAATGGGCGCAAGCCTGATGGAGCAACACCGCGTGAGTGAAGAAGGGTTTCGGCTCGTAAAACTCTGTTGTTGAAGAAGAACGTGCGTGAGAGTAACTGTTCACGCAGTGACGGTATTCAACCAGAAAGTCACGGCTAACTACGTGCCAGCAGCCGCGGTAATACGTAGGTGGCAAGCGTTATCCGGATTTATTGGGCGTAAAGCGAGCGCAGGCGGTTACTTAAGTCTGATGTGAAAGCCTTCGGCTTAACCGAAGAAGTGCATCGGAAACTGGGTGACTTGAGTGCAGAAGAGGACAGTGGAACTCCATGTGCAGCGGTGGGATGCGTAGATATATGGAAGAACACCAGTGGCGAAGGCGGCTGTC…	>denovo99635	Bacteria;Firmicutes;Bacilli;Lactobacillales;Lactobacillaceae;Lactobacillus	0.690479																										0.015753	0.0198951	0.642861
CCTACGGGTGGCTGCAGTGTGGAATATTGCACAATGGGGGAAACCCTGATGCAGCGACGCCGCGTGAGTGAAGAAGTATTTCGGTATGTAAAGCTCTATCAGCAGGGAAGAAGAAAGACGGTACCTGACTAAGAAGCCCCGGCTAACTACGTGCCAGCAGCCGCGGTAATACGTAGGGGGCACGCGTTATCCGGATTTACTGGGTGTAAAGGGAGCGTAGACGGCGAAGCAAGTCTGAAGTGAAAGCCCGGGGCTCAACCGCGGGACGGCTGTGGAAACTGTTTTGCTAGAGTGCTGGAGAGGTAAGTGGAATTCCTAGTGGAGCGGTGAAATGCGTAGATACTAGGAGGAACACCAGTGGCGAAGGCGGCTTACTGGACAGTAACTGACGTTGAGGCT…	>denovo69827	Bacteria;Firmicutes;Clostridia;Clostridiales;Lachnospiraceae	0.647506										0.0730293	0.0355644	0.130894		0.23569	0.0987221	0.0987492						0.00759705	0.00304535			0.015753	0.0426324	0.0319513						0.104985	0.0849091	0.0789188		0.00506423	0.0104804	0.00121328
CCTACGGGTGGCTGCAGTAGGGAATATTGCACAATGGGGGAAACCCTGATGCAGCGACGCCGCGTGAGCGAAGAAGTATCTCGGTATGTAAAGCTCTATCAGCAGGGAAGAAGATGACGGTACCTGACTAAGAAGCACCGGCTAAATACGTGCCAGCAGCCGCGGTAATACGTATGGTGCAAGCGTTATCCGGATTTACTGGGTGTAAAGGGAGTGTAGACGGAAGAGCAAGTATGGAGTGAAAGCCCGGGGCTCAACCCCGGGACTGCTTTGGAAACTGGTTATCTAGAGTGCTGGAGAGGTAAGTGGAATTCCTAGTGTAGCGGTGAAATGCGTAGATATTAGGAGGAACACCAGTGGCGAAGGCGGCTTACTGGACAGTAACTGACGTTGAGGCTC…	>denovo114110	Bacteria;Firmicutes;Clostridia;Clostridiales;Lachnospiraceae	0.647067		0.0155892	0.00834237	0.00502942						0.0104328	0.139412	0.00727188		0.00962001	0.00274228	0.00731475						0.0151941	0.00304535	0.0014861		0.005251	0.00142108	0.00639027		0.00283086		0.0032111				0.00197297			0.00209608	0.00121328		0.00523387		0.00396244
TCTACGGGCGGCAGCAGTGGGGAATATTGCACAATGGGGGAAACCCTGATGCAGCGACGCCGCGTGAGTGAAGAAGTATTTCGGTATGTAAAGCTCTATCAGCAGGGAAGAAGAAAGACGGTACCTGACTAAGAAGCCCCGGCTAACTACGTGCCAGCAGCCGCGGTAATACGTAGGGGGCAAGCGTTATCCGGATTTACTGGGTGTAAAGGGAGCGTAGACGGCGAAGCAAGTCTGAAGTGAAAGCCCGGGGCTCAACCGCGGGACTGCTTTGGAAACTGTTTTGCTAGAGTGCTGGAGAGGTAAGTGGAATTCCTAGTGTAGCGGTGAAATGCGTAGATATTAGGAGGAACACCAGTGGCGAAGGCGGCTTACTGGACAGTAACTGACGCTGAGGCT…	>denovo21994	Bacteria;Firmicutes;Clostridia;Clostridiales;Lachnospiraceae;Clostridium XlVa	0.643028										0.00625965	0.0142258	0.034905		0.01924	0.0521033	0.0182869										0.005251	0.0113686	0.0115025						0.0225774	0.013769	0.00789188		0.00168808	0.00209608
CCTACGGGAGGCAGCAGTGGGGAATTTTGCGCAATGGGGGCAACCCTGACGCAGCAACGCCGCGTGCGGGACGAAGGCCTTCGGGTCGTAAACCGCTTTCAGCAGGGAAGACAGCGACGGTACCTGCAGAAGAAGCCCCGGCTAACTACGTGCCAGCAGCCGCGGTAATACGTAGGGGGCGAGCGTTATCCGGAATCATTGGGCGTAAAGAGCGCGTAGGCGGCCCCTCAAGCGGGATCTCTAATCCGAGGGCTCAACCCCCGGCCGGATCCCGAACTGGGGGGCTCGGGTGCGGTAGAGGAGGATGGAATTCCCGGTGTAGCGGTGGAATGCGCAGATATCGGGAAGAACACCGATGGCGAAGGCAGTCCTCTGGGCCGCCACCGACGCTGAGGCGCG…	>denovo52089	Bacteria;Actinobacteria;Actinobacteria;Coriobacteriales;Coriobacteriaceae;Eggerthella	0.639049		0.0244972	0.00834237	0.0251471		0.00923162	0.00771605	0.0181538		0.173184	0.0540579	0.0959888		0.10582	0.0767839	0.0841197		0.00286993		0.0100499		0.0759705	0.0852697	0.0237777		0.21004	0.189004	0.106078		0.00283086	0.0201223	0.0032111			0.0183587			0.0185688	0.00838434	0.0072797		0.0191908	0.0265303	0.00396244		0.0281942
CCTACGGGTGGCAGCAGTGGGGAATATTGGGCAATGGGCGCAAGCCTGACCCAGCAGCGCCGCGTGAAGGAAGAAGGCTTTCGGGTTGTAAACTTCTTTTGTCAGGGAACAGTAGAAGAGGGTACCTGACGAATAAGCCACGGCTAACTACGTGCCAGCAGCCGCGGTAATACGTAGGTGGCAAGCGTTGTCCGGATTTACTGGGTGTAAAGGGCGTGCAGCCGGGCTGGTAAGTCAGATGTGAAATCCGTGGGCTTAACCCACGAACTGCATTTGAAACTGCTGGTCTTGAGTACCGGGGAGGTTATCGGAATACCTGGGGTAGCGGTGAAATGCGTAGATATAAGGAAGAACACCAGTGGCGAAGGCGGATAACTGGACGGCAACTAACGGTGAGGC…	>denovo56544	Bacteria;Firmicutes;Clostridia;Clostridiales;Ruminococcaceae;Oscillibacter	0.632716		0.138075	0.013904	0.095559		0.0276949	0.632716	0.00907688			0.00142258							0.00286993	0.0205465					0.00297221										0.00112887	0.00229484							0.00697849	0.00482369	0.00396244
CCTACGGGGGGCAGCAGTCGGGAATATTGCGCAATGGAGGAAACTCTGACGCAGTGACGCCGCGTGCAGGAAGAAGGTTTTCGGATTGTAAACTGCTTTAGACAGGGAAGAAAAAGGACAGTACCTGTAGAATAAGCTCCGGCTAACTACGTGCCAGCAGCCGCGGTAATACGTAGGGAGCAAGCGTTATCCGGATTTATTGGGTGTAAAGGGTGCGTAGACGGGAAATTAAGTTAGTTGTGAAATCCCTCGGCTCAACTGAGGAACTGCAACTAAAACTGATATTCTTGAGTGCTGGAGAGGAAAGTGGAATTCCTAGTGTAGCGGTGAAATGCGTAGATATTAGGAGGAACACCAGTGGCGAAGGCGGCTTACTGGACGGTGACTGACGTTGAGGCT…	>denovo75569	Bacteria;Firmicutes;Clostridia;Clostridiales	0.624878		0.00222702		0.0201177		0.00923162														0.00334997										0.00283086	0.00201223											0.0122124	0.00241185
CCTACGGGAGGCAGCAGTGGGGAATATTGCACAATGGGGGAAACCCTGATGCAGCGACGCCGCGTGAAGGAAGAAGTATTTCGGTATGTAAACTTCTATCAGCAGGGAAGAAGATGACGGTACCTGACTAAGAAGCCCCGGCTAACTACGTGCCAGCAGCCGCGGTAATACGTAGGGGGCAAGCGTTATCCGGATTTACTGGGTGTAAAGGGAGCGTAGACGGAGCAGCAAGTCTGATGTGAAAGACCGGGGCTTAACCCCGGGCCTGCATTGGAAACTGTTGATCTTGAGTGCCGGAGGGGTAAGCGGAATTCCTGGTGTAGCGGTGAAATGCGTAGATATCAGGAGGAACACCGGTGGCGAAGGCGGCTTACTGGACGGCAACTGACGTTGAGGCTC…	>denovo34312	Bacteria;Firmicutes;Clostridia;Clostridiales;Lachnospiraceae;Blautia	0.620382		0.251654	0.152943	0.331942		0.0246177	0.0231481	0.0181538		0.0041731	0.00711288	0.00145438			0.0109691			0.0172196	0.0123279	0.0301497			0.00304535	0.00891663						0.0113234	0.00804894	0.0128444		0.00677323	0.0298329	0.00591891		0.00168808		0.00121328		0.0226801	0.0434132	0.0237746		0.14567
CCTACGGGAGGCAGCAGTGGGGGATATTGCACAATGGGGGAAACCCTGATGCAGCAACGCCGCGTGTGGGAAGAAGGTTTTCGGATTGTAAACCACTGTTCTTGGTGAAGATAATGACGGTAACCAAGGAGAAAGCTCCGGCTAACTACGTGCCAGCAGCCGCGGTAATACGTAGGGAGCAAGCGTTGTCCGGATTTACTGGGTGTAAAGGGTGCGTAGGCGGCTAGGCAAGTCAGACGTGAAAACCATGGGCTCAACCTGTGGACTGCGTTTGAAACTGTTTAGCTTGAGTGAAGTAGAGGTAGGCGGAATTCCCGGTGTAGCGGTGAAATGCGTAGAGATCGGGAGGAACACCAGTGGCGAAGGCGGCCTACTGGGCTTTAACTGACGCTGAGGCAC…	>denovo71409	Bacteria;Firmicutes;Clostridia;Clostridiales;Ruminococcaceae;Clostridium IV	0.615969			0.00278079	0.035206		0.00307721		0.0181538		0.0125193	0.00711288	0.266151		0.12025	0.0658147	0.029259			0.00410931			0.0379853	0.283217	0.0326943		0.031506	0.0341059	0.0127805		0.178344	0.0985995	0.436709		0.228032	0.110152	0.0591891		0.0101285	0.0461139	0.00363985		0.00872311				0.0516893
CCTACGGGTGGCAGCAGTGAGGGATATTCGGCAATGGGGGAAACCCTGACCGAGCAACGCCGCGTGAGGGAAGACGGTTTTCGGATTGTAAACCTCTGTCCTCTGTGAAGATAGTGACGGTAGCAGAGGAGGAAGCTCCGGCTAACTACGTGCCAGCAGCCGCGGTAATACGTAGGGAGCAAGCGTTGTCCGGATTTACTGGGTGTAAAGGGTGCGTAGGCGGATTGGCAAGTCAGAAGTGAAATCCATGGGCTTAACCCATGAACTGCTTTTGAAACTGTTAATCTTGAGTGAAGTAGAGGTAGGCGGAATTCCCGGTGTAGCGGTGAAATGCGTAGAGATCGGGAGGAACACCAGTGGCGAAGGCGGCCTACTGGGCTTTAACTGACGCTGAGGCAC…	>denovo73017	Bacteria;Firmicutes;Clostridia;Clostridiales;Ruminococcaceae;Clostridium IV	0.610749		0.218248	0.28086	0.0804708		0.00923162	0.00771605			0.525811	0.00426773	0.00727188		0.00481				0.0086098		0.0133999				0.0104027						0.00283086		0.0032111		0.00112887				0.021945				0.0331478	0.110945	0.0594365		0.0187961
CCTACGGGTGGCTGCAGTGGGGAATATTGCACAATGGGGGAAACCCTGATGCAGCGACGCCGCGTGAGCGAAGAAGTATCTCGGTATGTAAAGCTCTATCAGCAGGGAAGAAGATGACGGTAACTGACTAAGAAGCACCGGCTAAATACGTGCCAGCAGCCGCGGTAATACGTATGGTGCAAGCGTTATCCGGATTTACTGGGTGTAAAGGGAGCGTAGACGGAAAAGCACGTCTGGAGTGAAAACCCGGGGCTCAACCCCGGGACTGCTTTGGAAACTGTTTTTCTAGAGTGCCGGAGAGGTAAGCGGAATGCGTAGTGTAGCGGTGAAATGCGTAGATATTAGGAGGAACACCAGTGGCGAAGGCGGCTTACTGGACAGCAACTGACGTTGAGACTC…	>denovo65695	Bacteria;Firmicutes;Clostridia;Clostridiales;Lachnospiraceae	0.590491		0.416453	0.0417119	0.0502942		0.015386	0.0231481				0.00142258								0.0123279	0.0100499				0.00445831																						0.00469903
TCTACGGGGGGCTGCAGTGGGGAATATTGCACAATGGGGGAAACCCTGATGCAGCGACGCCGCGTGAGTGAAGAAGTATTTCGGTATGTAAAGCTCTATCAGCAGGGAAGAAAATGACGGTACCTGACTAAGAAGCCCCGGCTAACTACGTGCCAGCAGCCGCGGTAATACGTAGGGGGCAAGCGTTATCCGGATTTACTGGGTGTAAAGGGAGCGTAGACGGCGAAGCAAGTCTGAAGTGAAAGCCCGGGGCTCAACCGCGGGACTGCTTTGGAAACTGTTTTGCTAGAGTGCTGGAAAGGTAAGTGGAATTCCTAGTGTAGCGGTGAAATGCGTAGATGTTAGAAGAAACACCAGTGGCGAAGGCGGCTTACTGGACAGTAACTAACGTTGAGGCTC…	>denovo94967	Bacteria;Firmicutes;Clostridia;Clostridiales;Lachnospiraceae;Clostridium XlVa	0.588041										0.106414	0.0711288	0.120713		0.29341	0.145341	0.168239						0.00759705	0.00304535			0.026255	0.106581	0.0741271						0.0643457	0.0757298	0.0493243		0.0118165	0.025153	0.00606642
CCTACGGGTGGCTGCAGTGGGGAATATTGCACAATGGGCGCAAGCCTGATGCAGCCATGCCGCGTGTATGAAGAAGGCCTTAGGGTTGTAAAGTACTTTCAGCGGGGAGGAAGGTGATAAGGTTAATACCCTTATCAATTGACGTTACCCGCAGAAGAAGCACCGGCTAACTCCGTGCCAGCAGCCGCGGTAATACGGAGGGTGCAAGCGTTAATCGGAATTACTGGGCGTAAAGCGCACGCAGGCGGTTTGTTAAGTCAGATGTGAAATCCCCGGGCTCAACCTGGGAACTGCATCTGATACTGGCAAGCTTGAGTCTCGTAGAGGGGGGTAGAATTCCAGGTGTAGCGGTGAAATGCGTAGAGATCTGGAGGAATACCGGTGGCGAAGGCGGCCCCC…	>denovo61564	Bacteria;Proteobacteria;Gammaproteobacteria;Enterobacteriales;Enterobacteriaceae;Escherichia/Shigella	0.587817																							0.00304535	0.0133749			0.00284216
CCTACGGGAGGCAGCAGTGGGGAATATTGCACAATGGGGGAAACCCTGATGCAGCGACGCCGCGTGAAGGATGAAGTATTTCGGTATGTAAACTTCTATCAGCAGGGAAGAAAGTGACGGTACCTGACTAAGAAGCCCCGGCTAACTACGTGCCAGCAGCCGCGGTAATACGTAGGGGGCAAGCGTTATCCGGATTTACTGGGTGTAAAGGGAGCGTAGACGGGATAGCAAGTCTGAAGTGAAAGCCCGGGGCTCAACCCCGGGACTGCTTTGGAAACTGTTGACCTGGAGTGCTGGAGAGGCAAGTGGAATTCCTAGTGTAGCGGTGAAATGCGTAGATATTAGGAGGAACACCAGTGGCGAAGGCGGCTTGCTGGACAGTGACTGACGTTGAGGCTC…	>denovo53849	Bacteria;Firmicutes;Clostridia;Clostridiales;Lachnospiraceae;Dorea	0.586361		0.0601296	0.10567	0.0905296		0.178478	0.0617284	0.108923							0.00274228	0.00365738		0.0918379	0.283542	0.190948			0.0182721	0.00891663						0.00283086		0.0032111										0.050594	0.0144711	0.0713238		0.0140971
TCTACGGGTGGCAGCAGTGGGGGATATTGCACAATGGGGGAAACCCTGATGCAGCGACGCCGCGTGAGTGAAGAAGTATTTCGGTATGTAAAGCTCTATCAGCAGGGAAGAGAATGACGGTACCTGAGTAAGAAGCCCCGGCTAACTACGTGCCAGCAGCCGCGGTAATACGTAGGGGGCAAGCGTTATCCGGATTTACTGGGTGTAAAGGGAGCGTAGACGGCAAAGCAAGTCTGAAGTGAAAACCCGGGGCTCAACCCCGGGATTGCTTTGGAAACTGTTCTGCTAGAGTGCAGGAGAGGTAAGCGGAATTCCTAGGGTAGCGGTGAAATGCGTAGATATTAGGAGGAACACCAGTGGCGAAGGCGGCTTACTGGACTGTAACTGACGTTGAGGCTC…	>denovo118754	Bacteria;Firmicutes;Clostridia;Clostridiales;Lachnospiraceae;Clostridium XlVa	0.581291		0.097989	0.0611774	0.035206		0.135397	0.0308642	0.0635382		0.083462	0.0312967	0.0858082		0.0577201	0.0164537	0.0219443		0.086098	0.0369838			0.311479	0.252764	0.0118888		0.147028	0.123634	0.0587905		0.0141543	0.00201223	0.186244		0.0327373	0.121627	0.112459		0.0253212	0.0146726	0.0218391		0.013957	0.0554725	0.063399		0.0516893
CCTACGGGTGGCAGCAGTGGGGAATATTGGGCAATGGGCGCAAGCCTGACCCAGCAACGCCGCGTGAAGGAAGAAGGCCCTCGGGTTGTAAACTTCTTTTGTCAGGGACGAAGCAAGTGACGGTACCTGACGAATAAGCCACGGCTAACTACGTGCCAGCAGCCGCGGTAATACGTAGGCGGCAAGCGTTGTCCGGAATTATTGGGCGTAAAGGGAGCGCAGGCGGGAAGTTAAGCGGACTTTAAAAGTGCGGGGCTCAACCCCGTGAGGGGGTCCGAACTGACTTTCTTGAGTGCAGGAGAGGGAAGCGGAATTCCTAGTGTAGCGGTGAAATGCGTAGATATTAGGAAGAACACCAGTGGCGAAGGCGGCTTTCTGGACTGTAACTGACGCTGAGGC…	>denovo60946	Bacteria;Firmicutes;Negativicutes;Selenomonadales;Veillonellaceae;Megamonas	0.567311															0.00822684	0.0365738
CCTACGGGAGGCTGCAGTCGGGAATATTGCGCAATGGAGGGAACTCTGACGCAGTGACGCCGCGTATAGGAAGAAGGTCTTCGGATTGTAAACTATTGTCGTTAGGGAAGAAGAAGGACAGTACCTAAGGAGGAAGCTCCGGCTAACTACGTGCCAGCAGCCGCGGTAATACGTAGGGAGCGAGCGTTATCCGGATTTATTGGGTGTAAAGGGTGCGTAGACGGGTTAGCAAGTTAGTTGTGAAATCCCTCGGCTCAACTGAGGAACTGCAACTAAAACTGTTAATCTTGAGTGCAGGAGAGGAAAGCGGAATTCCTAGTGTAGCGGTGAAATGCGTAGATATTAGGAGGAACACCAGTGGCGAAGGCGGCTTTCTGGACTGTAACTGACGTTGAGGCA…	>denovo114155	Bacteria;Firmicutes;Clostridia;Clostridiales	0.56187		0.00222702	0.00278079					0.00907688										0.0286993																								0.472793	0.0578843	0.0316995
CCTATGGGTGGCAGCAGTGGGGAATATTGCACAATGGGGGAAACCCTGATGCAGCGACGCCGCGTGAGTGAAGAAGTATTTCGGTATGTAAAGCTCTATCAGCAGGGAAGAAATTGACGGTACCTGACTAAGAAGCACCGGCTAACTCCGTGCCAGCAGCCGCGGTAATACGGAGGGTGCAAGCGTTATCCGGATTTACTGGGTGTAAAGGGAGCGTAGACGGAGCAGCAAGTCTGGAGTGAAAACCCGGGGCTCAACCCCGGGACTGCTTTGGAAACTGTTGTTCTAGAGTGCTGGAGAGGTAAGTGGAATTCCTAGTGTAGCGGTGAAATGCGTAGATATTAGGAGGAACACCAGTGGCGAAGGCGGCTTACTGGACAGTAACTGACGTTGAGGCTC…	>denovo4020	Bacteria;Firmicutes;Clostridia;Clostridiales;Lachnospiraceae;Ruminococcus2	0.556399		0.0445405	0.013904	0.035206		0.00615441	0.0540123	0.0181538		0.0563369	0.352799	0.106169		0.0577201	0.0987221	0.149952			0.00821862	0.00334997		0.0607764	0.0852697	0.0386387		0.047259	0.102318	0.0945759		0.0113234	0.0181101	0.0128444		0.108372	0.0413071	0.0572161		0.021945	0.0314413	0.00363985			0.00482369	0.00396244		0.122175
CCTACGGGTGGCTGCAGTGGGGAATATTGCACAATGGGGGAAACCCTGATGCAGCGACGCCGCGTGAGTGAAGAAGTATTTCGGTATGTAAAGCTCTATCAGCAGGGAAGAAAAAAGACGGTACCTGACTAAGAAGCCCCGGCTAACTACGTGCCAGCAGCCGCGGTAATACGTAGGGGGCAAGCGTTATCCGGAATTACTGGGTGTAAAGGGTGCGTAGGTGGCATGGTAAGTCAGAAGTGAAAGCCCGGGGCTTAACCCCGGGACTGCTTTTGAAACTGTCATGCTGGAGTGCAGGAGAGGTAAGCGGAATTCCTAGTGTAGCGGTGAAATGCGTAGATATTAGGAGGAACACCAGTGGCGAAGGCGGCTTACTGGACTGTCACTGACACTGATGCA…	>denovo108697	Bacteria;Firmicutes;Clostridia;Clostridiales;Lachnospiraceae;Anaerostipes	0.551857		0.00222702		0.00502942			0.00771605			0.00208655																0.010502				0.00283086	0.0181101	0.00963329
CCTACGGGAGGCAGCAGTGGGGGATATTGCACAATGGGGGAAACCCTGATGCAGCAACGCCGCGTGAGGGAAGAAGGTCTTCGGATTGTAAACCTTTGTTCTTGGTGACGAAGAAGTGACGGTAACCAAGGAGAAAGCTCCGGCTAACTACGTGCCAGCAGCTGCGGTAATACGTAGGGAGCGAGCGTTGTCCGGAATTACTGGGTGTAAAGGGTGCGCAGGCGGGACTGCAAGTTGGATGTGAAATGCCGGGGCTTAACCCCGGAGCTGCATCCAAAACTGTAGTTCTTGAGTGAAGTAGAGGCAGGCGGAATTCCGAGTGTAGCGGTGAAATGCGTAGATATTCGGAGGAACACCAGTGGCGAAGGCGGCCTGCTGGGCTTTAACTGACGCTGAGGC…	>denovo62599	Bacteria;Firmicutes;Clostridia;Clostridiales;Ruminococcaceae;Clostridium IV	0.550236		0.0311783	0.0278079	0.00502942		0.00307721		0.0181538										0.0086098	0.00410931	0.00669994						0.010502																0.00697849	0.0241185	0.00792487		0.00939805
CCTACGGGTGGCAGCAGTGAGGAATATTGGTCAATGGGCGCAGGCCTGAACCAGCCAAGTAGCGTGAAGGATGACTGCCCTATGGGTTGTAAACTTCTTTTATATGGGAATAAAGTTTTCCACGTGTGGAATTTTGTATGTACCATATGAATAAGGATCGGCTAACTCCGTGCCAGCAGCCGCGGTAATACGGAGGATCCGAGCGTTATCCGGATTTATTGGGTTTAAAGGGAGCGTAGGTGGATTGTTAAGTCAGTTGTGAAAGTTTGCGGCTCAACCGTAAAATTGCAGTTGAAACTGGCAGTCTTGAGTACAGTAGAGGTGGGCGGAATTCGTGGTGTAGCGGTGAAATGCTTAGATATCACGAAGAACTCCGATTGCGAAGGCAGCCTGCTAAGC…	>denovo57059	Bacteria;Bacteroidetes;Bacteroidia;Bacteroidales;Bacteroidaceae;Bacteroides	0.546652
CCTACGGGTGGCTGCAGTGGGGGGTATTGCACAATGGGGGAAACCCTGATGCAGCGACGCCGCGTGAGCGAAGAAGTATCTCGGTATGTAAAGCTCTATCAGCAGGGAAGAAGATGACGGTACCTGACTAAGAAGCACCGGCTAAATACGTGCCAGCAGCCGCGGTAATACGTATGGTGCAAGCGTTATCCGGATTTACTGGGTGTAAAGGGAGCGTAGACGGAAGAGCAAGTCTGGAGTGAAAGCCCGGGGCTCAACCCCGGGACTGCTTTGGAAACTGTTCATCTAGAGTGCCGGAGAGGCAAGCGGAATGCCTAGTGTAGCGGTGAAATGCGTAGATATTAGGAGGAACACCAGTGGCGAAGGCGGCTTGCTGCACGGTAACTGACGTTGAGGCTC…	>denovo32296	Bacteria;Firmicutes;Clostridia;Clostridiales;Lachnospiraceae;Ruminococcus2	0.54561		0.0244972	0.0194655			0.00307721	0.0231481	0.0272306										0.00286993	0.0246558	0.0133999		0.00759705	0.00609069	0.0014861																		0.00697849	0.00241185	0.00396244
CTTACGGGGGGCAGCAGTAGGGAATCTTCCACAATGGACGCAAGTCTGATGGAGCAACGCCGCGTGAGTGAAGAAGGTTTTCGGATCGTAAAGCTCTGTTGTTGGTGAAGAAGGATAGAGGTAGTAACTGGCCTTTATTTGACGGTAATCAACCAGAAAGTCACGGCTAACTACGTGCCAGCAGCCGCGGTAATACGTAGGTGGCAAGCGTTGTCCGGATTTATTGGGCGTAAAGCGAGCGCAGGCGGAAGAATAAGTCTGATGTGAAAGCCCTCGGCTTAACCGAGGAACTGCATCGGAAACTGTTTTTCTTGAGTGCAGAAGAGGAGAGTGGAACTCCATGTGTAGCGGTGGAATGCGTAGATATATGGAAGAACACCAGTGGCGAAGGCGGCTTAC…	>denovo89274	Bacteria;Firmicutes;Bacilli;Lactobacillales;Lactobacillaceae;Lactobacillus	0.543701		0.0489945	0.013904	0.0150883		0.0769302	0.0540123	0.0272306							0.00274228	0.00365738		0.0229595	0.00410931	0.184248			0.00304535	0.0653886		0.005251	0.00994756	0.0536782		0.0254777	0.146893	0.179821		0.00112887								0.0226801		0.0475492		0.0610874
CCTACGGGCGGCTGCAGTGAGGAATATTGGTCAATGGACGAGAGTCTGAACCAGCCAAGTAGCGTGAAGGATGACTGCCCTATGGGTTGTAAACTTCTTTTATATGGGAATAAAGTATTCCACGTGTGGGATTTTGTATGTACCATATGAATAAGGATCGGCTAACTCCGTGCCAGCAGCCGCGGTAATACGGAGGATCCGAGCGTTATCCGGATTTATTGGGTTTAAAGGGAGCGTAGGTGGATTGTTAAGTCAGTTGTGAAAGTTTGCGGCTCAACCGTAAAATTGCAGTTGAAACTGGCAGTCTTGAGTACAGTAGAGGTGGGCGGAATTCGTGGTGTAGCGGTGAAATGCTTAGATATCACGAAGAACTCCGATTGCGAAGGCAGCATGCCAGTC…	>denovo5802	Bacteria;Bacteroidetes;Bacteroidia;Bacteroidales;Bacteroidaceae;Bacteroides	0.543134
CCTACGGGTGGCTGCAGTGGGGAATATTGCACAATGGGGGAAACCCTGATGCAGCGACGCCGCGTGAAGGAAGAAGTATTTCGGTATGTAAACTTCTATCAGCAGGGAAGAAGATGACGGTACCTGACTAAGAAGCCCCGGCTAACTACGTGCCAGCAGCCGCGGTAATACGTAGGGGGCAAGCGTTATCCGGATTTACTGGGTGTAAAGGGAGCGTAGACGGAGCGGCAAGTCTGGAGTGAAAACCCGGGGCTTAACCCTGGGACTGCTTTGGAAACTGTCGTTCTTGAGTGCCGGAGGGGTAAGCGGAATTCCTAGTGTAGCGGTGAAATGCGTAGATATTAGGAGGAACACCAGTGGCGAAGGCGGCTTACTGGACGGCAACTGACGTTGAGGCTC…	>denovo84774	Bacteria;Firmicutes;Clostridia;Clostridiales;Lachnospiraceae	0.542368			0.00278079	0.00502942			0.131173				0.00142258					0.00731475		0.0172196	0.00821862															0.00225774	0.0321278	0.00394594						0.0174462	0.00964739	0.0237746
CCTACGGGTGGCAGCAGTGGGGGATATTGCACAATGGGGGAAACCCTGATGCAGCAACGCCGCGTGAAGGAAGAAGGTCTTCGGATTGTAAACTTCTGTCCTCAGGGAAGATAATGACGGTACCTGAGGAGGAAGCTCCGGCTAACTACGTGCCAGCAGCCGCGGTAATACGTAGGGAGCGAGCGTTGTCCGGATTTACTGGGTGTAAAGGGTGCGTAGGCGGATCTGCAAGTCAGTAGTGAAATCCCAGGGCTTAACCCTGGAACTGCTATTGAAACTGTGGGTCTTGAGTGAGGTAGAGGCAGGCGGAATTCCCGGTGTAGCGGTGAAATGCGTAGATATTAGGAGGAACACCAGTGGCGAAGGCGGCTTACTGGACGGTAACTGACGTTGAGGCTC…	>denovo130515	Bacteria;Firmicutes;Clostridia;Clostridiales;Ruminococcaceae	0.526902		0.00668107				0.0246177		0.0181538				0.0203613		0.01443	0.137114			0.0114797	0.00821862	0.0167499		0.00759705	0.0274081	0.0549859		0.099769	0.227373	0.212157		0.00849257	0.0503059	0.0577998		0.00903098	0.00229484				0.00419217			0.0104677	0.00723554	0.0158497		0.0140971
CCTACGGGAGGCTGCAGTGGGGAATATTGCACAATGGGGGAAACCCTGATGCAGCGACGCCGCGTGAGCGAAGAAGTATTTCGGTATGTAAAGCTCTATCAGCAGGGAAGAAGAAAGTGACGGTACCTGACTAAGAAGCTCCGGCTAAATACGTGCCAGCAGCCGCGGTAATACGTATGGAGCAAGCGTTATCCGGATTTACTGGGTGTAAAGGGAGCGTAGGCGGTGCTATAAGTCTGATGTGAAAGCCCGGGGCTCAACCGCGGGACTGCATTGGAAACTGTAGGACTGGAGTGTCGGAGGGGTAAGTGGAATTCCTAGTGTAGCGGTGAAATGCGTAGATATTAGGAGGAACACCGGTGGCGAAGGCGGCTTACTGGACGACAACTGACGCTGAGG…	>denovo12582	Bacteria;Firmicutes;Clostridia;Clostridiales;Lachnospiraceae;Roseburia	0.525569		0.198205	0.525569	0.427501		0.0523125	0.0617284	0.0635382			0.00711288	0.00727188			0.00548456	0.00731475			0.0452024	0.0535995										0.0141543	0.0160979	0.0192666		0.00338662	0.0780246			0.00506423
CCTACGGGAGGCAGCAGTGGGGAATATTGGGCAATGGGCGCAAGCCTGACCCAGCAACGCCGCGTGAAGGAAGAAGGCCCTCGGGTTGTAAACTTCTTTTGTCAGGGACGAAGCAAGTGACGGTACCTGACGAATAAGCCACGGCTAACTACGTGCCAGCAGCCGCGGTAATACGTAGGTGGCAAGCGTTATCCGGATTTACTGGGTGTAAAGGGAGCGTAGACGGCATGGCAAGTCTGGAGTGAAAACCCAGGGCTCAACCTTGGGATTGCTTTGGAAACTGTCAAGCTGGAGTGCCGGAGAGGTAAGCGGAATTCCTAGTGTAGCGGTGAAATGCGTAGATATTAGGAGGAACACCAGTGGCGAAGGCGGCTTACTGGACGGTAACTGACGTTGAGG…	>denovo42024	Bacteria;Firmicutes;Clostridia;Clostridiales;Lachnospiraceae	0.517507		0.00668107	0.00278079	0.0402354		0.0338493	0.00771605	0.0181538		0.00208655	0.00142258	0.00290875		0.25012	0.0603302	0.190184		0.00286993	0.00410931	0.00669994		0.0227912	0.0700429	0.0371526		0.173283	0.120792	0.0460099		0.169851	0.026159	0.0481665		0.00564436	0.00229484	0.00197297		0.0118165	0.00209608	0.0266922		0.0104677	0.00723554	0.00792487		0.0187961
CCTACGGGTGGCAGCAGTGGGGGATATTGCACAATGGAGGAAACTCTGATGCAGCGACGCCGCGTGAGGGAAGACGGTCTTCGGATTGTAAACCTCTGTCTTTAGGGACGAAAAAATGACGGTACCTAAGGAGGAAGCCACGGCTAACTACGTGCCAGCAGCCGCGGTAATACGTAGGTGGCAAGCGTTGTCCGGAATTACTGGGTGTAAAGGGAGCGTAGACGGTGAAGCAAGTCTGGAGTGAAAACCCGGGGCTTAACCCCGGGATTGCTTTGGAAACTGTTTAACTGGAGTGCAGGAGAGGTAAGCGGAATTCCTAGTGTAGCGGTGAAATGCGTAGATATTAGGAGGAACACCAGTGGCGAAGGCGGCTTACTGGACTGTAACTGACGTTGAGGC…	>denovo39780	Bacteria;Firmicutes;Clostridia;Clostridiales	0.516045		0.120259	0.0917661	0.125736		0.0369265	0.0385802	0.0998457		0.00208655	0.00142258	0.00145438						0.00286993	0.0123279	0.00669994		0.00759705		0.0178333		0.141777	0.0213162	0.120137						0.00112887		0.00197297						0.136081	0.127828	0.0118873		0.0281942
CCTACGGGGGGCAGCAGTGAGGAATATTGGTCAATGGTCGGCAGACTGAACCAGCCAAGTCGCGTGAAGGAAGACGGCCCTAAGGGTTGTAAACTTCTTTTGTCGGAGAGTAAAGGTCTTCACGAGTGGAGATTTGCAAGTATCCGAAGAAAAAGCATCGGCTAACTCCGTGCCAGCAGCCGCGGTAATACGGAGGATGCGAGCGTTATCCGGATTTATTGGGTTTAAAGGGAGCGCAGACGGGAGGGTAAGTCAGCTGTGAAAGTTTGCGGCTCAACCGTAAAATTGCAGTTGAAACTGTCTTTCTTGAGTGCGGCAGAGGCAGGCGGAATTCGTGGTGTAGCGGTGAAATGCTTAGATATCACGAAGAACTCCGATTGCGAAGGCAGCCTGCCGGGC…	>denovo62461	Bacteria;Bacteroidetes;Bacteroidia;Bacteroidales;Porphyromonadaceae;Barnesiella	0.513219											0.00142258	0.00727188																						0.00112887	0.00917936	0.00789188		0.457469	0.465331	0.513219
CTACGGGGGCAGCAGTGGGGAATATTGCACAATGGGGGAAACCCTGATGCAGCGACGCCGCGTGAGTGAAGAAGTACTTCGGTATGTAAAGCTCTATCAGCAGGGAAGAAAGTGACGGTACCTGAGTAAGAAGCACCGGCTAAATACGTGCCAGCAGCCGCGGTAATACGTATGGTGCAAGCGTTATCCGGATTTACTGGGTGTAAAGGGAGCGTAGACGGAAGAGCAAGTATGGAGTGAAAGCCCGGGGCTCAACCCCGGGACTGCTTTGGAAACTGTTTATCTAGAGTGCCGGAGAGGCAAGCGGAATTCCTAGTGTAGCGGTGAAATGCGTAGATATTAGGAGGAACACCAGTGGCGAAGGCAGCTTGCTGGACGGTAACTGACGTTGAGGCTCGA…	>denovo4906	Bacteria;Firmicutes;Clostridia;Clostridiales;Lachnospiraceae	0.509537		0.0155892	0.00556158			0.00923162	0.0154321											0.00286993	0.0369838	0.0234498		0.0151941	0.0304535	0.0014861																		0.00174462		0.00396244
CCTATGGGTGGCTGCAGTGGGGAATATTGCACAATGGGGGAAACCCTGATGCAGCGACGCCGCGTGAGTGAAGAAGTAATTCGTTATGTAAAGCTCTATCAGCAGGGAAGAAAGTGACGGTACCTGAGTAAGAAGCCCCGGCTAACTACGTGCCAGCAGCCGCGGTAATACGTAGGGGGCAAGCGTTATCCGGATTTACTGGGTGTAAAGGGAGTGTAGACGGCGATTCAAGTCTGAAGTGAAAGCCCGGCGCTCAACATCGGGACTGCTTTGGAAACTGTATAGCTGGAGTGCCGGAGAGGTAAGCGGAATTCCTAGTGTAGCGGTGAAATGCGTAGATATTAGGAGGAAAACCAGTGGCGAAGGCGGCTTACTGGACTGTAACTGACGTTGAGGCTC…	>denovo100486	Bacteria;Firmicutes;Clostridia;Clostridiales;Lachnospiraceae	0.507495			0.00278079	0.0150883			0.00771605											0.00286993						0.0014861						0.00283086	0.00201223											0.00174462				0.507495
CCTACGGGTGGCAGCAGTGAGGAATATTGGTCAATGGACGCAAGTCTGAACCAGCCATGCCGCGTGCAGGAAGACGGCTCTATGAGTTGTAAACTGCTTTTGTACGAGGGTAAACTCGATTACGCGTAATCGACTGAAAGTATCGTATGAATAAGGATCGGCTAACTCCGTGCCAGCAGCCGCGGTAATACGGAGGATCCAAGCGTTATCCGGATTTATTGGGTTTAAAGGGTGCGTAGGCGGTTTGATAAGTTAGAGGTGAAATACCGGGGCTTAACTCCGGAACTGCCTCTAATACTGTTGGGCTAGAGAGTAGTTGCGGTAGGCGGAATGTATGGTGTAGCGGTGAAATGCTTAGAGATCATACAGAACACCGATTGCGAAGGCAGCTTACCAAAC…	>denovo67839	Bacteria;Bacteroidetes;Bacteroidia;Bacteroidales;Rikenellaceae;Alistipes	0.501618				0.241412											0.00822684	0.0109721														0.212314	0.165003	0.237621
CCTAGGGCGGCTGCAGTGGGGAATATTGGGCAATGGGCGCAAGCCTGACCCAGCAACGCCGCGTGAAGGATGAAGGCTTTCGGGTTGTAAACTTCTTTTATCGGGGACGAAACAAATGACGGTACCTGATGAATAAGCCACGGCTAACTACGTGCCAGCAGCCGCGGTAATACGTAGGTGGCAAGCGTTATCCGGATTTACTGGGTGTAAAGGGCGTGTAGGCGGGACTGCAAGTCAGATGTGAAAACTATGGGCTCAACCCATAGCCTGCATTTGAAACTGTAGTTCTTGAGTGCTGGAGAGGCAATCGGAATGCCGTGTGTAGCGGTGAAATGCATAGAGATACGGAGGAACACCAGTGGCGAAGGCGGATTGCTGGACAGTAACTGACGCTGAGGC…	>denovo2162	Bacteria;Firmicutes;Clostridia;Clostridiales;Ruminococcaceae;Pseudoflavonifractor	0.49543		0.0155892	0.0444926	0.0251471		0.49543	0.0231481	0.0181538										0.0229595	0.0493117					0.00445831																			0.00482369			0.00469903
CCTACGGGGGGCTGCAGTGGGGAATATTGGGCAATGGGCGCAAGCCTGACCCAGCAACGCCGCGTGAAGGATGAAGGCTTTCGGGTTGTAAACTTCTTTTATCAGGGACGAAACAAATGACGGTACCTGATGAATAAGCCACGGCTAACTACGTGCCAGCAGCCGCGGTAATACGTAGGTGGCAAGCGTTATCCGGATTTACTGGGTGTAAAGGGCGTGTAGGCGGGACTGCAAGTCAGATGTGAAAACTATGGGCTCAACCCATAGCCTGCATTTGAAACTGCAGTTCTTGAGTACTGGAGAGGCAGACGGAATTCCTAGTGTAGCGGTGAAATGCGTAGATATTAGGAGGAACACCAGTGGCGAAGGCGGTCTGCTGGACAGCAACTGACGCTGAGG…	>denovo115472	Bacteria;Firmicutes;Clostridia;Clostridiales;Ruminococcaceae;Pseudoflavonifractor	0.492353		0.0155892	0.0278079			0.492353	0.0154321											0.0086098	0.0616396					0.0014861				0.00127805
CCTACGGGTGGCTGCAGTGGGGAATATTGCACAATGGGGGAAACCCTGATGCAGCGACGCCGCGTGAGCGAAGAAGTATCTCGGTATGTAAAGCTCTATCAGCAGGGAAGGAGATGACGGTACCTGACTAAGAAGCACCGGCTAAATACGTGCCAGCAGCCGCGGTAATACGTATGGTGCAAGCGTTATCCGGATTTACTGGGTGTAAAGGGAGCGTAGACGGAGAATCAAGTCTGGAGTGAGAGCCCGGGGCTCAACCCCGGGACTGCTTTGGAAACTGTGTGTCTAGAGTGCCGGAGAGGTAAGCGGAATTCCTAGTGTAGCGGTGAAATGCGTAGATATTAGGAGGAACACCAGTGGCGAAGGCGGCTTACTGGACGGTGACTGGCGTTGAGGCTC…	>denovo28600	Bacteria;Firmicutes;Clostridia;Clostridiales;Lachnospiraceae;Ruminococcus2	0.492091		0.0155892	0.00834237	0.0201177				0.00907688		0.171097	0.00853546	0.011635		0.0529101	0.0658147	0.0658328		0.0143497					0.0121814	0.0014861			0.00284216	0.0178927		0.00566171	0.00201223	0.00963329		0.0079021	0.00458968	0.0355135		0.0202569	0.0209608	0.0715837		0.319266	0.0192948	0.0435868		0.00469903
CCTACGGGTGGCTGCAGTGGGGAATATTGGGCAATGGGCGCAAGCCTGACCCAGCAACGCCGCGTGAAGGATGAAGGCTTTCGGGTTGTAAACTTCTTTTATTCGGGACGAAGAAAATGACGGTACCGAATGAATAAGCCACGGCTAACTACGTGCCAGCAGCCGCGGTAATACGTAGGTGGCAAGCGTTATCCGGATTTACTGGGTGTAAAGGGCGTGTAGGCGGGATTGCAAGTCAGATGTGAAAACCACGGGCTCAACCTGTGGCCTGCATTTGAAACTGCAGTTCTTGAGTACTGGAGAGGCAGACGGAATTCCTAGTGTAGCGGTGAAATGCGTAGATATTAGGAGGAACACCAGTGGCGAAGGCGGTCTGCTGGACAGCAACTGACGCTGAGG…	>denovo59182	Bacteria;Firmicutes;Clostridia;Clostridiales;Ruminococcaceae;Pseudoflavonifractor	0.480044		0.0155892	0.013904	0.0201177		0.480044	0.0154321	0.00907688										0.0086098	0.0780768	0.00334997																						0.00174462				0.00469903
CCTACGGGTGGCAGCAGTGGGGAATATTGCACAGTGGGGGAAACCCTGATGCAGCGACGCCGCGTGAGTGAAGAAGTATTTCGGTATGTAAAGCTCTATCAGCAGGGAAGAAAATGACGGTACCTGACTAAGAAGCCCCGGCTAACTACGTGCCAGCAGCCGCGGTAATACGTAGGGGGCAAGCGTTATCCGGATTTACTGGGTGTAAAGGGAGCGTAGACGTCAAGGCAAGTCTGAAGTGAAAGCCCGGGGCTTAACCGCGGGACTGCTTTGGAAACTGGCTGGCTGGAGTGCCGGAGAGGTAAGCGGACTTCCTAGTGTAGCGGTGAAATGCGTAGATATTAGGAGGAACACCAGTGGCGAAAGCGGCTTTCTGGACGACAACTGACGCTGAGGCGC…	>denovo95841	Bacteria;Firmicutes;Clostridia;Clostridiales;Lachnospiraceae	0.475436
CCTACGGGAGGCAGCAGTGGGGGATATTGCGCAATGGGGGGAACCCTGACGCAGCAACGCCGCGTGAAGGAAGAAGGTTTTCGGATCGTAAACTTCTTTAAGTGTGGAAGATAATGACGGTACACACAGAATAAGCCACGGCTAACTACGTGCCAGCAGCCGCGGTAATACGTAGGTGGCGAGCGTTGTCCGGATTTACTGGGTGTAAAGGGCGTGTAGGCGGGCATACAAGTCAGATGTGAAATACCGGGGCTCAACCCCGGGGCTGCATTTGAAACTGTATATCTTGAGTGTCGGAGAGGAAAGCGGAATTCCTAGTGTAGCGGTGAAATGCGTAGATATTAGGAGGAACACCAGTGGCGAAGGCGGCTTTCTGGACGATAACTGACGCTGAGGCGC…	>denovo112816	Bacteria;Firmicutes;Clostridia;Clostridiales;Ruminococcaceae	0.463928		0.0111351	0.00556158			0.0123088	0.0231481	0.0272306										0.0229595	0.0164372	0.0200998			0.00913604			0.005251						0.0032111				0.00197297						0.0261693	0.00241185	0.00792487
CCTACGGGAGGCAGCAGTGGGGAATATTGCACAATGGGGGAAACCCTGATGCAGCGACGCCGCGTGAGCGAAGAAGTATTTCGGTATGTAAAGCTCTATCAGCAGGGAAGAAGAAAGACGGTACCTGACTAAGAAGCCCCGGCTAACTACGTGCCAGCAGCCGCGGTAATACGTAGGGGGCAAGCGTTATCCGGATTTACTGGGTGTAAAGGGAGCGCAGACGGCATGGCAAGTCTGAAGTGAAAGGCATGGGCTCAACCCGTGGACTGCTTTGGAAACTGTCAGGCTAGAGTGTCGGAGAGGCAAGTGGAATTCCTAGTGTAGCGGTGAAATGCGTAGATATTAGGAGGAACACCAGTGGCGAAGGCGGCTTGCTGGACGATGACTGACGTTGAGGCT…	>denovo118694	Bacteria;Firmicutes;Clostridia;Clostridiales;Lachnospiraceae	0.462191		0.00668107	0.00834237	0.0251471		0.00615441	0.0231481	0.00907688							0.00274228	0.00365738			0.00410931																							0.00174462		0.00792487
CCTACGGGGGGCTGCAGTGGGGAATATTGCACAATGGGGGAAACCCTGATGCAGCGACGCCGCGTGAAGGAAGAAGTATCTCGGTATGTAAACTTCTATCAGCAGGGAAGAAAATGACGGTACCTGACTAAGAAGCCCCGGCTAATTACGTGCCAGCAGCCGCGGTAATACGTAAGGGGCAAGCGTTATCCGGATTTACTGGGTGTAAAGGGAGCGTAGACGGATGGACAAGTCTGATGTGAAAGGCGGGGGCCCAACCCCCGGACTGCATTGGAAACTGCCCGTCTTGAGTGCCGGAGAGGTAAGCGGAATTCCTAGTGTAGCGGTGAAATGCGTAGATATTAGGAGGAACACCAGTGGCGAAGGCGGCTTACTGGACGGTAACTGACGTTGAGGCTC…	>denovo86117	Bacteria;Firmicutes;Clostridia;Clostridiales;Lachnospiraceae;Blautia	0.462135		0.00445405	0.0278079	0.0251471		0.015386	0.0308642	0.0181538		0.00208655	0.00142258							0.0401791	0.0123279	0.0133999		0.00759705	0.00913604							0.00849257	0.0060367	0.0032111			0.00229484							0.0383817	0.0265303	0.0554741
CCTACGGGGGGCTGCAGTGGGGAATATTGCACAATGGGGGAAACCCTGATGCAGCGACGCCGCGTGAGCGAAGAAGTATTTCGGTATGTAAAGCTCTATCAGCAGGGAAGAAACTGACGGTACCTGACTAAGAAGCACCGGCTAAATACGTGCCAGCAGCCGCGGTAATACGTATGGTGCAAGCGTTATCCGGATTTACTGGGTGTAAAGGGAGCGTAGACGGCAGAGCAAGTCTGATGTGAAAGGCAGGGGCTCAACCCCTGGACTGCATTGGAAACTGTTCGGCTTGAGTGCCGGAGAGGTAAGCGGAATTCCTAGTGTAGCGGTGAAATGCGTAGATATTAGGAGGAACACCAGTGGCGAAGGCGGCTTACTGGACGGCAACTGACGTTGAGGCTC…	>denovo28861	Bacteria;Firmicutes;Clostridia;Clostridiales;Lachnospiraceae;Ruminococcus2	0.457543		0.0289513	0.052835	0.0553236		0.0400037	0.131173	0.0635382		0.00208655	0.00711288	0.00290875		0.02405	0.0164537	0.00731475		0.0114797	0.0205465	0.0368497			0.00913604	0.028236		0.220542	0.362375	0.457543		0.175513	0.128783	0.317899				0.00394594			0.00419217			0.0383817	0.0410014	0.0316995		0.0657864
CCTACGGGTGGCTGCAGTGGGGAATATTGCACGATGGGGGAAACCCTGATGCAGCGACGCCGCGTGAGTGAAGAAGTATTTCGGTATGTAAAGCTCTATCAGCAGGGAAGAAAATGACGGTACCTGACTAAGAAGCCCCGGCTAACTACGAGCCAGCAGCCGCGGTAATACGTAGGGGGCAAGCGTTATCCGGATTTACTGGATGTAAAGGGAGCGTAGACGGTAATGCAAGTCTGGAGTGAAAAACCGGGGCTCAACCCCGGGGCTCAACCCCGGGACTGCTTTGGAATCTGTATAACTGGAGTGCCGGAGAGGTAAGCGGAATTCCTAGTGGAGCTGTGAAATGCGTAGATATTAGGAGGAACACCAGTGGCGAAGGCGGCTTACTGGACGGTAACT…	>denovo98641	Bacteria;Firmicutes;Clostridia;Clostridiales;Lachnospiraceae;Ruminococcus2	0.453901		0.00890809	0.0361503	0.00502942		0.015386		0.00907688		0.0041731	0.00853546	0.00872626						0.0114797		0.00334997				0.00743052										0.00225774	0.00688452	0.00789188		0.00168808	0.00209608			0.00523387	0.0144711	0.00396244		0.00939805
CCTACGGGAGGCTGCAGTGGGGAATATTGGGCAATGGGCGCAAGCCTGACCCAGCAACGCCGCGTGAAGGAAGAAGGCTTTCGGGTTGTAAACTTCTTTTGTCAGGGACGAAGCAAGTGACGGTACCTGACGAATAAGCTCCGGCTAACTACGTGCCAGCAGCCGCGGTAATACGTAGGGAGCAAGCGTTATCCGGATTTACTGGGTGTAAAGGGCGTGTAGGCGGGATTGTAAGTCAGATGTGAAAACCAGGGGCTCAACCTCTGGCCTGCATTTGAAACTGCAGTTCTTGAGTACTGGAGAGGCAGACGGAATTCCTAGGGGAGCGGTGAAATGCGTAGATATTAGGAGGAACACCAGTGGCGAAGGCGGTCTGCTGGACAGCAACTGACGCTGAGG…	>denovo14854	Bacteria;Firmicutes;Clostridia;Clostridiales;Ruminococcaceae;Flavonifractor	0.451857		0.0757188	0.0723005	0.0100588		0.0123088	0.00771605											0.0114797	0.00821862	0.00669994		0.0911646	0.0365441	0.156041																		0.451857	0.00964739	0.0198122
CCTACGGGAGGCAGCAGTGAGGAATATTGGTCAATGGCCGTAAGGCTGAACCAGCCAAGTAGCGTGAAGGACGACGGCCCTACGGGTTGTAAACTTCTTTTATAAGGGAATAAAGTTGCGTACGCGTACGCATTTGCATGTACCTTATGAATAAGCATCGGCTAACTCCGTGCCAGCAGCCGCGGTAATACGGAGGATGCGAGCGTTATCCGGATTTATTGGGTTTAAAGGGTGCGTAGGCGGCATGACAAGTCAGCGGTGAAATGCCCGGGCTTAACCCGGGAGCTGCCGTTGAAACTGTCGAGCTAGCGTGCACAAGAGGTAGGCGGAATGCGTGGTGTAGCGGTGAAATGCATAGATATCACGCAGAACCCCGATTGCGAAGGCAGCCTACTAGGG…	>denovo13730	Bacteria;Bacteroidetes;Bacteroidia;Bacteroidales;Porphyromonadaceae;Barnesiella	0.45042										0.0041731	0.00711288	0.00436313																						0.45042	0.36488	0.416297		0.00337615	0.00419217	0.0072797
CCTACGGGAGGCTGCAGTGGGGAATATTGCACAATGGGGGAAACCCTGATGCAGCGACGCCGCGTGAAGGAAGAAGTATTTCGGTATGTAAACTTCTATCAGCAGGGAAGAAGAATGACGGTACCTGACTAAGAAGCCCCGGCTAACTACGTGCCAGCAGCCGCGGTAATACGTAGGGGGCAAGCGTTATCCGGATTTACTGGGTGTAAAGGGAGCGTAGGCGGCCCGGCAAGTCAGAAGTGAAAACCCAGGGCTTAACTCTGGGATTGCTTTTGAAACTGTCAGGCTCGATTGCCGGAGAGGTAAGTGGAATTCCTAGTGTAGCGGTGAAATGCGTAGATATTAGGAGGAACACCAGTGGCGAAGGCGGCTTACTGGACGGTAAATGACGCTGAGGCT…	>denovo26	Bacteria;Firmicutes;Clostridia;Clostridiales;Lachnospiraceae	0.450343		0.0356324	0.136259	0.0603531		0.0123088	0.00771605	0.00907688											0.00410931	0.0301497		0.00759705	0.00304535									0.0032111										0.00174462	0.00482369	0.0435868
CCTACGGGTGGCAGCAGTGGGGAATATTGGGCAATGGGCGCAAGCCTGACCCAGCAACGCCGCGTGAAGGAAGAAGGCTTTCGGGTTGTAAACTTCTTTTGTCGGGGACGAAACAAATGACGGTACCTGACGAATAAGCCACGGCTAACTACGTGCCAGCAGCCGCGGTAATACGTAGGTGGCAAGCGTTATCCGGATTTACTGGGTGTAAAGGGCGTGTAGGCGGGATTGCAAGTCAGATGTGAAAACTGGGGGCTCAACCTCCAGCCTGCATTTGAAACTGCAGTTCTTGAGTACTGGAGAGGCAGACGGAATTCCTAGTGTAGCGGTGAAATGCGTAGATATTAGGAGGAACACCAGTGGCGAAGGCGGTCTGCTGGACAGCAACTGACGCTGAGG…	>denovo5810	Bacteria;Firmicutes;Clostridia;Clostridiales;Ruminococcaceae;Flavonifractor	0.441461		0.00445405	0.00278079	0.00502942		0.0215404	0.0231481			0.0104328	0.00995803	0.0276331		0.19721	0.0932375	0.0841197			0.00410931	0.0167499		0.0151941	0.124859	0.0326943		0.15753	0.0852648	0.0383416		0.0368011	0.0301835	0.064222		0.0101598	0.00917936	0.00591891		0.0168808		0.0181992			0.00241185	0.0118873		0.00939805
CCTACGGGTGGCTGCAGTGGGGAATATTGCGCAATGGGGGCAACCCTGACGCAGCAACGCCGCGTGATTGAAGAAGGTCTTCGGATTGTAAAAATCTTTAATCAGGGACGAAGAAAATGACGGTACCTGAAGAATAAGCTCCGGCTAACTACGTGCCAGCAGCCGCGGTAATACGTAGGGAGCAAGCGTTATCCGGATTTACTGGGTGTAAAGGGCGTGTAGGCGGGCCTGTAAGTTGGGAGTGAAATCCGGGGGCTTAACCCCCGAACTGCTTTCAAAACTGCGGGTCTTGAGTGATGGAGAGGCAGGCGGAATTCCCAGTGTAGCGGTGAAATGCGTAGATATTGGGAGGAACACCAGTGGCGAAGGCGGCCTGCTGGACATTAACTGACGCTGAGG…	>denovo68314	Bacteria;Firmicutes;Clostridia;Clostridiales;Ruminococcaceae;Butyricicoccus	0.44095		0.44095	0.0166847	0.125736		0.0338493	0.0231481	0.0181538		0.0041731	0.00426773	0.00436313				0.00365738			0.00821862	0.00669994										0.00849257		0.0032111		0.00225774		0.00394594			0.00419217	0.00121328
CCTACGGGAGGCAGCAGTGGGGAATATTGGGCAATGGAGGAAACTCTGACCCAGCAACGCCGCGTGAATGATGAAGGTCTTCGGATTGTAAAGTTCTTTTCTAAGGGACGAAGAAAGTGACGGTACCTTAGGAATAAGCCTCGGCTAACTACGTGCCAGCAGCCGCGGTAATACGTAGGAGGCAAGCGTTATCCGGAATGACTGGGCGTAAAGGGTGCGTAGGTGGTTCAGCAAGTTGGCAGCGTAACTCCGGGGCTCAACCTCGGCACTACTGCCAAAACTGTCGAACTTGAGTGCAGGAGGGGCAATCGGAATTCCTAGTGTAGCGGTGGAATGCGTAGATATTAGGAGGAACACCAGTGGCGAAGGCGGATTGCTGGACTGTAACTGACACTGAGG…	>denovo63264	Bacteria;Firmicutes;Clostridia;Clostridiales	0.438156		0.0200432	0.0333695			0.00615441	0.00771605	0.0272306											0.00821862	0.0100499																							0.00241185
CCTACGGGGGGCAGCAGTGGGGAATATTGCGCAATGGGGGAAACCCTGATGCAGCAACGCCGCGTGAGTGAAGAAGTATCTCGGTATGTAAAGCTCTATCAGCAGGGAAGAAGATGACGGTACCTGACTAAGAGGCACCGGCTAAATACGTGCCAGCAGCCGCGGTAATACGTATGGTGCAAGCGTTATCCGGATTTACTGGGTGTAACGGGAGCGTAGACGGAAGAGCAAGTCTGGAGTGAAAGCCCGGGGCTCAACCCCGGGACTGCTTTGGAAACTGGTTATCTAGAGTGCCGGAGAGGCAAGCGGAATTCCTAGTGTAGCGGTGAAATGCGTAGATATTAGGAGGAACACCAGTGGCGAAGGCGGCTTGCTGGACGGTAACTGACGTTGAGGCTC…	>denovo125697	Bacteria;Firmicutes;Clostridia;Clostridiales;Lachnospiraceae;Clostridium XlVa	0.435136		0.00890809	0.00278079			0.00615441	0.0231481	0.0181538										0.00286993	0.0205465	0.0301497			0.00913604	0.0014861																		0.0104677	0.00723554
CTTACGGGAGGCTGCAGTGGGGAATATTGCACAATGGGGGAAACCCTGATGCAGCGACGCCGCGTGAAGGAAGAAGTATCTCGGTATGTAAACTTCTATCAGCAGGGAAGAAAATGACGGTACCTGACTAAGAAGCACCGGCTAAATACGTGCCAGCAGCCGCGGTAATACGTATGGTGCAAGCGTTATCCGGATTTACTGGGTGTAAAGGGAGCGTAGACGGATGGGCAAGTCTGAAGTGAAAGCCCGGGGCTCAACCCCGGGACTGCTTTGGGAACTGTTCATCTGGAGTGCTGGAGAGGTAAGTGGAATTCCTAGTGTAGCGGTGAAATGCGTAGATATTAGGAGGAACACCAGTGGCGAAGGCGGCTTACTGGACAGTAACTGACGTTGAGGCTC…	>denovo98213	Bacteria;Firmicutes;Clostridia;Clostridiales;Lachnospiraceae;Coprococcus	0.424935		0.00668107	0.00556158	0.00502942		0.0553897	0.0540123	0.245076		0.0333848	0.0128032	0.011635		0.02886	0.0164537	0.0658328		0.045919	0.0164372	0.00334997			0.0121814	0.0163472		0.010502	0.0071054	0.00894637		0.0452937	0.0241468	0.0288999		0.00338662	0.0252433	0.0256486		0.00337615	0.00419217	0.00121328		0.0453602	0.0168829	0.00792487		0.00469903
CCTACGGGTGGCAGCAGTCGGGAATATTGCGCAATGGAGGAAACTCTGACGCAGTGACGCCGCGTATAGGAAGAAGGTTTTCGGATTGTAAACTATTGTCGTTAGGGAAGAAAAAAGACAGTACCTAAGGAGGAAGCTCCGGCTAACTACGTGCCAGCAGCCGCGGTAATACGTAGGGAGCGAGCGTTATCCGGATTTATTGGGTGTAAAGGGTGCGTAGACGGGCTTGTAAGTTAGTTGTGAAATCCCTCGGCTTAACTGAGGAACTGCAACTAAAACTGTAAGTCTTGAGTGCAGGAGAGGTAAGTGGAATTCCTAGTGTAGCGGTGAAATGCGTAGATATTAGGAGGAACACCAGTGGCGAAGGCGACTTACTGGACTGTAACTGACGTTGAGGCA…	>denovo22992	Bacteria;Firmicutes;Clostridia;Clostridiales	0.418885		0.00222702	0.0194655	0.0100588		0.00307721		0.00907688			0.00426773	0.00145438																						0.00225774				0.00168808	0.00209608
CCTACGGGTGGCTGCAGTGGGGGATATTGCACAATGGAGGAAACTCTGACGCAGTGACGCCGCGTGCAGGAAGAAGGTTTTCGGATTGTAAACTGCTTTAGACAGGGAAGAAAAAGGACAGTACCTGTAGAATAAGCTCCGGCTAACTACGTGCCAGCAGCCGCGGTAATACGTAGGGAGCAAGCGTTATCCGGATTTATTGGGTGTAAAGGGTGCGTAGACGGGACATTAAGTTAGTTGTGAAATCCCTCGGCTCAACTGAGGAACTGCAACTAAAACTGATATTCTTGAGTGCTGGAGAGGAAAGGGGAATTCCTAGTGTAGCGGTGAAATGCGTAGATATTAGGAGGAACACCAGGGGCGAAGGCGACTTTCTGGACAGTAACTGACGTTGAGGCA…	>denovo122598	Bacteria;Firmicutes;Clostridia;Clostridiales	0.417887		0.00222702	0.00278079																	0.00334997																										0.00469903
CCTACGGGTGGCTGCAGTGGGGAATATTGCACAATGGGGGAAACCCTGATGCGGCGACGCCGCGTGAGTGAAGAAGTATTTCGGTATGTAAAGCTCTATCAGCAGGGAAGAAGATGACGGTACCTGAGTAAGAAGCCCCGGCTAACTACGTGCCAGCAGCCGCGGTAATACGTAGGGGGCAAGCGTTATCCGGATTTACTGGGTGTAAAGGGAGCGTAGACGGAGCAGCACGTCTGATGTGAAAGGCGGGGGCTCAACCCCCGGACTGCATTGGAAACTGCTGATCTTGAGTACCGGAGGGGTAAGCGGAATTCCTAGTGTAGCGGTGAAATGCGTAGATATTAGGAGGAACACCAGTGGCGAAGGCGGCTTACTGGACGGTAACTGACGGTGAGGCGC…	>denovo19699	Bacteria;Firmicutes;Clostridia;Clostridiales;Lachnospiraceae	0.416141		0.0267243	0.152943	0.0905296		0.0246177	0.0231481	0.0272306			0.00142258							0.416141	0.0904048	0.0971492		0.144344	0.0274081	0.0579581			0.0113686	0.0562343		0.00849257	0.0060367	0.0032111										0.0628064	0.062708	0.0673614		0.0563883
CCTACGGGGGGCTGCAGTGAGGAATATTGGTCAATGGGCGCAGGCCTGAACCAGCCACGTAGCGTGAAGGATGACTGCCCTATGGGTTGTAAACTTCTTTTATATGGGAATAAAGTTTTCCACGTGTGGAATTTTGTATGTACCATATGAATAAGGATCGGCTAACTCCGTGCCAGCAGCCGCGGTAATACGGAGGATCCGAGAGTTATTCGGATTTATTGGGTTTAAAGGGAGCGTAGGTGGCTTGTTAAGTCAGTTGTGAAAGTTTGCGGCTCAACCGGAAAATTGCAGTTGAGACTGGCAGTCTTGAGTACAGTAGAGGTGGGCGGAATTCGTGGTGTAGCGGTGAAATGCTTAGATATCACGAAGAACTCCGATTGCGAAGGCAGCTCACTAGAC…	>denovo2594	Bacteria;Bacteroidetes;Bacteroidia;Bacteroidales;Bacteroidaceae;Bacteroides	0.415888
CCTACGGGGGGCAGCAGTGAGGAATATTGGTCAATGGGCGCAGGCCTGAACCAGCCAAGTAGCGTGCAGGATGACTGCCCTATGGGTTGTAAACTTCTTTTATATGGGAATAAAGTTTTCCACGTGTGGAATTTTGTATGTACCATATGAATAAGGATCGGCTAACTCCGTGCCAGCAGCCGCGGTAATACGGAGGATCCGAGCGTTATCCGGATTTATTGGGTTTCAAGGGAGCGTAGGTGGATTGTTAAGTCAGTTGTGAAATTTTGCGGCTCAACCGTAAAATTGCAGTTGAAACTGGCAGTCTTGAGTACAGTAGAGGTGGGCAGAATTCGTGGTGAAGCGGTGAAATGCTTAGATATCACGAAGAACTCCGATTGCTAAGGCAGCTCACTAGAC…	>denovo31874	Bacteria;Bacteroidetes;Bacteroidia;Bacteroidales;Bacteroidaceae;Bacteroides	0.413729
CCTACGGGTGGCTGCAGTGGGGGATATTGCACAATGGGGGAAACCCTGATGCAGCGACGCCGCGTGGAGGAAGAAGGTTTTCGGATTGTAAACTCCTGTCGTACGGGACGATAATGACGGTACCGTACAAGAAAGCCACGGCTAACTACGTGCCAGCAGCCGCGGTAAAACGTAGGTGGCAAGCGTTGTCCGGAATTACTGGGTGTAAAGGGGGCGCAGGCGGGGCAGCAAGTTGGAAGTGAAATCTATGGGCTCAACCCATAAACTGCTTTCAAAACTGCTGTTCTTGAGTAGTGCAGGGGTAGGCGGAATTCCCGGTGTAGCGGTGGAATGCGTAGATATCGGGAGGAACACCAGTGGCGAAGGCGGCCTACTGGGCACCAACTGACGCTGAGGCTC…	>denovo38054	Bacteria;Firmicutes;Clostridia;Clostridiales;Ruminococcaceae	0.412975										0.00625965	0.00995803	0.0058175																						0.00112887	0.00688452	0.00789188		0.00337615	0.00209608	0.00121328
CCTACGGGTGGCTGCAGTGGGGGATATTGCACAATGGGGGAAACCCTGCTGCAGCGACGCCGCGTGAGCGAAGAAGTATTTCGGTATGTAAAGCTCTATCAGCAGGGAAGAAACTGACGGTACCTGACTAAGAAGCACCGGCTAAATACGTGCCAGCAGCCGCGGTAATACGTATGGTGCAAGCGTTATCCGGATTTACTGGGTGTAAAGGGAGCGTAGACGGATGTGCAAGTCTGGAGTGAAAGCCAGGGGCTCAACCCCGGGACTGCTTTGGAAACCGTAGATCTAGAGTGCTGGAGAGGTAAGTGGAATTCCTAGTGTAGCGGTGAAATGCGTAGCTATTAGGAGGAACACCAGTGGCGAAGGCGGCTTACTGGACAGTAACTGACGTTGAGGCTC…	>denovo37539	Bacteria;Firmicutes;Clostridia;Clostridiales;Lachnospiraceae;Ruminococcus2	0.412064		0.00445405	0.0111232	0.0150883		0.0492353	0.0462963	0.00907688						0.00481		0.00365738		0.00573987	0.0205465	0.0401997		0.12915	0.0395895	0.00445831		0.141777	0.0625275	0.0792393		0.127389	0.00804894	0.099544										0.00872311	0.190536	0.0277371		0.0234951
CCTACGGGAGGCAGCAGTAGGGAATTTTCGTCAATGGGGGGAACCCTGAACGAGCAATGCCGCGTGAGTGAAGAAGGTCTTCGGATCGTAAAGCTCTGTTGTAAGAGAAAAACGGACTCCATAGGGAATGATGGAGGAGTGATGGTATCTTACCAGAAAGCCACGGCTAACTACGTGCCAGCAGCCGCGGTAATACGTAGGTGGCGAGCGTTATCCGGAATCATTGGGCGTAAAGGGTGCGTAGGTGGCACGATAAGTCTGTAGTAAAAGGCAGCGGCTCAACCGCTGTTGGCTATGGAAACTGTCGAGCTGGAGTGCAGAAGAGGGCGATGGAATTCCATGTGTAGCGGTAAAATGCGTAGATATATGGAGGAACACCAGTGGCGAAGGCGGCCGCCT…	>denovo83531	Bacteria;Firmicutes;Erysipelotrichia;Erysipelotrichales;Erysipelotrichaceae;Erysipelotrichaceae_incertae_sedis	0.409973											0.00142258	0.00145438						0.0086098																0.00225774	0.00229484	0.00197297		0.00506423	0.00209608			0.0209355		0.0118873
CCTACGGGAGGCAGCAGTAGGGAATCTTCCACAATGGGCGCAAGCCTGATGGAGCAACACCGCGTGAGTGAAGAAGGGTTTCGGCTCGTAAAGCTCTGTTGTTGAAGAAGAATGTGCAAGAGAGTAACTGTTCTTGTATTGACGGTATTCAACCAGAAAGTCACGGCTAACTACGTGCCAGCAGCCGCGGTAATACGTAGGTGGCAAGCGTTATCCGGATTTATTGGGCGTAAAGCGAGCGCAGGCGGTTTTCTAAGTCTGATGTGAAAGCCTTCGGCTTAACCGAAGAAGTGCATCGGAAACTGGATGACTTGAGTGCAGAAGAGGGCAGTGGAACTCCATGTGTAGCGGTGGAATGCGTAGATATATGGAAGAACACCAGTGGCGAAGGCGGCTGCC…	>denovo35103	Bacteria;Firmicutes;Bacilli;Lactobacillales;Lactobacillaceae;Lactobacillus	0.409463																											0.00568432	0.00255611
CCTACGGGAGGCAGCAGTGGGGAATATTGCACAATGGGGGAAACCCTGATGCAGCAACGCCGCGTGAAGGAAGACGGTTTTCGGATTGTAAACTTCTGTTCTTAGTGAAGATAGTGACGGTAGCTAAGGAGCAAGCCACGGCTAACTACGTGCCAGCAGCCGCGGTAATACGTAGGTGGCAAGCGTTGTCCGGAATTACTGGGTGTAAAGGGAGCGCAGGCGGGGAGCCAAGTCAGCTGTGAAAACTACAGGCTTAACTTGTAGACTGCAGTTGAAACTGGTTTTCTTGAGTGAAGTAGAGGTTGGCGGAATTCCGAGTGTAGCGGTGAAATGCGTAGATATTCGGAGGAACACCGGTGGCGAAGGCGGCCAACTGGGCTTTAACTGACGCTGAGGCTC…	>denovo26478	Bacteria;Firmicutes;Clostridia;Clostridiales	0.407383		0.0378594	0.0444926	0.407383		0.0184632	0.0385802	0.0544613										0.0373091	0.0246558	0.0301497										0.00566171	0.00402447	0.0064222										0.0453602	0.0410014	0.063399
CGGGGGCAGCAGTGGGGAATATTGCACAATGGGGGAAACCCTGATGCAGCGACGCCGCGTGAGCGAAGAAGTATTTCGGTATGTAAAGCTCTATCAGCAGGGAAGAAATTGACGGTACCTGACTAAGAAGCACCGGCTAAATACGTGCCAGCAGCCGCGGTAATACGTATGGTGCAAGCGTTATCCGGATTTACTGGGTGTAAAGGGAGCGTAGACGGTGAAGCAAGTCTGGAGTGAAAACCCGGGGCTTAACCCCGGGATTGCTTTGGAAACTGTTTAACTGGAGTGCAGGAGAGGTAAGCGGAATTCCTAGTGTAGCGGTGAAATGCGTAGATATTAGGAGGAACACCAGTGGCGAAGGCGGCTTACTGGACTGTAACTGACGTTGAGGCTCGAAAG…	>denovo100949	Bacteria;Firmicutes;Clostridia;Clostridiales;Lachnospiraceae;Clostridium XlVa	0.403561		0.0200432	0.0111232	0.0855002		0.0215404	0.00771605	0.00907688		0.00208655	0.0455224	0.00290875		0.00481	0.0740416	0.0987492		0.0114797	0.0821862	0.0234498		0.0379853	0.0395895	0.121861		0.010502	0.122213	0.164869		0.0452937	0.0422569	0.0545887		0.00225774	0.00688452			0.0101285	0.00838434			0.0244247	0.0385896	0.0118873		0.296039
CCTACGGGCGGCTGCAGTGGGGGATATTGCACAATGGGCGCAAGCCTGATGCAGCGACGCCGCGTGAGGGAAGACGGTCTTCGGATTGTAAACCTCTGTCTTCGGGGACGATAATGACGGTACCCGAGGAGGAAGCCACGGCTAACTACGTGCCAGCAGCCGCGGTAATACGTAGGTGGCGAGCGTTGTCCGGAATTACTGGGTGTAAAGGGAGCGTAGACGGCAAGGCAAGTCTGAAGTGAAAGCCCGGGGCTTAACCGCGGGACTGCTTTGGAAACTGTCTGGCTGGAGTGCCGGAGAGGTAAGCGGAATTCCTAGTGTAGCGGTGAAATGCGTAGATATTAGGAGGAACACCAGTGGCGAAGGCGGCTTACTGGACGGTAACTGACGTTGAGGCTC…	>denovo45572	Bacteria;Firmicutes;Clostridia;Clostridiales;Ruminococcaceae	0.4034															0.00274228								0.0152267				0.00426324																0.00241185
CCTACGGGCGGCAGCAGTGGGGAATATTGCACGATGGGGGAAACCCTGATGCAGCGACGCCGCGTGAGCGAAGAAGTATTTCGGTATGTAAAGCTCTATCAGCAGGGAAGAAACTGACGGTACCTGACTAAGAAGCACCGGCTAAATACGTGCCAGCAGCCGCGGTAATACGTAGGTGGCAAGCGTTATCCGGATTTACTGGGTGTAAAGGGAGCGTAGACGGCGAAGCAAGTCTGAAGTGAAAGCCCGGGGCTCAACCGCGGGACTGCTTTGGAAACTGTTTTGCTAGAGTGCTGGAGAGGTAAGTGGAATTCCTAGTGTAGCGGTGAAATGCGTAGATATTAGGAGGAACACCAGTGGCGAAGGCGGCTTACTGGACTGTAGCTGACGTTGAGGCTC…	>denovo121108	Bacteria;Firmicutes;Clostridia;Clostridiales;Lachnospiraceae;Clostridium XlVa	0.40308		0.00445405	0.00278079							0.0208655	0.0654385	0.0538119		0.16835	0.068557	0.109721											0.119371	0.0460099						0.0383816	0.0596659	0.0434053		0.00168808	0.00628825	0.00121328			0.00241185
CCTACGGGTGGCAGCAGTGGGGAATATTGCACAATGGGGGAAACCCTGATGCAGCGACGCCGCGTGAGTGAAGAAGTATTTCGGTATGTAAAGCTCTATCAGCAGGGAAGAAGATGACGGTACCTGAGTAAGAAGCCCCGGCTAACTACGTGCCAGCAGCCGCGGTAATACGTAGGGGGCAAGCGTTATCCGGATTTACTGGGTGTAAAGGGAGCGTAGACGGTGAAGCAAGTCTGGAGTGAAAACCCGGGGCTTAACCCCGGGATTGCTTTGGAAACTGTTTAACTGGAGTGCAGGAGAGGTAAGCGGAATTCCTAGTGTAGCGGTGAAATGCGTAGAGATCGGGAGGAACACCAGTGGCGAAGGCGGCCTGCTGGGCCTTAACTGACGCTGAGGCAC…	>denovo31369	Bacteria;Firmicutes;Clostridia;Clostridiales;Lachnospiraceae	0.400452		0.0445405	0.10567	0.0653825		0.0246177	0.0231481	0.0907688			0.0113806				0.00822684	0.00731475		0.0947078	0.123279	0.164149		0.250703	0.194902	0.236291		0.294056	0.0909491	0.143142			0.108661	0.0128444		0.00112887	0.00688452	0.00197297		0.021945	0.0104804			0.0767634	0.135063	0.150573		0.131573
CCTACGGGAGGCAGCAGTAGGGAATATTGCACAATGGGGGAAACCCTGATGCAGCGACGCCGCGTGAGCGAAGAAGTATCTCGGTATGTAAAGCTCTATCAGCAGGGAAGAAGATGACGGTACCTGACTAAGAAGCACCGGCTAAATACGTGCCAGCAGCCGCGGTAATACGTATGGTGCAAGCGTTATCCGGATTTACTGGGTGTAAAGGGAGCGTAGACGGAAGAGCCAGTCTGGAGTGAAAGCCCGGGGCTCAACCCCGGGACAGCTTTGGAAACTGTTTATCTAGAGTGCCGGAGAGGCAAGCGGAATTCCTAGTGTAGCGATGAAATGCGTAGATATTAGGAGAAACACCAGTAGAGAAGGCGGCTTGCTGGACGGTAACTGACGTTGAGGCTC…	>denovo27667	Bacteria;Firmicutes;Clostridia;Clostridiales;Lachnospiraceae;Ruminococcus2	0.399062		0.00222702																	0.00410931	0.00334997
CCTACGGGAGGCAGCAGTGGGGAATATTGCACAATGGGGGAAACCCTGATGCAGCGACGCCGCGTGAGTGAAGAAGTATTTCGGTATGTAAAGCTCTATCAGCAGGGAAGAAAATGACGGTACCTGACTAAGAAGCCCCGGCTAACTACGTGCCAGCAGCCGCGGTAATACGTAGGGGGCAAGCGTTATCCGGATTTACTGGGTGTAAAGGGAGCGTAGACGGAAGGGCAAGTCTGGAGTGAAAGCCCGGGGCTCAACCCCGGGACTGCTTTGGAAACTGTCCGTCTTGAGTGCCGGAGAGGTAAGCGGAATTCCTAGTGTAGCGGTGAAATGCGTAGATATTAGGAGGAACACCAGTGGCGAAGGCGGCTTTCTGGACTGTAACTGACGCTGAGGCTC…	>denovo14964	Bacteria;Firmicutes;Clostridia;Clostridiales;Lachnospiraceae	0.398361		0.00222702		0.00502942			0.0154321	0.00907688				0.00436313			0.0109691			0.00286993		0.00669994		0.0151941	0.0121814	0.00445831			0.00284216	0.00255611		0.00283086	0.00804894	0.0032111		0.00225774	0.00229484	0.00197297		0.00168808					0.00482369			0.00469903
CCTACGGGGGGCTGCAGTGAGGAATATTGGTCAATGGCCGAGAGGCTGAACCAGCCAAGTCGCGTGAGGGATGAAGGTTCTATGGATCGTAAACCTCTTTTGTAAGGGAATAAAGTGCGGGACGTGTCCCGGTTTGTATGTACCTTATGAATAAGGATCGGCTAACTCCGTGCCAGCAGCCGCGGTAATACGGAGGCTCCGAGCGTTATCCGGATTTATTGGGTTTAAAGGGTGCGTAGGCGGCCTTTTAAGTCAGCGGTGAAAGTCTGTGGCTCAACCATAGAATTGCCGTGGAAACTGGGGGGCTTGAGTATGTTTGAGGCAGGCGGAATGCGTGGTGTAGCGGTGAAATGCATAGATATCACGAAGAACCCCGATTGCGAAGGCAGCCTGCCAAGC…	>denovo45635	Bacteria;Bacteroidetes;Bacteroidia;Bacteroidales;Porphyromonadaceae;Parabacteroides	0.397922											0.00142258	0.00145438																						0.00112887		0.00197297		0.00337615		0.00242657
CCTACGGGTGGCAGCAGTGAGGAATATTGGTCAATGGGCGTAAGCCTGAACCAGCCAAGTCGCGTGAGGGATGAAGGTTCTATGGATCGTAAACCTCTTTTATAAGGGAATAAAGTGCGGGACGTGTCCCGTTTTGTATGTACCTTATGAATAAGGATCGGCTAACTCCGTGCCAGCAGCCGCGGTAATACGGAGGATCCGAGCGTTATCCGGATTTATTGGGTTTAAAGGGTGCGTAGGCGGCCTTTTAAGTCAGCGGTGAAAGTCTGTGGCTCAACCATAGAATTGCCGTTGAAACTGGGAGGCTTGAGTATGTTTGAGGCAGGCGGAATGCGTGGTGTAGCGGTGAAATGCATAGATATCACGCAGAACCCCGATTGCGAAGGCAGCCTACTAGGG…	>denovo22074	Bacteria;Bacteroidetes;Bacteroidia;Bacteroidales;Porphyromonadaceae;Parabacteroides	0.397827										0.00208655	0.00142258	0.00145438																								0.00197297		0.00168808	0.00419217	0.00121328
CCTACGGGAGGCAGCAGTGGGGAATATTGCGCAATGGGGGAAACCCTGACGCAGCAACGCCGCGTGCAGGAAGAAGGTCTTCGGATTGTAAACTGTTGTCGCGAGGGAAGAAGAAAGTGACGGTACCTCGTGAGAAAGTCACGGCTAACTACGTGCCAGCAGCCGCGGTAATACGTAGGTGACAAGCGTTGTCCGGATTTACTGGGTGTAAAGGGCGCGTAGGCGGACCGGCAAGTCAGGAGTGAAATACCGGGGCTCAACCCCGGGGCTGCTTTTGAAACTGTCGGCCTTGAGTATCGGAGAGGAAAGCGGAATTCCCAGTGTAGCGGTGAAATGCGTAGATATTGGGAGGAACACCAGTGGCGAAGGCGGCTTTCTGGACGACAACTGACGCTGAGG…	>denovo90871	Bacteria;Firmicutes;Clostridia;Clostridiales;Ruminococcaceae	0.392295		0.260562	0.0111232	0.392295		0.00615441		0.0181538							0.00274228				0.00410931											0.00283086	0.00804894											0.00174462	0.00241185
CTTACGGGGGGCAGCAGTGGGGAATATTGCACAATGGGGGAAACCCTGATGCAGCGACGCCGCGTGAGTGAAGAAGTATTTCGGTATGTAAAGCTCTATCAGCAGGGAAGAAACTGACGGTACCTGACTAAGAAGCACCGGCTAAATACGTGCCAGCAGCCGCGGTAATACGTATGGTGCAAGCGTTATCCGGATTTACTGGGTGTAAAGGGAGCGTAGACGGCAAAGCAAGTCTGAAGTGAAAGCCCGGGGCTCAACCCCGGGACTGCTTTGGAAACTGTTCTGCTAGAGTGCTGGAGAGGTAAGCGGAATTCCTAGTGTAGCGGTGAAATGCGTAGATATTAGGAGGAACACCAGTGGTGAAGGCGGCTTACTGGACAGTAACTGACGTTGAGGCTC…	>denovo7285	Bacteria;Firmicutes;Clostridia;Clostridiales;Lachnospiraceae	0.390427		0.0356324	0.0333695	0.0150883		0.0584669	0.0231481	0.0363075		0.0208655	0.036987	0.0436313		0.0673401	0.0219382	0.0621754		0.00286993	0.0164372	0.0133999		0.0607764	0.0609069	0.014861		0.073514	0.0937913	0.047288		0.0141543	0.00201223	0.0866996		0.0169331	0.0550762	0.0434053		0.0101285	0.0167687	0.0121328		0.0122124	0.0144711	0.00792487		0.00939805
CCTACGGGGGGCAGCAGTGGGGAATATTGCACAATGGGGGAAACCCTGATGCAGCGACGCCGCGTGAGCGAAGAAGTATTTCGGTATGTAAAGCTCTATCAGCAGGGAAGAAACTGACGGTACCTGACTAAGAAGCACCGGCTAAATACGTGCCAGCAGCCGCGGTAATACGTATGGTGCAAGCGTTATCCGGATTTACTGGGTGTAAAGGGAGCGTAGACGGAGCAGCAAGTCTGGAGTGAAAACCCGGGGCTCAACCCCGGGACTGCTTTGGAAACTGTTGTTCTAGAGTGCTGGAGAGGTAAGTGGAATTCCTAGTGTAGCGGTGGAATGCGTAGATATTAGGAGGAACATCGGTGGCGAAGGCGACTTACTGGACTGTAACTGACACTGAGGCAC…	>denovo57173	Bacteria;Firmicutes;Clostridia;Clostridiales;Lachnospiraceae	0.388251		0.00222702	0.00278079	0.0150883		0.00307721	0.00771605			0.0125193	0.0412547	0.0319963		0.00481	0.0274228	0.0694902							0.0152267	0.00445831		0.005251	0.108002	0.118859			0.00402447	0.00963329		0.0135465	0.00917936	0.0256486		0.00506423	0.0125765	0.00242657		0.00174462				0.0516893
CCTACGGGAGGCAGCAGTGGGGGATATTGCACAATGGGGGAAACCCTGATGCAGCGACGCCGCGTGAGGGAAGACGGCCTTCGGGTTGTAAACCTCTGTCTTAGGGGACGAAGGAAGTGACGGTACCCTGAGAGGAAGCTCCGGCTAACTACGTGCCAGCAGCCGCGGTAATACGTAGGGAGCGAGCGTTGTCCGGAATTACTGGGTGTAAAGGGAGCGTAGGCGGGGTTGCAAGTTGAATGTGAAACCTACCGGCTTAACTGGTAGACTGCGTTCAAAACTGCAATTCTTGAGTGAAGTAGAGGCAGGCGGAATTCCTAGTGTAGCGGTGAAATGCGTAGATATTAGGAGGAACACCAGTGGCGAAGGCGGCCTGCTGGGCTTAAACTGACGCTGAGG…	>denovo44547	Bacteria;Firmicutes;Clostridia;Clostridiales;Ruminococcaceae	0.383429		0.0178162																		0.00334997						0.010502	0.00426324	0.00639027														0.00174462
CCTCGGGAGGCTGCAGTGGGGAATATTGCACAATGGGGGAAACCCTGATGCAGCGACGCCGCGTGAGCGAAGAAGTATTTCGGTATGTAAAGCTCTATCAGCAGGGAAGAAACTGACGGTACCTGACTAAGAAGCACCGGCTAAATACGTGCCAGCAGCCGCGGTAATACGTATGGTGCAAGCGTTATCCGGATTTACTGGGTGTAAAGGGAGCGTAGACGGATGTGCAAGTCTGGAGTGAAAGCCCGGGGCTTAACCCCGGGACTGCTTTGGAAACTGCCATGCTGGAGTGCTGGAGAGGTAAGTGGAATTCCTAGTGTAGCGGTGAAATGCGTAGATATTAGGAGGAACACCAGTGGCGAAGGCGGCTTACTGGACAGTAACTGACGTTGAGGCTCG…	>denovo97153	Bacteria;Firmicutes;Clostridia;Clostridiales;Lachnospiraceae;Ruminococcus2	0.380788			0.0166847	0.0150883		0.0276949	0.231481	0.00907688							0.0411342	0.0438885		0.00286993		0.00334997			0.00304535	0.0014861						0.019816	0.0100612	0.0353221				0.00197297						0.013957	0.00241185
CCTACGGGAGGCAGCAGTGGGGGATATTGCACAATGGGGGAAACCCTGATGCAGCGACGCCGCGTGAGTGAAGAAGTATTTCGGTATGTAAAGCTCTATCAGCAGGGACGAAAATGACGGTACCTGAGTAAGAAGCCCCGGCTAACTACGTGCCAGCAGCCGCGGTAATACGTAGGGGGCAAGCGTTATCCGGATTTACTGGGTGTAAAGGGAGCGTAGACGGCGAAGCAAGTCTGAAGTGAAAGCCCGGGGCTCAACCGCGGGACTGCTTTGGAAACTGTTTTGCTGGAGTGCTGGAGAGGCAGGCGGAATTCCTAGTGTAGCGGTGAAATGCGTAGATATTAGGAGGAACACCAGTGGCGAAGGCGGCCTGCTGGACAGTAACTGACGTTGAGGCTC…	>denovo103633	Bacteria;Firmicutes;Clostridia;Clostridiales;Lachnospiraceae;Clostridium XlVa	0.377207		0.0178162	0.0305887	0.377207		0.0369265	0.0231481				0.00284515				0.00548456	0.0109721			0.0205465	0.0200998							0.00142108	0.00127805		0.00849257	0.0120734	0.0064222		0.00112887	0.0114742	0.00986485			0.00209608				0.00241185	0.00792487
CCTACGGGGGGCAGCAGTGGGGAATATTGCACAATGGGGGAAACCCTGATGCAGCAACGCCGCGTGAAGGAAGAAGGTTTTCGGATCGTAAACTTCTATCAATAGGGACGAAAGAAATGACGGTACCTAAATAAGAAGCCCCGGCTAACTACGTGCCAGCAGCCGCGGTAATACGTAGGGGGCAAGCGTTATCCGGAATTACTGGGTGTAAAGGGAGCGTAGGCGGCATGGTAAGCCAGATGTGAAAGCCTTAGGCTTAACTTGAGGATTGCATTTGGAACTATCAAGCTAGAGTACAGGAGAGGAAAGCGGAATTCCTAGTGTAGCGGTGAAATGCGTAGATATTAGGAAGAACACCAGTGGCGAAGGCGGCTTTCTGGACTGAAACTGACGCTGAGG…	>denovo29921	Bacteria;Firmicutes;Clostridia;Clostridiales;Lachnospiraceae;Clostridium XlVb	0.376769			0.00278079															0.0114797		0.00334997							0.0071054	0.00766832														0.00697849	0.00723554	0.00792487
CCTACGGGTGGCTGCAGTGGGGAATATTGGGCAATGGGCGCAAGCCTGACCCAGCAACGCCGCGTGAAGGATGAAGGCTTTCGGGTTGTAAACTTCTTTTGACAGGGACGAACAAGGTGACGGTACCTGTCGAATAAGCTCCGGCTAGCTACGTGCCAGCAGCCGCGGTAATACGTAGGGAGCAAGCGTTATCCGGATTTACTGGGTGTAAAGGGCGTGTAGGCGGGCTGGCAAGTCAGATGTGAAAACCATGGGCTCAACCCATGGCCTGCATTTGAAACTGTTGGTCTTGAGTGCTGGAGAGGCAATCGGAATTCCGTGTGTAGCGGTGAAATGCGTAGATATACGGAGGAACACCAGTGGCGAAGGCGGATTGCTGGACAGTAACTGACGCTGAGG…	>denovo120004	Bacteria;Firmicutes;Clostridia;Clostridiales;Ruminococcaceae;Pseudoflavonifractor	0.371089		0.106897	0.00278079	0.0301765														0.0114797												0.0169851	0.00201223	0.0064222										0.0191908	0.0265303	0.0118873
CCTACGGGTGGCAGCAGTGGGGAATATTGCACAATGGGGGAAACCCTGATGCAGCGACGCCGCGTGAGCGAAGAAGTATTTCGGTATGTAAAGCTCTATCAGCAGGGAAGAAAATGACGGTACCTGACTAAGAAGCACCGGCTAAATACGTGCCAGCAGCCGCGGTAATACGTATGGTGCAAGCGTTATCCGGATTTACTGGGTGTAAAGGGAGCGTAGACGGATGGGCAAGTCTGAAGTGAAAGCCCGGGGCTCAACCCCGGGACTGCTTTGGAAACTGTTCATCTGGAGTGCTGGAGAGGTAAGTGGAATTCCTAGTGTAGCGGTGAAATGCGTAGATATTAGGAGGAACACCAGTGGCGAAGGCGGCTTACTGGACGGTAACTGACGTTGAGGCTC…	>denovo21658	Bacteria;Firmicutes;Clostridia;Clostridiales;Lachnospiraceae;Ruminococcus2	0.36855			0.00278079	0.0100588			0.00771605	0.0453844		0.0792889	0.0213386	0.00727188		0.00481	0.0383919	0.029259		0.00573987		0.00669994			0.0334988							0.0226469	0.0100612	0.0256888		0.00677323	0.0114742	0.0157838		0.00337615	0.00209608	0.00121328		0.0401263	0.00241185	0.00792487
CCTACGGGGGGCAGCAGTAGGGAATCTTCCACAATGGGCGCAAGCCTGATGGAGCAACGCCGCGTGAGTGAAGAAGGTCTTCGGATCGTAAAACTCTGTTGTTAGAGAAGAACATGCAGGAGAGTAACTGTTCTTGTATTGACGGTATCTAACCAGAAAGCCACGGCTAACTACGTGCCAGCAGCCGCGGTAATACGTAGGTGGCAAGCGTTGTCCGGATTTATTGGGCGTAAAGGGAACGCAGGCGGTCCTTTAAGTCTGATGTGAAAGCCTTCGGCTTAACCGAAGAATTGCATTGGAAACTGGAGGACTTGAGTGCAGAAGAGGAGAGTGGAACTCCATGTGTAGCGGTGAAATGCGTAGATATATGGAAGAACACCAGTGGCGAAAGCGGCTCTC…	>denovo16761	Bacteria;Firmicutes;Bacilli;Lactobacillales;Lactobacillaceae;Lactobacillus	0.367793																										0.005251
CTTACGGGCGGCTGCAGTGGGGAATATTGCACAATGGGGGAAACCCTGATGCAGCGACGCCGCGTGAGCGAAGAAGTATTTCGGTATGTAAAGCTCTATCAGCAGGGAAGAAACTGACGGTACCTGACTAAGAAGCACCGGCTAAATACGTGCCAGCAGCCGCGGTAATACGTATGGTGCAAGCGTTATCCGGATTTACTGGGTGTAAAGGGAGCGTAGACGGAGCAGCAAGTCTGGAGTGAAAACCCGGGGCTCAACCCCGGGACTGCTTTGGAAACTGTTTATCTAGAGTGCCGGAGAGGCAAGCGGAATTCCTAGTGTAGCGGTGAAATGCGTAGATATTAGGAGGAACACCGGTGGCGAAGGCGGCTTGCTGGACGGTAACTGACGTTGAGGCTC…	>denovo25204	Bacteria;Firmicutes;Clostridia;Clostridiales;Lachnospiraceae;Ruminococcus2	0.367498		0.0267243	0.0278079			0.00923162	0.00771605	0.00907688		0.0125193	0.0128032	0.00872626		0.01443	0.00548456	0.0512033			0.00410931	0.00669994			0.00609069	0.00297221			0.00142108	0.0178927				0.00963329		0.00338662	0.00458968	0.00986485		0.00675231	0.0146726			0.00348924	0.0120592	0.00792487		0.00469903
CCTACGGGTGGCTGCAGTGGGGAATATTGCACTATGGGGGAAACCCTGATGCAGCGACGCCGCGTGAGTGAAGAAGTATTTCGGTATGTAAAGCTCTATCAGCAGGGAAGAAAATGACGGTACCTGACTAATAAGCCCCGGCTAACTACGTGCCAGCAGCCGCGGTAATACGTAGGGGGCAAGCGTTATCCGGAATTACTGGGTGTAAAGGGTGCGTAGGTGGCGGGGCAAGTCAGAAGTGAAAACCCGGGGCTCAACTCCGGGACTGCTTTTGAAACTGGCCAGCTGGAGTGCAGGAGAGGTAAGCGGAATTCCTAGTGTAGCGGTGAAATGCGTAGATAGTAGGAGGAACATCAGTGGCGAAGGCGGCTTACTGGACTGAAACTGACACTGAGGCAC…	>denovo136674	Bacteria;Firmicutes;Clostridia;Clostridiales;Lachnospiraceae;Anaerostipes	0.362727				0.0201177				0.00907688							0.00548456			0.0229595		0.00334997		0.00759705								0.00566171	0.00201223	0.00963329		0.00112887								0.0418709	0.0217066	0.0277371
CCTACGGGTGGCAGCAGTGGGGAATATTGCACAATGGGGGAAACCCTGATGCAGCGACGCCGCGTGAGTGAAGAAGTATTTCGGTATGTAAAGCTCTATCAGCAGGGAAGAAGATGACGGTACCTGAGTAAGAAGCCCCGGCTAACTACGTGCCAGCAGCCGCGGTAATACGTAGGGGGCAAGCGTTATCCGGATTTACTGGGTGTAAAGGGAGCGTAGACGGTGAAGCAAGTCTGATGTGAAAGGCAGGGGCTCAACCCCTGGACTGCATTGGAAACTGTTCGGCTTGAGTGCCGGAGAGGTAAGCGGAATTCCTAGTGTAGCGGTGAAATGCGTAGATATTAGGAGGAACACCAGTGGCGAAGGCGGCTTACTGGACGGCAACTGACGTTGAGGCTC…	>denovo48809	Bacteria;Firmicutes;Clostridia;Clostridiales;Lachnospiraceae	0.358366		0.0334053	0.052835	0.0553236		0.0338493	0.0848765	0.0272306			0.00569031	0.00145438			0.0246805	0.00365738		0.0717484	0.0698582	0.334997		0.0303882	0.0274081	0.0906524		0.283554	0.198951	0.323347		0.0226469	0.332019	0.0834885			0.00229484				0.00209608			0.0593172	0.0988857	0.0950985		0.126874
CCTACGGGAGGCAGCAGTGGGGAATATTGGGCAATGGGCGCAAGCCTGACCCAGCAACGCCGCGTGAAGGAAGAAGGCCCTCGGGTTGTAAACTTCTTTTGTCAGGGACGAAGCAAGTGACGGTACCTGACGAATAAGCCACGGCTAACTACGTGCCAGCAGCCGCGGTAATACGTAGGTGGCAAGCGTTGTCCGGATTTACTGGGTGTAAAGGGCGTGCAGCCGGGCTGGTAAGTCAGATGTGAAATCTGGAGGCTCAACCTCCAAACTGCATTTGAAACTGCTGGTCTTGAGTACCGGAGAGGTTATCGGAATTCCTTGTGTAGCGGTGAAATGCGTAGATATAAGGAAGAACACCAGTGGCGAAGGCGGATAACTGGACGGCAACTGACGGTGAGG…	>denovo11125	Bacteria;Firmicutes;Clostridia;Clostridiales;Ruminococcaceae;Oscillibacter	0.357063		0.0289513	0.0639582	0.0150883		0.0861618	0.0385802	0.0453844						0.0625301	0.00822684	0.0219443		0.0258294	0.156154	0.0100499		0.0455823	0.0304535	0.0193194		0.036757	0.125055	0.0600685		0.0254777	0.0060367	0.0385332		0.00112887				0.00168808		0.00242657		0.0226801	0.0385896	0.0118873		0.0281942
CCTACGGGAGGCAGCAGTGGGGGATATTGCACAATGGGGGAAACCCTGATGCAGCAACGCCGCGTGAAGGAAGAAGGTCTTCGGATTGTAAACTTCTGTCCTCAGGGAAGATAATGACGGTACCTGAGGAGGAAGCTCCGGCTAACTACGTGCCAGCAGCCGCGGTAATACGTAGGTGGCAAGCGTTATCCGGATTTACTGGGTGTAAAGGGCGTGTAGGCGGGATTGCAAGTCAGATGTGAAAACCACGGGCTCAACCTGTGGCCTGCATTTGAAACTGCAGTTCTTGAGTACTGGAGAGGCAGACGGAATTCCTAGTGTAGCGGTGAAATGCGTAGATATTAGGAGGAACACCAGTGGCGAAGGCGGTCTGCTGGACAGCAACTGACGCTGAGGCGC…	>denovo105987	Bacteria;Firmicutes;Clostridia;Clostridiales;Ruminococcaceae;Clostridium IV	0.354646		0.00445405	0.00278079			0.0246177								0.01924	0.0521033			0.00286993	0.00410931				0.00304535	0.0208055		0.115522	0.119371	0.0817954		0.00566171	0.0100612	0.0128444		0.00225774										0.00396244
CTACGGGAGGCTGCAGTGGGGGATATTGCACAATGGGGGAAACCCTGATGCAGCGACGCCGCGTGAGTGAAGAAGTATTTCGGTATGTAAAGCTCTATCAGCGGGGAAGAGAATGACGGTACCTGAGTAAGAAGCCCCGGCTAACTACGTGCAAGCAGCCGCGGTAATACGTAGGGGGCAAGCGTTATCCGGATTTACTGGGTGTAAAGGGAGCGTAGACGGCAAAGCAAGTCTGAAGTGAAAGCCCGGGGCTCAACCCCGGGACTGCTTTGGAAACTGTTTATCTAGAGTGCTGGAGAGGTAAGTGGAATTCCTAGTGTAGCGGTGAAATGCGTAGATATTAGGAGGAACACCAGTGGCGAAGGCGGCTTACTGGACAGTAACTGACGTTGAGGCTCG…	>denovo75651	Bacteria;Firmicutes;Clostridia;Clostridiales;Lachnospiraceae	0.354277		0.0311783	0.0305887	0.0150883		0.0953934	0.0308642	0.0181538		0.0354714	0.0241838	0.0261788		0.0865801	0.0164537	0.0219443		0.0229595	0.0246558	0.0234498		0.0683735	0.0669976	0.0267499		0.057761	0.0738962	0.047288		0.00566171	0.0060367	0.0866996		0.00903098	0.107858	0.069054		0.0236331	0.0125765	0.0145594		0.0157016	0.0506488	0.0158497		0.0328932
CCTACGGGTGGCTGCAGTGGGGAATATTGCACAATGGGGGAAACCCTGATGCAGCGACGCCGCGTGAGTGAAGAAGTATTTCGGTATGTAAAGCTCTATCAGCAGGGAAGAAGATGACGGTACCTGACTAAGAAGCTCCGGCTAAATACGTGCCAGCAGCCGCGGTAATACGTATGGAGCAAGCGTTATCCGGATTTACTGGGTGTAAAGGGAGCGTAGACGGCGAGGCAAGTCTGATGTGAAAGGCAGGGGCTTAACCCCTGGACTGCATTGGAAACTGTCAGGCTAGAGTGCCGGAGAGGTAAGCGGAATTCCTAGTGTAGCGGTGAAATGCGTAGATATTAGGAGGAACACCAGTGGCGAAGGCGGCTTACTGGACGGTAACTGACGTTGAGGCTC…	>denovo125229	Bacteria;Firmicutes;Clostridia;Clostridiales;Lachnospiraceae;Lachnospiracea_incertae_sedis	0.353998		0.00890809	0.00556158			0.00307721		0.353998
CCTACGGGGGGCAGCAGTGGGGAATATTGGGCAATGGGCGCAAGCCTGACCCAGCAACGCCGCGTGAAGGATGAAGGCTTTCGGGTTGTAAACTTCTTTTATCAGGGACGAAACAAATGACGGTACCTGATGAATAAGCCACGGCTAACTACGTGCCAGCAGCCGCGGTAATACGTAGGTGGCAAGCGTTATCCGGATTTACTGGGTGTAAAGGGCGTGTAGGCGGGACTGCAAGTCAGATGTGAAAACTATGAGCTCAACCCATAGCCTGTATTTGAAACTGTAGTTCTTGAGTGCTGGAGAGGCAATCGGAATTCCGTGTGTAGCGGTGAAATGCATAGATATACGGAGGAACACCAGTGGCGAAGGCGGATTGCTGGACAGTAACTGACGCTGAGG…	>denovo41776	Bacteria;Firmicutes;Clostridia;Clostridiales;Ruminococcaceae;Pseudoflavonifractor	0.353636		0.0200432	0.0278079	0.0201177		0.166169	0.0231481	0.00907688										0.0172196	0.0493117	0.00334997				0.0014861																			0.00482369			0.00469903
CCTACGGGGGGCAGCAGTGGGGAATATTGGGCAATGGGCGCAAGCCTGACCCAGCAACGCCGCGTGAAGGAAGAAGGCCCTCGGGTTGTAAACTTCTTTTGTCAGGGACGAAGCAAGTGACGGTACCTGACGAATAAGCCACGGCTAACTACGTGCCAGCAGCCGCGGTAATACGTAGGGGGCAAGCGTTATCCGGATTTACTGGGTGTAAAGGGAGCGTAGACGGCGAAGCAAGTCTGGTGTGAAAACCCGGGGCTCAACCCCGGGCCTGCATTGGAAACTGTTTTGCTTGAGTGCCGGAGAGGTAAGCGGAATTCCTAGTGTAGCGGTGAAATGCGTAGATATTAGGAGGAACACCAGTGGCGAAGGCGGCTTACTGGACGGCAACTGACGTTGAGG…	>denovo78314	Bacteria;Firmicutes;Clostridia;Clostridiales;Lachnospiraceae	0.34873		0.00668107	0.0194655	0.00502942		0.123088	0.0231481	0.0363075			0.00142258			0.0962001	0.0356496	0.0109721		0.0086098	0.0575303	0.00669994		0.00759705	0.0243628	0.00297221			0.00284216							0.00564436				0.00168808		0.00242657		0.0104677	0.031354	0.0118873		0.0140971
CCTACGGGGGGCTGCAGTGGGGAATATTGGGCAATGGGGGAAACCCTGATGCAGCGACGCCGCGTGAGCGAAGAAGTATTTCGGTATGTAAAGCTCTATCAGCAGGGAAGAAAATGACGGTACCTGACTAAGAAGCACCGGCTAAATACGTGCTAGCAGCCGCGGTAATACGTATGGTGCAAGCGTTATCCGGATTTACTGGGTGTAAAGGGAGCGTAGACGGATGGGCAAGTCTGAAGTGAAAGCCCGGGGCTCAACCCCGGGACTGCTTTGGAAACTGTTTAGCTGGAGTGCTGGGGAGGTAAGTGGAATTCCTAGTGTAGCGGTGAAATGCGTAGAGATTAGGAGGAACACCAGTGGCGAAGGCGGCTTACTGGACAGTAACTGACGTTGAGGCTC…	>denovo110700	Bacteria;Firmicutes;Clostridia;Clostridiales;Lachnospiraceae;Ruminococcus2	0.348456			0.00278079	0.00502942		0.00307721	0.00771605	0.0181538		0.0125193	0.00142258	0.0058175		0.00481	0.00274228	0.0109721			0.0123279	0.00334997				0.0014861						0.0113234	0.0060367	0.0192666										0.00697849		0.0118873
CCTACGGGTGGCAGCAGTAGGGAATTTTCGGCAATGGGCGAAAGCCTGACCGAGCAACGCCGCGTGAACGAAGAAGGTCTTCGGATCGTAAAGTTCTGTTATCGGGGAAGAGAGGCGGATGCAGGGAATGGTATCCGAGAGGACGGTACCCGATGAGGAAGCCACGGCTAACTACGTGCCAGCAGCCGCGGTAAAACGTAGGTGGCGAGCGTTATCCGGAATTATTGGGCGTAAAGAGGGAGCAGGCGGTCGTGAAGGTCCACTGGTAAAAGACCGGGGCTAAACCCCGGTAGGCCGAGGAAACCGTACGACTAGAGTACAGCAGAGGATCGTGGAATTCCATGTGTAGCGGTGAAATGCGTAGATATATGGAGGAACACCAGTGGCGAAGGCGACGAT…	>denovo31834	Bacteria;Firmicutes;Erysipelotrichia;Erysipelotrichales;Erysipelotrichaceae	0.347373			0.0639582	0.0251471														0.0143497	0.00821862				0.0121814				0.0071054	0.00511221			0.0060367	0.0064222		0.00225774				0.021945				0.00523387	0.00723554
CCTACGGGAGGCAGCAGTGGGGAATATTGCACAATGGGCGCAAGCCTGATGCAGCCATGCCGCGTGTGTGAAGAAGGCCTTCGGGTTGTAAAGCACTTTCAGCGGGGAGGAAGGCGTTAAGGTTAATAACCTTGGCGATTGACGTTACCCGCAGAAGAAGCACCGGCTAACTCCGTGCCAGCAGCCGCGGTAATACGGAGGGTGCAAGCGTTAATCGGAATTACTGGGCGTAAAGCGCACGCAGGCGGTCTGTCAAGTCGGATGTGAAATCCCCGGGCTCAACCTGGGAACTGCATTCGAAACTGGCAGGCTAGAGTCTTGTAGAGGGGGGTAGAATTCCAGGTGTAGCGGTGAAATGCGTAGAGATCTGGAGGAATACCGGTGGCGAAGGCGGCCCCC…	>denovo132155	Bacteria;Proteobacteria;Gammaproteobacteria;Enterobacteriales;Enterobacteriaceae;Klebsiella	0.346262																		0.00286993				0.20512	0.0395895	0.346262																		0.00523387	0.0265303	0.00396244		0.00939805
CCTACGGGTGGCTGCAGTGGGGGATATTGCACAGTGGGGGAAACCCTGATGCAGCGACGCCGCGTGAGTGAAGAAGTATTTCGGTATGTAAAGCTCTATCAGCAGGGAAGAGAATGACGGTACCTGAGTAAGAAGCCCCGGCTAACTACGTGCCAGCAGCCGCGGTAATACGTAGGGGGCAAGCGTTATCCGGATTTACTGGGGGTAAAGGGAGCGTAGACGGCAAAGCAAGTCTGAAGTGAAAGCACGGGGCTCAACCCCGGGACTGCTTTGGAAACTTTTCTGCTAGAGTGCTGGAGAGGTAAGCGGAATTCCTATTGTAGCGGTGAAATGCGTAGATATTAGGAGGAACACCAGTGGCGAAGGCGGCTTACTGGACAGTAACTGACGTTGAGGCTC…	>denovo27375	Bacteria;Firmicutes;Clostridia;Clostridiales;Lachnospiraceae	0.342813		0.0378594	0.0222463	0.00502942		0.0646213		0.0181538		0.0542503	0.0142258	0.0392682		0.02405	0.0164537	0.00731475		0.0573987	0.00410931	0.00334997		0.0683735	0.103542	0.00297221		0.078765	0.0468957	0.0319513		0.00283086	0.00201223	0.0738552		0.018062	0.0711401	0.0335405		0.00675231	0.00209608	0.0072797		0.00872311	0.0265303	0.0396244		0.0234951
TGGGGGCTGCAGTGGGGAATATTGCACAATGGGGGAAACCCTGATGCAGCGACGCCGCGTGAGTGAAGAAGTATTTCGGTATGTAAAGCTCTATCAGCAGGGAAGAAAATGACGGTACCTGACTAAGAAGCTCCGGCTAACTACGTGCCAGCAGCCGCGGTAATACGTAGGGGGCAAGCGTTATCCGGATTTACTGGGTGTAAAGGGAGCGTAGACGGAAGGGCAAGTCTGGAGTGAAAGCCCGGGGCTCAACCCCGGGACTGCTTTGGAAACTGTCCGTCTTGAGTGCCGGAGAGGTAAGCGGAATTCCTAGTGTAGCGGTGAAATGCGTAGATATTAGGAGGAACACCAGTGGCGAAGGCGGCTTACTGGACGGTAACTGACGTTGAGGCTCGAAAG…	>denovo20025	Bacteria;Firmicutes;Clostridia;Clostridiales;Lachnospiraceae	0.340731			0.00278079	0.0402354		0.0184632	0.0462963			0.0292117	0.0142258	0.00436313		0.01924	0.200186	0.168239		0.0114797	0.0287652	0.0468996		0.00759705	0.0121814	0.0951107		0.010502	0.0909491	0.0894637		0.0764331	0.0784771	0.0288999		0.00338662	0.0275381	0.0118378		0.00675231	0.0209608	0.00363985		0.00523387	0.00241185	0.00792487		0.0516893
CTTACGGGTGGCTGCAGTGGGGAATATTGGGCAATGGGCGCAAGCCTGACCCAGCAACGCCGCGTGAAGGAAGAAGGCTTTCGGGTTGTAAACTTCTTTTGTCAGGGAACAGTAGAAGAGGGTACCTGACGAATAAGCCACGGCTAACTACGTGCCAGCAGCCGCGGTAATACGTAGGTGGCAAGCGTTGTCCGGATTTACTGGGTGTAAAGGGCGTGCAGCCGGGCTGGTAAGTCAGATGTGAGATCCGTGGGCTTAACCCACGAACTGCATTTGAAACTGCTGGTCTTGAGTACCGGAGAGGTTATCGGAATTCCTTGTGTAGCGGTGAAATGCGTAGATATAAGGAGGAACACCAGTGGCGAAGGCGGCTTACTGGACGGTAACTGACGTTGAGGC…	>denovo27159	Bacteria;Firmicutes;Clostridia;Clostridiales;Ruminococcaceae;Oscillibacter	0.339506		0.0445405	0.00834237	0.0301765		0.00615441	0.339506	0.00907688			0.00142258								0.0205465													0.0032111										0.00174462		0.00792487
TCTACGGGGGGCAGCAGTGGGGAATATTGCACAATGGGGGAAACCCTGATGCAGCGACGCCGCGTGAGCGAAGAAGTATTTCGGTATGTAAAGCTCTATCAGCAGGGAAGAAATTGACGGTACCTGACTAAGAAGCACCGGCTAAATACGTGCCAGCAGCCGCGGTAATACGTATGGTGCAAGCGTTATCCGGATTTACTGGGTGTAAAGGGAGCGTAGACGGAGCAGCAAGTCTGGAGTGAGAACCCGGGGCTCAACCCCGGGACTGCTTTGGAAACTGTTGTTCTAGAGTGCTGGGGAGGTAAGTGGAATTCCTAGTGTAGCGGTGACATGCGTAGATATTAGGAGGAACACCAGTGGCGAAGGCGGCTTACTGGACAGTAACTGACGTTGAGACTC…	>denovo89463	Bacteria;Firmicutes;Clostridia;Clostridiales;Lachnospiraceae;Ruminococcus2	0.337838		0.00222702		0.00502942						0.0041731	0.09389	0.0392682			0.00274228	0.029259				0.00334997			0.00609069				0.0213162	0.0140586		0.00566171				0.00903098	0.0114742	0.0118378		0.00168808	0.00419217			0.00174462				0.0516893
CCTACGGGTGGCTGCAGTAGGGAATATTGCACAATGGGGGAAACCCTGATGCAGCGACGCCGCGTGAGCGAAGAAGTATCTCGGGATGTAAAGCTCTATCAGCAGGGAAGAAGATGACGGTACCTGACTAAGAAGCACCGGCTAAATACGTGCCAGCAGCCGCGGTAATACGTAGGGTGCAAGCGTTATCCGGATTTACTGGTTGTAAAGGGAGCGTAGACGGAAGAGCAAGTCTGGAGTGAAAGCCCGGGGCTCAACCCCGGTACTGCTTTGGAAACTTGTTATCTAGAGTGCCGGAGAGGCAAGCGGAATTCCTAGTGTAGCGGTGAAATGCGTAGATATTAGGAGGAACACCAGTGGCGAAGGCGGCTTGCTGGACGGTAACTGACGTTGAGGCTC…	>denovo113072	Bacteria;Firmicutes;Clostridia;Clostridiales;Lachnospiraceae	0.331424		0.00668107	0.00556158			0.00615441	0.00771605												0.00821862
CCTACGGGGGGCTGCAGTGGGGAATATTGCACAATGGGGGAAACCCTGATGCAGCGACGCCGCGTGAGCGAAGAAGTATTTCGGTATGTAAAGCTCTATCAGCAGGGAAGAAACTGACGGTACCTGACTAAGAAGCACCGGCTAAATACGTGCCAGCAGCCGCGGTAATACGTATGGTGCAAGCGTTATCCGGAATTACTGGGTGTAAAGGGTGCGTAGGTGGCAGGGCAAGTCAGAAGTGAAAACCCGGGGCTTAACTCCGGGACTGCTTTTGAAACTGTCCAGCTGGAGTGCAGGAGAGGTAAGCGGAATTCCTAGTGTAGCGGTGAAATGCGTAGATATTAGGAGGAACATCAGTGGCGAAGGCGGCTTACTGGACTGAAACTGACACTGAGGCAC…	>denovo37321	Bacteria;Firmicutes;Clostridia;Clostridiales;Lachnospiraceae;Anaerostipes	0.330626		0.0178162	0.0194655	0.00502942		0.00923162	0.00771605	0.0453844		0.00208655	0.00142258				0.0109691	0.0109721		0.0143497				0.0227912	0.0334988	0.00445831		0.015753	0.0255794	0.0217269		0.0566171	0.0181101	0.064222		0.00112887	0.00229484	0.00394594						0.0436156	0.0530606	0.0158497		0.0234951
CCTACGGGAGGCAGCAGTGGGGAATATTGGGCAATGGGCGCAAGCCTGACCCAGCAACGCCGCGTGAAGGAAGAAGGCCCTCGGGTTGTAAACTTCTTTTGTCAGGGACGAAGCAAGTGACGGTACCTGACGAATAAGCCACGGCTAACTACGTGCCAGCAGCCGCGGTAATACGTAGGTGGCAAGCGTTGTCCGGAATTACTGGGTGTAAAGGGAGCGTAGGCGGGAAGACAAGTTGAATGTTTAAACTATCGGCTTAACCGGTAGTCGCGTTCAAAACTGTTTTTCTTGAGTGAAGTAGAGGCAGGCGGAATTCCTAGTGTAGCGGTGAAATGCGTAGATATTAGGAGGAACACCAGTGGCGAAGGCGGCCTGCTGGGCTTTAACTGACGCTGAGGC…	>denovo104156	Bacteria;Firmicutes;Clostridia;Clostridiales;Ruminococcaceae;Clostridium IV	0.329337						0.00615441		0.00907688						0.00481	0.0274228	0.0219443		0.00573987								0.021004	0.0213162	0.0281172		0.00283086	0.00201223	0.0256888										0.00697849
CCTACGGGAGGCAGCAGTGGGGGATATTGCACAATGGGGGAAACCCTGATGCAGCAACGCCGCGTGAAGGAAGACGGTTTTCGGATTGTAAACTTCTGTTCTTAGTGACGATAATGACGGTAGCTAAGGAGAAAGCTCCGGCTAACTACGTGCCAGCAGCCGCGGTAATACGTAGGGAGCGAGCGTTGTCCGGAATTACTGGGTGTAAAGGGAGCGTAGGCGGGAGATCAAGTCAGATGTGAAAACTATGGGCTCAACCCATAACCTGCATTTGAAACTGGTTTTCTTGAGTGAAGTAGAGGCAGGCGGAATTCCGAGTGTAGCGGTGAAATGCGTAGATATTCGGAGGAACACCAGTGGCGAAGGCGGCCTGCTGGGCTTTTACTGACGCTGAGGCTC…	>denovo62332	Bacteria;Firmicutes;Clostridia;Clostridiales;Ruminococcaceae;Clostridium IV	0.329052		0.00222702	0.00278079			0.00615441	0.00771605	0.0363075						0.00962001	0.0575879	0.0182869		0.00286993	0.00410931	0.0100499			0.0548162			0.042008	0.0682119	0.0268391			0.00201223											0.0174462
CCTACGGGAGGCTGCAGTGGGGAATATTGCACAATGGGGGAAACCCTGATGCAGCGACGCCGCGTGAGTGAAGAAGTATTTCGGTATGTAAAGCTCTATCAGCAGGGAAGAAAATGACGGTACCTGACTAAGAAGCCCCGGCTAACTACGTGCCAGCAGCCGCGGTAATACGTAGGGGGCAAGCGTTATCCGGATTTACTGGGTGTAAAGGGAGCGTAGACGGAAGGGCAAGTCTGGAGTGAAAGCCCGGGGCTCAACCCCGGGACTGCTTTGGAAACTGTCCGTCTTGAGTGCCGGAGAGGTAAGCGGAATTCCTAGTGTAGCGGTGAAATGCGTAGATATTAGGAGGAACACCAGTGGCGAAGGCGGTCTGCTGGACAGCAACTGACGCTGAGGCGC…	>denovo14335	Bacteria;Firmicutes;Clostridia;Clostridiales;Lachnospiraceae	0.328723		0.0133621	0.0222463	0.0150883		0.120011	0.123457	0.0907688		0.0125193	0.0142258	0.0305419		0.23088	0.068557	0.193841		0.0200895	0.0205465	0.0100499		0.0379853	0.0944057	0.0386387		0.036757	0.0454746	0.0498441		0.0509554	0.0563426	0.0449554		0.0158042	0.0367175	0.0217027		0.0185688	0.0188648			0.00348924	0.0192948	0.0198122		0.0422912
CCTACGGGTGGCAGCAGTGGGGAATATTGCACAATGGGGGAAACCCTGATGCAGCGACGCCGCGTGAGCGAAGAAGTATTTCGGTATGTAAAGCTCTATCAGCAGGGAAGAAAGTGCCGGTACCTGACTAAGAAGCACTGGCTAAATACGTGCCAGCAGCCGCGGTAATACGTATGGTGCAAGCGTTATCCGGATTCACTGGGGGTAAAGGGAGCGTAGACGGAGCAGCAAGTCTGGAGTGAAAACCCGGGGCTCAACCCCGAGACTGCTTTGGAAACTGTTGTTCTAGAGTGCTGGAGAGGTAAGTGGAATTCCTAGTGTAGCGGTGAAATGCGTAGATATTAGGAGGAACACCAGTGGCGAAGGCGGCTTACTGGGCAGTAACTGACGTTGAGGCTC…	>denovo129274	Bacteria;Firmicutes;Clostridia;Clostridiales;Lachnospiraceae;Ruminococcus2	0.325088		0.00890809	0.00834237	0.0201177		0.00615441	0.00771605			0.0250386	0.197738	0.0509032		0.02886	0.0274228	0.102407							0.0274081	0.00445831		0.005251	0.0341059	0.0447319		0.00849257	0.00402447	0.00963329		0.0485415	0.00458968	0.0177567		0.00337615	0.0188648	0.00242657						0.0328932
GGCGGCTGCAGTGGGGAATATTGCACAATGGGGGAAACCCTGATGCAGCGACGCCGCGTGAGCGAAGAAGTATCTCGGTATGTAAAGCTCTATCAGCAGGGAAGAAAATGACGGTACCTGACTAAGAAGCACCGGCTAAATACGTGCCAGCAGCCGCGGTAATACGTATGGTGCAAGCGTTATCCGGATTTACTGGGTGTAAAGGGAGCGTAGACGGAGAAGCAAGTCTGGAGTGAAAACCCGGGGCTCAACCCCGGGACTGCTTTGGAAACTGTTTTTCTTGAGTGCCGGAGAGGTAAGCGGAATTCCTAGTGTAGCGGTGAAATGCGTAGATATTAGGAGGAACACCAGTGGCGAAGGCGGCTTACTGGACTGTAACTGACGTTGAGGCTCGAAAGC…	>denovo51865	Bacteria;Firmicutes;Clostridia;Clostridiales;Lachnospiraceae	0.323966				0.0804708		0.00615441				0.0083462					0.0329074	0.0694902			0.0493117	0.0267998				0.0267499			0.0255794	0.0600685		0.0424628	0.0181101	0.0224777						0.00168808		0.00242657						0.0704854
CCTACGGGTGGCAGCAGTGAGGAATATTGGTCAATGGCCGAGAGGCTGAACCAGCCAAGTCGCGTGAAGGATGAAGGATCTATGGTTTGTAAACTTCTTTTATAGGGGAATAAAGTGTGGGACGTGTTCCATTTTGTATGTACCCTATGAATAAGCATCGGCTAACTCCGTGCCAGCAGCCGCGGTAATACGGAGGATCCGAGCGTTATCCGGATTTATTGGGTTTAAAGGGAGCGTAGGTGGATTGTTAAGTCAGTTGTGAAAGTTTGCGGCTCAACCGTAAAATTGCAGTTGAAACTGGCAGTCTTGAGTACAGTAGAGGTGGGCGGAATTCGTGGTGTAGCGGTGAAATGCTTAGATATCACGAAGAACTCCGATTGCGAAGGCAGCTCACTAGAC…	>denovo132854	Bacteria;Bacteroidetes;Bacteroidia;Bacteroidales;Bacteroidaceae;Bacteroides	0.323289
CCTACGGGAGGCTGCAGTCGGGAATATTGCGCAATGGAGGAAACTCTGACGCAGTGACGCCGCGTGCAGGAAGAAGGTTTTCGGATTGTAAACTGCTTTAGACAGGGAAGAAAAAGGACAGTACCTGTAGAATAAGCTCCGGCTAACTACGTGCCAGCAGCCGCGGTAATACGTAGGGGGCAAGCGTTATCCGGATTTACTGGGTGTAAAGGGAGCGTAGACGGTGAAGCAAGTCTGGAGTGAAAACCCGGGGCTTAACCCCGGGATTGCTTTGGAAACTGTTTAACTGGAGTGCAGGAGAGGTAAGCGGAATTCCTAGTGTAGCGGTGAAATGCGTAGATATTAGGAGGAACACCAGTGGCGAAGGCGGCTTACTGGACTGTAACTGACGTTGAGGCT…	>denovo57454	Bacteria;Firmicutes;Clostridia;Clostridiales;Lachnospiraceae	0.318986		0.0111351	0.194655	0.236383		0.00307721		0.00907688		0.00208655									0.0123279												0.00402447											0.303564	0.0120592	0.00792487
CCTACGGGAGGCAGCAGTGGGGGATATTGCACAATGGGGGAAACCCTGATGCAGCAACGCCGCGTGAAGGAAGAAGGTCTTCGGATTGTAAACTTCTGTCCTCAGGGAAGATAATGACGGTACCTGAGGAGGAAGCTCCGGCTAACTACGTGCCAGCAGCCGCGGTAATACGTAGGGGGCAAGCGTTATCCGGATTTACTGGGTGTAAAGGGAGCGTAGACGGTGAAGCAAGTCTGGAGTGAAAACCCGGGGCTTAACCCCGGGATTGCTTTGGAAACTGTTTAACTGGAGTGCAGGAGAGGTAAGCGGAATTCCTAGTGTAGCGGTGAAATGCGTAGATATTAGGAGGAACACCAGTGGCGAAGGCGGCTTACTGGACTGTAACTGACGTTGAGGCTC…	>denovo21188	Bacteria;Firmicutes;Clostridia;Clostridiales;Lachnospiraceae	0.318308			0.00834237	0.00502942		0.0307721	0.0385802	0.00907688							0.0383919	0.00365738		0.0143497	0.00821862	0.0468996		0.00759705	0.0395895	0.120374		0.10502	0.123634	0.205767		0.00283086	0.0804894	0.0160555		0.00225774				0.00675231	0.00209608			0.0296586	0.00723554	0.0198122
CCTACGGGCGGCTGCAGTGAGGAATATTGGTCAATGGGCGCAGGCCTGAACCAGCCAAGTAGCGTGAAGGATGACTGCCCTATGGGTTGTAAACTTCTTTTATATGGGAATAAAGTTTTCCACGTGTGGAATTTTGTATGTACCATATGAATAAGGATCGGCTAACTCCGTGCCAGCAGCCGCGGTAATACGGAGGATCCGAGCGTTATCCGGATTTATTGGGTTTAAAGGGAGCGTAGGTGGATTGTTAAGTCAGTTGTGAAAGTTTGCGGCTCAACCGTAAAATTGCAGTTGAAGCTGGCAATCTTGAGTACAGTAGAGGTGTGCGGAATTCGTGGTGTAGCTGTAAAATGCTTAGATATCACGAAGAACTCCGATTGCGAAGGCAGCTCACTAGAC…	>denovo135840	Bacteria;Bacteroidetes;Bacteroidia;Bacteroidales;Bacteroidaceae;Bacteroides	0.317305																																				0.00197297
CCTATGGGAGGCTGCAGTGGGGAATATTGCACAATGGGGGAAACCCTGATGCAGCGACGCCGCGTGAGCGAAGAAGTATTTCGGTATGTAAAGCTCTATCAGCAGGGAAGAAATTGACGGTACCTGACTAAGAAGCACCGGCTAAATACGTGCCAGCAGCCGCGGTAATACGTATGGTGCAAGCGTTATCCGGATTTACTGGGTGTAAAGGGAGCGTAGGCGGAGCAGCAAGTCTGGGGTGGAAACCCGGGGCTCAACCCCGGGACTGCTTTGGAAACTGTTGTTCTAGAGTGCTGGAGAAGTAAGTGGGATTCCTAGTGTAGCGGTGAAATGCGTAGATATTAGGAGGAACACCAGTGGCGAAGGCGGCTTACTGGACAGTAACTGACGTTGAGGCTC…	>denovo46207	Bacteria;Firmicutes;Clostridia;Clostridiales;Lachnospiraceae;Ruminococcus2	0.316192		0.0111351		0.0150883		0.00307721	0.0385802			0.0208655	0.288783	0.034905		0.01443	0.0137114	0.0329164			0.00410931			0.00759705	0.0152267	0.00743052		0.010502	0.0284216	0.0549563		0.00283086	0.00201223			0.0158042	0.013769	0.0177567		0.0185688	0.0188648	0.00121328				0.00396244		0.0939805
CCTACGGGGGGCAGCAGTGGGGAATATTGCACAATGGGGGAAACCCTGATGCAGCAACGCCGCGTGAAGGAAGAAGTATTTCGGTATGTAAACTTCTATCAGCAGGGAAGAAGAAAGTGACGGTACCTGACTAAGAAGAACCGGCTAAATACGTGCCAGCAGCCGCGGTAATACGTATGGTTCAAGCGTTATCCGGATTTACTGGGTGTAAAGGGTGAGTAGGCGGTTATGCAAGTCACATGTGAAATGTCGGGGCTCAACTCCGGCCTGCATGAGAAACTGTATAACTAGAGTGCAGGAGAGGCAAGCGGAATTCCTAGTGTAGCGGTGAAATGCGTAGATATTAGGAAGAACACCGGTGGCGAAGGCGGCTTGCTGGACTGTAACTGACGCTGAGTC…	>denovo23798	Bacteria;Firmicutes;Clostridia;Clostridiales;Lachnospiraceae	0.311476		0.0267243	0.0723005	0.0855002			0.0617284	0.00907688							0.0274228			0.0114797	0.00821862	0.00334997		0.00759705	0.0121814	0.0118888		0.089267	0.190425	0.213435		0.104742	0.0704282	0.311476										0.0244247	0.0530606	0.0435868		0.0563883
CCTACGGGGGGCAGCAGTGGGGAATATTGGGCAATGGGCGCAAGCCTGACCCAGCAACGCCGCGTGAAGGAAGAAGGCTTTCGGGTTGTAAACTTCTTTTGTCAGGGAACAGTAGAGGAGGGTACCTGACGAATAAGCCACGGCTAACTACGTGCCAGCAGCCGCGGTAATACGTAGGTGGCAAGCGTTGTCCGGATTTACTGGGTGTAAAGGGCGTGCAGCCGGGCTGGTAAGTCAGATGTGAAATCCGTTGGCTTAACCCACGAACTGCAGTTGAAACTGCTGGTCTTGAGTACCGGAGAGGTTATCGGAATTCCTTGTGTAGCGGTGAAATGCGCAGATATAAGGAAGAACACCAGTGGCGAAGGCGGAGAACTGGACGGCAACTGACGGTGAGGC…	>denovo126150	Bacteria;Firmicutes;Clostridia;Clostridiales;Ruminococcaceae;Oscillibacter	0.308642		0.0823998	0.00556158	0.0603531		0.00923162	0.308642												0.00821862	0.00669994												0.0032111												0.00396244
CCTACGGGAGGCAGCAGTGGGGAATATTGCACAATGGGGGAAACCCTGATGCAGCAACGCCGCGTGAAGGATGAAGGTTTTCGGATTGTAAACTTCTTTTATTCGGGACGAAGAAAGTGACGGTACCGAATGAATAAGCCACGGCTAACTACGTGCCAGCAGCCGCGGTAATACGTAGGTGGCGAGCGTTATCCGGATTTACTGGGTGTAAAGGGCGAGTAGGCGGGATTGCAAGTCAGATGTGAAAACTATGGGCTCAACCCATAGACTGCATTTGAAACTGTAGTTCTTGAGTGATGGAGAGGCAGGCGGAATTCCCGGTGTAGCGGTGGAATGCGTAGATATCGGGAGGAACACCAGTGGCGAAGGCGGCCTGCTGGACATTAACTGACGCTGAGG…	>denovo35253	Bacteria;Firmicutes;Clostridia;Clostridiales;Ruminococcaceae;Clostridium IV	0.30768		0.1648	0.13904	0.0804708		0.0123088	0.0308642	0.0181538			0.00142258	0.00727188						0.00573987	0.00821862	0.0167499				0.00445831				0.00511221				0.0032111		0.00564436	0.00229484	0.00591891		0.00675231		0.00242657		0.00348924	0.00241185	0.0277371		0.00469903
CCTACGGGCGGCAGCAGTGAGGAATATTGGTCAATGGCCGAGAGGCTGAACCAGCCAAGTCGCGTGAAGGATGAAGGATCTATGGTTTGTAAACTTCTTTTATAGGGGAATAAAGTGTGGGACGTGTTCCATTTTGTATGTACCCTATGAATAAGCATCGGCTAACTCCGTGCCAGCAGCCGCGGTAATACGGAGGATGCGAGCGTTATCCGGATTTATTGGGTTTAAAGGGAGCGCAGACGGGAGGGTAAGTCAGCTGTGAAAGTTTGCGGCTCAACCGTAAAATTGCAGTTGAAACTGTCTTTCTTGAGTGCGGCAGAGGCAGGCGGAATTCGTGGTGTAGCGGTGAAATGCTTAGATATCACGAAGAACTCCGATTGCGAAGGCAGCCTGCCGGGC…	>denovo27345	Bacteria;Bacteroidetes;Bacteroidia;Bacteroidales;Porphyromonadaceae;Parabacteroides	0.304978
TCTACGGGCGGCAGCAGTGGGGAATATTGCACAATGGGGGAAACCCTGATGCAGCGACGCCGCGTGAGTGAAGAAGTATTTCGGTATGTAAAGCTCTATCAGCAGGGAAGAAGATGACGGTACCTGAGTAAGAAGCCCCGGCTAACTACGTGCCAGCAGCCGCCGTAATACGTAGGGGGCCAGCGTTATCCGGATTTACTGGGTGTAAAGGGAGCGTAGACGGAGCAGCAAGTCTGGAGTGAAAACCCGGGGCTCAACCCCGGGACTGCTTTGGAAACTGTTGTTCTAGAGTGCTGGAGAGGTAAGTGGAATTCCTTGTGTAGCGGTGAAATGCGTAGATATTAGGAGGAACACCAGTGGCGAAGGCGGCTTACTGGACAGTAACTGACGTTGAGGCTC…	>denovo55983	Bacteria;Firmicutes;Clostridia;Clostridiales;Lachnospiraceae;Ruminococcus2	0.302741		0.0178162	0.00834237	0.0251471			0.00771605			0.0125193	0.118074	0.0218156		0.01443	0.0109691	0.0182869		0.00573987	0.00821862	0.0100499		0.0607764	0.106587	0.0490415		0.026255	0.0511589	0.127805		0.00566171	0.034208	0.00963329		0.0079021	0.0298329	0.00394594		0.0354496	0.0356334	0.00121328		0.00523387	0.00241185			0.173864
CCTACGGGGGGCAGCAGTGAGGAATATTGGTCAATGGTCGGCAGACTGAACCAGCCAAGTCGCGTGAAGGAAGACGGCCCTAAGGGTTGTAAACTTCTTTTGTCGGAGAGTAAAGGTCTTCACGAGTGGAGATTTGCAAGTATCCGAAGAAAAAGCATCGGCTAACTCCGTGCCAGCAGCCGCGGTAATACGGAGGATGCGAGCGTTATCCGGATTTATTGGGTTTAAAGGGTGCGTAGGCGGTTTGATAAGTTAGAGGTGAAATCCCGGGGCTTAACTCCGGAACTGCCTCTAATACTGTTAGACTAGAGAGTAGTTGCGGTAGGCGGAATGTATGGTGTAGCGGTGAAATGCTTAGAGATCATACAGAACACCGATTGCGAAGGCAGCTTACCAAAC…	>denovo65981	Bacteria;Bacteroidetes;Bacteroidia;Bacteroidales;Rikenellaceae;Alistipes	0.300894										0.00625965		0.00436313																						0.00564436	0.00688452	0.00197297		0.232955	0.28926	0.300894
CCTACGGGGGGCAGCAGTGGGGGATATTGCACAATGGGGGAAACCCTGATGCAGCAACGCCGCGTGAAGGAAGAAGGTCTTCGGATTGTAAACTTCTGTCCTCAGGGAAGATAATGACGGTACCTGAGGAGGAAGCTCCGGCTAACTACGTGCCAGCAGCCGCGGTAATACGTATGGTGCAAGCGTTATCCGGATTTACTGGGTGTAAAGGGAGCGTAGACGGATAGGCAAGTCTGGAGTGAAAGCCCGGGGCTCAACCCCGGGACTGCTTTGGAAACTGTTTATCTAGAGTGCTGGAGAGGTAAGTGGAATTCCTAGTGTAGCGGTGAAATGCGTAGATATTAGGAGGAACACCAGTGGCGAAGGCGGCTTACTGGACAGTAACTGACGTTGAGGCTC…	>denovo48139	Bacteria;Firmicutes;Clostridia;Clostridiales;Lachnospiraceae	0.298916		0.00445405				0.00615441	0.0231481	0.0181538				0.0174525		0.01443	0.0411342				0.00410931	0.00334997			0.0121814	0.0178333		0.073514	0.11795	0.113747		0.00849257	0.0140856	0.0417443		0.00112887	0.00688452	0.00197297		0.00168808	0.00209608			0.0104677				0.00469903
CCTACGGGGGGCAGCAGTGGGGAATATTGCACAATGGGGGAAACCCTGATGCAGCGACGCCGCGTGAGTGAAGAAGTATTTCGGTATGTAAAGCTCTATCAGCAGGGAAGAAAATGACGGTACCTGACTAAGAAGCCCCGGCTAACTACGTGCCAGCAGCCGCGGTAATACGTAGGGGGCAAGCGTTATCCGGATTTACTGGGTGTAAAGGGCGTGTAGGCGGGATTGCAAGTCAGATGTGAAAACCACGGGCTCAACCTGTGGCCTGCATTTGAAACTGCAGTTCTTGAGTACTGGAGAGGCAGACGGAATTCCTAGTGTAGCGGTGAAATGCGTAGATATTAGGAGGAACACCAGTGGCGAAGGCGGCTTACTGGACGGTAACTGACGTTGAGGCTC…	>denovo16713	Bacteria;Firmicutes;Clostridia;Clostridiales;Lachnospiraceae	0.297507		0.0267243	0.052835	0.0251471		0.0830846	0.146605	0.0272306		0.0083462	0.0113806	0.00872626		0.18759	0.126145	0.149952		0.0258294	0.0821862	0.0502496		0.0531794	0.149222	0.130777		0.15753	0.0994756	0.135474		0.0311394	0.0985995	0.0417443		0.018062	0.0160639	0.00591891		0.0337615	0.00838434	0.00485313		0.0488494	0.0410014	0.0277371		0.0751844
CCTACGGGTGGCTGCAGTGGGGAATATTGCACAATGGGGGAAACCCTGATGCAGCGACGCCGCGTGAGCGATGAAGTATTTCGGTATGTAAAGCTCTATCAGCAGGGAAGAAACTGACGGTACCTGACTAAGAAGCACCGGCTAAATACGTGCCAGCAGCCGCGGTAATACGTATGGTGCAAGCGTTATCCGGATTTACTGGGTGTAAAGGGAGCGTAGACGGCGCGGCACGTCTGAAGTGAAAGCCCGGGGCTTAACCCCGGGACTGCTTTGGAAACTGTCATGCTAGAGTGCTGGAGAGGTAAGTGGAATTCCTAGTGTAGCGGTGAAATGCGTAGATATTAGGAGGAACACCAGTGGCGAAGGCGGCTTACTGGACAGTAACTGACGTTGAGGCAC…	>denovo107551	Bacteria;Firmicutes;Clostridia;Clostridiales;Lachnospiraceae;Ruminococcus2	0.297382		0.0534485	0.0973277	0.0100588		0.00307721	0.0231481	0.00907688							0.00274228	0.00365738		0.00286993	0.0123279				0.00609069	0.00891663						0.00566171	0.00402447	0.0032111		0.00112887								0.00523387		0.00396244		0.00939805
CCTACGGGGGGCTGCAGTGGGGAATATTGCACAATGGGGGAAACCCTGATGCAGCGACGCCGCGTGAGCGAAGAAGTATTTCGGTATGTAAAGCTCTATCAGCAGGGAAGAAACTGACGGTACCTGACTAAGAAGCCCCGGCTAACTACGTGCCAGCAGCCGCGGTAATACGTAGGGGGCAAGCGTTATCCGGATTTACTGGGTGTAAAGGGAGAGTAGACGGTAATGCAAGTAGGGAGTGAAAACCCGGGGCTCAACCCCGGGACTGCTTTGGAAACTGTATAACTGGAGTGCCGGAGAGGTAAGCGGAATTCCTAGTGTAGCGGTGAAATGCGTAGATATTAGGAGGAACACCAGTGGCGAAGGCGGCTGACTGGACGGTAACTGACGTTGAGGCTC…	>denovo31493	Bacteria;Firmicutes;Clostridia;Clostridiales;Lachnospiraceae;Ruminococcus2	0.295846		0.00668107	0.00556158			0.0215404	0.0154321	0.0181538		0.00208655	0.00853546	0.0058175						0.00573987	0.0123279					0.00297221										0.00338662	0.00917936	0.00394594		0.00337615	0.00628825	0.00363985		0.00348924	0.00241185			0.00939805
CCTACGGGCGGCAGCAGTGGGGAATATTGGGCAATGGGGGAAACCCTGACCCAGCAACGCCGCGTGAAGGAAGAAGGCCTTCGGGTTGTAAACTTCTTTTACCAGGGACGAAGGACGTGACGGTACCTGGAGAAAAAGCCACGGCTAACTACGTGCCAGCAGCCGCGGTAATACGTAGGGGGCAAGCGTTATCCGGATTTACTGGGTGTAAAGGGAGCGTAGACGGTGAAGCAAGTCTGGAGTGAAAACCCGGGGCTTAACCCCGGGATTGCTTTGGAAACTGTTTAACTGGAGTGCAGGAGAGGTAAGCGGAATTCCTAGTGTAGCGGTGAAATGCGTAGATATTAGGAGGAACACCAGTGGCGAAGGCGGCTTACTGGACTGTAACTGACGTTGAGG…	>denovo88610	Bacteria;Firmicutes;Clostridia;Clostridiales;Lachnospiraceae	0.294649			0.00556158			0.00923162	0.0154321	0.0544613							0.00274228	0.00365738			0.00410931	0.00334997				0.00445831							0.00201223	0.0256888										0.00697849	0.00241185
CCTACGGGTGGCTGCAGTGGGGGATATTGCACAATGGGGGAAACCCTGATGCAGCAACGCCGCGTGGAGGAAGAAGGTCTTCGGATTGTAAACTTCTGTCCTCAGGGAAGATAATGACGGTACCTGAGGAGGAAGCTCCGGCTAACTACGTGCCAGCAGCCGCGGTAATACGTAGGCGGCAAGCGTTGTCCGGAATTATTGGGCGTAAAGGGAGCGCAGGCGGGAAGTTAAGCGGACTTTAAAAGTGCGGGGCTCAACCCCGTGAGGGGGTCCGAACTGACTTTCTTGAGTGCAGGAGAGGGAAGCGGAATTCCTAGTGTAGCGGTGAAATGCGTAGATATTAGGAAGAACACCAGTGGCGAAGGCGGCTTTCTGGACTGTAACTGACGCTGAGGCTCG…	>denovo6030	Bacteria;Firmicutes;Negativicutes;Selenomonadales;Veillonellaceae;Megamonas	0.293956															0.00548456
CCTACGGGTGGCTGTAGTGGGGAATATTGGGCAATGGGCGCAAGCCTGACCCAGCAACGCCGCGTGAAGGAAGAAGGCTTTCGGGTTGTAAACTTCTTTTGTCAGGGAACAGTAGAAGAGGGTACCTGACGAATAAGCCACGGCTAACTACGTGCCAGCAGCTGCGGTAATACGTAGGTGGCAAGCGTTGTCCGGATTTACTGGGTGTAAAGGGCGTGCAGCCGGGCTGGTAAGTCAGATGTGAAATCCGTGGGCTTAACCCACGAACTGCATTTGAAACTGCTGGTCTTGATTACCGGAGAGGTTATCGGAATTCCTTGTGTAGCTGTGAAATGCGTAGATATAAGGAAGAACACCATTGGCGAAGGCGGATAACTGGCCGGCAACTGACGGTGAGGC…	>denovo18700	Bacteria;Firmicutes;Clostridia;Clostridiales;Ruminococcaceae;Oscillibacter	0.29321		0.0378594	0.00556158	0.0201177		0.00307721	0.29321	0.00907688																											0.00458968							0.00348924	0.00241185
CCTACGGGTGGCAGCAGTGAGGAATATTGGTCAATGGCCGTAAGGCTGAACCAGCCAAGTAGCGTGAAGGACGACGGCCCTACGGGTTGTAAACTTCTTTTATAAGGGAATAAAGTTGCGTACGCGTACGCATTTGCATGTACCTTATGAATAAGCATCGGCTAACTCCGTGCCAGCAGCCGCGGTAATACGGAGGATGCGAGCGTTATCCGGATTTATTGGGTTTAAAGGGAGCGCAGACGGGAGGGTAAGTCAGCTGTGAAAGTTTGCGGCTCAACCGTAAAATTGCAGTTGAAACTGTCTTTCTTGAGTGCGGCAGAGGCAGGCGGAATTCGTGGTGTAGCGGTGAAATGCTTAGATATCACGCAGAACTCCAATTGCGAAGGCAGCTTACTAAAC…	>denovo81665	Bacteria;Bacteroidetes;Bacteroidia;Bacteroidales	0.29318																																		0.0169331	0.0275381	0.0118378
CCTACGGGCGGCAGCAGTAGGGAATATTGCACAATGGGGGAAACCCTGATGCAGCGACGCCGCGTGAGCGAAGAAGTATCTCGGTATGTAAAGCTCTATCAGCAGGGAAGAAGATGACGGTACCTGACTAAGAAGCACCGGCTAAATACGTGCCAGCAGCCGCGGTAATACGTATGGTGCAAGCGTTATCCGGATTTACTGGGTGTAAAGGGAGCGTAGACGGAAGAGCAAGTCTGGAGTGAAAGCCCGGGGCTCAACCCCGGGACTGCTTTGGAAACTGTGTATCTAGATGGCCGGAGAGGCAAGCGGAATTCCTAGTGTGGCGGGGAAATGCGTAGATATTAGGAGGACCACCAGTGGCGAAGGCGGCTTGCTGGACGGTAACTGACGTTGAGGCTC…	>denovo113943	Bacteria;Firmicutes;Clostridia;Clostridiales;Lachnospiraceae	0.293096		0.00222702	0.00278079
CCTACGGGCGGCTGCAGTGGGGAATATTGGGCAATGGGCGCAAGCCTGACCCAGCAACGCCGCGTGAAGGAAGAAGGCCCTCGGGTTGTAAACTTCTTTTGTCAGGGACGAAGCAAGTGACGGTACCTGACGAATAAGCCACGGCTAACTACGTGCCAGCAGCCGCGGTAATACGTAGGTGGCAAGCGTTATCCGGATTTACTGGGTGTAAAGGGCGTGTAGGCGGGATTGCAAGTCAGATGTGAAAACCACGGGCTCAACCTGTGGCCTGCATTTGAAACTGCAGTTCTTGAGTACTGGAGAGGCAGACGGAATTCCTAGTGTAGCGGTGAAATGCGTAGATATTAGGAGGAACATCGGTGGCGAAGGCGACTTACTGGACTGTAACTGACACTGAGG…	>denovo21793	Bacteria;Firmicutes;Clostridia;Clostridiales;Ruminococcaceae	0.292652		0.0155892	0.0305887	0.0150883		0.101548	0.0771605	0.0635382			0.00284515	0.0058175		0.12025	0.0383919	0.120693		0.0114797	0.053421	0.0200998		0.0303882	0.0852697	0.0639025		0.178534	0.0952124	0.100966		0.127389	0.0120734	0.0353221		0.00677323	0.00229484	0.00197297		0.0202569		0.00606642		0.00872311	0.0482369	0.0158497		0.0516893
CCTACGGGGGGCTGCAGTGAGGAATATTGGTCAATGGGCGAGAGCCTGAACCAGCCAAGTAGCGTGAAGGATGAAGGCTCTATGGGTCGTAAACTTCTTTTATATGGGAATAAAGTTTTCCACGTGTGGAATTTTGTATGTACCATATGAATAAGGATCGGCTAACTCCGTGCCAGCAGCCGCGGTAATACGGAGGATCCGAGCGTTATCCGGATTTATTGGGTTTAAAGGGTGCGTAGGTGGTAATTTAAGTCAGCGGTGAAAGTTTGTGGCTCAACCATAAAATTGCCGTTGAAACTGGGTTACTTGAGTGTGTTTGAGGTAGGCGGAATGCGTGGTGTAGCGGTGAAATGCATAGATATCACGCAGAACTCCAATTGCGAAGGCAGCTTACTAAAC…	>denovo42039	Bacteria;Bacteroidetes;Bacteroidia;Bacteroidales;Porphyromonadaceae;Parabacteroides	0.28998
CCTACGGGTGGCAGCAGTGGGGAATATTGCACAATGGAGGAAACTCTGATGCAGCGACGCCGCGTGAGGGAAGAAGGTCTTCGGATTGTAAACCTCTGTTGTCAGGGACGATGATGACGGTACCTGACGAGGAAGCCACGGCTAACTACGTGCCAGCAGCCGCGGTAAAACGTAGGTGGCAAGCGTTGTCCGGAATTACTGGGTGTAAAGGGAGCGCAGGCGGGAGAGCAAGTTGGGAGTGAAATCTGTGGGCTCAACCCACAAATTGCTTTCAAAACTGTTTTTCTTGAGTGGTGTAGAGGTAGGCGGAATTCCCGGTGTAGCGGTGGAATGCGTAGATATCGGGAGGAACACCAGTGGCGAAGGCGGCCTACTGGGCACTAACTGACGCTGAGGCTC…	>denovo77620	Bacteria;Firmicutes;Clostridia;Clostridiales;Ruminococcaceae;Faecalibacterium	0.287586		0.00445405	0.0583966	0.171		0.00307721	0.00771605								0.00274228									0.00445831							0.00201223											0.00523387
CCTACGGGAGGCAGCAGTGGGGAATATTGGGCAATGGGCGCAAGCCTGACCCAGCAACGCCGCGTGAAGGAAGAAGGCCCTCGGGTTGTAAACTTCTTTTGTCAGGGACGAAGCAAGTGACGGTACCTGACGAATAAGCCACGGCTAACTACGTGCCAGCAGCCGCGGTAATACGTAGGTGGCAAGCGTTATCCGGATTTACTGGGTGTAAAGGGAGCGTAGACGGCAGAGCAAGTCTGATGTGAAAGGCAGGGGCTCAACCCCTGGACTGCATTGGAAACTGTTCGGCTTGAGTGCCGGAGAGGTAAGCGGAATTCCTAGTGTAGCGGTGAAATGCGTAGATATTAGGAGGAACACCAGTGGCGAAGGCGGCTTACTGGACGGCAACTGACGTTGAGG…	>denovo82314	Bacteria;Firmicutes;Clostridia;Clostridiales;Lachnospiraceae	0.287481		0.00222702		0.0150883		0.0369265	0.0385802	0.00907688						0.01443		0.0109721			0.00821862	0.00669994				0.0104027		0.126024	0.0767383	0.0894637		0.0283086	0.0201223	0.0160555										0.00348924	0.00241185	0.00792487		0.00469903
CCTACGGGTGGCAGCAGTGGGGAATATTGCACAATGGGGGAAACCCTGATGCAGCGACGCCGCGTGAGGGAAGAAGGTTTTCGGATTGTAAACCTCTGTCTTTGGTGACGATAATGACGGTAACCAAAGAGGAAGCTACGGCTAACTACGTGCCAGCAGCCGCGGTAATACGTAGGGGGCAAGCGTTATCCGGATTTACTGGGTGTAAAGGGAGCGTAGACGGCATGGCAAGTCTGGAGTGAAAACCCAGGGCTCAACCTTGGGATTGCTTTGGAAACTGTCAAGCTGGAGTGCCGGAGAGGTAAGCGGAATTCCTAGTGTAGCGGTGAAATGCGTAGATATTAGGAGGAACACCAGTGGCGAAGGCGGCTTACTGGACGGTAACTGACGTTGAGGCTC…	>denovo100017	Bacteria;Firmicutes;Clostridia;Clostridiales;Lachnospiraceae	0.286281				0.00502942												0.00365738		0.00573987								0.005251	0.0071054	0.00127805		0.00566171	0.00402447	0.0224777														0.00469903
CCTACGTGAGGCAGCAGTGGGGAATATTGCACAATGGGGGAAACCCTGATGCAGCGACGCCGCGTGAAGGAAGAAGTATCTCGGTATGTAAACTTCTATCAGCAGGGAAGAAAATGACGGTACCTGACTAAGAAGCCCCGGCTAACTACGTGCCAGCAGCCGCGGTAATACGTAGGGGGCAAGCGTTATCCGGATTTACTGGGTGTAAAGGGAGCGTAGACGGCGCGGCAAGTCTGAAGTGAAAGCCCGGGGCTTAACCCCGGGACTGCTTTGGAAACTGCCATGCTGGAGTGCTGGAGAGGTAAGTGGAATTCCTAGTGTAGCGGTGAAATGCGTAGATATTAGGAGGAACACCAGTGGCGAAGGCGGCTTACTGGACAGTAACTGACGCTGAGGCAC…	>denovo56026	Bacteria;Firmicutes;Clostridia;Clostridiales;Lachnospiraceae;Coprococcus	0.285494		0.00445405	0.00556158			0.0615441	0.285494	0.0363075							0.0246805	0.0109721		0.00286993	0.00410931	0.00334997				0.00297221						0.0169851	0.00402447	0.0160555										0.00872311	0.00241185
CCTACGGGTGGCAGCAGTGGGGAATATTGCACAATGGGGGAAACCCTGATGCAGCGACGCCGCGTGAGTGAAGAAGTATTTCGGTATGTAAAGCTCTATCAGCAGGGAAGAAAATGACGGTACCTGACTAAGAAGCCCCGGCTAACTACGTGCCAGCAGCCGCGGTGATACGTAGGTGGCAAGCGTTGTCCGGAATTACTGGGTGTAAAGGGAGCGCAGGCGGGAGAGCAAGTCAGCTGTGAAAACCACGGGCTTAACCTGTGGACTGCAGTTGAAACTGTTCTTCTTGAGTGAAGTAGAGGTAAGCGGAATTCCGAGTGTAGCGGTGAAATGCGTAGAGATTCGGAGGAACACCAGTGGCGAAGGCGGCTTACTGGGCTTTAACTGACGCTGAGGCTC…	>denovo70660	Bacteria;Firmicutes;Clostridia;Clostridiales	0.285268		0.0512215	0.052835	0.0553236		0.00307721				0.0041731	0.0113806	0.00872626		0.01443	0.0109691	0.00731475			0.0164372	0.0167499		0.00759705	0.00609069	0.0133749		0.10502	0.146371	0.173815		0.0113234	0.0140856	0.0481665		0.00903098	0.0252433	0.0157838		0.0151927	0.00209608	0.00121328		0.00174462				0.0187961
CCTACGGGGGGCTGCAGTGGGGAATATTGCACAATGGGGGAGACCCTGATGCAGCGACGCCGCGTGAGCGAAGAAGTATCTCGGTATGTAAAGCTCTATCAGCAGGGAAGAAGATGACGGTACCTGACTAAGAAGCACCGGCTAAATACGTGCCAGCAGCCGCGGTAATACGTATGGTGCAAGCGTTATCCGGATTTACTTGGTGTAAAGGGAGCGTAGACGGAGAAGCAAGTCTGGAGTGAAAGCCCGGTGCTCAACCCCGGGACTGCTTTGGAAACTGTTTGTCTAGAGTGAAGGAGAGGTAGGCGGAATTCCTAGTGTAGCGGTGAAATGCGTAGATATTAGGAGGAACACCAGTGGCGAAGGCGGCTTACTGGACGGTAACTGACGTTGAGGCTC…	>denovo69773	Bacteria;Firmicutes;Clostridia;Clostridiales;Lachnospiraceae	0.283822										0.0709427				0.00962001	0.0164537	0.0402311		0.00286993									0.00284216	0.00127805			0.00201223			0.00112887		0.00986485		0.00337615	0.0146726	0.0351852		0.0418709	0.00482369
TCTACGGGAGGCAGCAGTGGGGAATATTGCACAATGGGGGAAACCCTGATGCAGCGACGCCGCGTGAAGGAAGAAGCATCTCGGTATGTAAACTTCTATCAGCAGGGAAGAAAGTGACGGTACCTGACTAAGAAGCCCCGGCTAACTACGTGCCAGCAGCCGCGGTAATACGTAGGGGGCAAGCGTTATCCGGATTTACTGGGTGTAAAGGGAGCGTAGACGGTGAAGCAAGTCTGGAGTGAAAACCCGGGGCTTAACCCCGGGATTGCTTTGGAAACTGTTTAACTGGAGTGCAGGAGAGGTAGGCGGAATTCCTAGTGTAGCGGTGAAATGCGTAGATATTGGGAGGAACACCAGTGGCGAAGGCGGCTTACTGGACTGTAACTGACGTTGAGGCTC…	>denovo100049	Bacteria;Firmicutes;Clostridia;Clostridiales;Lachnospiraceae;Clostridium XlVa	0.281254		0.0267243	0.0806429	0.110647		0.0400037	0.0540123	0.0363075			0.00142258			0.00962001	0.00274228			0.281254	0.11917	0.0803993		0.0835676	0.0121814	0.0698469		0.042008	0.0440535	0.0754051		0.00849257	0.0905505	0.0128444		0.00112887				0.00168808	0.00419217			0.0837419	0.0361777	0.0277371		0.0234951
CCTACGGGTAGCTGCAGTGGGGAATATTGCACAATGAGGGAAACCCTGATGCAGCGACGCCGCGTGAGTGAAGAAGTATTTCGGTATGTAAAGCTCTATCAGCAGGGAAGAAAATGACGGTACCTGACTAAGAAGCCCCGGCTAACTACGTGCCAGCAGCCGCGGTAATACGTAGGGGGCAAGCGGTATCCGGATTTACTGGGTGTAAAGGGAGCGTAGACGGTAATGCAAGTCTGGAGTGAAAACACGGGGCCCAACCCCGGGACTGCTTTGGAAACTGTATAACTGGAGTGCCGGAGAGGTAAGCGGAATTCCTAGTGTAGCGGTGAAATGCGTAGAGATTAGGAGGAACACCAGTGGCGAAGGCGGCTTACTGGACGGTAACTGACGTTGAGGCTC…	>denovo34926	Bacteria;Firmicutes;Clostridia;Clostridiales;Lachnospiraceae;Clostridium XlVa	0.279635		0.00222702	0.0194655	0.0100588				0.00907688		0.00625965		0.00145438						0.00573987	0.00821862					0.00297221											0.00688452	0.00197297			0.00419217			0.00174462	0.00482369	0.00792487		0.00469903
CCTACGGGGGGCTGCAGTAGGGAATATTGCACAATGGGGGAAACCCTGATGCAGCGACGCCGCGTGAGCGAAGAAGTATCTCGGTATGTAAAGCTCTATCAGCAGGGAAGAAGATGACGGTACCTGACTACGAAGCACCGGCTAAATACGTGCCAGCAGCCGCGGTAATACGTATGGTGCAAGCGTTATCCGGATTTACTGGGTGTAAAGGGAGCGTAGACGGAAGAGCAAGTCTGGAGTGAAAGCCCTGGGCTCAACCCCGGGACTTCTTTGGAAACTGTTTATCTAGAGTGCCGGAGAGGCAAGCGGAATTCCTAGTGTAGCGGGTAAATGCGTAGATATTAGGAGGAACACCGGTGGCGAAGGCGGCTTACTGGACGGTAACTGACGTTGAGGCTC…	>denovo110203	Bacteria;Firmicutes;Clostridia;Clostridiales;Lachnospiraceae;Ruminococcus2	0.279569			0.00278079			0.00615441													0.00410931	0.0100499																						0.00174462
CCTACGGGTGGCAGCAGTGGGGAATATTGCGCAATGGGGGCAACCCTGACGCAGCAACGCCGCGTGATTGAAGAAGGCCTTCGGGTTGTAAAGATCTTTAATCAGGGACGAAACATGACGGTACCTGAAGAATAAGCTCCGGCTAACTACGTGCCAGCAGCCGCGGTAATACGTAGGTGGCAAGCGTTATCCGGATTTACTGGGTGTAAAGGGCGTGTAGGCGGGATTGCAAGTCAGATGTGAAAACCACGGGCTCAACCTGTGGCCTGCATTTGAAACTGCAGTTCTTGAGTACTGGAGAGGCAGACGGAATTCCTAGTGTAGCGGTGAAATGCGTAGATATTAGGAGGAACACCAGTGGCGAAGGCGGTCTGCTGGACAGCAACTGACGCTGAGGCG…	>denovo87779	Bacteria;Firmicutes;Clostridia;Clostridiales;Ruminococcaceae	0.278749		0.0200432	0.0333695	0.0201177		0.0184632	0.0308642	0.00907688			0.00142258			0.0769601	0.049361	0.00365738			0.00410931			0.0607764	0.0365441	0.0356665		0.063012	0.0412113	0.0357855		0.104742	0.0120734	0.0577998		0.00112887								0.027914	0.00723554	0.00396244		0.0422912
CCTACGGGTGGCAGCAGTGAGGAATATTGGTCAATGGACGAGAGTCTGAACCAGCCAAGTAGCGTGAAGGATGAAGGTCCTACGGATTGTAAACTTCTTTTATAAGGGAATAAAACCTTCCACGTGTGGGAGCTTGTATGTACCTTATGAATAAGCATCGGCTAACTCCGTGCCAGCAGCCGCGGTAATACGGAGGATGCGAGCGTTATCCGGATTTATTGGGTTTAAAGGGAGCGCAGACGGGTCGTTAAGTCAGCTGTGAAAGTTTGGGGCTCAACCTTAAAATTGCAGTTGATACTGGCGTCCTTGAGTGCGGTTGAGGTGTGCGGAATTCGTGGTGTAGCGGTGAAATGCTTAGATATCACGAAGAACTCCGATTGCGAAGGCAGCACACTAAGC…	>denovo101589	Bacteria;Bacteroidetes;Bacteroidia;Bacteroidales;Bacteroidaceae;Bacteroides	0.27808															0.175506	0.149952
CCTACGGGTGGCAGCAGTGGGGAATATTGCACAATGGGGGAAACCCTGATGCAGCGACGCCGCGTGAGCGAAGAAGTATCTCGGTATGTAAAGCTCTATCAGCAGGGAAGAAGATGACGGTACCTGACTAAGAAGCACCGGCTAAATACGTGCCAGCCGCCGCGGTAATACGTATGGTTCAAGCGTTATCCGGATTTACTGGGTGTAAAGGGAGCGTAGACGGAAGAGCAAGTCTGGAGTGAAAGCCCGGGGATCAACCCCGGGACTGCTTTGGAAGCTGTTTATCTAGAGTGCCGGAGAGGTAAGCGGAATTCCTAGTGTAGCGGTGAAATGCGTAGATATTAGGAGGAACACCAGTGGCGAAGGCGGCTTACTGGACTGTAACTGACGTTGAGGCTC…	>denovo110879	Bacteria;Firmicutes;Clostridia;Clostridiales;Lachnospiraceae	0.277314		0.0133621	0.00278079	0.00502942		0.00307721		0.00907688						0.00481				0.00286993	0.00410931				0.00304535	0.00297221																				0.00396244
CCTACGGGCGGCAGCAGTGGGGAATATTGCACAATGGGGGAAACCCTGATGCAGCGACGCCGCGTGAGTGAAGAAGTATTTCGGTATGTAAAGCTCTATCAGCAGGGAAGAAAATGACGGTACCTGACTAAGAAGCCCCGGCTAACTACGTGCCAGCAGCCGCGGTAATACGTAGGTGGCAAGCGTTGTCCGGAATTACTGGGTGTAAAGGGAGCGTAGGCGGGGAGACAAGTCGGGTGTTAAATCTATCGGCTCAACTGGTAGCAGCACTCGAAACTGTAACTCTTGAGTGAAGTAGAGGTAAGCGGAATTCCTAGTGTAGCGGTGAAATGCGTAAATATTAGGAGGAACACCAGTGGCGAAGGCGGCTTACTGGGCTTTAACTGACGCTGAGGCTCG…	>denovo124977	Bacteria;Firmicutes;Clostridia;Clostridiales	0.276949		0.0378594	0.0472734			0.276949	0.185185	0.108923										0.0172196	0.0410931	0.0100499				0.0104027							0.00402447											0.0209355	0.031354	0.0356619		0.0187961
CCTACGGGGGGCTGCAGTGGGGAATATTGCACAATGGGGGAAACCCTGATGCAGCAACGCCGCGTGAGTGAAGAAGTATTTCGGTATGTAAAGCTCTATCAGCAGGGAAGATAATGACGGTACCTGACTAAGAAGCTCCGGCTAAATACGTGCCAGCAGCCGCGGTAATACGTATGGAGCAAGCGTTATCCGGATTTACTGGGTGTAAAGGGTGCGTAGGCGGCAGAGCAAGTCAGATGTGAAAGACCGGGGCTCAACCCCGGGGCTGCATTTGAAACTGTTTATCTAGAGTGCTGGAGAGGTAAGTGGAATTCCTAGTGTAGCGGTGAAATGCGTAGATATTAGGAGGAACACCAGTGGCGAAGGCGGCTTACTGGACAGTAACTGACGTTGAGGCTC…	>denovo23111	Bacteria;Firmicutes;Clostridia;Clostridiales;Lachnospiraceae	0.276413		0.00222702								0.0333848					0.0164537	0.0402311							0.00304535
CTTACGGGAGGCAGCAGTGGGGAATATTGCACAATGGGGGAAACCCTGATGCAGCGACGCCGCGTGAGTGAAGAAGTATTTCGGTATGTAAAGCTCTATCAGCAGGGAAAAAATTGACGGTACCTGACTAAGAAGCACCGGCTAAATACGTGCCAGCAGCCGCGGCAATACGTATGGTGCAAGCGTTATCCGGATTTACTGGGTGTAAAGGGAGCGTAGACGGAGCAGCAAGTCTGGAGTGAAAACCCGGGGCTCAACCCCGGGACTGCTTTGGAAACTGTTGTTCTAGAGTGCTGGAGAGAGAAGTGGAATTCCTAGTGTAGCGGTGAAATGCGTAGATATTAGGAGGAACACCAGTGGCGAAGGCGGCTTACTGGACGGTAACTGACGTTGAGGCTC…	>denovo73011	Bacteria;Firmicutes;Clostridia;Clostridiales;Lachnospiraceae;Ruminococcus2	0.276413		0.00222702	0.00278079	0.0201177		0.00615441	0.0154321	0.0181538		0.0146059	0.162174	0.034905		0.00481	0.0274228	0.058518		0.00286993					0.0213174	0.0133749		0.010502	0.035527	0.0345074		0.00566171	0.0060367	0.0032111		0.0191908	0.00688452	0.0177567		0.00844039	0.0188648	0.00363985						0.0798835
CCTCGGGCGGCAGCAGTGGGGAATATTGCACAATGGGGGAAACCCTGATGCAGCGACGCCGCGTGAGCGAAGAAGTATTTCGGTATGTAAAGCTCTATCAGCAGGGAAGAAATTGACGGTACCTGACTAAGAAGCCCCGGCTAACTACGTGCCAGCAGCCGCGGTAATACGTAGGGGGCAAGCGTTATCCGGATTTACTGGGTGTAAAGGGAGCGTAGACGGGCCAGCAAGTCTGATGTGAAAACCCGGGGCCCAACCCCGGGAGTGCATTGGAAACTGCGGGCCTGGAGTGCCGGAGAGGTAAGCGGAATTCCTAGTGTAGCGGTGAAATGCGTAGATATTAGGAGGAACACCAGTGGCGAAGGCGGCTTACTGGACGGTAACTGACGTTGAGGCTCG…	>denovo124927	Bacteria;Firmicutes;Clostridia;Clostridiales;Lachnospiraceae;Ruminococcus2	0.275928																																								0.00121328
CCTACGGGAGGCTGCAGTGGGGAATATTGCACAATGGGGGAAACCCTGATGCAGCGACGCCGCGTGAGTGAAGAAGTATTTCGGTATGTAAAGCTCTATCAGCAGGGAAGAAAATGACGGTACCTGACTAAGAAGCCCCGGCTAACTACGTGCCAGCAGCCGCGGTAATACGTAGGGGGCAAGCGTTATCCGGATTTACTGGGTGTAAAGGGAGCGTAGACGGAATGGCAAGTCTGATGTGAAAGGCGGGGGCTCAACCCCTGGACTGCATTGGAAACTGCCAGTCTTGAGTACCGGAGGGGTAAGCGGAATTCCTAGTGTAGCGGTGAAATGCGTAGATATTAGGAGGAACACCAGTGGCGAAGGCGGCTTACTGGACGGTAACTGACGTTGAGGCTC…	>denovo82867	Bacteria;Firmicutes;Clostridia;Clostridiales;Lachnospiraceae;Blautia	0.275298		0.131394	0.275298	0.160942		0.0984706	0.123457	0.0907688			0.00426773	0.00290875			0.00274228	0.00365738		0.0545288	0.217793	0.154099			0.00913604	0.0267499				0.00127805		0.0141543	0.0100612	0.0032111		0.00225774					0.00419217			0.258204	0.0385896	0.0554741		0.0328932
CCTACGGGTGGCTGCAGTGGGGGATATTGCACAATGGGGGAAACCCTGATGCAGCGACGCCGCGTGAGTGAAGAAGTATTTCGGTATGTAAAGCTCTATCAGCAGGGAAGAAAATGACGGTACCTGACTAAGAAGCCCCGGCCAACTACGTGCCAGCAGCCGCGGTAATACGTAGGGGGCAAGCGTTATCCGGAATTACTGGGTGTAAAGGGTGCGTAGGTGGCAGGGCAAGTCAGAAGAGAAAACCCGGGGCTCAACTCCGGGACTGCTTTTGAAACTGTCCAGCTAGAGGGCAGGAGAGGTAAGCGGAATTCCTAGTGTAGCGGTGAAATGCGTAGATATTAGGAGGAACATCAGTGACGAAGGCGGCTTACTGGACTGAAACTGACACTGAGGCAC…	>denovo62203	Bacteria;Firmicutes;Clostridia;Clostridiales;Lachnospiraceae;Anaerostipes	0.275081				0.00502942						0.00208655					0.00274228	0.00365738		0.0086098												0.00283086	0.0100612	0.00963329				0.00197297						0.0767634	0.00241185	0.00792487
CCTACGGGTGGCTGCAGTGGGGAATATTGCACAATGGGGGAAACTCTGACGCAGTGACGCCGCGTGCAGGAAGAAGGTTTTCGGATTGTAAACTGCTTTAGACAGGGAAGAAAAAAGACAGTACCTGTAGAATAAGCTCCGGCTAACTACGTGCCAGCAGCCGCGGTAATACGTAGGGAGCAAGCGTTATCCGGATTTATTGGGTGTAAAGGGTGCGTAGACGGGGAATCAAGTTAGTTGTGAAATCCCTCGGCTTAACTGAGGAACTGCAACTAAAACTAATTTTCTTGAGTGCTGGAGAGGAAAGTGAAATGCCTAGTGTAGCGGTGAAATGCGTAGATATTAGGAGGAACACAAGTGGCGAAGGCGACTTTCTGGACAGTAACTGACGTTGAGGCA…	>denovo29724	Bacteria;Firmicutes;Clostridia;Clostridiales	0.27423		0.00222702	0.00278079			0.00615441														0.00334997
CTTACGGGGGGCTGCAGTGGGGAATATTGCACAATGGGGGAAACCCTGATGCAGCGACGCCGCGTGAAGGAAGAAGTATCTCGGTATGTAAACTTCTATCAGCAGGGAAGAAAATGACGGTACCTGACTAAGAAGCACCGGCTAAATACGTGCCAGCAGCCGCGGTAATACGTATGGTGCAAGCGTTATCCGGATTTACTGGGTGTAAAGGGAGCGTAGACGGATAAGCACGTCTGGAGTGAAAGCCCGGGGCTCAACCCCGGGGCTGCTTTGGAAACTGTTTGTCTAGAGTGCCGGAGAGGTAAGCGGAATTCCTAGTGTAGCGGTGAAATGCGTAGATATTAGGAGGAACACCAGTGGCGAAGGCGGCTTACTGGACGGTAACTGACGTTGAGGCTC…	>denovo13864	Bacteria;Firmicutes;Clostridia;Clostridiales;Lachnospiraceae	0.273863		0.00890809	0.00556158	0.00502942		0.0184632	0.00771605	0.00907688		0.0166924	0.00853546	0.00872626		0.03367	0.0329074	0.0804623		0.0315693	0.00410931	0.00334997			0.00913604	0.00297221		0.026255	0.0227373	0.0281172		0.0226469	0.00201223	0.0160555		0.0101598	0.00458968	0.0335405		0.00675231	0.0146726	0.00121328		0.0610618	0.00482369	0.00792487		0.00469903
CCTACGGGAGGCAGCAGTGGGGAATATTGCACAATGGGGGAAACCCTGATGCAGCGACGCCGCGTGAAGGAAGAAGTATCTCGGTATGTAAACTTCTATCAGCAGGGAAGAAAATGACGGTACCTGACTAAGAAGCCCCGGCTAACTACGTGCCAGCAGCCGCGGTAATACGTAGGCGGCAAGCGTTGTCCGGAATTATTGGGCGTAAAGGGAGCGCAGGCGGGAAGTTAAGCGGACTTTAAAAGTGCGGGGCTCAACCCCGTGAGGGGGTCCGAACTGACTTTCTTGAGTGCAGGAGAGGGAAGCGGAATTCCTAGTGTAGCGGTGAAATGCGTAGATATTAGGAAGAACACCAGTGGCGAAGGCGGCTTACTGGACAGTAACTGACGTTGAGGCTCG…	>denovo112499	Bacteria;Firmicutes;Clostridia;Clostridiales;Lachnospiraceae	0.273162															0.00274228
CCTACGGGTGGCAGCAGTGAGGAATATTGGTCAATGGCCGAGAGGCTGAACCAGCCAAGTCGCGTGAAGGATGAAGGATCTATGGTTTGTAAACTTCTTTTATAGGGGAATAAAGTGTGGGACGTGTTCCATTTTGTATGTACCCTATGAATAAGCATCGGCTAACTCCGTGCCAGCAGCCGCGGTAATACGGAGGATGCGAGCGTTATCCGGATTTATTGGGTTTAAAGGGAGCGTAGGCGGACGCTTAAGTCAGTTGTGAAAGTTTGCGGCTCAACCGTAAAATTGCAGTTGATACTGGGTGTCTTGAGTACAGTAGAGGCAGGCGGAATTCGTGGTGTAGCGGTGAAATGCTTAGATATCACGAAGAACTCCGATTGCGAAGGCAGCCTGCTGGAC…	>denovo71398	Bacteria;Bacteroidetes;Bacteroidia;Bacteroidales;Bacteroidaceae;Bacteroides	0.272301
CCTACGGGTGGCTGCAGTGGGGAATATTGGGCAATGGGCGCAAGCCTGACCCAGCAACGCCGCGTGAAGGATGAAGGCTTTCGGGTTGTAAACTTCTTTTATCAGGGACGAAACAAATGACGGTACCTGATGAATAGGCCACGGCTAACTACGTGCCAGCAGCCGCGGTAATACGTAGGTGGCAAGCGTTATCCGGATTTACTGGGTGTAAAGGGCGTGTAGGCGGGACTGCAAGTCAGATGTGAAAACTATGGGCTCAACCCGTAGCCTGCATTTGAAACTGTAGTTCTTGAGTGCTGGAGAGGCAATCGGAATTCCGTGTGTAGCGGTGAAATGCATAGATATTAGGAGGAACACCAGTGGCGAAGGCGGCTTACTGGACAGTAACTGACGTTGAGG…	>denovo70403	Bacteria;Firmicutes;Clostridia;Clostridiales;Ruminococcaceae;Pseudoflavonifractor	0.270428		0.0155892	0.0305887	0.0150883		0.255408	0.00771605											0.0286993	0.0410931	0.00334997				0.0014861																		0.00174462	0.00482369
TCTACGGGAGGCAGCAGTGGGGAATATTGCACAATGGGGGAAACCCTGATGCAGCGACGCCGCGTGAGTGAAGAAGTATTTCGGTATGTAAAGCTCTATCAGCAGGGAAGAAAATGACGGTACCTGACTAAGAAGCCCCGGCTAACTACGTGCCAGCAGCCGCGGTAATACGTAGGGGGCAAGCGTTATCCGGATTTACTGGGTGTAAAGGGAGCGTAGACGGATGTGCAAGTCTGGAGTGAAAACCCGGGGCTCAACCCCGGGACTTCTTTGGAAACTGTATATCTTGAGTGCTGGAGAGGTAAGTGGAATTCCTAGTGTAGCGGTGAAATGCGTAGATATTAGGAGGAACACCAGTGGCGAAGGCGGCTTACTGGACAGTAACTGACGTTGAGGCTC…	>denovo32636	Bacteria;Firmicutes;Clostridia;Clostridiales;Lachnospiraceae;Ruminococcus2	0.268996		0.0111351	0.013904	0.0100588		0.015386	0.0540123	0.00907688		0.00625965	0.0398321	0.0189069		0.02405	0.0383919	0.0182869		0.0172196	0.0164372	0.00669994		0.0455823	0.0213174	0.0237777		0.031506	0.0838437	0.0447319		0.0113234	0.0060367	0.032111		0.00225774	0.00458968	0.00394594		0.00506423	0.0125765	0.00363985		0.0104677	0.0192948	0.0158497		0.0234951
CCTACGGGTGGCTGCAGTGGGGGATATTGCACAATGGGGGAAACCCTGATGCAGCGACGCCGCGTGAGCGAAGAAGTATCTCGGTATGTAAAGCTCTATCAGCAGGGAAGAAGATGACGGTAACTGACTAAGAAGCACCGGCTAAATACGTGCCAGCAGCCGCGGTAATACGTATGATGCAAGCGTTATCCGGATTTACTGGGTGTAAAGGGAGCGTAGACGGCAAGGCAAGTCTGAAGTGAAAGCCCGGGGCTTAACCGCGGGACTGCTTTGGAAACTGTCTGGCTGGAGGGCCGGAGAGGTAAGCGGAATTCCTAGTGTAGCGGTGAAATGCGTAGATATTAGGAGGAACACCAGTGGCGAAGGCGGCTTACTGGACGGTAACTGACGTTGAGGCTC…	>denovo86974	Bacteria;Firmicutes;Clostridia;Clostridiales;Lachnospiraceae;Coprococcus	0.265604		0.0244972	0.0111232	0.00502942		0.00615441				0.0292117	0.0569031	0.0101806		0.02405	0.0630725	0.0365738		0.00286993		0.00669994			0.0121814			0.010502	0.0071054	0.0178927		0.00566171		0.0064222		0.00451549	0.00688452	0.0197297		0.0202569	0.0146726	0.0072797		0.0157016		0.00396244
CCTACGGGTGGCTGCAGTGGGGAATATTGGTCAATGGAGGAAACTCTGACCCAGCAACGCCGCGTGAATGATGAAGGTCTTCGGATTGTAAAGTTCTTTTCTAAGGGACGAAGAAAGTGACGGTACCTTAGGAATAAGCCTCGGCTAACTACGTGCCAGCAGCCGCGGTAATACGTAGGAGGCAAGCGTTATCCGGAATGACTGGGCGTAAAGGGTGCGTAGGTGGTTTGGCAAGTTGGCGGCGTAACTCCGAGGCTAAACCTCGGAACTACCGCCAAAACTGTTGAACTTGAGTGCAGGAGGGGCAATTGGAATTCCTAGTGTAGCGGTGGAATGCGTAGATATTAGGAGGAACACCAGTGGCGAAGGCGAATTGCTGGACTGTAACTGACACTGAGG…	>denovo76457	Bacteria;Firmicutes;Clostridia;Clostridiales	0.261449		0.00668107				0.00923162														0.0167499																						0.00523387		0.00396244
CCTACGGGTGGCTGCAGTGGGGGATATTGCACAATGGGGGAAACCCTGATGCAGCGACGCCGCGTGAAGGAAGAAGGCCTTCGGGTTGTAAACTTCTGTCGTACGGGACGATAATGACGGTACCGTACAAGAAAGCCACGGCTAACTACGTGCCAGCAGCCGCGGTAAAACGTAGGTGGCAAGCGTTGTCCGGAATTACTGGGTGTAAAGGGAGCGCAGGCGGACTAGCAAGTTGGAAGTGAAATCTATGGGCTCAACCCATAAATTGCTTTCAAAACTGCCGGTCTTGAGTGGTGCAGAGGTAGGCGGAATTCCTAGTGTAGCGGTGGAATGCGTAGATATCGGGAGGAACACCAGTGGCGAAGGCGGCCTACTGGACACCAACTGACGCTGAGGCTC…	>denovo125682	Bacteria;Firmicutes;Clostridia;Clostridiales;Ruminococcaceae	0.260689										0.00208655	0.00711288	0.00290875																						0.00112887	0.00917936			0.00337615		0.00242657
CCTATGGGAGGCAGCAGTGGGGAATATTGCACAATGGGGGAGACCCTGATGCAGCGACGCCGCGTGAGTGAAGAAGTATTTCGGTATGTAAAGCTCTATCAGCAGGGAAGAAAATGACGGTACCTGACTAAGAAGCACCGGCTAAATACGTGCCAGCAGCCGCGGTAATACGTATGGTGCAAGCGTTATCCGGATTTACTGGGTGTAAAGGGAGCGTAGACGGAGAAGCAAGTCTGGAGTGAAAGCCCGGGGCTCAACCCCGGGACTGCTTTGGAAACTGTTTGTCTTGAGTGCCGGAGATGTAAGCGGAATTCCTAGTGTAGCGGTGAAATGCGTAGATAGTAGGAGGAACACCAGCGGCGAAGGCGGCTTACTGGACGGCAACTGACGTTGAGGCTC…	>denovo90349	Bacteria;Firmicutes;Clostridia;Clostridiales;Lachnospiraceae;Ruminococcus2	0.260562		0.260562	0.0417119	0.0150883		0.0184632	0.0540123	0.0272306						0.01443	0.00822684	0.00365738		0.00573987	0.0410931	0.00669994		0.00759705		0.00891663			0.00142108	0.00383416			0.0100612	0.0064222		0.00112887		0.00197297		0.00675231				0.00872311	0.00482369	0.00792487		0.00469903
CCTACGGGTGGCTGCAGTGGGGAATATTGGGCAATGGGGGAAACCCTGGCCCAGCAACGCCGCGTGAAGGGAGAAGGCCTTCGGGTTGTAAACTTCTTTTACCAGGGACGAAGGACGTGACGGTACCTGGAGAAAAAGCCACGGCCAACTACGTGCCAGCAGCCGCGGTAATACGTAGGTGGCAAGCGTTGTCCGGAATTACTGGGTGTAAAGGGCGTGTAGGCGGAGCTGCAAGTCAGATGTGAAATCTCCGGGCTTAACCCGGAAACTGCATTTGAAACTGTAGCCCTTGAGTATCGGAGAGGCAAGCGGAATTCCTAGTGTAGCGGTGAAATGCGTAGATATTAGGAAGAACACCAGTGGCGAAGGCGGCTTACTGGACAGTAACTGACGTTGAGG…	>denovo137289	Bacteria;Firmicutes;Clostridia;Clostridiales;Ruminococcaceae	0.2589			0.00278079	0.00502942		0.0184632	0.0231481	0.0363075							0.00274228	0.00365738				0.00334997			0.00304535	0.0014861						0.00283086	0.00201223	0.118811										0.00174462		0.00396244
CCTACGGGGGGCTGCAGTGGGGAATATTGGGCAATGGGCGCAAGCCTGACCCAGCAACGCCGCGTGAAGGATGAAGGCTTTCGGGTTGTAAACTTCTTTTATCAGGGACGAAACAAATGACGGTACCTGATGAATAAGCCACGGCTAACTACGTGCCAGCAGCCGCGGTAATACGTCGGTGGCAAGCGTTATCCGGATTTACTGGGTGTAAAGGGCGTGTAGGCGGGACTGCAAGTCAGATGTGAAAGCGATGAGCTCAACCCATAGCCTGCATTTGAAACTGTAGTTCTTGAGTGCTGAAGAGGCAATCGGAATTCCGGGTGTAGCGGTGAAATGCGTAGATATACGGAGGAACACCAGTGGCGAAGGCGGATTGCTGGACAGTAACTGACGCTGAGG…	>denovo65611	Bacteria;Firmicutes;Clostridia;Clostridiales;Ruminococcaceae;Pseudoflavonifractor	0.258485		0.00668107	0.0389311	0.00502942		0.258485	0.0154321	0.00907688										0.0172196	0.0369838	0.0200998				0.00594442																			0.00241185
CCTACGGGGGGCAGCAGTGGGGAATATTGCACAATGGGGGAAACCCTGATGCAGCGACGCCGCGTGAGCGAAGAAGTATCTCGGTATGTAAAGCTCTATCAGCAGGGAAGAAAATGACGGTACCTGACTAAGAAGCACCGGCTAAATACGTGCCAGCAGCCGCGGTAATACGTATGGTGCAAGCGTTATCCGGATTTACTGGGTGTAAAGGGAGCGTAGACGGAGGAGCAAGTCTGGGGTGAAAGCCCGGGGCTCAACCCCTGGACTGCTTTGGAAACTGTTTGTCTAGAGTGGCGGAGAGGTAAGCGGAATTCCTAGTGTCGCGGTGAAATGCGTAGATATTAGGAGGAACACCAGTGGCGAACGCGGCTTACTGGACGGTAACTGACGTTGAGGCTC…	>denovo38218	Bacteria;Firmicutes;Clostridia;Clostridiales;Lachnospiraceae;Coprococcus	0.257069		0.0155892	0.00556158	0.00502942						0.17527	0.00569031	0.00872626		0.01924	0.0850107	0.0402311		0.0086098	0.00410931							0.010502	0.00426324	0.0153366		0.00283086	0.00201223	0.0032111		0.0146753	0.00458968	0.0414324		0.0168808	0.0440178	0.0230524		0.0750188	0.00241185	0.0118873
CCTACGGGTGGCTGCAGTGGGGAATATTGCACAATGGGGGAAACCCTGATGCAGCGACGCCGCGTGAGTGAAGAAGTATTTCGGTATGTAAAGCTCTATCAGCAGGGAAGAAAATGACGGTACCTGACTAAGAAGCCCCGGCTAACTACGTGCCAGCAGCCGCGGTAATACGTAGGGAGCGAGCGTTGTCCGGAATTACTGGGTGTAAAGGGTGCGTAGGCGGCAGAGCAAGTCAGATGTGAAATACACGGGCTTAACCCGTGGGCTGCATTTGAAACTGTTCAGCTTGAGTGGAGCAGAGGCAGGCGGAATTCCCGGTGTAGCGGTGAAATGCGTAGAGATCGGGAGGAACACCAGTGGCGAAGGCGGCCTGCTGGGCTTTAACTGACGCTGAGGCAC…	>denovo22388	Bacteria;Firmicutes;Clostridia;Clostridiales;Ruminococcaceae	0.254926		0.00222702	0.0250271	0.00502942		0.0369265	0.0462963							0.00481	0.00548456	0.00365738		0.00573987	0.0164372	0.00334997						0.015753	0.0298427	0.024283														0.0174462	0.00964739	0.00396244		0.00469903
CCTACGGGGGGCAGCAGTGAGGAATATTGGTCAATGGCCGGGAGGCTGAACCAGCCAAGTAGCGTGAAGGATGACGGCCCTACGGGTTGTAAACTTCTTTTATGCGGGATTAACGTGAGGTACGCGTACCTTATTGCAGGTACCGCATGAATAAGCATCGGCTAACTCCGTGCCAGCAGCCGCGGTAATACGTAGGTGGCAAGCGTTATCCGGATTTACTGGGTGTAAAGGGCGTGTAGGCGGGATTGCAAGTCAGATGTGAAAACTGGGGGCTCAACCTCCAGCCTGCATTTGAAACTGTAGTTCTTGAGTGCTGGAGAGGCAATCGGAATTCCGTGTGTAGCGGTGAAATGCGTAGATATACGGAGGAACACCAGTGGCGAAGGCGGATTGCTGGAC…	>denovo30428	Bacteria;Firmicutes;Clostridia;Clostridiales;Ruminococcaceae;Flavonifractor	0.254842
CCTACGGGCGGCAGCAGTGGGGAATATTGCACAATGGGGGAAACCCTGATGCAGCGACGCCGCGTGAGCGAAGAAGTATTTCGGTATGTAAAGCTCTATCAGCAGGGAAGAAAATGACGGTACCTGACTAAGAAGCTCCGGCTAAATACGTGCCAGCAGCCGCGGTAATACGTATGGAGCAAGCGTTATCCGGATTTACTGGGTGTAAAGGGAGCGTAGACGGAGGAGCAAGTCTGGTGTGAAAGGCGGGGGCTTAACCCCTGGACTGCATTGGAAACTGTTTTTCTAGAGTGCCGGAGAGGTAAGCGGAATTCCTAGTGTAGCGGTGAAATGCGTAGATATTAGGAGGAACACCAGTGGCGAAGGCGGCTTACTGGACGGTAACTGACGTTGAGGCTC…	>denovo8975	Bacteria;Firmicutes;Clostridia;Clostridiales;Lachnospiraceae	0.25463			0.00278079	0.0201177			0.25463												0.00410931									0.00127805
CCTACGGGTGGCAGCAGTGGGGAATATTGCACAATGGGGGAAACCCTGATGCAGCGACGCCGCGTGAGCGAAGAAGTATTTCGGTATGTAAAGCTCTATCAGCAGGGAAGAAATTGACGGTACCTGACTAAGAAGCACCGGCTAAATACGTGCCAGCAGCCGCGGTAATACGTATGGTGCACGCGTTATCCGGATTTACTGGGTGTAAAGGGAGCGTAGACGGGGCAGCAAGTCTGGAGTGAAAACCCGGGGCTCAACCCCGGGACTGCTTTGGAAACTTTGGTTATAGAGGGCTGGAGAGGGAAGTGGAATTCCTAGTGTAGCGGTGAAATGCGTAGATATTAGGAGGAACACCAGTGGCGAAGGCGGCTTACTGGACAGTAACTGACGTTGAGGCTC…	>denovo30621	Bacteria;Firmicutes;Clostridia;Clostridiales;Lachnospiraceae;Ruminococcus2	0.254417		0.00890809		0.0100588						0.0104328	0.125187	0.0276331		0.00481	0.0164537	0.0329164							0.00304535				0.0298427	0.0166147						0.0124176	0.013769	0.0118378			0.00419217							0.0234951
CCTACGGGAGGCTGCAGTGGGGGATATTGCACAATGGGGGAAACCCTGATGCAGCGACGCCGCGTGAGGGAAGAAGGTTTTCGGATTGTAAACCTCTGTCTTCAGTGACGAAATGAGACGGTAACTGAGGAGGAAGCCACGGCTAACTACGTGCCAGCAGCCGCGGTAATACGTAGGGAGCAAGCGTTGTCCGGATTTACTGGGTGTAAAGGGTGCGTAGGCGGTTTGGTAAGTCAGAAGTGAAATCCATGGGCTTAACCCATGAACTGCTTTTGAAACTATCGAACTTGAGTGAAGTAGAGGTAGGCGGAATTCCCGGTGTAGCGGTGAAATGCGTAGAGATCGGGAGGAACACCAGTGGCGAAGGCGGCCTACTGGGCTTTAACTGACGCTGAGGCA…	>denovo87704	Bacteria;Firmicutes;Clostridia;Clostridiales;Ruminococcaceae;Clostridium IV	0.254153		0.00668107	0.00556158			0.113857	0.108025	0.254153										0.00286993	0.00410931				0.00304535			0.005251
CCTACGGGAGGCAGCAGTGGGGAATATTGGGCAATGGGCGCAAGCCTGACCCAGCAACGCCGCGTGAAGGAAGAAGGCCCTCGGGTTGTAAACTTCTTTTGTCAGGGACGAAGCAAGTGACGGTACCTGACGAATAAGCCACGGCTAACTACGTGCCAGCAGCCGCGGTAATACGTAGGTGGCGAGCGTTGTCCGGAATTACTGGGTGTAAAGGGAGCGTAGGCGGGAAGACAAGTTGGACGTTAAATTTATCGGCTTAACCGGTAACCGCGTTCAAAACTGTTTTTCTTGAGTGAAGTAGAGGTTGGCGGAATTCCTAGTGTAGCGGTGAAATGCGTAGATATTAGGAGGAACACCAGTGGCGAAGGCGGCCAACTGGGCTTTAACTGACGCTGAGGC…	>denovo21670	Bacteria;Firmicutes;Clostridia;Clostridiales;Ruminococcaceae;Clostridium IV	0.253011			0.00278079			0.00307721								0.03367	0.00822684	0.00365738						0.00759705	0.0213174	0.00297221		0.005251	0.0454746	0.00766832		0.00283086												0.00697849		0.00396244		0.0140971
CCTACGGGAGGCTGCAGTGGGGAATATTGCACAATGGGGGGAACCCTGATGCAGCGACGCCGCGTGAGTGAAGAAGTACTTCGGTATGTAAAGCTCTATCAGCAGGGAAGAAAATGACGGTACCTGACTAAGAAGCCCCGGCTAACTACGTGCCAGCAGCCGCGGTAATACGTAGGGGGCAAGCGTTATCCGGAATTACTGGGTGTAAAGGGTGCGTAGGTGGCAGGGCAAGTCAGAAGTGAAAACCCGGGGCTTAACCCCGGGATTGCTTTGGAAACTGTTTAACTGGAGTGCAGGAGAGGTAAGCGGAATTCCTAGTGTAGCGGTGAAATGCGTAGATATTAGGAGGAACACCAGTGGCGAAGGCGGCTTACTGGACTGTAACTGACGTTGAGGCTC…	>denovo98276	Bacteria;Firmicutes;Clostridia;Clostridiales;Lachnospiraceae;Anaerostipes	0.250832		0.00668107		0.00502942		0.0184632	0.0385802	0.00907688							0.00548456			0.0688784	0.0328745	0.0133999			0.0578616	0.014861		0.005251	0.0198951	0.00383416		0.0537863	0.00201223	0.0160555										0.0854865	0.250832	0.118873		0.0704854
CCTACGGGAGGCAGCAGTGAGGAATATTGGTCAATGGACGGAAGTCTGAACCAGCCATGCCGCGTGCAGGATGACGGCTCTATGAGTTGTAAACTGCTTTTGTACGAGGGTAAACCCGAATACGTGTATTCGGCTGAAAGTATCGTACGAATAAGGATCGGCTAACTCCGTGCCAGCAGCCGCGGTAATACGGAGGATCCAAGCGTTATCCGGATTTATTGGGTTTAAAGGGTGCGTAGGCGGTCAGATAAGTTAGAGGTGAAATTCCGGTGCTTAACACCGGCGCTGCCTCTAATACTGTTTGACTAGAGAGTAGTTGCGGTAGGCGGAATGTATGGTGTAGCGGTGAAATGCTTAGATATCACGAAGAACTCCGATTGCGAAGGCAGCTCACTAGAC…	>denovo86768	Bacteria;Bacteroidetes;Bacteroidia;Bacteroidales;Rikenellaceae;Alistipes	0.250585
CCTACGGGTGGCTGCAGTGGGGAATATTGCACAATGGGGGAAACCCTGATGCAGCGACGCCGCGTGAGCGAAGAAGTATTTCGGTATGTAAAGCTCTATCAGCAGGGAAGAAATTGACGGTACCTGACTAAGAAGCACCGGCTAAATACGTGCCAGCAGCCGCGGTAATACGTATGGTGCAAGCGTTATCCGGATTTACTGGGTGTAAAGGGAGCGTAGACGGAGCAGCAAGTCTGGAGTGAACACCCGGGGCTCAACCCCGGGAATGCTTTGGAAACTGTTGTTCTAGAGTGCTGGAGAGGTAAGTGGAATTCCTAGTGTAGCGGTGAAATGCGTAGATATTAGGAAGAACACCAGTGGCGAAGGCGGCTTTCTGGACTGTAACTGACGCTGAGGCTC…	>denovo115904	Bacteria;Firmicutes;Clostridia;Clostridiales;Lachnospiraceae;Ruminococcus2	0.250398															0.00274228	0.0109721
CTAGGGGGCAGCAGTGGGGAATATTGGGCAATGGGCGCAAGCCTGACCCAGCAACGCCGCGTGAAGGAAGAAGGCTTTCGGGTTGTAAACTTCTTTTATCAGGGACGAACAAAATGACGGTACCTGATGAATAAGCCACGGCTAACTACGTGCCAGCAGCCGCGGTAATACGTAGGTGGCAAGCGTTATCCGGATTTACTGGGTGTAAAGGGAGCGTAGACGGTGAATCAAGTCTGGAGTGAAAACCCGGGGCTTAACCCCGGGATTGCTTTGGAAACTGTTTAACTGGAGTGCAGGAGAGGTAAGCGGAATTCCTAGTGTAGCGGTGAAATGCGTAGATATTAGGAGGAACACCAGTGGCGAAGGCGGCTTACTGGACTGTAACTGACGTTGAGGCTC…	>denovo37448	Bacteria;Firmicutes;Clostridia;Clostridiales	0.248247		0.00445405	0.0222463	0.0150883		0.015386										0.00365738								0.00445831								0.0032111											0.00482369
TCTACGGGTGGCAGCAGTGGGGGATATTGCACAATGGGGGAAACCCTGATGCAGCGACGCCGCGTGAGTGAAGAAGTATTTCGGTATGTAAAGCTCTATCAGCAGGGAAGAAAATGACGGTACCTGACTAAGAAGCCCCGGCTAACTACGTGCCAGCAGCCGCGGTAATACGTAGGGGGCAAGCGTTATCCGGATTTACTGGGTGTAAAGGGAGCGTAGACGGTGAAGCAAGTCTGGAGTGAAAACCCGGGGCTTAACCCCGGGATTGCTTTGGAAACTGTTTAACTGGAGTGCAGGAGAGGTAAGCGGAATTCCTAGTGTAGCGGTGAAATGCGTAGATATTAGGAGGAACATCGGTGGCGAAGGCGACTTACGGGACTGTAACTGACACTGAGGCAC…	>denovo29487	Bacteria;Firmicutes;Clostridia;Clostridiales;Lachnospiraceae;Clostridium XlVa	0.247651		0.00445405	0.0166847	0.00502942		0.00307721									0.00274228			0.0114797	0.0205465	0.0133999		0.00759705	0.00913604	0.0104027		0.021004	0.0568432	0.0664588			0.00201223											0.0104677	0.0168829	0.00792487		0.00939805
CCTACGGGGGGCAGCAGTGGGGAATATTGCACAATGGGGGAAACCCTGATGCAGCGACGCCGCGTGAGCGAAGAAGTATTTCGGTATGTAAAGCTCTATCAGCAGGGAAGAAATTGACGGTACCTGACTAAGAAGCACCGGCTAAATACGTGCCAGCAGCCGCGGTAATACGTATGGTGCAAGCGTTATCCGGATTTACTGGGTGTAAAGGGAGCGTAGACGGAGCAGCAAGTCTGGAGTGAAAACCCGGGGCTCAACCCCGGGACTGCTTTGGAAACTGTTGTTCTAGAGTGCTGGAGAGGTAAGTGGAATTCCTAGTGTAGCGGTGAAATGCGTAGATATTAGGAGGAACACCAGTGGCGAAGGCGGCCCCCTGGACGAAGACTGACGCTCAGGTGC…	>denovo38596	Bacteria;Firmicutes;Clostridia;Clostridiales;Lachnospiraceae;Ruminococcus2	0.247288		0.00668107		0.0150883			0.0154321			0.00625965	0.036987	0.0130894		0.01443	0.00548456	0.0329164			0.00410931			0.00759705				0.010502	0.0071054	0.0166147		0.00283086				0.00564436	0.00688452	0.00789188		0.00337615	0.00628825				0.00241185	0.00396244		0.0234951
CCTACGGGTGGCTGCAGTGGGGAATATTGGGCAATGGGCGCAAGCCTGACCCAGCAACGCCGCGTGAAGGAAGAAGGCCCTCGGGTTGTAAACTTCTTTTGTCAGGGACGAAGCAAGTGACGGTACCTGACGAATAAGCCACGGCTAACTACGTGCCAGCAGCCGCGGTGATACGTAGGTGGCAAGCGTTGTCCGGAATTACTGGGTGTAAAGGGAGCGCAGGCGGGAGAGCAAGTCAGCTGTGAAAACCACGGGCTTAACCTGTGGACTGCAGTTGAAACTGTTCTTCTTGAGTGAAGTAGAGGTAAGCGGAATTCCGAGTGTAGCGGTGAAATGCGTAGAGATTCGGAGGAACACCAGTGGCGAAGGCGGCTTACTGGGCTTTAACTGACGCTGAGG…	>denovo46888	Bacteria;Firmicutes;Clostridia;Clostridiales;Ruminococcaceae	0.246901		0.0133621	0.0278079	0.0150883		0.00923162								0.01924									0.00609069			0.068263	0.0653697	0.0639027		0.00283086	0.00402447	0.0224777		0.00451549	0.00229484	0.00197297		0.00506423				0.00523387
CCTACGGGTGGCAGCAGTGGGGAATATTGCACAATGGGGGAAACCCTGATGCAGCGACGCCGCGTGAGGGAAGAAGGTTTTCGGATTGTAAACCTCTGTCTTTGGTGACGATAATGACGGTAACCAAAGAGGAAGCTACGGCTAACTACGTGCCAGCAGCCGCGGTAATACGTAGGTGGCAAGCGTTGTCCGGAATTACTGGGTGTAAAGGGAGCGTAGGCGGGGAGACAAGTTGAATGTTTAAACTATCGGCTCAACTGATAGTCGCGTTCAAAACTATCACTCTTGAGTGCAGTAGAGGTAGGCGGAATTCCTAGTGTAGCGGTGAAATGCGTAGATATTAGGAGGAACACCAGTGGCGAAGGCGGCCTACTGGGCTGTAACTGACGCTGAGGCTCG…	>denovo95276	Bacteria;Firmicutes;Clostridia;Clostridiales;Ruminococcaceae	0.246221		0.0244972	0.0111232	0.0150883				0.00907688															0.00304535	0.00297221		0.026255	0.00994756	0.00511221														0.013957
CCTACGGGTGGCTGCAGTGGGGAATATTGCACAATGGGGGAAACCCTGATGCAGCGACGCCGCGTGAGCGAAGAAGTATTTCGGTATGTAAAGCTCTATCAGCAGGGAAGATAATGACGGTACCTGGCTAAGAAGCCCCGGCTAACTACGTGCCAGCAGCCGCGGTAATACGTAGGGGGCAAGCGTTATCCGGATTTACTGGGTGTAAAGGGAGCGTAGACGGCGAAGCAAGTCTGGTGTGAAAACCCGGGGCTCAACCCCGGGACTGCTTTGGAAACTGTTGGTCTAGAGTGCTGGAGAGGTAAGTGGAATTCCTAGTGTAGCGGTGAAATGCGTAGATATTAGGAGGAACACCAGTGGCGAAGGCGGCTTACTGGACAGTAACTGACGTTGAGGCTC…	>denovo73915	Bacteria;Firmicutes;Clostridia;Clostridiales;Lachnospiraceae;Ruminococcus2	0.2457		0.00222702												0.00962001	0.00274228					0.00334997				0.00297221				0.00127805				0.0032111														0.00939805
CCTACGGGAGGCAGCAGTGGGGAATATTGGGCAATGGGCGCAAGCCTGACCCAGCAACGCCGCGTGAAGGAAGAAGGCCCTCGGGTTGTAAACTTCTTTTGTCAGGGACGAAGCAAGTGACGGTACCTGACGAATAAGCCACGGCTAACTACGTGCCAGCAGCCGCGGTAATACGTAGGTGGCAAGCGTTATCCGGATTTACTGGGTGTAAAGGGCGCGCAGGCGGGCCGGCAAGTTGGGAGTGAAATCCGGGGGCTTAACCCCCGAACTGCTTTCAAAACTGCTGGTCTTGAGTGATGGAGAGGCAGGCGGAATTCCGTGTGTAGCGGTGAAATGCGTAGATATACGGAGGAACACCAGTGGCGAAGGCGGCCTGCTGGACATTAACTGACGCTGAGG…	>denovo136645	Bacteria;Firmicutes;Clostridia;Clostridiales;Ruminococcaceae	0.245465		0.00668107	0.0500542	0.0301765		0.0400037	0.0540123	0.0363075						0.1443	0.0438765	0.0329164		0.00286993	0.0123279			0.0683735	0.0548162	0.0698469		0.152279	0.0483167	0.0587905		0.150035	0.0382325	0.112388		0.00112887								0.0331478	0.0168829	0.00792487		0.0328932
CCTACGGGGGGCAGCAGTGAGGAATATTGGTCAATGGTCGGCAGACTGAACCAGCCAAGTCGCGTGAAGGAAGACGGCCCTAAGGGTTGTAAACTTCTTTTGTCGGAGAGTAAAGGTCTTCACGAGTGGAGATTTGCAAGTATCCGAAGAAAAAGCATCGGCTAACTCCGTGCCAGCAGCCGCGGTAATACGGAGGATGCGAGCGTTATCCGGATTTATTGGGTTTAAAGGGTGCGTAGGCGGCATGACAAGTCAGCGGTGAAATGCCCGGGCTTAACCCGGGAGCTGCCGTTGAAACTGTCGAGCTAGCGTGCACAAGAGGTAGGCGGAATGCGTGGTGTAGCGGTGAAATGCTTAGATATCACGAAGAACTCCGATTGCGAAGGCAGCCTGCCGGGC…	>denovo63938	Bacteria;Bacteroidetes;Bacteroidia;Bacteroidales;Porphyromonadaceae;Barnesiella	0.242657											0.00142258	0.00145438			0.00274228																			0.00225774		0.00394594		0.22789	0.182359	0.242657
CCTACGGGAGGCAGCAGTGAGGAATATTGGTCAATGGCCGTAAGGCTGAACCAGCCAAGTAGCGTGAAGGACGACGGCCCTACGGGTTGTAAACTTCTTTTATAAGGGAATAAAGTTGCGTACGCGTACGCATTTGCATGTACCTTATGAATAAGCATCGGCTAACTCCGTGCCAGCAGCCGCGGTAATACGGAGGATGCGAGCGTTATCCGGATTTATTGGGTTTAAAGGGAGCGCAGACGGGAGGGTAAGTCAGCTGTGAAAGTTTGCGGCTCAACCGTAAAATTGCAGTTGAAACTGTCTTTCTTGAGTGCGGCAGAGGCAGGCGGAATTCGTGGTGTAGCGGTGAAATGCTTAGATATCACGAAGAACTCCGATTGCGAAGGCAGCCTACTAGGG…	>denovo53625	Bacteria;Bacteroidetes;Bacteroidia;Bacteroidales;Bacteroidaceae;Bacteroides	0.240702											0.00142258	0.00145438																						0.228032	0.144575	0.240702		0.00506423	0.00419217	0.00485313
CTTACGGGTGGCTGCAGTGGGGAATATTGCACAATGGGGGAAACCCTGATGCAGCGACGCCGCGTGAAGGAAGAAGTATCTCGGTATGTAAACTTCTATCAGCAGGGAAGAAAGTGACGGTACCTGACGAATAAGCCACGGCTAACTACGTGCCAGCAGCCGCGGTAATACGTATGGTGCAAGCGTTATCCGGATTTACTGGGTGTAAAGGGAGCGTAGACGGATAGGCAAGTCTGGAGTGAAAGCCCGGGGCTCAACCCCGGGACTGCTTTGGAAACTGTTTATCTAGAGTGCTGGAGAGGTAAGTGGAATTCCTAGTGTAGCGGTGAAATGCGTAGATATTAGGAGGAACACCAGTGGCGAAGGCGGCTTACTGGACAGTAACTGACGTTGAGGCTC…	>denovo77014	Bacteria;Firmicutes;Clostridia;Clostridiales;Lachnospiraceae;Coprococcus	0.240385		0.00668107	0.00834237	0.0150883		0.0123088	0.00771605	0.0453844		0.0041731	0.00711288	0.0218156		0.02405	0.0109691	0.0146295		0.0344392	0.00821862			0.0303882	0.0243628	0.0014861		0.047259	0.0582643	0.0498441		0.0368011	0.00804894	0.0610109		0.0135465	0.0367175	0.00394594		0.00337615				0.00523387	0.00241185	0.00792487		0.0140971
CCTACGGGTGGCTGCAGTGGGGGATATTGCACAATGGGGGAAACCCTGATGCAGCGACGCCGCGTGAGTGAAGAAGTATTTCGGTATGTAAAGCTCTATCAGCAGGGAAGAAAATGACGGTACCTGACTAAGAAGCACCGGCTAAATACGTGCCAGCAGCCGCGGTAATACGTATGGTGTAAGCGTTATCCGGCTTTACTGGGTGTACAGGGAGCGTAGACGGATGTGCAAGTCTGGAGTGAAAACCCGGGGCTCAACCCCGGGACTGCTTTGGAAACTGTATATCGTGAGTGCTGGAGAGGTAAGTGGAATTCCTAGTGTAGCGGTGAAATGCGTAGATATTAGGAGGAACACCAGTGGCGAAGGCGGCTTACTGGACAGTAACTGACGTTGAGGCTC…	>denovo57825	Bacteria;Firmicutes;Clostridia;Clostridiales;Lachnospiraceae;Ruminococcus2	0.2397						0.00307721				0.00208655	0.0426773	0.00872626			0.00274228	0.0182869		0.00573987				0.00759705	0.00304535	0.00594442		0.021004	0.0483167	0.0166147							0.00229484			0.00337615	0.00209608	0.00121328		0.00348924	0.00241185	0.00396244		0.00469903
CCTACGGGTGGCTGCAGTGGGGAATATTGCACAATGGGGGAAACCCTGATGCAGCGACGCCGCGTGAGCGAAGAAGTATTTCGGTATGTAAAGCTCTATCAGCAGGGAAGGAACTGACGGTACCTGACTAAGAAGCACCGGCTAAATACGTGCCAGCAGCCGCGGTAATACGTATGGTGCAAGCGTTATCCGGATTTACTGGGTGTAAAGGGAGCGTAGACGGAGCAGCAAGTCTGGAGTGAAAACCCGGGGCGCAACGCCGGGACTGCGTTGGAAACTGTTGTTCTAGAGTGCTGGAGAGGTAAGTGGAATTCCTAGTGTAGCGGTGAAATGCGGAGATATTAGGAGGAACACCAGGGGCGAAGGCGGCTTACTGGACGGTAACTGACGTTGAGGCTC…	>denovo44044	Bacteria;Firmicutes;Clostridia;Clostridiales;Lachnospiraceae;Ruminococcus2	0.238858		0.00668107		0.0150883						0.0083462	0.0113806	0.0130894		0.02405	0.0246805	0.0768049							0.0304535	0.00297221		0.015753	0.018474	0.0434538		0.00283086	0.00201223	0.0032111		0.0112887	0.0114742	0.0177567		0.00844039	0.00419217							0.0281942
CCTACGGGTGGCTGCAGTGGGGAATATTGCACAATGGGGGAAACCCTGATGCAGCGACGCCGCGTGAGCGAAGAAGTATCTCGGTATGTAAAGCTCTATCAGCAGGGAAGAAGATGACGGTACCTGACTAAGAAGCACCGGCTAAATACGTGCCAGCAGCCGCGGTAATACGTATGGTGCAAGCGTTATCCGGATTTACTGGGTGTAAAGGGAGCGTAGACGGAGAAGCACGTCTGGCGTGAAAGCCCGGGGCTCAACCCCGGGACTGCTTTGGAAACTGTTTGTCTTGAGTGCCGTAGAGGTAAGCGGAATTCCTAGTGTAGCGGTGAAATGCGTAGATATCAGGAGAAACACCAGTGGCGAAGGCGGTTTACTGGACGGCAACTGACGTTGAGGCTC…	>denovo78371	Bacteria;Firmicutes;Clostridia;Clostridiales;Lachnospiraceae;Coprococcus	0.23773		0.097989	0.00278079	0.00502942		0.00615441				0.00208655									0.00410931	0.00334997				0.0014861			0.00142108															0.00174462				0.00939805
CCTACGGGAGGCAGCAGTGGGGGATATTGCACAATGGGGGAAACCCTGATGCAGCAACGCCGCGTGAAGGAAGAAGGTCTTCGGATTGTAAACTTCTGTCCTCAGGGAAGATAATGACGGTACCTGAGGAGGAAGCTCCGGCTAACTACGTGCCAGCAGCCGCGGTAATACGTAGGGAGCGAGCGTTGTCCGGATTTACTGGGTGTAAAGGGAGCGTAGACGGAAGGGCAAGTCTGGAGTGAAAGCCCGGGGCTCAACCCCGGGACTGCTTTGGAAACTGTCCGTCTTGAGTGCCGGAGAGGTAAGCGGAATTCCTAGTGTAGCGGTGAAATGCGTAGATATTAGGAGGAACACCAGTGGCGAAGGCGGCTTACTGGACGGTAACTGACGTTGAGGCTC…	>denovo25567	Bacteria;Firmicutes;Clostridia;Clostridiales;Lachnospiraceae	0.237401						0.00923162	0.0154321					0.00727188			0.0383919			0.00286993	0.00410931	0.00669994				0.0178333		0.089267	0.0540011	0.0293952		0.0141543	0.00402447	0.0128444		0.00225774	0.00458968	0.00197297			0.00209608				0.00241185	0.00396244
CCTACGGGGGGCAGCAGTGGGGGATATTGCACAATGGGCGCAAGCCTGATGCAGCGACGCCGCGTGAGGGAAGACGGTCTTCGGATTGTAAACCTCTGTCTTCGGGGACGATAATGACGGTACCCGAGGAGGAAGCCACGGCTAACTACGTGCCAGCAGCCGCGGTAATACGTAGGTGGCGAGCGTTGTCCGGAATTACTGGGTGTAAAGGGCGTGTAGGCGGGATTGCAAGTCAGATGTGAAAACCACGGGCTCAACCTGTGGCCTGCATTTGAAACTGCAGTTCTTGAGTACTGGAGAGGCAGACGGAATTCCTAGTGTAGCGGTGAAATGCGTAGATATTAGGAGGAACACCAGTGGCGAAGGCGGTCTGCTGGACAGCAACTGACGCTGAGGCGC…	>denovo131309	Bacteria;Firmicutes;Clostridia;Clostridiales;Ruminococcaceae;Clostridium IV	0.234648		0.00222702												0.00962001								0.00759705	0.0213174	0.0014861			0.0412113	0.00255611			0.00201223	0.0064222												0.00396244		0.0281942
CCTACGGGGGGCTGCAGTGGGGAATATTGCACAATGGGGGAAGCCCTGATGCAGCGACGCCGCGTGAGTGAAGAAGTATTTCGGTATGTAAAGCTCTATCAGCAGGGAAGAAGATGACGGTACCTGAGTAAGAAGCCCCGGCTAACTACGTGCCAGCAGACGCGGTAATACGTATGGTGCAAGCGCTATCCGGATTTACTGGGTGTAAAGGGAGCGTAGACGGAAGAGCAAGTCTGGAGTTAAAGCCCGGGGCTCAACCCCGGGACTGCTTTGGAAACTGTTTATCTAGAGTGCCGGAGAGGCAAGCGGAATTCCTAGTGTAGCGGTGAAATGCGTAGATATTAGGAGGAACACCAGTGGCGAAGGCGGCTTGCTGGACGGTAACTGACGTTGAGGCTC…	>denovo17032	Bacteria;Firmicutes;Clostridia;Clostridiales;Lachnospiraceae	0.234477			0.00556158			0.00307721	0.00771605												0.00410931	0.0100499			0.00913604																				0.00482369	0.00792487
CCTACGGGAGGCAGCAGTGGGGAATATTGCACAATGGGGGAAACCCTGATGCAGCGACGCCGCGTGAGTGAAGAAGTATTTCGGTATGTAAAGCTCTATCAGCAGGGAAGAAGATGACGGTACCTGAGTAAGAAGCCCCGGCTAACTACGTGCCAGCAGCCGCGGTAATACGTAGGGGGCAAGCGTTATCCGGATTTACTGGGTGTAAAGGGAGCGTAGACGGTGAAGCAAGTCTGGAGTGAAAGCCCGGGGCTTAACTCCGGGACTGCTTTTGAAACTGCCAGGCTGGAGTGCAGGAGAGGTAAGCGGAATTCCTAGTGTAGCGGTGAAATGCGTAGATATTAGGAGGAACATCAGTGGCGAAGGCGGCTTACTGGACTGAAACTGACACTGAGGCAC…	>denovo61313	Bacteria;Firmicutes;Clostridia;Clostridiales;Lachnospiraceae;Anaerostipes	0.233784		0.0178162	0.0500542	0.0301765		0.0184632	0.0231481	0.0272306							0.00548456			0.126277	0.106842	0.0401997		0.0683735	0.106587	0.0475554		0.031506	0.0241584	0.0166147		0.0113234	0.034208	0.0224777										0.0819972	0.202595	0.233784		0.0516893
CCTACGGGGGGCTGCAGTGGGGAATATTGCACAATGGGGGAAACCCTGATGCAGCGACGCCGCGTGAAGGAAGAAGTATCTCGGTATGTAAACTTCTATCAGCAGGGAAGAAAATGACGGTACCTGACTAAGAAGCCCCGGCTAACTACGTGCCAGCAGCCGCGGTAATACGTAGGGGGCAAGCGTTATCCGGATTTACTGGGTGTAAAGGGAGCGTAGACGGAAGGGCAAGTCTGGAGTGAAAGCCCGGGGCTCAACCCCGGGACTGCTTTGGAAACTGTCCGTCTTGAGTGCCGGAGAGGTAAGCGGAATTCCTAGTGTAGCGGTGAAATGCGTAGATATTAGGAGGAACACCAGTGGCGAAAGCGGCTTTCTGGACGACAACTGACGCTGAGGCGC…	>denovo35473	Bacteria;Firmicutes;Clostridia;Clostridiales;Lachnospiraceae	0.233599								0.00907688						0.00481	0.00274228
CTACGGGGGGCAGCAGTGAGGAATATTGGTCAATGGACGAGAGTCTGAACCAGCCAAGTAGCGTGAAGGATGACTGCCCTATGGGTTGTAAACTTCTTTTATATGGGAATAAAGTATTCCACGTGTGGGATTTTGTATGTACCATATGAATAAGGATCGGCTAACTCCGTGCCAGCAGCCGCGGTAATACGGAGGATCCGAGCGTTATCCGGATTTATTGGGTTTAAAGGGAGCGTAGGTGGATTGTTAAGTCAGTTGTGAAAGTTTGCGGCTCAACCGTAAAATTGCAGTTGTTACTGGATGTCTTGAGTGCAGTTGAGGCAGGCGGAATTCGTGGTGTAGCGGTGAAATGCTTAGATATCACGAAGAACTCCGATTGCGAAGGCAGCCTGCTAAGCT…	>denovo112384	Bacteria;Bacteroidetes;Bacteroidia;Bacteroidales;Bacteroidaceae;Bacteroides	0.233347
CCTACGGGTGGCTGCAGTGGGGAATATTGCACAATGGGGGAAACCCTGATGCAGCGACGCCGCGTGAGCGAAGAAGTATTTCGGTATGTAAAGCTCTATCAGCAGGGAAGAAATTGACGGTACCTGACTAAGAAGCACCGGCTAAATACGTGCCAGTAGCCGCGGTAATACGTATGGTGCAAGCGTTATCCGGATTTACTGGGTGTAAAGGGCGCGTAGACGGAGCAGCAAGTCTGTAGTGAAAACCCGGGGCTCAACCCCGGGACTGCTTTGGAAACTGTTGTTCTAGAGTGCTGGAGAGGTAAGTGGAATTCCTAGTGTAGAGGTGAAATGCGTAGATATTAGGAGGAACACCAGGGGCGAAGGCGGCTTACTGAACAGTAACTGACGTTGAGGCTC…	>denovo47758	Bacteria;Firmicutes;Clostridia;Clostridiales;Lachnospiraceae;Ruminococcus2	0.233216		0.00222702	0.00278079	0.00502942						0.0041731	0.0753965	0.0101806		0.00481	0.00548456	0.029259							0.00609069	0.00297221			0.0127897	0.00766832		0.00283086		0.0032111		0.00903098		0.00591891		0.00506423	0.00628825							0.0187961
CCTACGGGTGGCTGCAGTGGGGAATATTGGGCAATGGGGGAAACCCTGACCCAGCAACGCCGCGTGAAGGAAGAAGGCCTTCGGGTTGTAAACTTCTTTTACCAGGGACGAAGGACGTGACGGTACCTGGAGAAAAAGCCACGGCTAACTACGTGCCAGCAGCCGCGGTAATACGTAGGTGGCAAGCGTTATCCGGATTTACTGGGTGTAAAGGGCGTGTAGGCGGGATTGCAAGTCAGATGTGAAAACCACGGGCTCAACCTGTGGCCTGCATTTGAAACTGCAGTTCTTGAGTACTGGAGAGGCAGACGGAATTCCTAGTGTAGCGGTGAAATGCGTAGATATTAGGAGGAACACCAGTGGCGAAGGCGGTCTGCTGGACAGCAACTGACGCTGAGG…	>denovo120757	Bacteria;Firmicutes;Clostridia;Clostridiales;Ruminococcaceae	0.232868		0.00222702	0.00278079	0.00502942		0.0184632	0.0231481	0.0816919							0.00274228								0.00609069	0.00297221						0.00849257	0.00201223	0.0834885
CCTACGGGAGGCAGCAGTGGGGAATATTGCACAATGGGGGAAACCCTGATGCAGCGACGCCGCGTGAAGGAAGAAGTATCTCGGTATGTAAACTTCTATCAGCAGGGAAGAAAATGACGGTACCTGACTAAGAAGCCCCGGCTAACTACGTGCCAGCAGCCGCGGTAATACGTAGGGGGCAAGCGTTATCCGGATTTACTGGGTGTAAAGGGTGCGTAGGTGGTTTAGCAAGTTGGCAGCGTAATTCCGGGGCTCAACTCCGGCGCTACTGCCAAAACTGTTGAACTTGAGTGCAGGAGGGGTAAGTGGAATTCCTAGTGTAGCGGTGGAATGCGTAGATATTAGGAGGAACATCGGTGGCGAAGGCGACTTACTGGACTGTAACTGACACTGAGGCAC…	>denovo57257	Bacteria;Firmicutes;Clostridia;Clostridiales;Lachnospiraceae	0.232543						0.00615441	0.00771605	0.00907688												0.00334997				0.0014861		0.021004	0.0824227	0.0664588
CCTACGGGTGGCAGCAGTGAGGAATATTGGTCAATGGGCGTAAGCCTGAACCAGCCAAGTCGCGTGAGGGATGAAGGTTCTATGGATCGTAAACCTCTTTTATAAGGGAATAAAGTGCGGGACGTGTCCCGTTTTGTATGTACCTTATGAATAAGGATCGGCTAACTCCGTGCCAGCAGCCGCGGTAATACGGAGGATCCGAGCGTTATCCGGATTTATTGGGTTTAAAGGGTGCGTAGGCGGCCTTTTAAGTCAGCGGTGAAAGTCTGTGGCTCAACCATAGAATTGCCGTTGAAACTGGGAGGCTTGAGTATGTTTGAGGCAGGCGGAATGCGTGGTGTAGCGGTGAAATGCTTAGATATCACGAAGAACTCCGATTGCGAAGGCAGCCTGCCGGGC…	>denovo47080	Bacteria;Bacteroidetes;Bacteroidia;Bacteroidales;Porphyromonadaceae;Parabacteroides	0.23252										0.00208655																								0.00225774	0.00229484	0.00394594		0.00506423
CTTACGGGTGGCTGCAGTGGGGAATATTGCACAATGGGGGAAACCCTGATGCAGCGACGCCGCGTGAGCGAAGAAGTATTTCGGTATGTAAAGCTCTATCAGCAGGGAAGATGATGACGGTACCTGACTAAGAAGCTCCGGCTAAATACGTGCCAGCAGCCGCGGTAATACGTATGGAGCAAGCGTTATCCGGATTTACTGGGTGTAAAGGGTGCGTAGGCGGCAGGGCAAGTCAGATGTGAAAGACCGGGGCTTAACTCCGGGGCTGCATTTGAAACTGCTTTGCTTGAGTCCGGGAGAGGCAGGCGGAATTCCTAGTGTAGCGGTGAAATGCGTAGATATTAGGAGGAACACCAGTGGCGAAGGCGGCCTGCTGTACCGGAACTGACGCTGAGGCAC…	>denovo70751	Bacteria;Firmicutes;Clostridia;Clostridiales;Lachnospiraceae	0.231246			0.0500542	0.0653825						0.0271252	0.0241838	0.011635						0.00573987	0.00410931															0.00903098	0.0160639	0.00986485		0.00506423	0.00838434	0.122542		0.0157016	0.00723554	0.0237746
CCTACGGGTGGCTGCAGTGGGGAATATTGGGCAATGGGCGCAAGCCTGACCCAGCAACGCCGCGTGAAGGATGAAGGCTTTCGGGTTGTAAACTTCTTTTATCAGGGACGAAACAAATGACGGTACCTGATGAATAAGCCACGGCTAACTACGTGCCAGCAGCCGCGGTAATACGTAGGTGGCAAGCGTTATCCGGATTTCCTGGGTGTAAAGGGCGTGTAGGCGGGACTGCAAGTCAGATTTGAAAACTATGGGCTCAACCCATAGCCTGCAATGGAAACGGTAGTTCTTGAGTGCTGGAGAGGCAACCGGAAGTCCGTGTGTAGCGGTGAAATGCATAGATATACGGAGGAACACCAGTGGCGAAGGCGGATTGCTGGACAGTAACTGACGCTGAGG…	>denovo83818	Bacteria;Firmicutes;Clostridia;Clostridiales;Ruminococcaceae;Pseudoflavonifractor	0.230791		0.0133621	0.0222463	0.00502942		0.230791												0.0172196	0.0410931																								0.00241185
CCTACGGGTGGCAGCAGTGGGGAATATTGGGCAATGGGCGCAAGCCTGACCCAGCAACGCCGCGTGAGCGAAGAAGTATTTCGGTATGTAAAGCTCTATCAGCAGGGAAGAAACTGACGGTACCTGACTAAGAAGCACCGGCTAAATACGTGCCAGCAGCCGCGGTAATACGTATGGTGCAAGCGTTATCCGGATTTACTGGGTGTAAAGGGAGCGTAGACGGAGCAGCAAGTCTGGAGTGAAAACCCGGGGCTCAACCCCGGGACTGCTTTGGAAACTGTTGTTCTAGAGTGCTGGAGAGGTAAGTGGAATTCCTAGTGTAGCGGTGAAATGCGTAGATATTAGGAGGAACACCAGTGGCGAAGGCGGCTTACTGGACAGTAACTGACGTTGAGGCTC…	>denovo85756	Bacteria;Firmicutes;Clostridia;Clostridiales;Lachnospiraceae;Ruminococcus2	0.230428		0.00445405		0.00502942		0.00923162	0.0154321	0.00907688		0.018779	0.0440999	0.0450857		0.0577201	0.019196	0.0841197		0.00286993	0.00410931			0.00759705	0.00913604	0.00297221		0.063012	0.0468957	0.0396197		0.0226469	0.00402447	0.0160555		0.044026	0.00917936	0.0394594		0.0135046	0.0167687	0.00242657		0.00174462	0.00482369			0.00939805
CTACGGGAGGCAGCAGTGGGGAATATTGCACAATGGGGGAAACCATGATGTAGCGACGCCGCGTGAAGGAAGAAGTATTTCGGTATGTAAACTTCTATCAGCAGGGAAGAAAATGACGGTACCTGAGTAAGAAGCCCCGGCTAACTACGTGCCAGCAGCCGCGGTAATACGTCGGGGGCAAGCGTTATCCGGATTTACTGGGTGTAAAGGGAGCGTAGACGGATAGGCAAGTCTGGAGTGAAAGCCCGGGGCTCAACCCCGGGACTGCTTTGGAAACTGTTTATCTAGAGTGCTGGAGAGGTAAGTGGAATTCCTAGTGTAGCGGTGAAATGCGTAGATATTAGGAGGAACACCAGTGGCGAAGGCGGCTTACTGGACAGTAACTGACGTTGAGGCTCG…	>denovo86320	Bacteria;Firmicutes;Clostridia;Clostridiales;Lachnospiraceae	0.230369		0.00668107		0.0251471		0.00923162	0.00771605	0.0363075		0.0104328	0.00853546	0.011635		0.01924	0.00822684	0.0109721		0.00286993				0.0379853	0.0121814	0.014861		0.005251	0.017053	0.0115025		0.0169851	0.0221346	0.0288999		0.00677323	0.0183587	0.0118378		0.00337615	0.00628825			0.00523387	0.00482369			0.0187961
CTTACGGGTGGCAGCAGTGGGGAATATTGCACAATGGGGGAAACCCTGATGCAGCGACGCCGCGTGAAGGAAGAAGTATCTCGGTATGTAAACTTCTATCAGCAGGGAAGAAAATGACGGTACCTGACTAAGAAGCCCCGGCTAACTACGTGCCAGCAGCCGCGGTAATACGTAGGGGGCAAGCGTTATCCGGATTTACTGGGTGTAAAGGGAGCGTAGACGGATAGGCAAGTCTGGAGTGAAAGCACGGGGCTCAACCCCGGGACTGCTTTGGAATCTTTTTATCTAGAGTGCTGGAGAGGTAAGTGGAATTCCTAGTGTAGCGGTTAAATGCGTAGATATTAGGAGGAACACCAGTTGCGAAGGCGGCTTACTGGACAGTAACTGACGTTGAGGCTC…	>denovo98121	Bacteria;Firmicutes;Clostridia;Clostridiales;Lachnospiraceae	0.230369		0.00222702	0.00556158			0.0215404	0.0154321	0.0181538		0.00625965		0.0290875		0.02405	0.0137114							0.00759705	0.00913604	0.00594442			0.018474	0.00383416		0.0283086	0.00402447	0.0224777		0.0169331	0.0275381	0.0197297		0.00506423	0.00209608			0.00348924		0.00396244		0.00469903
CCTACGGGTGGCTGCAGTGGGGAATATTGCGCAATGGAGGAAACTCTGACGCAGTGACGCCGCGTATGGGAAGAAGGTTTTCGGATTGTAAACCATTTTAGACAGGGAAGAAAAAAGACAGTACCTGTAGAATAAGCTCCGGCTAACTACGTGCCAGCAGCCGCGGTAATACGTAGGGAGCAAGCGTTATCCGGAATTATTGGGTGTAAAGGGTGCGTAGACGGGAAAGCAAGTTAGTTGTGAAATCCCTCGGCTTAACTGAGGAACTGCAACTAAAACTGTTTTTCTTGAGTGCTGGAGAGGAAAGTGGAATTTCTAGTGTAGCGGTGAAATGCGTAGATATTAGGAGGAACACCAGTGGCGAAGGCGACTTTCTGGACAGTAACTGACGTTGAGGCA…	>denovo116948	Bacteria;Firmicutes;Clostridia;Clostridiales	0.229387		0.00890809	0.0111232			0.00923162													0.00821862	0.0133999																							0.00241185
CCTACGGGAGGCTGCAGTGAGGAATATTGGTCAATGGGCGCAGGCCTGAACCAGCCAAGTAGCGTGAAGGATGACTGCCCTCTGGGTTGTAAACTTCTTTTATATGGGAGTAAAGTTTTCCACGTGTGGAATTTTGTATGTACCATATGAATAAGGATCGGCTAACTCCGTGCCAGCAGCCGCGGTAATACGGAGGATCCGAGCGTTATCCGGATTTATTGGGTTTAAAGGGAGCGTAGGTGGATTGTTAAGTCAGTTGTGAAAGTTTGCGGCTCAACCATAAAATTGCAGTTGAAACTGGCAGTCTTGAGTACAGTAGAGGTGGGCTGAATTCGTGGTGTAGCGGTGAAATGCTTAGATATTACGAAGAACTCCGATTGCGAAGGCAGCTCACTAGAC…	>denovo89565	Bacteria;Bacteroidetes;Bacteroidia;Bacteroidales;Bacteroidaceae;Bacteroides	0.2282
CTTATGGGAGGCTGCAGTGGGGAATATTGCACAATGGGGGAAACCCTGACGCAGCGACGCCGCGTGAAGGAAGAAGTATCTCGGTATGTAAACTTCTATCAGCAGGGAAGAAAATGACGGTACCTGACTAAGAAGCCCCGGCTAGCTACGTGCCAGCAGCCGCGGTAATACGTAGGGGGCAAGCGTTATCCGGATTTACTGGGTGTAAAGGGAGCGTAGACGGCGAAGCAAGTCTGAAGTGAAAACCCAGGGCTCAACCCTGGGACTGCTTTGGAAACTGTTTTGCTAGAGTGCTGGAGAGGTAAGTGGAATTCCTAGTGTAGCGGTGAAATGCATAGATAGTAGGAGGAACACCAGTGGCGAAGGCGGCTTACTGGACAGTAACTGACGTTGAGGCTC…	>denovo81147	Bacteria;Firmicutes;Clostridia;Clostridiales;Lachnospiraceae;Clostridium XlVa	0.227941			0.00278079			0.00307721	0.0154321	0.00907688		0.0041731	0.00711288	0.0101806		0.0673401	0.00548456	0.0109721		0.0172196				0.0151941	0.00609069	0.0014861		0.005251	0.00568432	0.00894637		0.00283086		0.0032111		0.00225774	0.0114742	0.00197297		0.00168808	0.00209608							0.00469903
CTACGGGGGGCAGCAGTGGGGAATATTGCACAATGGGGGAAACCCTGATGCAGCGACGCCGCGTGAGTGAAGAAGTATTTCGGTATGTAAAGCTCTATCAGCAGGGAAGAAAATGACGGTACCTGACTAAGAAGCCCCGGCTAACTACGTGCCAGCAGCCGCGGTAATACGTAGGGGGCAAGCGTTATCCGGATTTATTGGGTGTAAAGGGTGCGTAGACGGGTAATCAAGTTAGTTGTGAAATCCCTTAGCTTAACTGAGGAACTGCAACTAAAACTGGTTATCTTGAGTACAGGAGAGGTAAGTGGAATTCCTAGTGTAGCGGTGAAATGCGTAGATATTAGGAGGAAAACCAGTGGCGAAGGCGACTTACTGGACTGAAACTGACGTTGAGGCACG…	>denovo41765	Bacteria;Firmicutes;Clostridia;Clostridiales;Lachnospiraceae	0.226098		0.0111351	0.0194655			0.015386		0.00907688											0.0123279	0.0301497
CCTACGGTGGCAGCAGTGAGGAATATTGGTCAATGGCCGGAAGGCTGAACCAGCCAAGTAGCGTGAAGGACGACGGCCCTACGGGTTGTAAACTTCTTTTATAAGGGAATAAAGTTGTGTACGCGTACGCATTTGCATGTACCTTATGAATAAGCATCGGCTAACTCCGTGCCAGCAGCCGCGGTAATACGGAGGATGCGAGCGTTATCCGGATTTATTGGGTTTAAAGGGAGCGCAGACGGGAGGGTAAGTCAGCTGTGAAAGTTTGCGGCTCAACCGTAAAATTGCCGTTGAAACTGGGTTACTTGAGTGTGTTTGAGGTAGGCGGAATGCGTGGTGTAGCGGTGAAATGCATAGATATCACGCAGAACTCCAATTGCGAAGGCAGCTTACTAAACC…	>denovo134628	Bacteria;Bacteroidetes;Bacteroidia;Bacteroidales;Porphyromonadaceae;Parabacteroides	0.223071
CCTACGGGAGGCAGCAGTGGGGGATATTGCACAATGGGGGAAACCCTGATGCAGCAACGCCGCGTGAAGGAAGAAGGTCTTCGGATTGTAAACTTCTGTCCTCAGGGAAGATAATGACGGTACCTGAGGAGGAAGCTCCGGCTAACTACGTGCCAGCAGCCGCGGTAATACGTAGGGGGCAAGCGTTATCCGGATTTACTGGGTGTAAAGGGAGCGTAGACGGCGAAGCAAGTCTGAAGTGAAAACCCAGGGCTCAACCCTGGGACTGCTTTGGAAACTGTTTTGCTAGAGTGCTGGAGAGGTAAGTGGAATTCCTAGTGTAGCGGTGAAATGCGTAGATATTAGGAGGAACACCAGTGGCGAAGGCGGCTTACTGGACAGTAACTGACGTTGAGGCTC…	>denovo86926	Bacteria;Firmicutes;Clostridia;Clostridiales;Lachnospiraceae;Clostridium XlVa	0.219432												0.00872626		0.01443	0.0301651			0.00286993						0.00445831		0.026255	0.0554221	0.047288		0.00283086	0.00201223				0.00458968					0.00121328
CCTACGGGGGGCAGCAGTTAGGAATATTCGTCAATGGAGGAAACTCTGAACGAGCAATGCCGCGTGAGTGATGAAGGTCTTATAGATTGTAAAACTCTGTTGTAAGGGACGAACCCTTGTCATAGGAAATGATGACAAGCTGACGGTACCTTGCCAGAAAGCTCCGGCTAACTACGTGCCAGCAGCCGCGGTAATACGTAGGGAGCGAGCGTTATCCGGATTTATTGGGCGTAAAGGGTGCGTAGGCGGTTTGTTAAGTCTAAGATTAAAGCCCGAGGCTTAACCTCGGTTCGTTTTAGAAACTGGCAGACTTGAGTATGGCAGAGGCAAGTGGAATTTCTAGTGTAGCGGTAAAATGCGTAGATATTAGAAGGAACACCAGTGGCGAAGGCGGCTTGC…	>denovo28836	Bacteria;Firmicutes;Erysipelotrichia;Erysipelotrichales;Erysipelotrichaceae	0.218829		0.00222702	0.13904	0.0150883			0.00771605	0.00907688												0.00334997
TCTACGGGTGGCTGCAGTGAGGGATATTGGTCAATGGGGGAAACTCTGAACCAGCAACGCCGCGTGAGGGATGACGGCCTTCGGGTTGTAAACCTCTGTCCTCTGTGAAGATAATGACGGTAGCAGAGGAGGAAGCCCCGGCTAACTACGTGCCAGCAGCCGCGGTAATACGTAGGGAGCAAGCGTTGTCCGGATTTACTGGGTGTAAAGGGTGCGTAGGCGGTTTGGTAAGTCAGAAGTGAAATCCATGGGCTTAACCCGTGAACTGCTTTTGAAACTATCGAACTTGAGTGAAGTAGAGGTAGGCGGAATTCCCGGTGTAGCGGTGAAATGCGTAGAGATCGGGAGGAACACCAGTGGCGAAGGCGGCCTGCTGGGCACCAACTGACGCTGAGGCTC…	>denovo124176	Bacteria;Firmicutes;Clostridia;Clostridiales;Ruminococcaceae;Faecalibacterium	0.217845		0.0267243		0.0251471		0.0184632	0.0308642	0.217845												0.0167499																							0.00241185
CCTACGGGTGGCAGCAGTGAGGGATATTGGTCAATGGGGGAAACCCTGGATCAGCAACGCCGCGTGAGGGATGACGGTCTTCGGATTGTAAACCTCTGTCCTCTGTGAAGATAATGACGGTAGCAGAGGAGGAAGCTCCGGCTAACTACGTGCCAGCAGCCGCGGTAATACGTAGGGAGCAAGCGTTGTCCGGATTTACTGGGTGTAAAGGGTGCGTAGGCGGCTCGGCAAGTCAGAGGTGAAATCCATGGGCTTAACCCATGAACTGCCTTTGAAACTGCCGAACTTGAGCGAAGTAGAGGTAGGCGGAATTCCCGGTGTAGCGGTGAAATGCGTAGAGATCGGGAGGAACACCAGTGGCGAAGGCGGCCTGCTGGGCTTTAACTGACGCTGAGGCAC…	>denovo59244	Bacteria;Firmicutes;Clostridia;Clostridiales;Ruminococcaceae	0.216265			0.00834237	0.216265				0.00907688			0.00142258												0.00304535								0.00201223			0.00225774	0.00917936				0.00209608	0.00121328
CCTACGGGTGGCTGCAGTGGGGAATATTGCACGATGGGGGAAACCCTGATGCAGCGACGCCGCGTGAGCGAAGAAGTATTTCGGTATGTAAAGCTCTATCAGCAGGGAAGAAAGTGACGGTACCTGACTAAGAAGCACCGGCTAAATACGTGCCAGCAGCCGCGGTAATACGTATGGTGCAAGCGTTATCCGGATTTACTGGGTTTAAAGGGAGCGTAGACGGCGAAGCAAGTTTGAAGTGAAAACCCAGGGCTCAACCCTGGGACTGCTTTGGAAACTGTTTTGCTAGAGTGCTGGAGAGGTAAGTGGAATTCCGAGTGTAGCGGTGAAATGCGTAGATATTAGGAGGAACACCAGTGGCGAAGGCGGCTTACTGGACAGTAACTGACGTTGAGGCTC…	>denovo73832	Bacteria;Firmicutes;Clostridia;Clostridiales;Lachnospiraceae;Ruminococcus2	0.215944		0.00222702	0.00278079								0.00569031	0.00145438		0.00481	0.00274228	0.00731475		0.00573987								0.005251	0.00284216	0.00255611		0.00283086					0.00458968			0.00337615				0.00523387	0.00241185	0.00396244
CCTACGGGAGGCAGCAGTGGGGGATATTGCACAATGGGGGAAACCCTGATGCAGCAACGCCGCGTGAAGGAAGAAGGTCTTCGGATTGTAAACTTCTGTCCTCAGGGAAGATAATGACGGTACCTGAGGAGGAAGCTCCGGCTAACTACGTGCCAGCAGCCGCGGTAATACGTAGGTGGCAAGCGTTATCCGGAATGACTGGGCGTAAAGGGTGCGTAGGTGGTTTAGCAAGTTGGCAGCGTAATTCCGGGGCTCAACTCCGGCGCTACTGCCAAAACTGTTGAACTTGAGTGCAGGAGGGGTAAGTGGAATTCCTAGTGTAGCGGTGGAATGCGTAGATATTAGGAGGAACATCGGTGGCGAAGGCGACTTACTGGACTGTAACTGACACTGAGGCAC…	>denovo72617	Bacteria;Firmicutes;Clostridia;Clostridiales	0.215835																										0.015753	0.0426324	0.0447319
CCTACGGGTGGCTGCAGTGGGGAATATTGGGCGATGGGCGCAAGCCTGACCCAGCAACGCCGCGTGAAGGATGAAGGCTTTCGGGTTGTAAACTTCTTTTGTCAGGGACGAAGCAAGTGACGGTACCTGACGAATAAGCCACGGCTAACTACGTGCCAGCAGCCGCGGTAATACGTAGGTGGCAAGCGTTATCCGGATTTACTGGGTGTAAAGGGCGTGTAGGCGGGATGGCAAGTCAGATGTGAAAACCACGGGCTCAACCTGTGGCCTGCATTTGAAACTGCTGTTCTTGAGTGATGGAGAGGCAGGCGGAATTCCGTGTGTAGCGGTGAAATGCGTAGATATACGGAGGAACACCAGTGGCGAAGGCGGCCTGCTGGACATTAACTGACGCTGAGG…	>denovo76153	Bacteria;Firmicutes;Clostridia;Clostridiales;Ruminococcaceae;Pseudoflavonifractor	0.215404		0.0155892	0.0166847	0.0150883		0.215404	0.0771605							0.00481	0.0109691	0.0182869		0.00286993					0.00609069	0.00445831		0.005251		0.00383416		0.00283086		0.0064222										0.013957	0.00241185	0.00396244		0.00939805
CCTACGGGTGGCAGCAGTGGGGAATATTGGGCAATGGGCGCAAGCCTGACCCAGCAACGCCGCGTGAAGGAAGAAGGCCCTCGGGTTGTAAACTTCTTTTGTCAGGGACGAAGCAAGTGACGGTACCTGACGAATAAGCCACGGCTAACTACGTGCCAGCAGCCGCGGTAATACGTAGGTGGCAAGCGTTATCCGGATTTACTGGGTGTAAAGGGCGTGTAGGCGGGATTGCAAGTCAGATGTGAAAACCACGGGCTCAACCTGTGGCCTGCATTTGAAACTGCAGTTCTTGAGTACTGGAGAGGCAGACGGAATTCCTAGTGTAGCGGTGAAATGCGTAGAGATCGGGAGGAACACCAGTGGCGAAGGCGGCCTGCTGGGCCTTAACTGACGCTGAGG…	>denovo111	Bacteria;Firmicutes;Clostridia;Clostridiales;Ruminococcaceae;Clostridium IV	0.215297		0.0133621		0.00502942		0.0830846	0.0231481	0.0816919			0.00142258	0.00290875		0.10101	0.0356496	0.0438885		0.00286993	0.0164372			0.0303882	0.0365441	0.0208055		0.21004	0.0952124	0.0779612		0.0141543	0.0060367	0.0160555		0.00677323	0.00458968			0.0135046		0.00363985		0.00523387	0.00964739			0.00469903
CCTACGGGTGGCAGCAGTGGGGAATATTGCACAATGGGGGAAACCCTGATGCAGCGACGCCGCGTGAGCGAAGAAGTATTTCGGTATGTAAAGCTCTATCAGCAGGGAAGAAACTGACGGTACCTGACTAAGAAGCACCGGCTAAATACGTGCCAGCAGCCGCGGTAATACGTATGGTGCAAGCGTTATCCGGATTTACTGGGTGTAAAGGGTGCGTAGGCGGCAGAGCAAGTCAGATGTGAAAGACCGGGGCTCAACCCCGGGGCTGCATTTGAAACTGTTTTGCTGGAGTCCGGGAGAGGCAGGCGGAATTCCTAGTGTAGCGGTGAAATGCGTAGATATTAGGAGGAACACCAGTGGCGAAGGCGGCTTACTGGACAGTAACTGACGTTGAGGCTC…	>denovo69057	Bacteria;Firmicutes;Clostridia;Clostridiales;Lachnospiraceae	0.214988							0.00771605			0.00625965	0.00426773	0.00290875		0.01443	0.0356496	0.0402311				0.00334997															0.00229484	0.00197297			0.00209608					0.00396244
CCTACGGGAGGCAGCAGTGGGGAATATTGCACAATGGGGGAAACCCTGATGCAGCGACGCCGCGTGAAGGAAGAAGTATCTCGGTATGTAAAGCTCTATCAGCAGGGAAGAAACTGACGGTACCTGACTAAGAAGCACCGGCTAAATACGTGCCAGCAGCCGCGGTAATACGTATGGTGCAAGCGTTATCCGGATTTACTGGGTGTAAAGGGAGCGTAGACGGTAATGCAAGTCTGGAGTGAAAACCCGGGGCTCAACCCCGGGACTGCTTTGGAAACTGTATAACTGGAGTGCCGGAGAGGTAAGCGGAATTCCTAGTGTAGCGGTGAAATGCGTAGATATTAGGAGGAACACCAGTGGCGAAGGCGGCTTACTGGACGGTAACTGACGTTGAGGCTC…	>denovo105999	Bacteria;Firmicutes;Clostridia;Clostridiales;Lachnospiraceae	0.214792		0.0133621	0.0194655			0.00923162				0.0166924	0.0298741	0.0101806				0.00731475		0.00286993	0.0123279	0.00334997			0.00609069	0.0118888			0.00142108	0.00127805						0.00338662	0.013769	0.0138108		0.00168808	0.00419217			0.0104677	0.00723554	0.0118873		0.0234951
CCTACGGGTGGCTGCAGTGGGGAATATTGCACAATGGGGGAAACCCTGATGCAGCGACGCCGCGTGAGCGAAGAAGTATCTCGGTATGTAAAGCTCTATCAGCAGGGAAGAAAATGACGGTACCTGACTAAGAAGCACCGGCTAAATACGTGCCAGCAGCCGCGGTAATACGTATGGTGCAAGCGTTATCCGGATTTACTGGGTGTAAAGGGAGCGTAGACGGAGAAGCAAGTCTGGAGTGAAAGCCCGGTGCTCAACCCCGGGACTGCTTTGGACACTGTTTGTCTTGAGTGCCGGGGAGGTAAGCGGAATTCCTAGTGTAGCGGGGAAATGCGTAGAGATTAGGAGGAACACCAGTGGCGAAGGCGGCTTACTGGACGGCAAATGACGTTGAGGCTC…	>denovo71133	Bacteria;Firmicutes;Clostridia;Clostridiales;Lachnospiraceae;Coprococcus	0.214724		0.144756	0.0194655	0.0150883		0.00307721				0.0125193									0.00410931	0.00334997							0.00142108	0.00383416								0.00197297		0.00168808				0.00872311		0.00396244
CCTACGGGTGGCTGCAGTGGGGGATATTGCACAATGGGCGCAAGCCTGATGCAGCGACGCCGCGTGAGTGAAGAAGTATTTCGGTATGTAAAGCTCTATCAGCAGGGAAGAAGATGACGGTACCTGAGTAAGAAGCCCCGACTAACTACGTGCCAGCAGCCGCGGTAATACGTAGGGGGCAAGCGTTATCCGGATTTACTGGGTGTAAAGGGAGCGTAGACGGTGAAGCAAGTCTGGAGTGAAAACCCGGGGCTTAACCCCGGGATTGCTTTGGAAACTGTTTAACTGGAGTGCAGGAGAGGTAAGCGGAATTCCTAGTGTAGCGGTGAAATGCGTAGATATTAGGAGGAACATCAGTGGCGAAGGCGGCTTACTGGACTGAAACTGACACTGAGGCAC…	>denovo52641	Bacteria;Firmicutes;Clostridia;Clostridiales;Lachnospiraceae	0.212403		0.0155892	0.0222463	0.0201177			0.00771605	0.0181538			0.00142258				0.00548456			0.132017	0.0410931	0.0468996		0.0911646	0.088315	0.0222916		0.021004	0.0156319	0.0166147		0.00283086	0.0281713	0.0032111								0.00121328		0.0872311	0.192948	0.174347		0.0610874
CCTACGGGGGGCAGCAGTGGGGAATATTGGGCAATGGGCGCAAGCCTGACCCAGCAACGCCGCGTGAAGGAAGAAGGCCCTCGGGTTGTAAACTTCTTTTGTCAGGGACGAAGCAAGTGACGGTACCTGACGAATAAGCCACGGCTAACTACGTGCCAGCAGCCGCGGTAATACGTAGGTGGCAAGCGTTGTCCGGAATTACTGGGTGTAAAGGGAGCGTAGGCGGGGATGCAAGTTGAATGTCAAAGCCAGGGGCTCAACCCCTGATCGCGTTCAAAACTGTATCTCTTGAGTGAAGTAGAGGCAGGCGGAATTCCTAGTGTAGCGGTGAAATGCGTAAATATTAGGAGGAACACCAGTGGCGAAGGCGGCCTGCTGGGCTTTAACTGACGCTGAGGC…	>denovo127526	Bacteria;Firmicutes;Clostridia;Clostridiales;Ruminococcaceae;Clostridium IV	0.212253			0.00278079			0.00307721					0.00569031				0.00548456	0.00365738							0.00304535	0.00297221		0.021004	0.0156319	0.00894637						0.0079021	0.00229484			0.00337615	0.00209608	0.00242657		0.00697849	0.00723554	0.00396244
CCTATGGGTGGCTGCAGTGGGGAATATTGCACAATGGGGGAAACCCTGATGCAGCGACGCCGCGTGAGCGAAGAAGTATCTCGGTATGTAAGGCTCTATCAGCAGGGAAGAAAATGACGGTACCTGACTAAGAAGCACCGGCTAAATACGTGCCAGCAGCCGCGGTAATACGTAGGGGGCAAGCGTTATCCGGATTTACTGGGTGTAAAGGGAGCGTAGACGGTGAAGCAAGTCTGGAGTGAAAACCCGGGGCTTAACCCCGGGATTGCTTTGGAAACGGTTTAACTGGGGTGCAGGAGAGGTAAGCGGAATTCCTAGTGTAGCGGTGAAATGCGTAGATATTAGGAGGAACACCAGTGGCGAAGGCGGCTTACTGGACGGTAACTGACGTTGAGGCTC…	>denovo10081	Bacteria;Firmicutes;Clostridia;Clostridiales;Lachnospiraceae	0.211099		0.0579026	0.0695198	0.0251471		0.0215404				0.0250386	0.0398321	0.0058175		0.00962001	0.00548456	0.0146295		0.0315693	0.0616396	0.0200998			0.0274081	0.0178333		0.042008	0.0113686	0.0460099			0.00201223	0.0128444		0.00112887		0.00591891		0.0118165	0.0104804	0.00242657		0.211099	0.0458251	0.0713238		0.0422912
CCTACGGGTGGCTGCAGTGGGGAATATTGCACAATGGGGGAAACCCTGATGCAGCGACGCCGCGTGAGTGAAGAAGTATTTCGGTATGTAAAGCTCTATCAGCAGGGAAGAAAATGACGGTACCTGACTAAGAAGCCCCGGCTAACTACGTGCCAGCAGCCGCGGTAATACGTAGGGGGCAAGCGTTATCCGGATTTACTGGGTGTAAAGGGAGCGTAGACGGTAATGCAAGTCTGGAGTGAAAACCCGGGGCTCAACCCCGGGACTGCTTTGGAAACTGTATAACTGGAGTGCCGGAGGGGTGAATGGAATTCCTAGTGTAGCGGTGGAATGCGTAGATATTAGGAGGAACACCAGTGGCGAAGGCGGCTTACTGGACGGCAACTGACGTTGAGGCTC…	>denovo86149	Bacteria;Firmicutes;Clostridia;Clostridiales;Lachnospiraceae;Clostridium XlVa	0.21074						0.00307721	0.00771605			0.00208655	0.00284515	0.00145438			0.00274228			0.00573987	0.00410931	0.00669994				0.00297221										0.00112887		0.00197297		0.00168808	0.00419217	0.00121328		0.00174462	0.00241185			0.00469903
CCTACGGGTGGCAGCAGTGAGGAATATTGGTCAATGGCCGTAAGGCTGAACCAGCCAAGTAGCGTGAAGGACGACGGCCCTACGGGTTGTAAACTTCTTTTATAAGGGAATAAAGTTGCGTACGCGTACGCATTTGCATGTACCTTATGAATAAGCATCGGCTAACTCCGTGCCAGCAGCCGCGGTAATACGGAGGATGCGAGCGTTATCCGGATTTATTGGGTTTAAAGGGAGCGTAGGCGGACGCTTAAGTCAGTTGTGAAAGTTTGCGGCTCAACCGTAAAATTGCAGTTGATACTGGGTGTCTTGAGTACAGTAGAGGCAGGCGGAATTCGTGGTGTAGCGGTGAAATGCTTAGATATCACGAAGAACTCCGATTGCGAAGGCAGCCTGCTGGAC…	>denovo66188	Bacteria;Bacteroidetes;Bacteroidia;Bacteroidales;Bacteroidaceae;Bacteroides	0.210201
CCTACGGGTGGCAGCAGTGGGGGATATTGCACAATGGGCGAAAGCCTGATGCAGCGACGCCGCGTGAGGGAAGACGGCCTTCGGGTTGTAAACCTCTGTCATTCGGGACGAATTGATGACGGTACCGAAGAAGGAAGCTCCGGCTAACTACGTGCCAGCAGCCGCGGTAATACGTAGGGAGCGAGCGTTGTCCGGAATTACTGGGTGTAAAGGGAGCGTAGGCGGGAAAGCAAGTTGGAAGTGAAATGCATGGGCTTAACCCATGAGCTGCTTTCAAAACTGTTTTTCTTGAGTGAAGTAGAGGCAGGCGGAATTCCTAGTGTAGCGGTGAAATGCGTAGATATTAGGAGGAACACCAGTGGCGAAGGCGGCCTGCTGGGCTTTAACTGACGCTGAGGC…	>denovo20019	Bacteria;Firmicutes;Clostridia;Clostridiales;Ruminococcaceae;Anaerotruncus	0.20934		0.20934	0.150163	0.130765		0.00615441	0.0154321	0.00907688										0.0086098		0.0100499										0.00283086	0.00402447											0.00174462	0.00723554	0.0198122
CCTACGGGTGGCAGCAGTGGGGAATATTGGGCAATGGGCGCAAGCCTGACCCAGCAACGCCGCGTGAAGGAAGAAGGCCCTCGGGTTGTAAACTTCTTTTGTCAGGGACGAAGCAAGTGACGGTACCTGACGAATAAGCCACGGCTAACTACGTGCCAGCAGCCGCGGTAATACGTAGGTGGCAAGCGTTGTCCGGAATTACTGGGTGTAAAGGGAGCGTAGGCGGGGAGACAAGTCGGGTGTTAAATCTATCGGCTCAACTGGTAGCAGCACTCGAAACTGTAACTCTTGAGTGAAGTAGAGGTAAGCGGAATTCCTAGTGTAGCGGTGAAATGCGTAAATATTAGGAGGAACACCAGTGGCGAAGGCGGCTTACTGGGCTTTAACTGACGCTGAGGC…	>denovo87983	Bacteria;Firmicutes;Clostridia;Clostridiales;Ruminococcaceae	0.20925		0.00668107				0.20925	0.0540123	0.108923											0.00821862	0.00334997											0.00201223	0.0032111														0.00469903
CCTACGGGGGGCTGCAGTGAGGGATATTGGTCAATGGGGGAAACCCTGAACCAGCAACGCCGCGTGAGGGATGACGGCCTTCGGGTTGTAAACCTCTGTCCTCTGTGAAGATAATGACGGTAGCAGAGGAGGAAGCTCCGGCTAACTACGTGCCAGCAGCCGCGGTAATACGTAGGGAGCAAGCGTTGTCCGGATTTACTGGGTGTAAAGGGTGCGTAGGCGGTTTGGTAAGTCAGAAGTGAAATCCATGGGCTTAACCCATGAACTGCTTTTGAAACTATCGAACTTGAGTGAAGTAGAGGTAGGCGGAATTCCGTGTGTAGCGGTGAAATGCGTAGATATACGGAAGAACACCAGTGGCGAAGGCGGCCTACTGGGCACCAACTGACGCTGAGGCTC…	>denovo136543	Bacteria;Firmicutes;Clostridia;Clostridiales;Ruminococcaceae;Faecalibacterium	0.208768		0.0111351		0.0100588		0.00923162	0.0617284	0.208768										0.00286993	0.00410931													0.0032111						0.00168808		0.00121328
CCTACGGGAGGCAGCAGTGAGGGATATTGGTCAATGGGGGAAACCCTGAACCAGCAACGCCGCGTGAGGGATGACGGCCTTCGGGTTGTAAACCTCTGTCCTCTGTGAAGATAATGACGGTAGCAGAGGAGGAAGCTCCGGCTAACTACGTGCCAGCAGCCGCGGTAATACGTAGGGAGCAAGCGTTGTCCGGATTTACTGGGTGTAAAGGGTGCGTAGGCGGCAGAGCAAGTCAGGCGTGAAAGCCATGGGCTTAACCCATGAACTGCGCTTGAAACTGTTCTGCTTGAGTGAAGTAGAGGCAGGCGGAATTCCCGGTGTAGCGGTGAAATGCGTAGAGATCGGGAGGAACACCAGTGGCGAAGGCGGCCTGCTGGGCTTTAACTGACGCTGAGGCAC…	>denovo57850	Bacteria;Firmicutes;Clostridia;Clostridiales;Ruminococcaceae;Clostridium IV	0.207963		0.00890809		0.0100588		0.0246177	0.0617284	0.0907688						0.00481				0.0114797					0.00609069	0.00743052		0.084016	0.0554221	0.0217269										0.00506423				0.00697849	0.00241185
CCTACGGGGGGCAGCAGTAGGGAATCTTCCACAATGGACGCAAGTCTGATGGAGCAACGCCGCGTGAGTGAAGAAGGTTTTCGGATCGTAAAGCTCTGTTGTTGGTGAAGAAGGATAGAGGTAGTAACTGGCCTTTATTTGACGGTAATCAACCAGAAAGTCACGGCTAACTACGTGCCAGCAGCCGCGGTAATACGTAGGTGGCAAGCGTTGTCCGGATTTATTGGGCGTAAAGGGAACGCAGGCGGTCTTTTAAGTCTGATGTGAAAGCCTTCGGCTTAACCGGAGTAGTGCATTGGAAACTGGAAGACTTGAGTGCAGAAGAGGAGAGTGGAACTCCATGTGTAGCGGTGAAATGCGTAGATATATGGAAGAACACCAGTGGCGAAAGCGGCTCTC…	>denovo43721	Bacteria;Firmicutes;Bacilli;Lactobacillales;Lactobacillaceae;Lactobacillus	0.206984																								0.0014861		0.005251		0.00383416																		0.00469903
CCTACGGGGGGCAGCAGTCGGGAATATTGCGCAATGGAGGGAACTCTGACGCAGTGACGCCGCGTATAGGAAGAAGGTTTTCGGATTGTAAACTATTGTCGTTAGGGAAGAGAAAGGACAGTACCTAAGGAGGAAGCTCCGGCTAACTACGTGCCAGCAGCCGCGGTAATACGTAGGGAGCGAGCGTTATCCGGATTTACTGGGTGTAAAGGGAGCGTAGACGGTGAAGCAAGTCTGGAGTGAAAACCCGGGGCTTAACCCCGGGATTGCTTTGGAAACTGTTTAACTGGAGTGCAGGAGAGGTAAGCGGAATTCCTAGTGTAGCGGTGAAATGCGTAGATATTAGGAGGAACACCAGTGGCGAAGGCGGCTTACTGGACTGTAACTGACGTTGAGGCT…	>denovo133945	Bacteria;Firmicutes;Clostridia;Clostridiales;Lachnospiraceae	0.206718			0.0305887	0.00502942															0.00410931	0.00669994																						0.0471048	0.00241185	0.00792487
CCTACGGGGGGCAGCAGTGGGGGATATTGCACAATGGGCGCAAGCCTGATGCAGCGACGCCGCGTGAGGGAAGACGGTCTTCGGATTGTAAACCTCTGTCTTCGGGGACGATAATGACGGTACCCGAGGAGGAAGCCACGGCTAACTACGTGCCAGCAGCCGCGGTAATACGTAGGGAGCAAGCGTTGTCCGGATTTACTGGGTGTAAAGGGTGCGTAGGCGGTTTGGTAAGTCAGAAGTGAAATCCATGGGCTTAACCCATGAACTGCTTTTGAAACTATCGAACTTGAGTGAAGTAGAGGTAGGCGGAATTCCCGGTGTAGCGGTGAAATGCGTAGAGATCGGGAGGAACACCAGTGGCGAAGGCGGCCTACTGGGCTTTAACTGACGCTGAGGCAC…	>denovo47390	Bacteria;Firmicutes;Clostridia;Clostridiales;Ruminococcaceae;Clostridium IV	0.206032		0.00445405		0.00502942				0.0272306															0.00609069	0.0014861		0.005251	0.0369481	0.0102244		0.00566171																0.00939805
CCTACGGGCGGCAGCAGTGGGGAATATTGCACAATGGGGGGAACCCTGATGCAGCAACGCCGCGTGAAGGAAGAAGTATTTCGGTATGTAAACTTCTATCGACAGGGAAGAAAGAGATGACGGTACCTGAATAAGAAGCACCGGCTAAATACGTGCCAGCAGCCGCGGTAATACGTATGGTGCGAGCGTTATCCGGATTTACTGGGTGTAAAGGGTGAGTAGGCGGTTAAGCAAGTCATATGTGAAATTTTGGGGCTCAACCTCAGAGCTGCATAAGAAACTGTTTAACTAGAGTACAGGAGAGGTAAGCGGAATTCCTAGTGTAGCGGTGAAATGCGTAGATATTAGGAAGAACACCGGTGGCGAAGGCGGCTTACTGGACTGGAAACTGACGCTGAG…	>denovo124419	Bacteria;Firmicutes;Clostridia;Clostridiales;Lachnospiraceae;Clostridium XlVb	0.205778		0.0133621	0.205778			0.0400037	0.00771605	0.00907688											0.0205465	0.0502496			0.0121814	0.0624164		0.015753	0.00852648	0.125249		0.00283086	0.00402447	0.032111										0.00348924	0.0120592	0.0198122		0.0610874
CCTACGGGGGGCAGCAGTGGGGGATATTGCACAATGGGCGCAAGCCTGATGCAGCGACGCCGCGTGAGGGAAGACGGTCTTCGGATTGTAAACCTCTGTCTTCGGGGACGATAATGACGGTACCCGAGGAGGAAGCCACGGCTAACTACGTGCCAGCAGCCGCGGTAATACGTAGGTGGCGAGCGTTGTCCGGAATTATTGGGCGTAAAGGGAGCGCAGGCGGGAAGTTAAGCGGACTTTAAAAGTGCGGGGCTCAACCCCGTGAGGGGGTCCGAACTGACTTTCTTGAGTGCAGGAGAGGGAAGCGGAATTCCTAGTGTAGCGGTGAAATGCGTAGATATTAGGAAGAACACCAGTGGCGAAGGCGGCTTTCTGGACTGTAACTGACGCTGAGGCTCG…	>denovo107076	Bacteria;Firmicutes;Negativicutes;Selenomonadales;Veillonellaceae;Megamonas	0.204871
CCTACGGGAGGCAGCAGTGGGGAATATTGCGCAATGGGCGAAAGCCTGACGCAGCGACGCCGCGTGCGGGATGGAGGCCTTCGGGTTGTAAACCGCTTTTATCGGGGAGCAAGCGAGAGTGAGTGTACCCGTTGAATAAGCACCGGCTAACTACGTGCCAGCAGCCGCGGTAATACGTAGGGTGCAAGCGTTATCCGGATTTATTGGGCGTAAAGGGCTCGTAGGCGGTTCGTCGCGTCTGGTGTGAAAGTCCATCGCTTAACGGTGGATCTGCGCCGGGTACGGGCGGGCTGGAGTGCGGCAGGGGAGACTGGAATTCCCGGTGTAACGGTGGAATGTGTAGATATCGGGAAGAACACCAATGGCGAAGGCAGGTCTCTGGGCCGTTACTGACGCTGA…	>denovo12128	Bacteria;Actinobacteria;Actinobacteria;Bifidobacteriales;Bifidobacteriaceae;Bifidobacterium	0.203968															0.0466188	0.0402311
CCTACGGGTGGCAGCAGTGGGGAATATTGCACAATGGGCGCAAGCCTGATGCAGCGACGCCGCGTGCGGGATGGAGGCCTTCGGGTTGTAAACCGCTTTTGTTCAAGGGCAAGGCACGGTCTTTGGCCGTGTTGAGTGGATTGTTCGAATAAGCACCGGCTAACTACGTGCCAGCAGCCGCGGTAATACGTAGGGTGCAAGCGTTATCCGGATTTATTGGGCGTAAAGGGCTCGTAGGCGGTTCGTCGCGTCCGGTGTGAAAGTCCATCGCTTAACGGTGGATCCGCGCCGGGTACGGGCGGGCTTGAGTGCGGTAGGGGAGACTGGAATTCCCGGTGTAACGGTGGAATGTGTAGATATCGGGAAGAACACCAATGGCGAAGGCAGGTCTCTGGGCCG…	>denovo125802	Bacteria;Actinobacteria;Actinobacteria;Bifidobacteriales;Bifidobacteriaceae;Bifidobacterium	0.203921																										0.010502		0.00127805
CCTACGGGTGGCTGCAGTGGGGAATATTGCACAATGGGGGAAACCCTGATGCAGCGACGCCGCGTGAGTGAAGAAGAATTTCGGTATGTAAAGCTCTATTAGCAGGGAAGAAGAAAGACGGTACCTGACTAAGAAGCCCCGGCTAACTACGTGCCAGCAGCCGCGGTAATACGTAGGGGGCAAGCGTTATCCGGATTTACTGGGTGTAAAGGGAGCGTAGACGGCGAAGCAAGTCTGAAGTGAAAGCCCGGGGCTCAACCGCGGGACTGCTTTGGAAACTGTTTTGCTAGAGTGCTGGGGAGGTAGATGGAATTCCTAGTGTAGCGGTGAAATGCGTAGATATTAGGAGGAACACCAGTGACGAAGGCGGCTTACTGGACAGTAACTGACGTTGAGGCT…	>denovo23373	Bacteria;Firmicutes;Clostridia;Clostridiales;Lachnospiraceae;Clostridium XlVa	0.202094										0.0083462	0.00426773	0.011635		0.02405	0.0137114	0.0109721										0.005251								0.0101598	0.00688452	0.0118378			0.00209608
CCTACGGGTTGCTGCAGTGGGGAATATTGCACAATGGGGGAAACCCTGATGCAGCGACGCCGCGTGAGCGAAGAAGTATTTCGGTATGTAAAGCTCTATCAGCAGGGAAGAAATTGACGGTACCTGACTAAGAAGCACCGGCTAAATACGTGCCAGCAGCCGCGGTAATACGTATGGTGCAAGCGTTATCCGGATTTACTGGGTGTAAAGGGAGCGTAGACGGAGCAGCAAGTCTGGAGTGAAAACCCGGGGCTCAACCCCGGGACTGCTTTGGAAACTTTTGTTCTAGAGTGCTGGAGAGATAAGTGGAATTCCTAGTGTAGCGGTGAAATGCGTAGATATTAGGAGGAACACCAGTGGCGAAGGCGTCTTACTGGACAGTAACTGATGTTGAGGCTC…	>denovo86674	Bacteria;Firmicutes;Clostridia;Clostridiales;Lachnospiraceae;Ruminococcus2	0.202094		0.00668107	0.00278079				0.00771605			0.0104328	0.169287	0.02327		0.02405	0.00548456	0.0621754				0.00334997		0.00759705	0.00913604	0.00297221			0.0198951	0.0255611			0.00201223	0.00963329		0.0270929	0.00688452	0.0157838		0.00337615	0.00628825			0.00348924				0.0751844
CCTACGGGGGGCAGCAGTAGGGAATATTGCACAATGGGGGAAACCCTGATGCAGCGACGCCGCGTGAGCGAAGAAGTATCTCGGTATGTAAAGCTCTATCAGCAGGGAAGAAGATGACGGTACCTGACTAAGAAGCACCGGCTAAATACGTGCCAGCAGCCGCGGTAATACGTATGGTGCAAGCGTTATCCGGATTTGCTGGGTGTAAAGGGAGCGTAGACGGACTTGCAAGTCTGAAGTGAAAGCCCGGGGCTCAACCCCGGGACTGCTTTGGAAACTGTAGGTCTAGAGTGCTGGAGGGGTAAGTGGAATTCCTAGTGTAGCGGTGAAATGCGTAGATATTAGGAGGAACACCAGTGGCGAAGGCGGCTTACTGGACAGTAACTGACGTTGAGGCTC…	>denovo1091	Bacteria;Firmicutes;Clostridia;Clostridiales;Lachnospiraceae;Coprococcus	0.202006		0.0289513	0.066739	0.0100588		0.00307721		0.0181538		0.0083462	0.202006	0.00290875							0.0123279	0.00334997		0.00759705	0.00304535	0.0014861										0.00338662	0.00229484	0.00197297		0.00506423	0.00419217	0.00121328		0.0157016	0.00241185	0.00792487
CCTACGGGTGGCAGCAGTGGGGAATATTGCACAATGGGGGAAACCCTGATGCAGCGACGCCGCGTGAAGGAAGAAGTATCTCGGTATGTAAACTTCTATCAGCAGGGAAGAAAATGACGGTACCTGACTAAGAAGCCCCGGCTAACTACGTGCCAGCAGCCGCGGTAATACGTAGGGGGCAAGCGTTATCCGGAATTACTGGGTGTAAAGGGTGCGTAGGTGGCAGGGCAAGTCAGAAGTGAAAGCCCGGGGCTTAACTCCGGGACTGCTTTTGAAACTGCCAGGCTGGAGTGCAGGAGAGGTAAGCGGAATTCCTAGTGTAGCGGTGAAATGCGTAGATATTAGGAGGAACACCAGTGGCGAAGGCGGCTTACTGGACAGTAACTGACGTTGAGGCTC…	>denovo8807	Bacteria;Firmicutes;Clostridia;Clostridiales;Lachnospiraceae	0.201742		0.0334053	0.0111232			0.015386	0.0231481	0.181538						0.00481	0.019196	0.00731475		0.0660085	0.0246558	0.0200998		0.0683735	0.0669976	0.0178333		0.021004	0.0483167	0.0217269		0.0962491	0.0160979	0.0256888										0.0453602	0.0868265	0.0356619		0.0422912
CCTATGGGAGGCAGCAGTGGGGAATCTTCCGCAATGGGCGAAAGCCTGACGGAGCAACGCCGCGTGAGCGAAGACGGCCTTCGGGTTGTAAAGCTCTGTTATACGGGACGAATGGCTAGTGTGCCAATACCACATTAGAATGACGGTACCGTAAGAGAAAGCCACGGCTAACTACGTGCCAGCGGCCGCGGTAATACGTAGGTGGCAAGCGTTGTCCGGAATTATTGGGCGTAAAGGGCGCGCAGGCGGTTTCATAAGTCTGTCTTAAAAGTGCGGGGCTTAACCCCGTGAGGGGACGGAAACTGTGAGACTGGAGTGTTGGAGAGGAAAGCGGAATTCCTAGTGTAGCGGTGAAATGCGTAGATATTAGGAGGAACACCAGTGGCGAAGGCGGCTTAC…	>denovo31781	Bacteria;Firmicutes;Negativicutes;Selenomonadales;Veillonellaceae;Megasphaera	0.2017
CCTACGGGAGGCAGCAGTGGGGGATATTGCACAATGGAGGAAACTCTGATGCAGCGACGCCGCGTGAGGGAAGACGGTTTTCGGATTGTAAACCTCTGTCTTCAGGGACGAAATGAATGACGGTACCTGAGGAGGAAGCTCCGGCTAACTACGTGCCAGCAGCCGCGGTAATACGTAGGGAGCAAGCGTTGTCCGGAATTACTGGGTGTAAAGGGAGCGTAGGCGGGAATGCAAGTTGAATGTCAAATCTACCGGCTTAACTGGTAGCCGCGTTCAAAACTGCGTTTCTTGAGTGAAGTAGAGGCAGGCGGAATTCCTAGTGTAGCGGTGAAATGCGTAGATATTAGGAGGAACACCAGTGGCGAAGGCGGCCTGCTGGGCTTTTACTGACGCTGAGGC…	>denovo17572	Bacteria;Firmicutes;Clostridia;Clostridiales;Ruminococcaceae;Hydrogenoanaerobacterium	0.20105		0.00890809	0.00834237	0.0100588		0.00615441	0.0617284								0.00274228	0.00731475		0.00286993		0.0100499			0.0852697	0.0505276			0.00142108			0.0934183	0.0643915	0.170188											0.0120592	0.00396244		0.0234951
CCTACGGGAGGCTGCAGTGGGGGATATTGCACAATGGGCGCAAGCCTGATGCAGCGACGCCGCGTGAGGGAAGACGGTCTTCGGATTGTAAACCTCTGTCTTCGGGGACGATAATGACGGTACCCGAGGAGGAAGCCACGGCTAACTACGTGCCAGCAGCCGCGGTAATACGTAGGTGGCGAGCGTTGTCCGGAATTACTGGGTGTAAAGGGAGCGTAGACGGTGAAGCAAGTCTGGAGTGAAAACCCGGGGCTTAACCCCGGGATTGCTTTGGAAACTGTTTAACTGGAGTGCAGGAGAGGTAAGCGGAATTCCTAGTGTAGCGGTGAAATGCGTAGATATTAGGAGGAACACCAGTGGCGAAGGCGGCTTACTGGACTGTAACTGACGTTGAGGCTC…	>denovo100427	Bacteria;Firmicutes;Clostridia;Clostridiales	0.200825															0.00274228								0.0548162	0.00297221			0.0312638	0.00127805				0.0064222										0.00523387		0.0435868		0.117476
CCTACGGGAGGCTGCAGTGGGGAATATTGCACAATGGGGGAAACCCTGATGCAGCGACGCCGCGTGAGCGAAGAAGTATTTCGGTATGTAAAGCTCTATCAGCAGGGAAGAAACTGACGGTACCTGACTAAGAAGCACCGGCTAAATACGTGCCAGCAGCCGCGGTAATACGTATGGTGCAAGCGTTATCCGGATTTACTGGGTGTAAAGGGAGCGCAGGCGGGAGAGCAAGTCAGCTGTGAAAACCACGGGCTTAACCTGTGGACTGCAGTTGAAACTGTTCTTCTTGAGTGAAGTAGAGGTAAGCGGAATTCCGAGTGTAGCGGTGAAATGCGTAGAGATTCGGAGGAACACCAGTGGCGAAGGCGGCTTACTGGGCTTTAACTGACGCTGAGGCTC…	>denovo69712	Bacteria;Firmicutes;Clostridia;Clostridiales;Lachnospiraceae	0.20078		0.0311783	0.00834237	0.0201177		0.00307721		0.00907688		0.0041731	0.00426773	0.00436313		0.00481						0.00334997				0.00297221		0.026255	0.0497378	0.0408977		0.00566171	0.00201223	0.0288999		0.00338662	0.00229484			0.00337615				0.00348924		0.00396244
CCTACGGGTGGCTGCAGTGGGGAATATTGCTCAATGGGCGGAAGCCTGATGCAGCGACGCCGCGTGAGTGAAGAAGTATCTCGGTGTGTAAAGCTCTATCAGCAGGGAAGAAAATGACGGTACCTGACTAAGAAGCCCCGGCTAACTACGTGCCAGCAGCCGCGGTAATACGTAGGGGGCAAGCGTTATCCGGATTTACTGGGTGTAAAGGGAGCGTAGACGGTTAAGCAAGTCTGGAGTGAAAACCCGGGGCTTAACCCCGGGATTGCTTTGGAAACTGTTTAACTGGAGTGCAGGAGAGGTAAGCGGAATTCCTAGTGTAGCGGTGAAATGCGTAGATATTAGGGGGAACACCAGTGGCGAAGGCGGCTTACTGGACTGTAACTGACGTTGAGGCTC…	>denovo97055	Bacteria;Firmicutes;Clostridia;Clostridiales;Lachnospiraceae;Clostridium XlVa	0.200776						0.00307721		0.00907688		0.00208655		0.00145438				0.00365738		0.00286993	0.00410931				0.00304535					0.00127805				0.0032111										0.00523387	0.0120592	0.0118873		0.00469903
CCTACGGGGGGCTGCAGTAGGGAATATTGCACAATGGGGGAAACCCTGATGCAGCGACGCCGCGTGAGCGAAGAAGTATCTCGGTATGTAAAGCTCTATCAGCAGGGAAGAAGATGACGGTACCTGACTAAGAAGCACCGGCTAAATACGTGCCAGCAGCCGCGGTAATACGTATGGTGCAAGCGTTATCCGGATTTACTGGGTGTAAAGGGAGCGTAGACGGAAGAGCAAGTCTGGAGTGAAAGCCCGGGGCGCAACCCCGGGACTGCTTTGGAAACTGTTTATCTAGAGTGCCGGGGAGGCAAGCGGAATTCCTAGGGTGGCGGTGAAATGCGTAGATATTAGGAGGAACACCAGTGGCGAAGGCGGCTTGCTGGACGGTAACTGACGTTGAGGCTC…	>denovo47659	Bacteria;Firmicutes;Clostridia;Clostridiales;Lachnospiraceae	0.200658			0.00278079			0.00307721												0.00286993	0.00410931	0.00334997
CCTACGGGAGGCTGCAGTGGGGAATATTGGGCAATGGGCGCAAGCCTGACCCAGCAACGCCGCGTGAAGGAAGAAGGCCCTCGGGTTGTAAACTTCTTTTGTCAGGGACGAAGCAAGTGACGGTACCTGACGAATAAGCCACGGCTAACTACGTGCCAGCAGCCGCGGTAAAACGTAGGTCACGAGCGTTGTCCGGAATTACTGGGTGTAAAGGGAGCGCAGGCGGGTATGCAAGTTGGGAGTGAAATACATGGGCTCAACCCATGAACTGCTCTCAAAACTGTGTATCTTGAGTAGTGCAGAGGTAGGCGGAATTCCCGGTGTAGCGGTGGAATGCGTAGATATCGGGAGGAACACCAGTGGCGAAGGCGGCCTACTGGGCACCAACTGACGCTGAGG…	>denovo129439	Bacteria;Firmicutes;Clostridia;Clostridiales;Ruminococcaceae;Faecalibacterium	0.200571		0.0445405	0.066739	0.0502942		0.0769302	0.0771605	0.163384		0.00208655	0.00142258							0.00286993	0.0328745	0.00669994				0.0014861						0.00566171	0.00804894			0.00225774		0.00197297		0.00337615	0.00209608	0.00242657		0.00872311	0.00482369	0.00396244
CCTACGGGTGGCTGCAGTGGGGGATATTGCACAATGGGGGAAACCCTGATGCAGCGACGCCGCGTGAGTGAAGAAGTATTTCGGTATGTAAAGCTCTATCGGCAGGGAAGAGAATGACGGTACCTGAGTAAGAAGCCCCGGCTAACTACGTGCCAGCAGCCGCGGTAATACGTAGGGGGCAAGCGTTATCCGGCTTTACTGGGTGTAAAGGGAGCGTAGACGGCAAAGCAAGTCTGATGTGAAAGCCCGGGGCTCAACCCCGGGACTGCTTTGGAAACTGTTCTGCGAGAGTGCTGGAGAGGTAAGCGAAATTCCTAGTGTAGCGGTGAAATGCGTAGATATTAGGAGAAACACCAGTGGCGAAGGCGGCTTACTGGACAGTAACTGACGTTGAGGCTC…	>denovo136137	Bacteria;Firmicutes;Clostridia;Clostridiales;Lachnospiraceae;Ruminococcus2	0.199726		0.00445405	0.0194655			0.0184632	0.00771605	0.00907688		0.0271252	0.00569031	0.0130894			0.00548456	0.00731475		0.0258294		0.00669994		0.0303882	0.0822243			0.047259	0.018474	0.0127805				0.0353221		0.00451549	0.0206536	0.0197297		0.00168808		0.00363985		0.00174462	0.00482369	0.0158497		0.00469903
CCTACGGGGGGCTGCAGTGAGGAATATTGGTCAATGGGCGCAGGCCTGAACCAGCCAAGTAGCGTGAAGGATGACTGCCCTATGGGTTGTAAACTTCTTTTATATGGGAATAAAGTTTTCCACGTGTGGAATTTTGTATGTACCATATGAATAAGGATCGGCTAACTCCGTGCCAGCAGCCGCGGTAATACGGAGGATCCGAGCGTTATCCGGATTTATTGGGTTTAAAGGGAGCGTAGGTTGATTGTTAAGTCAGTTGTGAAAGTTTGCGGCTCAACCGTAAAAGTGCAGTTGAACATGGCAGTTTTGAGTACAGTAGAGGTGGGCGGAATTCGTGGTGTAGCGGTGAAATGATTAGATATCACGAAGAACTCCGATTGCGAAGGCAGCTCACTAGAC…	>denovo115692	Bacteria;Bacteroidetes;Bacteroidia;Bacteroidales;Bacteroidaceae;Bacteroides	0.198516
CCTAGGGGGGCAGCAGTGGGGAATATTGCACAATGGGGGAAACCCTGATGCAGCGACGCCGCGTGAGTGAAGAAGTATTTCGGTATGTAAAGCTCTATCAGCAGGGAAGAAAATGACGGTACCTGACTAAGAAGCCCCGGCTAACTACGTGCCAGCAGCCGCGGTAATACGTAGGGGGCAAGCGTTATCCGGATTTACTGGGTGTAAAGGGAGCGTAGACGGCGCGGCAAGTCTGAAGTGAAAGCCCGGGGCTTAACCCCGGGACTGCTTTGGAAACTGCCATGCTGGAGTGCTGGAGAGGTAAGTGGAATTCCTAGTGTAGCGGTGAAATGCGTAGATATTAGGAGGAACACCAGTGGCGAAGGCGGTCTGCTGGACAGCAACGGACGCTGAGGCGCG…	>denovo43873	Bacteria;Firmicutes;Clostridia;Clostridiales;Lachnospiraceae	0.19801		0.00445405	0.0111232	0.0100588		0.0523125	0.115741	0.0181538			0.00142258	0.00145438			0.00822684	0.00731475			0.00821862					0.00297221						0.00566171	0.0100612	0.00963329										0.00872311				0.0281942
CCTCGGGGGGCTGCAGTGGGGAATATTGCACAATGGGGGAAACCCTGATGCAGCGACGCCGCGTGAGTGAAGAAGTATTTCGGTATGTAAAGCTCTATCAGCAGGGAAGAAAATGACGGTACCTGACTAAGAAGCCCCGGCTAACTACGTGCCAGCAGCCGCGGTAATACGTAGGGGGCAAGCGTTATCCGGATTTACTGGGTGTAAAGGGAGCGTAGACGGCGAAGCAAGTCTGAAGTGAAAACCCAGGGCTCAACCCTGGGACTGCTTTGGAAACTGTCCGTCTTGAGTGCCGGAGAGGTAAGCGGAATTCCTAGTGTAGCGGTGAAATGCGTAGATATTAGGAGGAACACCAGTGGCGAAGGCGGCTTACTGGACGGTAACTGACGTTGAGGCTCG…	>denovo112582	Bacteria;Firmicutes;Clostridia;Clostridiales;Lachnospiraceae;Clostridium XlVa	0.197949			0.00834237			0.0123088		0.0272306		0.0146059	0.0227612	0.02327		0.0481	0.0274228	0.0256016		0.00573987	0.00821862	0.00334997		0.0151941	0.0182721	0.00594442		0.015753	0.0198951	0.0178927		0.00566171	0.0060367	0.0032111		0.00451549	0.00917936	0.0157838		0.0135046	0.00838434	0.00970626		0.00697849	0.0168829	0.0118873
CCTACGGGTGGCAGCAGTGGGGAATATTGCACAATGGGGGAAACCCTGATGCAGCGACGCCGCGTGAGGGAAGAAGGTTTTCGGATTGTAAACCTCTGTCTTTGGTGACGATAATGACGGTAACCAAAGAGGAAGCTACGGCTAACTACGTGCCAGCAGCCGCGGTAATACGTAGGGAGCAAGCGTTGTCCGGATTTACTGGGTGTAAAGGGTGCGTAGGCGGTTTGGTAAGTCAGAAGTGAAATCCATGGGCTTAACCCATGAACTGCTTTTGAAACTATCGAACTTGAGTGAAGTAGAGGTAGGCGGAATTCCCGGTGTAGCGGTGAAATGCGTAGAGATCGGGAGGAACACCAGTGGCGAAGGCGGCCTACTGGGCTTTAACTGACGCTGAGGCAC…	>denovo48350	Bacteria;Firmicutes;Clostridia;Clostridiales;Ruminococcaceae;Clostridium IV	0.197645		0.0200432	0.00556158	0.0251471		0.00615441		0.00907688						0.00481				0.00286993					0.00304535			0.026255	0.0298427	0.0140586		0.00849257		0.0032111										0.013957	0.00482369	0.00792487		0.00469903
CCTACGGGTGGCAGCAGTGGGGAATATTGCACAATGGGGGAAACCCTGATGCAGCGACGCCGCGTGAGCGAAGAAGTATTTCGGTATGTAAAGCTCTATCAGCAGGGAAGAAACTGACGGTACCTGACTAAGAAGCACCGGCTAAATACGTGCCAGCAGCCGCGGTAATACGTATGGTGCAAGCGTTATCCGGATTTACTGGGTGTAAAGGGAGCGTAGACGGAGCAGCAAGTCTGGAGTGAAAACCCGGGGCTCAACCCCGGGACTGCTTTGGAAACTGTTGTTCTAGAGTGCTGGAGAGGTAAGTAGAATTCCTAGTGTAGCGGTGAAATGCGTAGATATTAGGAGGAACACCAGTGGCGAAGGAGGGTTGCTGGACTGTAGCTGACGTTGAGGCTC…	>denovo119484	Bacteria;Firmicutes;Clostridia;Clostridiales;Lachnospiraceae;Ruminococcus2	0.196707		0.00445405	0.00278079	0.00502942		0.00307721				0.0146059	0.0270289	0.0261788		0.01924	0.0164537	0.0658328						0.00759705	0.00609069				0.0241584	0.0408977			0.00201223	0.0064222		0.0214486	0.0114742	0.0177567		0.0101285	0.0167687	0.00121328						0.0328932
CCTACGGGAGGCTGCAGTGGGGAATATTGCACAATGGGGGGAACCCTGATGCAGCGACGCCGCGTGAGGGAAGGAGGTTTTCGGTATGTAAAGCTCTATCAGCAGGGAAGAAACTGACGGTACCTGACTAAGAAGCACCGGCTAAATACGTGCCAGCAGCCGCGGTAATACGTATGGTGCAAGCGTTATCCGGATTTACTGGGTGTAAAGGGAGCGTAGACGGAGCAGCAAGTCTGGAGTGAAAACCCGGGGCTCAACCCCGGGACTGCTTTGGAAACTGTTGTTCTAGAGTGCTGGAGAGGTAAGTGGAATTCCTAGTGTAGCGGTGAAATGTGTAGATATTAGGAGGAACACCAGTGGCGAAGGCGGCTTACTGGACAGTAACTGACGTTGAGGCTC…	>denovo36672	Bacteria;Firmicutes;Clostridia;Clostridiales;Lachnospiraceae;Ruminococcus2	0.196707		0.00222702								0.00625965	0.0241838	0.00290875		0.01443	0.00274228	0.0475459							0.00913604			0.010502	0.00852648	0.0140586		0.00849257		0.0032111		0.0079021	0.00458968	0.00986485		0.00506423	0.00628825							0.00939805
CCTACGGGGGGCTGCAGTGAGGAATATTGGTCAATGGTCGGCAGACTGAACCAGCCAAGTCGCGTGAAGGAAGACGGCCCTAAGGGTTGTAAACTTCTTTTGTCGGAGAGTAAAGGTCTTCACGAGTGGAGATTTGCAAGTATCCGAAGAAAAAGCATCGGCTAACTCCGTGCCAGCAGCCGCGGTAATACGGAGGATGCGAGCGTTATCCGGATTTATTGGGTTTAAAGGGTGCGTAGGCGGCATGACAAGTCAGCGGTGAAATGCCCGGGCTTAACCCGGGAGCTGCCGTTGAAACTGTCGAGCTAGCGTGCACAAGAGGTAGGCGGAATGCGTGGTGTAGCGGTGAAATGCATAGATATCACGCAGAACCCCGATTGCGAAGGCAGCCTGCCAAGC…	>denovo28396	Bacteria;Bacteroidetes;Bacteroidia;Bacteroidales;Porphyromonadaceae;Barnesiella	0.195339																																		0.00338662		0.00394594		0.177248	0.169783	0.195339
CCTCGGGTGGCAGCAGTGGGGAATATTGCACAATGGGGGAAACCCTGATGCAGCGACGCCGCGTGAAGGAAGAAGTATCTCGGTATGTAAACTTCTATCAGCAGGGAAGAAAATGACGGTACCTGACTAAGAAGCCCCGGCTAACTACGTGCCAGCAGCCGCGGTAATACGTAGGGGGCAAGCGTTATCCGGATTTACTGGGTGTAAAGGGAGCGTAGACGGAAGGGCAAGTCTGGAGTGAAAGCCCGGGGCTCAACCCCGGGACTGCTTTGGAAACTGTCCGTCTTGAGTGCTGGAGAGGTAAGCGGAATTCCTAGTGTAGCGGTGAAATGCGTAGATATTGGGAAGAACACCAGTGGCGAAGGCGGCTTTCTGGACTGTAACTGACGCTGAGGCTCG…	>denovo55254	Bacteria;Firmicutes;Clostridia;Clostridiales;Lachnospiraceae	0.194772															0.00548456	0.0109721
CCTACGGGGGGCAGCAGTGGGGAATATTGGGCAATGGGCGCAAGCCTGACCCAGCAACGCCGCGTGAAGGAAGAAGGCCCTCGGGTTGTAAACTTCTTTTGTCAGGGACGAAGTAAGTGACGGTACCTGTTGAATAAGCCACGGCTAACTACGTGCCAGCAGCCGCGGTAATACGTAGGTGGCAAGCGTTATCCGGATTTACTGGGTGTAAAGGGCGTGTAGGCGGGATGGCAAGTCAGATGTGAAAACCACGGGCTCAACCTGTGGCCTGCACTGGAAACTGCTGTTCTGGAGGGATGGAGAGGCAGGCGGAATTCCGTGTGTAGCGGTGAAATGCGTAGATATACGGAGGAACACCAGTGGCGAAGGCGGCCTGCTGGACATTAACTGACGCTGAGG…	>denovo38387	Bacteria;Firmicutes;Clostridia;Clostridiales;Ruminococcaceae;Pseudoflavonifractor	0.194063		0.0289513	0.0222463	0.0402354		0.129243	0.0771605									0.00731475			0.00410931					0.00445831																		0.0244247	0.00964739	0.00396244		0.00469903
CCTACGGGCGGCAGCAGTGGGGAATATTGCACAATGGGGGAAACCCTGATGCAGCGACGCCGCGTGAAGGAAGAAGTATCTCGGTATGTAAACTTCTATCAGCAGGGAAGAAAATGACGGTACCTGACTAAGAAGCCCCGGCTAACTACGTGCCAGCAGCCGCGGTAATACGTAGGGGGCAAGCGTTATCCGGATTTACTGGGTGTAAAGGGTGCGTAGGCGGCAGAGCAAGTCAGATGTGAAAGACCGGGGCTCAACCCCGGGGCTGCATTTGAAACTGTTTTGCTGGAGTCCGGGAGAGGCAGGCGGAATTCCTAGTGTAGCGGTGAAATGCGTAGATATTAGGAGGAACACCAGTGGCGAAGGCGGCCTGCTGGACCGGAACTGACGCTGAGGCAC…	>denovo126793	Bacteria;Firmicutes;Clostridia;Clostridiales;Lachnospiraceae	0.19403						0.00615441	0.00771605	0.0181538		0.018779	0.00142258	0.011635		0.00962001	0.019196	0.0621754		0.00286993		0.00669994			0.00304535											0.00338662					0.00209608			0.00174462		0.00396244
CCTACGGGCGGCTGCAGTGGGGAATATTGGGCAATGGGCGCAAGCCTGACCCAGCAACGCCGCGTGAAGGAAGAAGGCCCTCGGGTTGTAAACTTCTTTTGTCAGGGACGAAGCAAGTGACGGTACCTGACGAATAAGCCACGGCTAACTACGTGCCAGCAGCCGCGGTAATACGTAGGTGGCAAGCGTTATCCGGATTTACTGGGTGTAAAGGGAGCGTAGACGGATGTGCAAGTCTGGAGTGAAAACCCGGGGCTCAACCCCGGGACTGCTTTGGAAACTGTATATCTTGAGTGCTGGAGAGGTAAGTGGAATTCCTAGTGTAGCGGTGAAATGCGTAGATATTAGGAGGAACACCAGTGGCGAAGGCGGCTTACTGGACAGTAACTGACGTTGAGG…	>denovo124211	Bacteria;Firmicutes;Clostridia;Clostridiales;Lachnospiraceae	0.193702		0.00445405		0.0251471		0.0584669	0.0308642	0.00907688			0.00142258	0.00145438		0.14911	0.0219382	0.0950918			0.0246558	0.00669994		0.00759705	0.0487255	0.014861		0.120773	0.0795805	0.0460099		0.0226469	0.00402447	0.0353221		0.00903098	0.00229484			0.0101285		0.00970626		0.00348924	0.0144711			0.0281942
TCCTACGGGCGGCAGCAGTGGGGAATATTGCACAATGGGGGAAACCCTGATGCAGCGACGCCGCGTGAAGGAAGAAGTATCTCGGTATGTAAACTTCTATCAGCAGGGAAGAAAATGACGGTACCTGACTAAGAAGCCCCGGCTAACTACGTGCCAGCAGCCGCGGTAATACGTAGGGGGCAAGCGTTATCCGGATTTACTGGGTGTAAAGGGAGCGTAGACGGAAGGGCACGTCTGGAGTGAAAGCCCGGGGCTTAACCCCGGGACGGCTTTGGAAACTGCCATGCTGGAGTGCTGGAGAGGTAAGTGGAATTCCTAGGGTAGCGGTGAAATGCGTAGATATTAGGAGGAACACCAGTGGCGAAGGCGGCTTACTGGACAGTAACCGACGTTGAGGCT…	>denovo72671	Bacteria;Firmicutes;Clostridia;Clostridiales;Lachnospiraceae	0.192901						0.0523125	0.192901	0.0544613							0.00822684	0.0146295				0.00334997				0.0014861						0.0113234	0.00804894	0.0032111
CCTACGGGTGGCTGCAGTGGGGGATATTGCACAATGGGGGGAACCCTGATGCAGCGACGCCGCGTGAGGGAAGACGGTCTTCGGATTGTAAACCCCTGTCATGTGGGAGCAAATTAAAAAGATAGTACCACAAGAGGAAGAGACGGCTAACTCTGTGCCAGCAGCCGCGGTAATACAGAGGTCTCAAGCGTTGTTCGGAATCACTGGGCGTAAAGCGTGCGTAGGCTGTTTCGTAAGTCGTGTGTGAAAGGCGCGGGCTCAACCCGCGGACGGCACATGATACTGCGAGACTAGAGTAATGGAGGGGGAACCGGAATTCTCGGTGTAGCAGTGAAATGCGTAGATATCGAGAGGAACACTCGTGGCGAAGGCGGGTTCCTGGACATTAACTGACGCTGA…	>denovo18869	Bacteria;Verrucomicrobia;Verrucomicrobiae;Verrucomicrobiales;Verrucomicrobiaceae;Akkermansia	0.192689																											0.0298427	0.0306733
CCTACGGGGGGCAGCAGTGGGGAATATTGCACAATGGGGGAAACCCTGATGCAGCAACGCCGCGTGAAGGATGACGGTTTTCGGATTGTAAACTTCTGTTCTCGTTGACGAAGACAGTGACGGTAAACGAGGAGCAAGCCACGGCTAACTACGTGCCAGCAGCCGCGGTGATACGTAGGTGGCAAGCGTTGTCCGGAATTACTGGGTGTAAAGGGAGCGCAGGCGGGAGAGCAAGTCAGCTGTGAAAACCACGGGCTTAACCTGTGGACTGCAGTTGAAACTGCAGTTCTTGAGTACTGGAGAGGCAGACGGAATTCCTAGTGTAGCGGTGAAATGCGTAGATATTAGGAGGAACACCAGTGGCGAAGGCGGTCTGCTGGACAGCAACTGACGCTGAGG…	>denovo87142	Bacteria;Firmicutes;Clostridia;Clostridiales;Ruminococcaceae	0.192034		0.0178162	0.00834237	0.00502942								0.00145438			0.00274228											0.005251	0.0440535	0.048566				0.0192666			0.00229484	0.00197297		0.00506423
CCTACGGGGGGCAGCAGTGGGGAATATTGCACAATGGGGGAAACCCTGATGCAGCGACGCCGCGTGAGGGAAGAAGGTTTTCGGATTGTAAACCTCTGTCTTTGGTGACGATAATGACGGTAACCAAAGAGGAAGCTACGGCTAACTACGTGCCAGCAGCCGCGGTAATACGTAGGTGGCAAGCGTTGTCCGGATTTATTGGGCGTAAAGCGAGCGCAGGCGGAAGAATAAGTCTGATGTGAAAGCCCTCGGCTTAACCGAGGAACTGCATCGGAAACTGTTTTTCTTGAGTGCAGAAGAGGAGAGTGGAACTCCATGTGTAGCGGTGGAATGCGTAGATATATGGAAGAACACCAGTGGCGAAGGCGGCTCTCTGGTCTGCAACTGACGCTGAGGCTC…	>denovo925	Bacteria;Firmicutes;Bacilli;Lactobacillales;Lactobacillaceae;Paralactobacillus	0.191063		0.0178162	0.00278079	0.0201177		0.015386												0.00573987					0.00304535	0.0014861			0.00426324			0.00849257	0.00402447	0.0899107										0.00697849
CCTACGGGTGGCTGCAGTGGGGAATATTGCACAATGGGGGAAACCCTGATGCAGCGACGCCGCGTGAAGGAAGAAGTATCTCGGTATGTAAACTTCTATCAGCAGGGAAGAAAATGACGGTACCTGACTAAGAAGCCCCGGCTAACTACGTGCCAGCAGCCGCGGTAATACGTAGGGGGCAAGCGTTATCCGGATTTACTGGGTGTAAAGGGAGCGTAGACGGCGACGCAAGTCTGGAGTGAAAGCCCGGGGCCCAACCCCGGGACTGCTTTGGAAACTGTGTTGCTGGGGTGCAGGAGAGGTAAGTGGAATTCCTAGTGGAGCGGTGAAATGCGTAGATAGTAGGAGGAACACCAGTGGCGAAGGCGGCTTACTGGACTGTAACTGACGTTGAGGCTC…	>denovo45534	Bacteria;Firmicutes;Clostridia;Clostridiales;Lachnospiraceae;Clostridium XlVa	0.190854																						0.00759705								0.00283086	0.00201223	0.0032111				0.00394594
CCTACGGGTGGCTGCAGTGGGGGATATTGCACAATGGGGGAAACCCTGATGCAGCGACGCCGCGTGAGGGAAGAAGGTTTTCGGATTGTAAACCTCTGTCTTCAGTGACGAAATGAGACGGTAACTGAGGAGGAAGCCACGGCTAACTACGTGCCAGCAGCCGCGGTAATACGTAGGTGGCAAGCGTTGTCCGGAATTACTGGGTGTAAAGGGAGCGTAGGCGGGGAGACAAGTCGGGTGTTAAATCTATCGGCTCAACTGGTAGCAGCACTCGAAACTGTAACGCTTGAGTGAAGTAGAGGTAAGCGGAATTCCTAGTGTAGCGGTGAAAGGCGTAGATATTAGGAGGAACACCAGTGGCGAAGGCGGCTTGCTGGACAGTAACTGACGTTGAGGCTC…	>denovo16882	Bacteria;Firmicutes;Clostridia;Clostridiales;Ruminococcaceae	0.190787			0.00278079			0.190787	0.0385802	0.108923										0.0086098																								0.00174462		0.00396244		0.00939805
CCTACGGGGTGCAGCAGTGGGGAATATTGCACAATGGGGGAAACCCTGATGCAGCGACGCCGCGTGAGCGAAGAAGTATTTCGGTATGTAAAGCTCTATCAGCAGGGAAGAAACTGACGGTACCTGACTAAGAAGCACCGGCTAAATACGTGCCATCAGCCGCGGTAATACGTATGGTGCAAGCGTTATCCGGATTTACTGGGTGTAAAGTGAGCGTAGACGGAGCAGCCAGTCTGGAGTGAAAACCCGTGGCTCAACCCCGGGACTGCTTGGGAAACTGTTGTTCTAGAGTGCTGGAGAGGTAAGTGGAATTCCTAGTGTAGCGGTGAAATGCGTAGATATTAGGAGGAACACCAGTGGCGAAGGCGGCTTACTGGACAGTAACTGACGTTGAGGCTC…	>denovo25270	Bacteria;Firmicutes;Clostridia;Clostridiales;Lachnospiraceae;Ruminococcus2	0.190304														0.00481		0.00365738											0.00142108	0.00127805				0.0032111		0.00112887		0.00197297										0.00469903
CCTACGGGTGGCTGCAGTGGGGAATATTGCACAATGGGGGAAACCCTGATGCAGCGACGCCGCGTGAGCGAAGAAGTATTTCGGTATGTAAAGCTCTATCAGCAGGGAAGAAACTGACGGTACCTGACTAAGAAGCACCGGCTAAATACGTGCCAGCAGCCGCGGTAATACGTATGGTGCAAGCGTTATCCGGATTTACTGTGTGTACAGGGAGCGTAGACGGAGCAGCCAGTCTGAAGTGAAAACCCGGGGCTAAAACCCTGGACTGCTTTGGAAACTGTTGTTCTAGAGTGCTGGAGAGGTAAGTGGAATTCCTAGTGTAGCGGTGAAATGCGTAGATATTAGGAGGAACACCAGTGGCGAAGGCGGCTTACTGGACAGTAACTGACGTTGAGGCTC…	>denovo105326	Bacteria;Firmicutes;Clostridia;Clostridiales;Lachnospiraceae;Ruminococcus2	0.189307		0.00445405				0.00307721				0.0104328	0.00853546	0.0174525		0.01924	0.00822684	0.0621754						0.00759705	0.00913604	0.00297221		0.010502	0.0156319	0.0357855		0.00283086	0.00402447	0.0032111		0.0158042		0.0236756		0.00675231								0.0328932
CCTACGGGTGGCTGCAGTGGGGAATATTGCTCAATGGGGGAAACCCTGATGCAGCGACGCCGCGTGAGTGAAGAAGTATTTCGGTATGTAAAGCTCTATCAGCAGGGAAGAAAATGACGGTACCTGACTAAGAAGCACCGGCTAAATACGTGCAAGCAGCCGCGGTAATACGTATGGTGCAAGCGTTATCCGGATTTACTGGGTGTAAAGGGAGCGTAGACGGAGAAGCAAGTCTGGAGTGAAAACCCGGGGCTCAACCCCGGGACTGCTTTGGAAACTGGTTTTCTAGAGTGCCGGAGAGGTAAGCGGAATTCCTAGTGTAGCTGTGAAATGCGTAGATAGTAGGAGGAACACCAGTGGCGAAGGCGGCTTACTGGACGGTAACTGACGTTGAGGCTC…	>denovo7139	Bacteria;Firmicutes;Clostridia;Clostridiales;Lachnospiraceae;Ruminococcus2	0.188352		0.106897	0.100108	0.0402354		0.0184632	0.0308642	0.0181538		0.00625965	0.00142258	0.00727188		0.00481	0.00274228	0.0109721		0.0229595	0.0493117	0.0200998		0.00759705	0.00609069	0.00297221		0.005251	0.00142108	0.00127805						0.00112887	0.00229484	0.00591891		0.00337615	0.00209608			0.0296586	0.0168829	0.063399		0.00469903
CCTACGGGAGGCTGCAGTGAGGAATATTGGTCAATGGGCGTAAGCCTGAACCAGCCAAGTCGCGTGAGGGATGAAGGTTCTATGGATCGTAAACCTCTTTTATAAGGGAATAAAGTGCGGGACGTGTCCCGTTTTGTATGTACCTTATGAATAAGGATCGGCTAACTCCGTGCCAGCAGCCGCGGTAATACGGAGGATCCGAGCGTTATCCGGATTTATTGGGTTTAAAGGGTGCGTAGGCGGCCTTTTAAGTCAGCGGTGAAAGTCTGTGGCTCAACCATAGAATTGCCGTTGAAACTGGGAGGCTTGAGTATGTTTGAGGCAGGCGGAATGCGTGGTGTAGCGGTGAAATGCTTAGATATCACGAAGAACTCCGATTGCGAAGGCAGCTCACTAGAC…	>denovo863	Bacteria;Bacteroidetes;Bacteroidia;Bacteroidales;Porphyromonadaceae;Parabacteroides	0.188239
CCTACGGGTGGCTGCAGTGAGGAATATTGGTCAATGGCCGTGAGGCTGAACCAGCCAAGTAGCGTGAAGGATGACGGCCCTACGGGTTGTAAACTTCTTTTATGCGGGATTAACGTGAGGTACGTGTACCTTATTGCAGGTACCGCATGAATAAGCATCGGCTAACTCCGTGCCAGCAGCCGCGGTAATACGGAGGATGCAGGCGTTATCCGGATTTATTGGGTTTAAAGGGAGCGCAGACGGCATGTCAAGTCAGCTGTGAAAGTTCGGGGCTCAACCTGGGAACTGCATCTGATACTGGCAAGCTTGAGTCTCGTAGAGGGGGGTAGAATTCCAGGTGTAGCGGTGAAATGCGTAGAGATCTGGAGGAATACCGGTGGCGAAGGCGGCCCCCTGGAC…	>denovo14163	Bacteria;Proteobacteria;Gammaproteobacteria	0.188048
CCTACGGGGGGCTGCAGTGGGGAATATTGCACAATGGGGGAAACCCTGATGCAGCGACGCCGCGTGAGTGAAGAAGTATTTCGGTATGTAAAGCTCTATCAGCAGGGAAGAAGGTGACGGTACCTGAGTAAGAAGCCCCGGCTAACAACGTGCCAGCAGCCGCGGTAATACGTAGGGGGCAAGCGTTATCCGGATTTACTGGGTGGAAAGGGAGCGTAGACGGAAGGGCAAGTTTGGAGTGAAAGCCCGGGGCTCAACCCCGGGACTGCTTTGGAAACTGTCCGTCTTGAGTGCCGGAGAGGTAAGCGGAATTCCTAGGGTAGCGGTGAAATGCGTAGATATTAGGAGGAACACCAGTGGCGAAGGCGGCTTACTGGACGGTAACTGACGTTGAGGCTC…	>denovo32332	Bacteria;Firmicutes;Clostridia;Clostridiales;Lachnospiraceae	0.187391			0.00834237	0.00502942							0.00284515			0.00481				0.0315693	0.0123279	0.00334997		0.0151941	0.0243628	0.0118888		0.015753	0.00142108	0.00255611			0.026159			0.00112887	0.00458968			0.00675231	0.0104804			0.0104677	0.0168829	0.0158497		0.0187961
CCTACGGGTGGCTGCAGTGGGGGATATTGCACAATGGGCGCAAGCCTGATGCAGCGACGCCGCGTGAGGGAAGACGGTCTTCGGATTGTAAACCTCTGTCTTCGGGGACGATAATGACGGTACCCGAGGAGGAAGCCACGGCTAACTACGTGCCAGCAGCCGCGGTAATACGTAGGTGGCGAGCGTTGTCCGGAATTACTGGGTGTAAAGGGAGCGTAGGCGGGAAGACAAGTTGGACGTTAAATTTATCGGCTTAACCGGTAACCGCGTTCAAAACTGTTTTTCTTGAGTGAAGTAGAGGTTGGCGGAATTCCTAGTGTAGCGGTGAAATGCGTAGATATTAGGAGGAACACCAGTGGCGAAAGCGGCTTTCTGGACGACAACTGACGCTGAGGCGCG…	>denovo132431	Bacteria;Firmicutes;Clostridia;Clostridiales;Ruminococcaceae;Acetanaerobacterium	0.187293																																0.00963329
CCTACGGGTGGCAGCAGTGGGGAATATTGCACAATGGGGGAAACCCTGATGCAGCAACGCCGCGTGAAGGAAGACGGTTTTCGGATTGTAAACTTCTATCAATAGGGAAGAAAGAAATGACGGTACCTAAATAAGAAGCCCCGGCTAACTACGTGCCAGCAGCCGCGGTAATACGTAGGGGGCAAGCGTTATCCGGATTTACTGGGTGTAAAGGGAGCGTAGACGGCAAGGCAAGTCTGAAGTGAAAGCCCGGGGCTTAACCGCGGGACTGCTTTGGAAACTGTCTGGCTGGAGTGCCGGAGAGGTAAGCGGAATTCCTAGTGTAGCGGTGAAATGCGTAGATATTAGGAGGAACACCAGTGGCGAAGGCGGCTTACTGGACGGTAACTGACGTTGAGG…	>denovo44522	Bacteria;Firmicutes;Clostridia;Clostridiales;Lachnospiraceae	0.186254			0.00278079					0.00907688		0.0083462	0.00142258	0.0319963											0.0121814					0.00383416		0.00283086	0.00201223			0.0079021	0.00458968	0.00197297		0.00675231	0.00209608	0.00242657
CCTACGGGAGGCAGCAGTGGGGAATATTGCACAATGGGGGAAACCCTGATGCAGCGACGCCGCGTGAGTGAAGAAGTATTTCGGTATGTAAAGCTCTATCAGCAGGGAAGAAAATGACGGTACCTGACTAAGAAGCCCCGGCTAACTACGTGCCAGCAGCCGCGGTAATACGTAGGGGGCAAGCGTTATCCGGATTTACTGGGTGTAAAGGGAGCGTAGACGGCAAGGCAAGTCTGAAGTGAAAGCCCGGGGCTTAACCGCGGGACTGCTTTGGAAACTGTCTGGCTGGAGTGCCGGAGAGGTAAGCGGAATTCCTAGTGTAGCGGTGAAATGCGTAGAGATCGGGAGGAACACCAGTGGCGAAGGCGGCCTGCTGGGCCTTAACTGACGCTGAGGCAC…	>denovo126482	Bacteria;Firmicutes;Clostridia;Clostridiales;Lachnospiraceae	0.185923		0.0111351	0.00556158	0.0100588		0.00923162	0.0462963	0.0272306		0.00208655	0.00142258	0.0174525		0.01924	0.0438765	0.00365738						0.0227912	0.0304535	0.0104027		0.005251	0.0113686	0.0460099		0.00849257	0.00402447	0.0288999		0.00451549	0.00458968	0.00394594		0.00844039	0.00628825			0.00174462	0.00482369	0.0237746		0.0140971
CCTACGGGGGGCTGCAGTGGGGGATATTGCACAATGGGGGGAACCCTGATGCAGCGACGCCGCGTGAGGGAAGACGGTCTTCGGATTGTAAACCTCTGTCTTTAGGGACGAAAAAATGACGGTACCTAAGGAGGAAGCCACGGCTAACTACGTGCCAGCAGCCGCGGTAATACGTATGGTGCAAGCGTTATCCGGATTTACTGGGTGTAAAGGGAGCGTAGACGGAGCAGCAAGTCTGGAGTGAAAACCCGGGGCTCAACCCCGGGACTGCTTTGGAAACTGTTGTTCTAGAGTGCTGGAGAGGTAAGTGGAATTCCTAGTGTAGCGGTGAAATGCGTAGATATTAGGAGGAACACCAGTGGCGAAGGCGGCTTACTGGACAGTAACTGACGTTGAGGC…	>denovo104166	Bacteria;Firmicutes;Clostridia;Clostridiales;Lachnospiraceae;Ruminococcus2	0.185613		0.0133621	0.00556158	0.00502942																			0.00609069			0.042008	0.018474	0.0524002
CCTACGGGGGGCTGCAGTGGGGAATATTGGGCAATGGGCGCAAGCCTGACCCAGCAACGCCGCGTGAAGGAAGAAGGCTTTCGGGTTGTAAACTTCTTTTGTCAGGGAACAGTAGACGAGGGTACCTGACGAATAAGCCACGGCTAACTACGTGCCAGCAGCCGCGGTAATACGTAGGTGGCAAGCGTTGTCCGGATTTACTGGGTGTAAAGGGCGTGCAGCCGGGCTGGTAAGTCAGATTTGAAATCCGTGGGCTTAACCCACGAACTGCATTTGAAACTGCTGTTCTTGAGTACCGGAGAGGGTATCGGAATTCCTTGGGTAGCGGTGAAATGCGTAGATATAAGGAAGAACACCAGGGGCGAAGGCGGATAACTGGACTGCAACTGACGGTGAGGC…	>denovo19553	Bacteria;Firmicutes;Clostridia;Clostridiales;Ruminococcaceae;Oscillibacter	0.185185		0.00222702	0.00278079	0.0150883		0.00307721	0.185185					0.00145438																														0.00523387
CCTACGGGGGGCTGCAGTGGGGAATATTGGGCAATGGGCGCAAGCCTGACCCAGCAACGCCGCGTGAAGGAAGAAGGCTTTCGGGTTGTAAACTTCTTTTGTCGGGGACGAAACAAATGACGGTACCTGACGAATAAGCCACGGCTAACTACGTGCCAGCAGCCGCGGTAATACGTAGGTGGCAAGCGTTATCCGGATTTACTGGGTGTAAAGGGCGTGCAGCCGGGCCGGCAAGTCAGATGTGAAATCTGGAGGCTTAACCTCCAAACTGCATTTGAAACTGTAGGTCTTGAGTACCGGAGAGGTTATCGGAATTCCTTGTGTAGCGGTGAAATGCGTAGATATAAGGAAGAACACCAGTGGCGAAGGCGGATAACTGGACGGCAACTGACGGTGAGG…	>denovo113343	Bacteria;Firmicutes;Clostridia;Clostridiales;Ruminococcaceae;Oscillibacter	0.184638		0.00222702	0.00834237	0.00502942		0.0615441	0.00771605	0.00907688		0.00208655				0.03367	0.00274228	0.0109721		0.00286993		0.00334997		0.0151941	0.0182721	0.00743052			0.115108	0.048566		0.00283086	0.0060367	0.0128444		0.00112887				0.00168808		0.00242657			0.00241185	0.00396244		0.00939805
CCTACGGGCGGCAGCAGTGGGGGATATTGCACAATGGGGGAAACCCTGATGCAGCGACGCCGCGTGAGGGAAGAAGGTTTTCGGATTGTAAACCTCTGTCTTCAGTGACGAAATGAGACGGTAACTGAGGAGGAAGCCACGGCTAACTACGTGCCAGCAGCCGCGGTAATACGTAGGTGGCAAGCGTTGTCCGGAATTACTGGGTGTAAAGGGCGTGTAGGCGGGATTGCAAGTCAGATGTGAAAACCACGGGCTCAACCTGTGGCCTGCATTTGAAACTGCAGTTCTTGAGTACTGGAGAGGCAGACGGAATTCCTAGTGTAGCGGTGAAATGCGTAGATATTAGGAGGAACACCAGTGGCGAAGGCGGTCTGCTGGACAGCAACTGACGCTGAGGCG…	>denovo29887	Bacteria;Firmicutes;Clostridia;Clostridiales;Ruminococcaceae;Clostridium IV	0.184632		0.00222702				0.184632	0.0617284	0.0453844											0.00410931	0.00334997																						0.00174462		0.00396244		0.00469903
CCTACGGGTGGCTGCAGTGGGGAATATTGCACAATGGGGGAAACCCTGATGCAGCGACGCCGCGTGAGCGACGAAGTATTTCGGTATGTAAAGCTCTATCAGCAGGGAAGAAAATGACGGTACCTGACTAAGAAGCACCGGCTAAATACGTGCCAGCAGCCGCGGTAATACGTATGGTGCAAGCGTTATCCGGATTTACTGGGTGTAAAGGGAGCGTAGACGGATGGGCAAGTCTGAAGTGAAAGCCCGGGGCTCAACCCCGGGACTGCTATGGAAACTGTGCATCTGGAGTGCTGGAGAGGTAATGGGAATTCCTAGTGTAGCGGTGAAATGCGTAGATAGTAGGAGGAACACCAGTGGCGAAGGCGGCTTACTGGACAGCAACTGACGTTGAGGCTC…	>denovo43472	Bacteria;Firmicutes;Clostridia;Clostridiales;Lachnospiraceae;Ruminococcus2	0.184275										0.0125193	0.00142258					0.0109721							0.00609069																			0.00174462
CCTACGGGGGGCTGCAGTGGTGAATATTGCACAATGGGGGAAACCCTGATGCAGCGACGCCGCGTGAGCGAAGAAGTATTTCGGTATGTAAAGCTCTATCAGCAGGGAAGAAACTGACGGTACCTGACTAAGAAGCACCGGCTAAATACGTGCCAGCAGCCGCGGTACTACGTATGGTGCAAGCGTTATCCGGATTTACTGGGTGTAAAGGGCGCGTAGACGGATGGGCAAGTCTGAAGTGAAAGCCCGGGGCTCAACCCCGGGACTGCTTTGGAAACTGTTCATCTGGAGTGCTGGGTAGGTAAGTGGAATTCCTAGTGTAGCGGTGAAATGCGTAGATATTAGGAGGAACACCAGTGGCGAAGGCGGCTTGCTGGACGGTAACTGACGTTGAGGCTC…	>denovo83234	Bacteria;Firmicutes;Clostridia;Clostridiales;Lachnospiraceae;Ruminococcus2	0.184275								0.0181538		0.0229521	0.00711288				0.00274228	0.0109721								0.0014861																		0.0244247	0.00482369
CCTACGGGGGGCTGCAGTGGGGAATATTGCACGATGGGGGAAACCCTGATGCAGCGACGCCGCGTGAGTGAAGAAGTATTTCGGTATGTAAAGCTCTATCAGCAGGGAAGAAAATGACGGTACCTGACTAAGAAGCCCCGGCTAACTACGTGCCAGCAGCCGCGGTAATACGTAGGGGGCAAGCGTTATCCGGATTTACTGGGTGTAAAGGGAGCGTAGACGGCGAAGCAAGTCTGTAGTGAAAGCCCGGGGCTCAACCGCGGGACTGCTTTGGAAACTGTTTTGCTGGGGTGCTGGGGAGGTAAGTGGAATTCCTAGGGTAGCGGTGAAATGCGTAGATAGTAGGAGGAACACCAGTGGCGAAGGCGGCTTACTGGACAGTAACTGACGTTGAGGCTC…	>denovo116928	Bacteria;Firmicutes;Clostridia;Clostridiales;Lachnospiraceae	0.183636										0.00208655	0.00284515	0.00145438			0.00548456	0.0109721							0.00304535			0.005251	0.00852648	0.00766832						0.00112887	0.00688452			0.00168808
CCTACGGGTGGCTGCAGTGGGGAATATTGCACAATGGGGGAAACCCTGATGCAGCGACGCCGCGTGAGTGAAGAAGTATTTCGGTATGTAAAGCTCTATCAGCAGGGGAGAAAATGACGGTACCTGAGTAAGAAGCCCCGGCTAACTACGTGCCAGCAGCCGCGGTAATACGTAGGGGGCACGCGTTATCCGGATTTACTGGGTGTAAAGGGAGCGTAGACGGTGAAGCAAGTCTGGAGTGAAAACCCGGGGCTTAACCACGGGATTGCTTTGGAAACTGTTTTGCGAGAGTGCTGGAGAGGTAAGTGGAATTCCTAGTGTAGCGGTGAAATGCGTAGATATTAGGAGGAACACCAGTGGCGAAGGCGGCTTACTGGACAGTAACTGACGTTGAGGCTC…	>denovo26512	Bacteria;Firmicutes;Clostridia;Clostridiales;Lachnospiraceae	0.183636		0.0111351	0.0361503	0.0100588		0.00307721	0.00771605	0.00907688		0.00208655	0.0298741	0.0058175			0.00274228	0.00365738		0.0688784	0.0739675	0.0267998		0.0531794	0.0822243	0.0267499		0.094518	0.0298427	0.0511221			0.0120734	0.0032111		0.00225774	0.0206536	0.00197297		0.0168808	0.025153			0.0348924	0.0482369	0.0515117		0.0328932
CCTGCGGGAGGCAGCAGTGGGGAATATTGCACAATGGGGGAAACCCTGGTGCAGCGACGCCGCGTGAGCGAAGAAGTATCTCGGTATGTAAAGCTCTATCAGCAGGGAAGAAAATGACGGTACCTGACTAAGTAGCACCGGCTAAATACGTGCCAGCAGCCGCGGTAATACGTATGGTGCAAGCGTTATCCGGATTTACTGGGTGTAAAGGGAGCGTAGACGGAGAAGCAAGTCTGGAGTGAAAACCCGGGGCTTAACCCCGGGATTGCTTTGGAAACTGTTTAACTGGAGTGCAGGAGAGGTAAGCGGAATTCCTAGTGTAGCGGTGAAATGCGTAGATATTAGGAGGAACACCAGTGGCGAAGGCGGCTTACTGGACAGTAACTGACGTTGAGGCTC…	>denovo102319	Bacteria;Firmicutes;Clostridia;Clostridiales;Lachnospiraceae	0.183185		0.10467	0.0750813	0.0603531		0.00923162	0.00771605			0.0125193	0.0284515	0.00145438			0.0219382	0.0256016		0.0086098	0.0698582	0.00669994				0.0118888		0.042008	0.0127897	0.0370635		0.00849257	0.00402447			0.00451549	0.00458968	0.00986485		0.021945	0.0188648	0.00606642		0.183185	0.0361777	0.0554741		0.0422912
CCTATGAGTGGCAGCAGTGGGGAATATTGCACAATGGGGGAAACCCTGATGCAGCGACGCCGCGTGAAGGAAGAAGTATCTCGGTATGTAAACTGCGATCAGCAGGGAAGAAAATGACGGTACCTGACTAAGAAGCCCCGGCGAACTACGTGCCAGCAGCCGCGGTAATACGTAGGGGGCAAGCGGTATCCGGATTTACTGGGTGTAAAGGGAGCGTAGACGGCAAGGCAAGTCTGAAGTGAAAGCCCGGGGCTTAACCGCGGGACTGCTTTGGAAACTGTCTGGCTGGAGTGCCGGAGAGGTAAGCGGAATTCCTAGTGTAGCGGTGAAATGCGTAGATATTAGGAGGAACACCAGTGGCGAAGGCGGCTTACTGGACGGTAACTGACGTTGAGGCTC…	>denovo9048	Bacteria;Firmicutes;Clostridia;Clostridiales;Lachnospiraceae	0.183086						0.00615441	0.0308642				0.00142258	0.0218156		0.00481	0.00822684	0.0182869							0.00609069	0.00297221			0.00142108	0.00383416		0.00566171	0.00402447	0.0128444		0.0101598	0.0114742	0.00986485		0.00844039	0.00209608				0.00241185
CGGGCAGCAGTGGGGAATATTGCACAATGGGGGAAACCCTGATGCAGCGACGCCGCGTGAGTGAAGAAGTATTTCGGTATGTAAAGCTCTGTCAGCAGGGAAGAAGAAAGACGGTACCTGACTAAGAAGCCCCGGCTAACTACGTGCCAGCAGCCGCGGTAATACGTAGGGGGCAAGCGTTATCCGGATTTACTGGGTGTAGAGGTAGCGTAGACGGCGAAGCAAGTCTGAAGTGAAAGCCCGGGGCTAAACCGCGGGATTGCTTTGGAAACTGTTTTGCTAGAGTGCTGGAGAGGTAAGTGGAATTCCTAGTGTAGCGGTGAAATGCGTAGATATTAGGAGGAACACCAGTGGCGAAGGCGGCTTACTGGACAGTAACTGACGTTGAGGCTCGAAAGC…	>denovo59628	Bacteria;Firmicutes;Clostridia;Clostridiales;Lachnospiraceae;Clostridium XlVa	0.182525										0.0250386	0.0227612	0.0290875		0.02886	0.0658147	0.0109721										0.005251	0.018474	0.00766832						0.044026	0.00917936	0.0157838		0.00337615	0.00628825	0.00121328
CCTACGGGTGGCTGCAGTGGGGAATATTGCACAATGGGGGAAACCCTGATGCAGCGACGCCGCGTGAGTGAAGAAGTATTTCGGTATGTAAAGCTCTATCAGCAGGGAAGAAAATGACGGTACCTGACTAAGAAGCCCCGGCTAACTACGTGTCAGCAGCCGCGGTAATACGTAGGGGGCAAGCGTTATCCGGATTTACTGGGTGTAAAGGGAGCGTAGACGGCGAAGCAAGTCTGAAGTGAAAACCCAGGGCTCAACCCTGGGACTGCTTTGGAAACTGTTTGTCTAGAGTGCCGGAGAGGTAAGCGGAATTCCTAGTGTAGCGGTGGAATGCGTAGATATTAGGAGGAACACCAGTGGCGAAGGCGGCTTTCTGGACTGTAACTGACGCTGAGGCTC…	>denovo111305	Bacteria;Firmicutes;Clostridia;Clostridiales;Lachnospiraceae	0.182108																0.00365738
CCTACGGGTGGCAGCAGTGGGGGATATTGCACAATGGAGGAAACTCTGATGCAGCGACGCCGCGTGAGGGAAGACGGTCTTCGGATTGTAAACCTCTGTCTTTAGGGACGAAAAAATGACGGTACCTAAGGAGGAAGCCACGGCTAACTACGTGCCAGCAGCCGCGGTAATACGTAGGTGGCAAGCGTTGTCCGGAATTACTGGGTGTAAAGGGTGCGTAGGCGGTTTGGTAAGTCAGAAGTGAAATCCATGGGCTTAACCCATGAACTGCTTTTGAAACTATCGAACTTGAGTGAAGTAGAGGTAGGCGGAATTCCCGGTGTAGCGGTGAAATGCGTAGAGATCGGGAGGAACACCAGTGGCGAAGGCGGCCTACTGGGCTTTAACTGACGCTGAGGC…	>denovo33870	Bacteria;Firmicutes;Clostridia;Clostridiales;Ruminococcaceae;Clostridium IV	0.181538		0.0311783	0.00834237	0.035206		0.00923162	0.0694444	0.181538																0.0014861		0.068263	0.0298427	0.0447319														0.00348924	0.00482369
CCTACGGGTGGCAGCAGTGGGGAATATTGGACAATGGGGGAAACCCTGATCCAGCGACGCCGCGTGACTGAAGAAGTATTTCGGTATGTAAAGGTCTATCAGCAGGGAAGAAAATGACGGTACCTGACTAAGAAGCACCGGCTAAATACGTGCCAGCAGCCGCGGTAATACGTATGGTGCAAGCGTTATCCGGATTTACTGGGTGTAAAGGGAGCGTAGACGGATGGGCAAGTCTGAAGTGAAAGCCCGGGGCTCAACCCCGGGACTGCTTTGGAAGCTGTTCATCTGGAGTGCTGGAGAGGTAAGTGGAAGTCCTAGTGGAGCGGTGAAGTGCGTAGATATTAGGAGGAACACCAGTGGCGAAGGCGGCTTACTGGACAGTAACTGACGTTGAGGCTC…	>denovo35954	Bacteria;Firmicutes;Clostridia;Clostridiales;Lachnospiraceae;Ruminococcus2	0.181197				0.00502942						0.0041731	0.00284515	0.00290875			0.00274228	0.00731475				0.00334997				0.00297221							0.00804894	0.0032111						0.00168808
CCTACGGGTGGCTGCAGTGAGGAATATTGGTCAATGGACGAGAGTCTGAACCAGCCAAGTAGCGTGAAGGATGACTGCCCTATGGGTTGTAAACTTCTTTTATATGGGAATAAAGTATTCCACGTGTGGGATTTTGTATGTACCATATGAATAAGGATCGGCTAACTCCGTGCCAGCAGCCGCGGTAATACGGAGGATCCGAGCGTTATCCGGATTTATTGGGTTTAAAGGGAGCGTAGATGGATGTTTAAGTCAGTTGTGAAAGTTTGCGGCTCAACCGTAAAATTGCAGTTGATACTGGATGTCTTGAGTGCAGTTGAGGCAGGCGGAATTCGTGGTGTAGCGGTGAAATGCTTAGATATCACGAAGAACTCCGATTGCGAAGGCAGCCTGCTAGAC…	>denovo95748	Bacteria;Bacteroidetes;Bacteroidia;Bacteroidales;Bacteroidaceae;Bacteroides	0.181159
CCTACGGGTGGCAGCAGTGAGGAATATTGGTCAATGGACGAGAGTCTGAACCAGCCAAGTAGCGTGAAGGATGACTGCCCTATGGGTTGTAGACTTCTTTTATATGGGAATAAAGTATTCCACGTGTGGGATTTTGTATGTACCATATGAATAAGGATCGGCTAACTCCGTGCCAGCAGCCGCGGTAATACGGAGGATGCGAGCGTTATCCGGATTTATTGGGTTTAAAGGGTGCGTAGGTGGTAATTTAAGTCAGCGGTGAAAGTTTGTGGCTCAACCATAAAATTGCCGTTGAAACTGGGTTACTTGAGTGTGTTTGAGGTAGGCGGAATGCGGGGTGTAGCGGTGAAATGCATAGATATCACGCAGAACTCCAATTGCGAAGGCAGCTTACTAAAC…	>denovo7329	Bacteria;Bacteroidetes;Bacteroidia;Bacteroidales;Porphyromonadaceae;Parabacteroides	0.181159
CCTACGGGTGGCAGCAGTGGGGAATATTGCACAATGGGGGAAACCCTGATGCAGCGATGCCGCGTGAGGGAAGAAGGTTTTCGGATTGTAAACCTCTGTTTTAAGTGAAGATAATGACGGTAGCTTAAGAGGAAGCCACGGCTAACTACGTGCCAGCAGCCGCGGTAATACGTAGGGGGCAAGCGTTATCCGGATTTACTGGGTGTAAAGGGAGCGTAGACGGTGAAGCAAGTCTGGAGTGAAAACCCGGGGCTTAACCCCGGGATTGCTTTGGAAACTGTTTAACTGGAGTGCAGGAGAGGTAAGCGGAATTCCTAGTGTAGCGGTGAAATGCGTAGATATTAGGAGGAACACCAGTGGCGAAGGCGGCTTACTGGACTGTAACTGACGTTGAGGCTC…	>denovo76413	Bacteria;Firmicutes;Clostridia;Clostridiales;Lachnospiraceae	0.18082			0.00556158	0.0704119				0.00907688			0.0156483							0.00573987									0.00568432	0.00127805				0.0032111		0.00564436	0.00917936			0.00168808	0.0314413			0.11689	0.00964739	0.0118873		0.00469903
CCTACGGGGGGTAGCAGTGGGGAATATTGCACAATGGGGGAAACCCTGATGCAGCGACGCCGCGTGAAGGAAGAAGTATCTCGGTATGTAAACTTCTATCAGCAGGGAAGAAAATGACGGTACCTGACTAAGAAGCCCCGGCTAACTACGTGCCAGCAGCCGCGGTAATACGTAGGGGGCAAGCGTTATCCGGATTTACTGGGTGTAAAGGGCGCGTAGACGGAAGGGCAAGTCTGTAGTGAAACCCCGGGGCTCAACCCCGGGACTGCTTTGGAAACTGTTTATCTAGAGTGCTGGAGAGGTAAGTGGAAGTCCTAGTGTAGAGGTGAAATGCGTAGATATTAGGAGGAACACCAGTGGCGAAGGCGGCTTACTGGACAGTAACTGACGTTGAGGCTC…	>denovo118415	Bacteria;Firmicutes;Clostridia;Clostridiales;Lachnospiraceae	0.17891				0.00502942		0.0184632	0.00771605	0.0181538			0.00426773	0.00436313		0.01924	0.00548456	0.00731475			0.00821862					0.00297221			0.0071054	0.00383416		0.00849257		0.0256888		0.00338662	0.00458968	0.0118378		0.00168808						0.00396244		0.00469903
CCTACGGGTGGCTGCAGTGGGGAATATTGGGCAATGGGCGCAAGCCTGACCCAGCAACGCCGCGTGAAGGAAGAAGGCCCTCGGGTTGTAAACTTCTTTTGTCAGGGACGAAGCAAGTGACGGTACCTGACGAATAAGCCACGGCTAACTACGTGCCAGCAGCCGCGGTGATACGTAGGTGGCAAGCGTTATCCGGATTTACTGGGTGTAAAGGGAGCGTAGACGGAGAAGCAAGTCTGGAGTGAAAGCCCGGGGCTCAACCGCGGGACTGCTTTGGAAACTGGTTTGCTAGAGTGCTGGAGAGGTAAGTGGAATTCCTAGTGTAGCAGTGAAATGCGTAGATATTAGGAGGAACACCAGTGGCGAAGGCGGCTTACTGGACAGTAACTGACGTTGAGG…	>denovo122815	Bacteria;Firmicutes;Clostridia;Clostridiales;Lachnospiraceae	0.17797						0.00307721					0.00284515	0.00145438		0.17797	0.0329074	0.0914344							0.00304535			0.026255	0.0127897	0.0140586			0.00201223			0.0135465				0.00506423		0.00242657
CCTACGGGTGGCAGCAGTGGGGGATATTGCACAATGGGGGAAACCCTGATGCAGCGACGCCGCGTGAGCGAAGAAGTATTTCGGTATGTAAAGCTCTATCAGCAGGGAAGAAAATGACGGTACCTGAGTAAGAAGCCCCGGCTAACTACGTGCCAGCAGCCGCGGTAATACGTAGGGGGCAAGCGTTATCCGGATTTACTGGGTGTAAAGGGAGCGTAGACGGCGAGGCAAGTCTGATGGGAAAGGCCGGGGCTCAACCCCGGGACTGCATTGGAAACTGTTTTGCTGGAGTGCCGGAGAGGTAAGCGGAATTCCTAGTGTAGCGGTGAAATGCGTAGATATTAGGAGAAACTCCAGTGGCGAAGGCGGCTTACTGGACGGCAACTGACGTTGAGGCTC…	>denovo17562	Bacteria;Firmicutes;Clostridia;Clostridiales;Lachnospiraceae;Ruminococcus2	0.177111		0.0155892	0.00278079	0.095559		0.00307721					0.0483676	0.0058175				0.00365738		0.0172196		0.0100499											0.00201223			0.00112887					0.00209608			0.0104677	0.00241185	0.00792487
CCTACGGGTGGCTGCAGTGGGGGATATTGCACAATGGGGGAAACCCTGATGCAGCGACGCCGCGTGAGTGAAGAAGTATTTCGGTATGTAAAGCTCTATCAGCAGGGAAGAGAATGACGGTACCTGAGTAAGAAGCCCCGGCTAACTACGTGCCAGCAGCCGCGGTAATACGTAGGGGGCAAGCGTTATCCGGATTTACTGGGTGTAAGGGGAGCGTAGACGGCAAATCAAGTCTGAAGTGAAAGCCCGGGGCTCAACCCCGGGACTGCTTTGGAAACTGTTTTGCTAGAGTGCTGGAGAGGTAAGCGGAATTCCTAGTGTAGCGGTGAAATGCGTAGATATTAGGAGGAACACCAGTGGCGAAGGCGGCTTACTGGACTGTAACTGACGTTGAGGCTC…	>denovo87397	Bacteria;Firmicutes;Clostridia;Clostridiales;Lachnospiraceae	0.176761		0.0356324	0.0222463	0.0251471		0.0584669				0.0104328	0.00284515	0.0101806		0.00962001		0.00731475		0.0172196	0.0123279	0.00334997		0.0455823	0.0730883	0.00297221		0.026255	0.018474	0.0115025				0.0288999		0.0079021	0.0367175	0.0197297		0.00506423	0.00419217	0.00242657		0.00872311	0.0458251	0.0435868		0.0140971
CCTACGGGAGGCAGCAGTGGGGAATATTGCACAATGGGGGAAACCCTGATGCAGCGACGCCGCGTGAGTGAAGAAGTATTTCGGTATGTAAAGCTCTATCAGCAGGGAAGAAAATGACGGTACCTGACTAAGAAGCCCCGGCTAACTACGTGCCAGCAGCCGCGGTAATACGTAGGGGGCAAGCGTTATCCGGATTTACTGGGTGTAAAGGGAGCGTAGACGGCATGGCAAGTCTGGAGTGAAAACCCAGGGCTCAACCTTGGGATTGCTTTGGAAACTGTCAAGCTGGAGTGCCGGAGAGGTAAGCGGAATTCCTAGTGTAGCGGTGAAATGCGTAGAGATCGGGAGGAACACCAGTGGCGAAGGCGGCCTACTGGGCTTTAACTGACGCTGAGGCAC…	>denovo6702	Bacteria;Firmicutes;Clostridia;Clostridiales;Lachnospiraceae	0.176173			0.00278079			0.00307721	0.00771605	0.00907688		0.00208655				0.01924	0.00822684	0.00731475		0.00286993	0.00410931			0.0227912	0.00913604	0.00743052		0.063012	0.0653697	0.023005		0.0339703	0.00402447	0.0032111						0.00337615		0.00242657		0.00523387	0.00482369	0.0118873		0.00469903
CCTACGGGTGGCAGCAGTGGGGAATATTGCACAATGGGGGAAACCCTGATGCAGCGACGCCGCGTGAGCGATGAAGTATTTCGGTATGTAAAGCTCTATCAGCAGGGAAGAAAATGACGGTACCTGACTAAGAAGCACCGGCTAAATACGTGCCAGCAGCCGCGGTAATACGTATGGTGCAAGCGTTATCCGGCTTTACTGGGTGTAAAGGGAGCGTAGACGGAGAAGCAAGTCTGGAGTGATAACCCGGGGCTCAACCCCGGGACTGCTGTGGAAACTGTTTTTCGAGAGTGCCGGAGAGGTAAGCGGAATTCCTAGTGTAGCGGTGAAATGCGTAGATATTAGGAGGAACACCAGTGGCGAAGGCGGCTTACTGGACGGTAACTGACGTTGAGGCTC…	>denovo119839	Bacteria;Firmicutes;Clostridia;Clostridiales;Lachnospiraceae;Ruminococcus2	0.175935		0.175935	0.0695198	0.0502942		0.00307721	0.0154321	0.00907688		0.00625965	0.00284515	0.00145438		0.00962001	0.00822684	0.00731475		0.0114797	0.0205465	0.0100499							0.00142108	0.00255611		0.00283086					0.00458968							0.00348924	0.0144711	0.00792487		0.00469903
CCTACGGGAGGCAGCAGTGGGGAATTTTGCGCAATGGGGGCAACCCTGACGCAGCAACGCCGCGTGCGGGACGAAGGCCTTCGGGTCGTAAACCGCTTTCAGCAGGGAAGAAACCGACGGTACCTGCAGAAGAAGCCCCGGCTAACTACGTGCCAGCAGCCGCGGTAATACGTAGGGGGCGAGCGTTGTCCGGAATCATTGGGCGTAAAGGGCGCGTAGGCGGCCCCTCAAGCGGGATCTCTAATCCGAGGGCTCAACCCCCGGCCGGATCCCGAACTGGGGGGCTCGGGTGCGGTAGAGGCAGGCGGAATTCCCGGTGTAGCGGTGGAATGCGCAGATATCGGGAGGAACACCGATGGCGAAGGCAGCCTGCTGGGCCGTCACCGACGCTGAGGCGCG…	>denovo53152	Bacteria;Actinobacteria;Actinobacteria;Coriobacteriales;Coriobacteriaceae;Eggerthella	0.175878				0.0100588						0.152318	0.0967352	0.0756276		0.0817701	0.00274228							0.0379853	0.0334988	0.0118888		0.115522	0.0667908	0.0217269				0.0032111		0.00112887	0.013769			0.021945	0.0209608	0.00485313		0.00523387	0.0144711	0.00792487		0.00469903
CCTACGGGGGGCAGCAGTGGGGGATATTGCGCAATGGGGGAAACCCTGACGCAGCAACGCCGCGTGAAGGACGAAGGTTTTCGGATTGTAAACTTCTTTTGTCAGGGACGAAGAAATGACGGTACCTGACGAATAAGCTCCGGCTAACTACGTGCCAGCAGCCGCGGTAATACGTAGGGAGCGAGCGTTGTCCGGAATTACTGGGTGTAAAGGGTGCGTAGGCGGCAGAGCAAGTCAGATGTGAAATACACGGGCTTAACCCGTGGGCTGCATTTGAAACTGTTCAGCTTGAGTGGAGCAGAGGCAGGCGGAATTCCCGGTGTAGCGGTGAAATGCGTAGATATTAGGAGGAACACCAGTGGCGAAGGCGGCTTACTGGACAGTAACTGACGTTGAGGC…	>denovo8720	Bacteria;Firmicutes;Clostridia;Clostridiales;Ruminococcaceae;Ruminococcus	0.174806						0.00923162	0.00771605	0.00907688								0.00365738				0.00334997						0.036757	0.0071054	0.00511221														0.013957	0.00482369
CCTACGGGTGGCTGCAGTCGGGAATATTGCGCAATGGAGGAAACTCTGACGCAGTGACGCCGCGTGTAGGAAGAAGGTTTTCGGATTGTAAACTATTGTCGTTAGGGAAGAAAAAAGACAGTACCTAAGGAGGAAGCTCCGGCTAACTACGTGCCAGCAGCCGCGGTAATACGTAGGGAGCAAGCGTTATCCGGATTTATTGGGTGTAAAGGGTGCGTAGACGGGTAATCAAGTTAGTTGTGAAATCCCTTAGCTTAACTGAGGAACTGCAACTAAAACTGGTTATCTTGAGTACAGGAGAGGTAAGTGGAATTCCTAGTGTAGCGGTGAAATGCGTAGATATTAGGAGGAACACCAGTGGCGAAGGCGGCCTACTGGGCACCAACTGACGCTGAGGCT…	>denovo71466	Bacteria;Firmicutes;Clostridia;Clostridiales	0.174419		0.00222702				0.00615441														0.00334997
CCTACGGGTGGCTGCAGTGGGGAATATTGCACAATGGGGGGAACCCTGATGCAGCGACGCCGCGTGAGCGAAGAAGTATTTCGGTATGTAAAGCTCTATCAGCAGGGAAGAAACTGACGGTACCTGACTAAGAAGCACCGGCTAAATACGTGCCAGCAGCCGCGGTAATACGTATGGTGCAAGCGTTATCCGGATTTACTGGGTGTAAAGGGAGCGTAGACGGAGCAGCAAGTCTGGAGTGAAAACCCGGGGCTCAACCCCGGGACTGCTTTGGAAACTGTTGTTCTAGAGTGCTGGAGAGGTAAGTGGAATTCCTAGGGTAGCGGTGAAATACGTAGATATTAGGAGGAACGCCAGTAGCGAAGGCGGCTTACTGGACAGTAACTGACGTTGAGGCTC…	>denovo129378	Bacteria;Firmicutes;Clostridia;Clostridiales;Lachnospiraceae;Ruminococcus2	0.174226		0.00222702								0.0146059	0.0156483	0.0130894		0.01924	0.0137114	0.0256016							0.00609069			0.005251	0.0127897	0.0153366						0.0112887	0.00688452	0.00789188		0.00168808	0.00419217	0.00242657						0.00469903
CCTACGGGCGGCAGCAGTGGGGAATATTGCACAATGGGGGAAACCCTGATGCAGCGACGCCGCGTGGAGGAAGAAGGTCTTCGGATTGTAAACTCCTGTTGTTGGGGAAAAAGAGGATGGTACCCAACAAGGAAGTGACGGCTAACTACGTGCCAGCAGCCGCGGTAAAACGTAGGTCACGAGCGTTGTCCGGAATTACTGGGTGTAAAGGGTGCGTAGGCGGATCTGCAAGTCAGTAGTGAAATCCCAGGGCTTAACCCTGGAACTGCTATTGAAACTGTGGGTCTTGAGTGAGGTAGAGGCAGGCGGAATTCCCGGTGTAGCGGTGAAATGCGTAGAGATCGGGAGGAACACCAGTGGCGAAGGCGGCCTGCTGGGCCTTAACTGACGCTGAGGCAC…	>denovo89679	Bacteria;Firmicutes;Clostridia;Clostridiales;Ruminococcaceae;Faecalibacterium	0.174081		0.0111351	0.00278079	0.00502942																0.00334997
CCTACGGGTGTCAGCAGTGGGGAATATTGCACAATGGGGGAAACCCTGATGCAGCGACGCCGCGTGAAGGAAGAAGTATCTCGGTATGTAAACTTCTATCAGCAGGGAAGAAAGTGACGGTACCTGACTAAGAAGCACCGGCTAAATACGTGCCAGCAGCCGCGGTAATACGTATGGTGCAAGCGTTATCCGGATTTACTGGGTGTAAAGGGAGCGTAGACGGATAGGCACGTCTGGAGTGAAAACCCGGTGCTCAACCCCGGGACTGCTTTGGAAACTGTTTATCTAGAGTGCTGGAGAGGGAAGTGGAATTCCTAGGGTAGCGGTGAAATGCGTAGATATTAGGAGGAACACCAGTGGCGAAGGCGGCTTACTGGACAGTAACTGACGCTGAGGCTC…	>denovo15899	Bacteria;Firmicutes;Clostridia;Clostridiales;Lachnospiraceae;Coprococcus	0.173955		0.00445405	0.00278079	0.00502942		0.00307721	0.0154321	0.00907688				0.00290875			0.00274228			0.00286993				0.0227912	0.00304535				0.00852648	0.00255611		0.00566171	0.00402447	0.0064222		0.00112887		0.00197297
CTACGGGTGGCAGCAGTGGGGAATATTGCACAATGGGGGAAACCCTGATGCAGCGACGCCGCGTGAGCGAAGAAGTATCTCGGTATGTAAAGCTCTATCAGCAGGGAAGAAAATGGCGGTACCTGACTAAGAAGCACCGGCTAAATACGTGCCAGCAGCCGCGGTAATACGTATGGTGCAAGCGTTATCCGGATTTACTGGGTGTAAAGGGAGCGTAGACGGAGAAGCAAGTCTGGAGTGAAAGCCCGGGGCTCAACCCCGGGACTGCTTTGGAAACTGTTTATCTAGAGTGCTGGAGAGGTAAGTGGAATTCCTAGTGTAGCGGTGAAATGCGTAGATATTAGGAGGAACACCAGTTGCGAAGGCGGCTCTCTGGACTGTAACTGACACTGAGGCACG…	>denovo65486	Bacteria;Firmicutes;Clostridia;Clostridiales;Lachnospiraceae;Coprococcus	0.173648		0.00222702				0.00923162					0.00284515	0.00145438		0.00962001		0.00365738										0.005251	0.00284216	0.00255611		0.00283086				0.00112887		0.00197297						0.00872311				0.00469903
CCTACGGGTGGCTGCAGTAGGGAATATTGCACAATGGGGGAAACCCTGATGCAGCGACGCCGCGTGAGCGCAGAAGTATCTCGGTATGTAAAGCTCTATCAGCAGGGAAGAAGATGACGGTACCTGACTAAGAAGCACCGGCTAAATACGTGCCAGCAGCCGCGGTAATACGTATGGTGCAAGCGTTATCCGGATTTAATGGGTGTAACGGGAGCGTAGACGGAAGAGCAAGTCTGGCGTGAAAGCCCGGGGCTGAACCCCGGGACTGCTTTGGAAACTGTTTATCTAGAGTGCCGGAGAGGCAAGCGGAATTCCTAGAGTAGCGGTGAAATGCGTAGATATTAGGAGGAACACCAGTGGCGAAGGCGGCTTGCTGGACGGTAACTGACGTTGAGGCTC…	>denovo35655	Bacteria;Firmicutes;Clostridia;Clostridiales;Lachnospiraceae	0.173603		0.00222702																0.00286993	0.00410931	0.00334997
CCTACGGGGGGCTGCAGTGGGGAATATTGCACAATGGGGGAAACCCTGATGCAGCGACGCCGCGTGAGTGAAGAAGTATTTCGGTATGTAAAGCTCTATCAGCAGGGAAGAAAATGACGGTACCTGCCTAAGAAGCCCCGGCTAACTACGTGCCAGCAGCCGCGGTAATACGTAGGGGGCAAGCGTTATCCGGATTTACTGGGTGTAAAGGGAGCGTAGACGGCAAGGTAAGTCTGAAGTGAAAGCCAGGGGCTTAACCGCGGGACTGCTTTGGAAACTGTTTTGCTAGAGTGCTGGAGAGGTAAGTGGAATTCCTAGTGTAGCGGTGAAATGCATAGATATTAGGAGGAACACCAGTGGCGAAGGCGGCTTACTGGACAGTAACTGACGTTGAGGCTC…	>denovo4415	Bacteria;Firmicutes;Clostridia;Clostridiales;Lachnospiraceae	0.172886		0.00445405								0.00208655	0.00426773	0.00872626		0.01443	0.0274228	0.00365738							0.00304535					0.00383416				0.00963329		0.00225774	0.013769	0.00197297		0.00168808				0.00174462
CCTACGGGTGGCTGCAGTGGGGAATATTGCACAATGGGGGAAACCCTGATGCAGCGACGCCGCGTGAGCGAAGAAGTATCTCGGTATGTAAAGCTCTATCAGCAGGGAAGAAAATGACGGTACCTGACTAAGAAGCACCGGCTAAATACGTGCCAGCAGCCGCGGTAATACGTATGGTGCAAGCGTTATCCGGATTTACTGGGTGTAAAGGGAGCGTAGACGGAGAAGCAAGTCTGGAGTGAAAGCCCGGGGCTCAACCCCGGGACTGCTTTGGAAACTGTTTGTCTAGAGTGCCGGAGAGGTAAGCGGAATTCCTAGTGTAGCGGTGAAATGCGTAGATATTAGGAGGAACACCAGTGGCGAAGGCGGCTCTCTGGTCTGCAACTGACGCTGAGGCTC…	>denovo110966	Bacteria;Firmicutes;Clostridia;Clostridiales;Lachnospiraceae;Coprococcus	0.172516		0.0334053	0.013904	0.0704119		0.00307721				0.00625965	0.00284515	0.00145438		0.03848	0.0356496	0.0256016		0.00286993	0.00410931	0.00669994			0.00609069			0.010502	0.00426324	0.0178927		0.0141543	0.00201223	0.0064222		0.00112887		0.00394594		0.00337615	0.00209608	0.00363985		0.0331478	0.00482369	0.0316995		0.00939805
CCTACGGGCGGCAGCAGTGAGGGATATTGGTCAATGGGGGAAACCCTGAACCAGCAACGCCGCGTGAGGGATGACGGCCTTCGGGTTGTAAACCTCTGTCCTCTGTGAAGATAATGACGGTAGCAGAGGAGGAAGCTCCGGCTAACTACGTGCCAGCAGCCGCGGTAATACGTAGGGGGCAAGCGTTATCCGGATTTACTGGGTGTAAAGGGAGCGTAGGCGGTCTGACAAGTCAGAAGTGAAAGCCCGGGGCTCAACCTCGGGACTGCTTTTGAAACTGCCGGACTAGATTGCAGGAGAGGTAAGTGGAATTCCTAGTGTAGCGGTGAAATGCGTAGATATTAGGAGGAACACCAGTGGCGAAGGCGGCTTACTGGACTGTAAATGACGCTGAGGCTC…	>denovo87491	Bacteria;Firmicutes;Clostridia;Clostridiales;Clostridiaceae 1;Anaerosporobacter	0.172461		0.00445405	0.00278079	0.0201177		0.00923162	0.0154321	0.172461																		0.005251																		0.00396244
CCTACGGGTGGCTGCAGTGGGGAATATTGCACAATGGGGGAAACCCTGATGCAGCGACGCCGCGTGAAGGAAGAAGTATCTCGGTATGTAAACTTCTATCAGCAGGGAAGAAAATGACGGTACCTGACTAAGATGCCCCGGCTAACTACGTGCCAGCAGCCGCGGTAATACGTAGGGGGCAAGCGTTATCCGGATTTACTGGGTGTAAAGGGAGCGTAGACGGCTGTGCAAGTCTGGAGTGAAAGCCCGGGGCTCAACCCCGGGACTGCTTTGGAAACTGTACGGCTGGAGTGCTGGAGAGGCAAGCGGAATTCCTAGTGTAGCGGTGAAATGCGTAGATATTAGGAGGAACACCAGTGGCGAAGGCGGCTTGCTGGACAGTAACTGACGCTGAGGCAC…	>denovo123518	Bacteria;Firmicutes;Clostridia;Clostridiales;Lachnospiraceae	0.172068										0.00208655	0.00142258	0.0101806						0.00573987		0.00334997								0.00255611			0.00201223	0.0032111		0.00112887				0.00168808					0.00241185
CTTACGGGAGGCAGCAGTGGGGAATATTGGGCAATGGGCGCAAGCCTGACCCAGCAACGCCGCGTGAAGGAAGAAGGCCCTCGGGTTGTAAACTTCTTTTGTCAGGGACGAAGCAAGTGACGGTACCTGACGAATAAGCCACGGCTAACTACGTGCCAGCAGCCGCGGTAATACGTATGGTGCAAGCGTTATCCGGATTTACTGGGTGTAGAGGGAGCGTAGACGGAGCAGCAAGTCTGGAGTGAAAACCCGGGGCTCAACCCCGGGACTGCTTTGGAAACTGTTGTTCTAGAGTGCTGTAGAGGTAAGTGGAAATCCTAGTGTAGCGGTGAAATGCGTAGATATTAGGAGGAACACCAGTGGCGAAGGCGGCTTACTGGACAGTAACTGACGTTGAGG…	>denovo34293	Bacteria;Firmicutes;Clostridia;Clostridiales;Lachnospiraceae	0.171897		0.00222702	0.00556158			0.00307721	0.00771605				0.00711288	0.00436313		0.03848	0.0301651	0.171897							0.0213174	0.00594442		0.031506	0.035527	0.0319513		0.00283086	0.00201223	0.0064222		0.0079021	0.00229484	0.00197297		0.0118165	0.00209608	0.00242657						0.0187961
CCTACGGGAGGCTGCAGTGGGGAATATTGCACAATGGGGGAAACCCTGATGCAGCGATGCCGCGTGAGGGAAGAAGGTTTTCGGATTGTAAACCTCTGTTTTAAGTGAAGATAATGACGGTAGCTTAAGAGGAAGCCACGGCTAACTACGTGCCAGCAGCCGCGGTAATACGTATGGTGCAAGCGTTATCCGGATTTACTGGGTGTAAAGGGAGCGTAGACGGAGCAGCAAGTCTGGAGTGAAAACCCGGGGCTCAACCCCGGGACTGCTTTGGAAACTGTTGTTCTAGAGTGCTGGAGAGGTAAGTGGAATTCCTAGTGTAGCGGTGAAATGCGTAGATATTAGGAGGAACACCAGTGGCGAAGGCGGCTTACTGGACAGTAACTGACGTTGAGGCTC…	>denovo109116	Bacteria;Firmicutes;Clostridia;Clostridiales;Lachnospiraceae;Ruminococcus2	0.17189		0.00222702		0.0150883							0.00853546	0.00145438														0.010502	0.00568432							0.00225774	0.00229484			0.00168808	0.0104804			0.00697849
CCTCGGGTGGCAGCAGTGAGGAATATTGGTCAATGGCCGTAAGGCTGAACCAGCCAAGTAGCGTGAAGGACGACGGCCCTACGGGTTGTAAACTTCTTTTATAAGGGAATAAAGTGTGGGACGTGTTCCATTTTGTATGTACCCTATGAATAAGCATCGGCTAACTCCGTGCCAGCAGCCGCGGTAATACGGAGGATGCGAGCGTTATCCGGATTTATTGGGTTTAAAGGGTGCGTAGGTGGTAATTTAAGTCAGCGGTGAAAGTTTGTGGCTCAACCATAAAATTGCCGTTGAAACTGGGTTACTTGAGTGTGTTTGAGGTAGGCGGAATGCGTGGTGTAGCGGTGAAATGCATAGATATCACGCAGAACTCCAATTGCGAAGGCAGCTTACTAAACC…	>denovo43738	Bacteria;Bacteroidetes;Bacteroidia;Bacteroidales;Porphyromonadaceae;Parabacteroides	0.171593
CCTACGGGTGTCAGCAGTGGGGAATATTGCACAATGGGGGAAACCCTGATGCAGCGACGCCGCGTGAGCGAAAAAGTATTTCGGTATGTAAAGCTCTATCAGCAGGGAAGAAATTGACGGTACCTGACTAAGAAGCACCGGCTAAATACGTGCCAGCAGCCGCGGTAATACGTATGGTGCAAGCGTTATCCGGATTTACTGGGTGTAAAGGAAGCGTAGACGGAGCAGCACGTCTGGAGTGAAAACCCGGTGCTCAACCCCGGGACTGCTTTGGAAACTGTTGTTCTAGAGTGCTGGAGAGGTAAGTGGAACTCCTAGAGTAGCGGTGAAATGCGTAGATATTAGGAGGAACACCAGTGGCGAAGGCGGCTTACTGGACAGTAACTGACGTTGAGGCTC…	>denovo4822	Bacteria;Firmicutes;Clostridia;Clostridiales;Lachnospiraceae;Ruminococcus2	0.169611		0.00668107		0.0100588			0.00771605				0.0611708	0.00872626		0.00962001		0.0109721			0.00410931			0.00759705	0.00304535	0.00297221			0.017053	0.00766832			0.00201223			0.0101598	0.00229484	0.00394594		0.00168808	0.00628825							0.0469903
CCTACGGGTGGCTGCAGTGAGGAATATTGGTCAATGGGCGCAGGCCTGAACCAGCCAAGTAGCGTGAAGGATGACTGCCCTATGGTTTATAAACTTCTTTTATATGGGAATAAAGTTTTCCACGTGTGGAATTTTGTATGTACCATATGAAGAAGGATAGGCTAACTCCGTGCCAGCAGCCGCGGTAATACGGAGGATCCGAGCGTTATCCGGATTTATTGGGTTTAAAGGGAGCGTAGGTGGATAGTTAAGTCAGTTGTGAAAGTTTGCGGCTCAACCGTAAAATTGCAGTTGAATCTGGCAGTCTTGAGTACCGTAGAGGTGGGCGGAATTCGTGGTGTAGCGGTGAAATGCTTAGATATCACGAAGAACTCCGATTGCGAAGGCAGCTCACTAGAC…	>denovo88829	Bacteria;Bacteroidetes;Bacteroidia;Bacteroidales;Bacteroidaceae;Bacteroides	0.168823
CCTACGGGAGGCAGCAGTGGGGAATATTGCACAATGGGGGAAACCCTGATGCAGCGACGCCGCGTGAGCGAAGAAGTATTTCGGTATGTAAAGCTCTATCAGCAGGGAAGAAACTGACGGTACCTGACTAAGAAGCACCGGCTAAATACGTGCCAGCAGCCGCGGTGATACGTATGGTGCAAGCGTTATCCGGATTTACTGGGTGTAAAGGGAGCGTAGACGGATTTGCAAGTCTGAAGTGAAAGCCCGGGGCTCAACCCCGGGACTGCTTTGGAAACTGTAGGTCTTGAGTGCTGGAGAGGTAAGCGGAATTCCTAGTGTAGCGGTGAAATGCGTAGATATTAGGAGGAGAACCAGTGGCGAAGGCGGCTTACTGGACGGTAGCTGACGTTGAGGCTC…	>denovo20118	Bacteria;Firmicutes;Clostridia;Clostridiales;Lachnospiraceae;Ruminococcus2	0.168677		0.00668107	0.0250271	0.00502942		0.00615441	0.0154321				0.00426773	0.00290875							0.00410931												0.00201223							0.00337615					0.00241185
CCTACGGGTGGCAGCAGTGGGGAATATTGCACAATGGGGGAAACCCTGATGCAGCGACGCCGCGTGAGTGAAGAAGTATTTCGGTATGTAAAGCTCTATCAGCAGGGAAGAAAATGACGGTACCTGACTAAGAAGCCCCGGCTAACTACGTGCCAGCAGCCGCGGTAATACGTAGGGGGCAAGCGTTATCCGGATTTACTGGGTGTAAAGGGAGCGTAGACGGCAAGGCAAGTCTGAAGTGAAAGCCCGGGGCTTAACCGCGGGACTGCTTTGGAAACTGTCTGGCTGGAGTGCCGGAGAGGTAAGCGGAATTCCTAGTGTAGCGGTGAAATGCTTAGATATCACGAAGAACCCCGATTGCGAAGGCAGCTTGCCAGGCCTGGACTGACGTTGAGGCTC…	>denovo65914	Bacteria;Firmicutes;Clostridia;Clostridiales;Lachnospiraceae	0.16844										0.00208655		0.00872626			0.0137114	0.00365738																		0.00451549	0.0114742	0.00591891		0.00168808
CCTACGGGTGGCAGCAGTGGGGGATATTGCACAATGGGGGAAACCCTGATGCAGCAACGCCGCGTGAAGGATGAAGGTTTTCGGATTGTAAACTTCTGTTCTTAGTGACGATAATGACGGTAGCTAAGAAGAAAGCTCCGGCTAACTACGTGCCAGCAGCCGCGGTAATACGTAGGGAGCGAGCGTTGTCCGGATTTACTGGGTGTAAAGGGTGCGTAGGCGGTTTGGTAAGTCAGAAGTGAAATCCATGGGCTTAACCCATGAACTGCTTTTGAAACTATCGAACTTGAGTGAAGTAGAGGTAGGCGGAATTCCCGGTGTAGCGGTGAAATGCGTAGAGATCGGGAGGAACACCAGTGGCGAAGGCGGCCTACTGGGCTTTAACTGACGCTGAGGCAC…	>denovo100380	Bacteria;Firmicutes;Clostridia;Clostridiales;Ruminococcaceae;Clostridium IV	0.167279		0.0222702	0.00278079			0.0246177	0.0154321	0.0635382						0.00481				0.00573987		0.00334997		0.0151941	0.0121814	0.00445831		0.05251	0.0483167	0.0140586										0.00168808				0.00348924				0.00469903
CCTACGGGGGGCAGCAGTGAGGAATATTGGTCAATGGCCGTAAGGCTGAACCAGCCAAGTAGCGTGAAGGACGACGGCCCTACGGGTTGTAAACTTCTTTTATAAGGGAATAAAGTTGCGTACGCGTACGCATTTGCATGTACCTTATGAATAAGCATCGGCTAACTCCGTGCCAGCAGCCGCGGTAATACGGAGGATGCGAGCGTTATCCGGATTTATTGGGTTTAAAGGGTGCGTAGGCGGTTTGATAAGTTAGAGGTGAAATCCCGGGGCTTAACTCCGGAACTGCCTCTAATACTGTTAGACTAGAGAGTAGTTGCGGTAGGCGGAATGTATGGTGTAGCGGTGAAATGCTTAGAGATCATACAGAACACCGATTGCGAAGGCAGCTTACCAAAC…	>denovo86749	Bacteria;Bacteroidetes;Bacteroidia;Bacteroidales;Rikenellaceae;Alistipes	0.167073											0.00142258	0.00290875																						0.167073	0.119332	0.116405		0.00506423	0.00209608	0.00606642
TCTACGGGGGGCTGCAGTGGGGAATATTGCACAATGGGGGAAACCCTGATGCAGCGACGCCGCGTGAGCGAAGAAGTATTTCGGTATGTAAAGCTCTATCAGCAGGGAAGAAGAAAGACGGTACCTGACTAAGAAGCCCCGGCTAACTACGTGCCAGCAGCCGCGGTAATACGTAGGGGGCAAGCGTTATCCGGATTTACTGGGTGTAAAGGGAGCGTAGACGGAAGAGCAAGTCTGGAGTGAAAGCCCGGGGCTCAACCCCGGGACTGCTTTGGAAACTGTTTATCTAGAGTGCCGGAGAGGCAAGAGGAATTCCTAGTGTAGCGGTGAAATGCGTAGATATTAGGAGGAACACCAGTGGCGAAGGCGGCTTGCTGGACGGTAACTGACGTTGAGGCT…	>denovo16354	Bacteria;Firmicutes;Clostridia;Clostridiales;Lachnospiraceae;Clostridium XlVa	0.16684		0.00890809	0.00834237			0.00307721	0.0154321	0.0181538		0.00208655									0.00410931	0.00334997		0.00759705	0.0152267																				0.00241185	0.00396244
CCTACGGGTGGCTGCAGTGGGGAATATTGCACAATGGGGGAAACCCTGGTGCAGCGACGCCGCGTGAGCGAAGAAGTATTTCGGTATGTAAAGCTCTATCAGCAGGGAAGAAATTGACGGTACCTGACTAAGAAGCACCGGCTAAATACGTGCCAGCAGCCGCGGTAATACGTATGGTGCAAGCGTTATCCGGATTTACTGGGTGTAAAGGGAGCGTAGACGGAGCAGCAAGTCTGGAGTGAAAACCCGGGGCTCAACCCCGGGACTGCTTTGGAAACTGTTGTTCTAGAGTGCTGGAGAGGTAAGTGGAATTCCTAGTGTAGCGGTGAAATGCGTAGATATTAGGAGGAACACCGATGGCGAAGGCGGCCTGCTGGGCTTTAACTGACGCTGAGGCTC…	>denovo117775	Bacteria;Firmicutes;Clostridia;Clostridiales;Lachnospiraceae;Ruminococcus2	0.166673		0.00222702		0.00502942						0.00208655	0.0156483	0.00436313		0.00481		0.0109721							0.00913604	0.00297221			0.0213162	0.0255611		0.00283086	0.00201223				0.00229484			0.00168808								0.0187961
CTACGGGAGGCAGCAGTGGGGAATATTGCACAATGGGGGAAACCCTGTTGCAGCGATGCCGCGTGAGGGAAGAAGGTTTTCGGATTGTAAACCTCTGTTTTAAGTGAAGATAATGACGGTAGCTTAAGAGGAAGCCACGGCTAACTACGTGCCAGCAGCCGCGGTAATACGTAGGTGGCAAGCGTTGTCCGGAATTACTGGGTGTAAAGGGAGCGCAGGCGGGAGAGCAATTCAGCTGTGAAAACCACGGGCTTAACCTGTGGACTGCAGTTGAAACTGTTCTTCTTGAGTGAAGTAGAGGTAAGCGGAAGTCCGAGTGTAGCGGTGAAATACGTAGAGATTCGGAGGAACACCAGTGGCGAAGGCGGCTTACTGGGCTTTAACTGACGCTGAGGCTCG…	>denovo67152	Bacteria;Firmicutes;Clostridia;Clostridiales;Ruminococcaceae	0.166361				0.00502942							0.00142258																0.00142108	0.00127805
CCTACGGGTGGCAGCAGTGGGGAATATTGCACAATGGGGGAAACCCTGATGCAGCGACGCCGCGTGAGCGAAGAAGTATCTCGGTATGTAAAGCTCTATCAGCAGGGAAGAAAATGACGGTACCTGACTAAGAAGCACCGGCTAACTACGTGCCAGCAGCCGCGGTAATACGTATGGTGCAAGCGTTATCCGGATTTACTGGGTGTAAAGGGAGCGTAGACGGTGAAGCAAGTCTGGAGTGAAAGCCCGGGGCTTAACCCCGGGATTGCTTTGGAAACTGTTTAACTAGAGTGCCGGAGAGGTAAGCGGAATTCCTAGTGTAGCGGTGAAATGCGTAGATATTAGGAGGAATACCAGTGGCGAAGGCGGCTTACTGGACTGTAACTGACGTTGAGGATC…	>denovo128461	Bacteria;Firmicutes;Clostridia;Clostridiales;Lachnospiraceae	0.1648		0.1648	0.0611774	0.0804708		0.0123088	0.00771605	0.00907688		0.00625965	0.00569031	0.00145438		0.00481		0.00365738		0.00286993	0.0164372	0.00334997				0.0014861			0.00142108	0.00639027										0.00337615	0.00419217			0.0366371	0.00964739	0.0277371		0.0187961
CCTACGGGTGGCAGCAGTGGGGGATATTGCACAATGGAGGAAACTCTGATGCAGCGACGCCGCGTGAGGGAAGACGGTCTTCGGATTGTAAACCTCTGTCTTTAGGGACGAAAAAATGACGGTACCTAAGGAGGAAGCCACGGCTAACTACGTGCCAGCAGCCGCGGTAAAACGTAGGTCACAAGCGTTGTCCGGAATTACTGGGTGTAAAGGGAGCGCAGGCGGGTATGCAAGTTGGGAGTGAAATACATGGGCTCAACCCATGAACTGCTCTCAAAACTGTGTATCTTGAGTAGTGCAGAGGTAGGCGGAATTCCCGGTGTAGCGGTGGAATGCGTAGATATCGGGAGGAACACCAGTGGCGAAGGCGGCCTACTGGGCACCAACTGACGCTGAGGC…	>denovo6606	Bacteria;Firmicutes;Clostridia;Clostridiales;Ruminococcaceae;Faecalibacterium	0.1648		0.1648	0.0250271	0.0704119		0.0123088	0.0231481	0.136153											0.00410931	0.00669994										0.00283086												0.00697849	0.00241185	0.00792487
CCTACGGGTGGCTGCAGTGGGGGATATTGCACAATGGGGGAAACCCTGATGCAGCAACGCCGCGTGAAGGAAGAAGGTCTTCGGATTGTAAACTTCTGTCCTCAGGGAAGATAATGACGGTACCTGAGGAGGAAGCTCCGGCTAACTACGTGCCAGCAGCCGCGGTAATACGTAGGTGGCAAGCGTTGTCCGGAATTACTGGGTGTAAAGGGAGCGTAGGCGGGGAGACAAGTTGAATGTTTAAACTATCGGCTCAACTGATAGTCGCGTTCAAAACTATCACTCTTGAGTGCAGTAGAGGTAGGCGGAATTCCTAGTGTAGCGGTGAAATGCGTAGATATTAGGAGGAACACCAGTGGCGAAGGCGGCCTACTGGGCTGTAACTGACGCTGAGGCTCG…	>denovo122961	Bacteria;Firmicutes;Clostridia;Clostridiales;Ruminococcaceae	0.164526						0.00307721	0.00771605	0.00907688																0.00297221		0.015753	0.0213162	0.0447319							0.00229484							0.00348924
CCTACGGGTGGCTGCAGTGGGGAATATTTCACAATGGGGGAAACCCTGATGCAGCGACGCCGCGTGAGCGAAGAAGTATCTCGGTATGTAAAGCTCTATCAGCAGGGAAGAAAATGACGGTACCTGACTAAGAAGCACCGGCTAAATACGTGCCAGCAGCCGCGGTAATACGTATGGTGCAAGCGTTATCCGGATTTACTGGGTGTAAAGGGAGCGTAGACGGAGAAGCAAGTCTGGAGTGCAAGCCCGGGGCTCAACCCCGGGACTGCTTTGGAAACTGTTGGTCTAGAGGGCCGGAGAGGTAAGAGGAATTCCTAGTGTAGCGGTGAAATGCGTAGATATTAGGAGGAACACCAGTGGCGAAGGCGGCTTACTGGACGGTAACTGACGTTGAGGCTC…	>denovo46663	Bacteria;Firmicutes;Clostridia;Clostridiales;Lachnospiraceae;Ruminococcus2	0.164318		0.00890809	0.00834237			0.00615441				0.0396445		0.00145438		0.01443	0.0137114	0.0329164										0.010502	0.00284216	0.0102244		0.00283086				0.00564436	0.00229484	0.0138108		0.00337615	0.00419217	0.0121328		0.0593172	0.00723554	0.0118873
CCTACGGGTGGCTGCAGTGGGGAATATTGCACAATGGGGGAAACCCTGATGCAGCGACGCCGCGTGAGCGAAGAAGTATCTCGGTATGTAAAGCTCTATCAGCAGGGAAGAAGATGACGGTACCTGACTAAGAAGCACCGGCTAAATACGTGCCAGAAGCCGCGGTAATACGTATGGTGCAAGCGTTATCCGGATTTACTGGGTGTAAAGGGAGCGTAGACGGCGAAGCAAGTCTGAAGTGAGAGCCCGGGGCTCAACCGCGGGACTGCTTTGGCAACTGTTTTGCTAGAGTGCTGGAGAGGTAAGTGGAATTCCTAGTGTAGCGGTGAAATGCGTAGATATTAGGAGGAACACCAGTGGCGAAGGCGGCTTACTGGACAGTAACTGACGTTGAGGCTC…	>denovo93805	Bacteria;Firmicutes;Clostridia;Clostridiales;Lachnospiraceae	0.163854		0.00222702	0.00278079							0.0125193	0.101003	0.0058175		0.0769601	0.0329074	0.0438885							0.00304535			0.005251	0.0071054	0.0166147						0.0079021	0.00458968	0.0138108		0.00337615	0.0188648	0.00485313
CCTACGGGAGGCAGCAGTGGGGAATATTGCACAATGGGGGAAACCCTGATGCAGCGACGCCGCGTGGAGGAAGAAGGTCTTCGGATTGTAAACTCCTGTCCCAGGGGACGATAATGACGGTACCCTGGGAGGAAGCACCGGCTAACTACGTGCCAGCAGCCGCGGTAAAACGTAGGGTGCAAGCGTTGTCCGGAATTACTGGGTGTAAAGGGAGCGCAGGCGGATTGGCAAGTTGGGAGTGAAATCTATGGGCTCAACCCATAAATTGCTTTCAAAACTGTCAGTCTTGAGTGGTGTAGAGGTAGGCGGAATTCCCGGTGTAGCGGTGGAATGCGTAGATATCGGGAGGAACACCAGTGGCGAAGGCGGCCTACTGGGCACTAACTGACGCTGAGGCTC…	>denovo128765	Bacteria;Firmicutes;Clostridia;Clostridiales;Ruminococcaceae	0.163794		0.00222702						0.0816919																																		0.00174462
CCTACGGGGGGCTGCAGTGGGGAATATTGCACAATGGGGGAAACCCTGATGTAGCGACGCCGCGTGAGCGAAGAAGTATTTCGGTATGTAAAGCTCTATCAGCAGGGAAGAAACTGACGGTACCTGACTAAGAAGCACCGGCTAAATACGTGCCAGCAGCCGCGGTAATACGTATGGTGCAAGCGTTATCCGGATTTACTGGGTGTAAAGGGAGCGTAGACGGAGCAGCAAGTCTGGAGTGAAAACCCGGGGCTCAACCCCGGGACTGCTTTGGAAACTGTTGTTCTAGAGGGCTGGAGAGGTAAGTGGAATTCCTGTGGTAGCGGTTAAATGCGTAGGTATTAGGAGGAACACCAGTGGCGAAGGCGGCTTACTGGACAGTAACTGACGTTGAGGCTC…	>denovo35311	Bacteria;Firmicutes;Clostridia;Clostridiales;Lachnospiraceae;Ruminococcus2	0.162544												0.00145438		0.00481		0.0182869						0.00759705	0.00609069				0.00284216	0.00383416						0.00564436	0.00458968	0.00394594										0.00469903
CCTACGGGTGGCTGCAGTGGGGAATATTGCACAATGGGGGAAACCCTGATGCAGCGACGCCGCGTGAAGGAAGAAGTATCTCGGTATGTAAACTTCTATCAGCAGGGAAGAAAGTGACGGTACCTGACTAAGAAGCCCCGGCTAACTACGTGCCAGCAGCCGCGGTAATACGTAGGGGGCAAGCGTTATCCGGATTTACTGGGTGTATAGGGAGCGTAGACGGAATGGCAAGTCTGATGTGAAAGGCGGGGGCTCAACCCCTGGACTGCATTGGAAACTGCCAGTCTTGAGTACCGGAGGGGTAAGCGGAATTCCTAGTGTAGCGGTGAAATGCGTAGATAATAGGAGAAAAACCAGTGGCGAAGGCGGCTTACTGGACGGTAACTGACGTTGAGGCTC…	>denovo1179	Bacteria;Firmicutes;Clostridia;Clostridiales;Lachnospiraceae;Blautia	0.16225		0.0579026	0.10567	0.095559		0.00923162	0.0231481	0.0544613										0.0086098	0.0205465	0.0401997				0.0104027						0.00283086				0.00225774								0.16225	0.00482369	0.00396244		0.00469903
CCTAGGGAGGCAGCAGTGGGGAATATTGCACAATGGGGGAAACCCTGATGCAGCGACGCCGCGTGAGTGAAGAAGTATTTCGGTATGTAAAGCTCTATCAGCAGGGAAGAAGATGACGGTACCTGAGTAAGAAGCCCCGGCTAACTACGTGCCAGCAGCCGCGGTAATACGTAGGGGGCAAGCGTTATCCGGATTTACTGGGTGTAAAGGGAGCGTAGACGGTAATGCAAGTCTGGAGGGAAAACCCGGGGCTCAACCCCGGGACTGCTTTGGAAACTGTATAACTGGAGTGCCGGAGAGGTAAGCGGAATTCCTAGTGTAGCGGTGGAATGCGTAGATATTAGGAGGAACACCAGTGGCGAAGGCGGCTTACTGGACGGTAACTGACGTTGAGGCTCG…	>denovo65346	Bacteria;Firmicutes;Clostridia;Clostridiales;Lachnospiraceae;Clostridium XlVa	0.162107		0.00222702	0.00556158								0.00142258	0.00145438				0.00365738		0.0086098	0.0205465	0.00669994				0.0163472																		0.00348924				0.00939805
CCTACGGGTGGCAGCAGTGGGGGATATTGCACAATGGAGGAAACTCTGATGCAGCGACGCCGCGTGAGGGAAGACGGTCTTCGGATTGTAAACCTCTGTCTTTAGGGACGAAAAAATGACGGTACCTAAGGAGGAAGCCACGGCTAACTACGTGCCAGCAGCCGCGGTAATACGTAGGTGGCAAGCGTTGTCCGGAATTACTGGGTGTAAAGGGAGCGTAGACGGCGCGGCAAGTCTGAAGTGAAAGCCCGGGGCTTAACCCCGGGACTGCTTTGGAAACTGCCATGCTGGAGTGCTGGAGAGGTAAGTGGAATTCCTAGTGTAGCGGTGAAATGCGTAGATATTAGGAGGAACACCAGTGGCGAAGGCGGCTTACTGGACAGTAACTGACGTTGAGGC…	>denovo90228	Bacteria;Firmicutes;Clostridia;Clostridiales;Lachnospiraceae	0.162037		0.0334053	0.0194655	0.0251471		0.015386	0.162037	0.0181538										0.00286993						0.00297221																		0.0209355				0.00939805
CCTACGGGTGGCTGCAGTGGGGAATATTGCACAATGGGGGAAACCCTGATGCAGCGACGCCGCGTGAAGGAAGAAGTATTTCGGTATGTAAACTTCTATCAGCAGGGAAGAAGATGACGGTACCTGAGTAAGAAGCACCGGCTAAATACGTGCCAGCAGCCGCGGTAATACGTATGGTGCAAGCGTTATCCGGATTTACTGGGTGTAAAGGGAGCGTAGACGGCGAAGCAAGTCTGAAGTGAAAACCCAGGGCTCAACCCTGGGACTGCTTTGGAAACTGTTTTGCTAGAGTGCTGGAGAGGTAAGTGGAATTCCTAGTGTAGCGGTGAAATGCGTAGATATTAGGAGGAACACCAGTGGCGAAGGCGGCTTACTGGACAGTAACTGACGTTGAGGCTC…	>denovo113245	Bacteria;Firmicutes;Clostridia;Clostridiales;Lachnospiraceae;Clostridium XlVa	0.161958		0.00668107	0.00834237	0.0251471		0.0123088	0.00771605	0.00907688		0.0041731	0.0426773	0.00436313		0.0625301	0.0109691	0.0146295		0.0286993	0.0164372	0.00669994		0.0151941	0.0182721			0.063012	0.0397902	0.0447319		0.00283086	0.0060367	0.0224777		0.00338662	0.00917936	0.00197297		0.00168808	0.00419217	0.00242657		0.0261693	0.00964739	0.0198122
CCTACGGGGGGCAGCAGTGGGGAATATTGGGCAATGGGCGCAAGCCTGACCCAGCAACGCCGCGTGAAGGAAGAAGGCCCTCGGGTTGTAAACTTCTTTTGTCAGGGACGAAGCAAGTGACGGTACCTGACGAATAAGCCACGGCTAACTACGTGCCAGCAGCCGCGGTAATACGTATGGAGCAAGCGTTATCCGGATTTACTGGGTGTAAAGGGTGCGTAGGCGGCAGAGCAAGTCAGATGTGAAAGACCGGGGCTCAACCCCGGGGCTGCATTTGAAACTGTTTTGCTGGAGTCCGGGAGAGGCAGGCGGAATTCCTAGTGTAGCGGTGAAATGCGTAGATATTAGGAGGAACACCAGTGGCGAAGGCGGCCTGCTGGACCGGAACTGACGCTGAGG…	>denovo105010	Bacteria;Firmicutes;Clostridia;Clostridiales;Ruminococcaceae	0.161732		0.00445405	0.00278079			0.00307721				0.00208655		0.00145438		0.02886	0.0219382	0.0475459			0.00410931				0.00304535			0.005251								0.00112887		0.00197297		0.00337615		0.00242657
CCTACGGGTGGCAGCAGTGGGGAATATTGCACAATGGGGGAAACCCTGATGCAGCGACGCCGCGTGAAGGAAGAAGTATCTCGGTATGTAAACTTCTTTTGTCAGGGACGAAGCAAGTGACGGTACCTGACGAATAAGCCACGGCTAACTACGTGCCAGCAGCCGCGGTAATACGTAGGTGGCAAGCGTTATCCGGATTTACTGGGTGTAAAGGGCGTGTAGGCGGGATTGCAAGTCAGATGTGAAAACCACGGGCTCAACCTGTGGCCTGCATTTGAAACTGCAGTTCTTGAGTACTGGAGAGGCAGACGGAATTCCTAGTGTAGCGGTGAAATGCGTAGATATTAGGAGGAACACCAGTGGCGAAGGCGGTCTGCTGGACAGCAACTGACGCTGAGG…	>denovo11768	Bacteria;Firmicutes;Clostridia;Clostridiales;Ruminococcaceae	0.161488		0.0267243	0.0194655			0.0523125	0.0385802	0.0272306		0.0104328	0.00711288	0.0218156		0.0817701	0.0219382	0.0841197		0.0315693	0.0369838	0.0167499		0.0227912	0.0182721	0.0252638		0.073514	0.0383692	0.0421758		0.0283086	0.0241468	0.0256888		0.0135465	0.0252433	0.00986485		0.0101285	0.0146726			0.00697849	0.00723554	0.0118873		0.0328932
CCTACGGGTGGCTGCAGTGGGGAATATTGCACCATGGGGGAAACCCTGATGCAGCGATGCCGCGTGAGGGAAGAAGGTTTTCGGATTGTAAACCTCTGTTTTAAGTGAAGATAATGACGGTAGCTTAAGAGGAAGCCACGGCTACCTACGTGCCAGCAGCCGCGGTAATACGTAGGTGGCAAGCGTTGTCCGGAATTACTGGGTGTAAAGGGAGCGTAGGCGGGGATGCAAGTTGAATGTCAAAGCCAGGGGCTCAACCCCTGATCGCGTTCAAAACTGTATCTCTTGAGTGAAGTAGAGGCAGGCGGAATTCCTAGGGTAGCGGTGAAATGCGTAGATATTAGGAGGAACACCAGTGGCGAAGGCGGCTTACTGGACGGCAACTGACGTTGGGGCTCG…	>denovo41032	Bacteria;Firmicutes;Clostridia;Clostridiales;Ruminococcaceae;Acetanaerobacterium	0.160624			0.00556158	0.0150883							0.0213386							0.00286993								0.005251	0.00426324	0.00383416						0.00903098	0.00458968			0.00337615	0.0125765			0.0296586	0.00723554
CGGGCGGCAGCAGTGGGGAATATTGCACAATGGGGGAAACCCTGATGCAGCGACGCCGCGTGAGCGAAGAAGTATTTCGGTATGTAAAGCTCTATCAGCAGGGAAGAAACTGACGGTACCTGACTAAGAAGCACCGGCTAAATACGTGCCAGCAGCCGCGGTAATACGTATGGTGCAAGCGTTATCCGGATTTACTGGGTGTAAAGGGAGCGTAGACGGCATGGCAAGTCGGGAGTGAAAAACCAGGGCTAAACCTTGGGATTGCTTTGGAAACGGTCAAGCTGGAGTGCCGGAGAGGTAAGCGGAATTCCTAGTGTAGCGGTGAAATGCGTAGATATTAGGAGGAACACCAGTGGCGAAGGCGGCTTACTGGACGGTAACTGACGTTGAGGCTCGAAA…	>denovo113754	Bacteria;Firmicutes;Clostridia;Clostridiales;Lachnospiraceae;Ruminococcus2	0.160577				0.0150883			0.00771605			0.00625965	0.0128032	0.0058175		0.0481	0.0109691	0.0987492		0.00286993	0.00410931			0.0303882		0.014861		0.021004	0.0582643	0.0434538		0.124558	0.00402447	0.0481665		0.00338662	0.0183587	0.00394594		0.00168808	0.00628825	0.00970626		0.00174462	0.00241185			0.00469903
CCTACGGGTGGTAGCAGTGGGGGATATTGCACAATGGAGGAAACTCTGATGCAGCGACGCCGCGTGAAGGAAGAAGTATCTCGGTATGTAAACTTCTATCAGCAGGGAAGAAAATGACGGTACCTGACTAAGAAGCACCGGCTAAATACGTGCCAGCAGCCGCGGTAATACGTATGGTGCAAGCGTTATCCGGATTTACTGGGTGTAAAGGGAGCGTAGACGGATAGGCAAGTCTGGAGTGAAAGCCCGGGACTCAATCCCGGGACTGCTTTGGAAACTGTTTATCTAGAGTGCTGGAGAGGTAAGTGGAATTCCTAGTGTAGCGGTGAAATGCGTAGATATTAGGAGGAACACCAGTGGCGAAGGCGGCTTACTGGACAGTAACTGACGTTGAGGCTC…	>denovo50518	Bacteria;Firmicutes;Clostridia;Clostridiales;Lachnospiraceae	0.160256			0.00556158			0.00923162		0.00907688		0.00208655		0.0174525		0.02405	0.00822684	0.00365738			0.00410931				0.00609069	0.00297221		0.015753	0.0142108	0.00383416		0.0113234	0.0140856	0.0192666		0.0124176	0.00917936	0.00789188		0.00168808				0.00174462	0.00241185			0.00469903
CTACGGGAGGCTGCAGTAGGGAATATTGCACAATGGGGGAAACCCTGATGCAGCGACGCCGCGTGAGCGAAGAAGTATCTCGGTATGTAAAGCTCTATCAGCAGGGAAGAAAATGACGGTACCTGAGTAAGAAGCCCCGGCTAACTACGTGCCAGCAGCCGCGGTAATACGTAGGGGGCAAGCGTTATCCGGATTTACTGGGTGTAAAGGGAGCGTAGACGGCGAGGCAAGTCTGATGTGAAAGGCCGGGGCTCAACCCCGGGACTGCATTGGAAACTGTTTTGCTTGAGTGCCGGAGAGGTAAGCGGAATTCCTAGTGTAGCGGTGAAATGCGTAGATATTAGGAGGAACACCAGTGGCGAAGGCGGCTTACTGGACGGTAGCTGACGTTGAGGCTCA…	>denovo75995	Bacteria;Firmicutes;Clostridia;Clostridiales;Lachnospiraceae	0.160243		0.00890809	0.00278079	0.0653825			0.00771605			0.0041731	0.0981578	0.00290875						0.00573987		0.00669994				0.0014861							0.00201223								0.00209608	0.00121328		0.00348924	0.00482369	0.00396244
CCTACGGGTGGCTGCAGTGAGGAATATTGGTCAATGGCTGTGAGGCTGAACCAGCCAAGTAGCGTGAAGGATGACGGCCCTACGGGTTGTAAACTTCTTTTATGCGGGATTAACGTGAGGTACGTGTACCTTATTGCAGGTACCGCGTGAATAAGCATCGGCTAACTCCGTGCCAGCAGCCGCGGTAATACGGAGGATGCAGGCGTTATCCGGATTTATTGGGTTTAAAGGGAGCGCAGACGGCATGTCAAGTCAGCTGTGAAAGCTCGGGGCTCAACCTTGGAATTGCAGTTGAAACTGGCGTGCTTGAGTTCGGTCGAGGCAGGCGGAATTCGTGGTGTAGCGGTGAAATGCGTAGATATCACGAAGAACCCCGATTGCGAAGGCAGCTTGCCAGGC…	>denovo74185	Bacteria;Bacteroidetes;Bacteroidia;Bacteroidales	0.159556
CCTACGGGTGGCAGCAGTGGGGAATATTGCACAATGGGGGAAACCCTGATGCAGCGACGCCGCGTGAGCGAAGAAGTATTTCGGTATGTAAAGCTCTATCAGCAGGGAAGAAACTGACGGTACCTGACTAAGAAGCACCGGCTAAATACGTGCCAGCAGCCGCGGTAATACGTATGGTGCAAGCGTTATCCGGATTTACTGGGTGTAAAGGGAGCGTAGACGGATTTGCAAGTCTGAAGTGAAAGCCCGGGGCTCAACCCCGGGACTGCTGTGGAAACTGTAGGTCTTGAGTGCTGAGGAGGTGAGTGGACTTCCTAGTGTAGCGGTGAAATGCGTAGATATTAGGAGGAACACCAGTGGCGAAGGCGGCTTACTGGACAGTAACTGACGTTGAGGCTC…	>denovo51655	Bacteria;Firmicutes;Clostridia;Clostridiales;Lachnospiraceae;Ruminococcus2	0.158765		0.00890809	0.108451	0.0251471			0.00771605			0.00208655	0.00426773	0.00145438				0.00365738			0.00410931	0.00334997										0.00283086		0.0064222		0.00112887	0.00458968			0.00168808
CCTACGGGTGGCAGCAGTGGGGGATATTGCACAATGGGGGAAACCCTGATGCAGCAACGCCGCGTGAAGGAAGAAGGTCTTCGGATTGTAAACTTCTGTCCTCAGGGAAGATAATGACGGTACCTGAGGAGGAAGCTCCGGCTAACTACGTGCCAGCAGCCGCGGTAATACGTAGGGGGCAAGCGTTATCCGGATTTACTGGGTGTAAAGGGAGCGTAGACGGCAAGGCAAGTCTGAAGTGAAAGCCCGGGGCTTAACCGCGGGACTGCTTTGGAAACTGTCTGGCTGGAGTGCCGGAGAGGTAAGCGGAATTCCTAGTGTAGCGGTGAAATGCGTAGATATTAGGAGGAACACCAGTGGCGAAGGCGGCTTACTGGACGGTAACTGACGTTGAGGCTC…	>denovo119836	Bacteria;Firmicutes;Clostridia;Clostridiales;Lachnospiraceae	0.158579		0.00222702				0.00615441	0.0154321	0.0272306				0.0058175			0.0356496								0.00304535	0.00445831		0.010502	0.0113686	0.0447319			0.0100612	0.0128444		0.00225774				0.00168808	0.00628825							0.00469903
TCTACGGGGGGCTGCAGTGGGGAATATTGCACAATGGGGGAAACCCTGATGCAGCGACGCCGCGTGAGCGAAGAAGTATTTCGGTATGTAAAGCTCTATCAGCAGGGAAGAAAATGACGGTACCTGACTAAGAAGCACCGGCTAAATACGTGCCAGCAGCCGCGGTAATACGTATGGTGCAAGCGTTATCCGGATTTACTGGGTGTAAAGGGAGCGTAGACGGATGGGCAAGTCTGAAGTGAAAGCCCGGGGCTCAACCCCGGGACTGCTTTGGAAACTGTACGGCTGGAGTGCTGGAGAGGCAAGCGGAATTCCTAGTGTAGCGGGGAAATGCGTAGATATTAGGAGGAACACCAGTGGCGAAGGCGGCTTGCTGGACAGTAACTGACGTTGAGGCTC…	>denovo51774	Bacteria;Firmicutes;Clostridia;Clostridiales;Lachnospiraceae;Ruminococcus2	0.158579			0.00834237	0.0201177		0.00615441	0.00771605			0.00625965	0.00426773	0.0189069			0.00274228	0.00731475		0.00286993										0.00511221		0.00283086		0.0032111		0.00338662	0.00458968	0.00789188		0.00337615	0.00209608			0.00697849	0.00482369	0.00396244
CCTACGGGGGGCTGCAGTGGGGAATATTGCACAATGGGGGAAACCCTGATGCAGCGACGCCGCGTGAAGGAAGAAGTATCTCGGTATGTAAACTTCTATCAGCAGGGAAGAAAGTGACGGTACCTGACTAAGAAGCCCCGGCTAATTACGTGCCAGCAGCCGCGGTAATACGTAAGGGGCAAGCGTTATCCGGATTTACTGGGTGTAAAGGGTGCGTAGGCGGATCTGCAAGTCAGTAGTGAAATCCCAGGGCTTAACCCTGGAACTGCTATTGAAACTGTGGGTCTTGAGTGAGGTAGAGGCAGGCGGAATTCCCGGTGTAGCGGTGAAATGCGTAGAGATCGGGAGGAACACCAGTGGCGAAGGCGGCCTGCTGGGCCTTAACTGACGCTGAGGCAC…	>denovo66433	Bacteria;Firmicutes;Clostridia;Clostridiales;Lachnospiraceae	0.158267		0.00222702	0.00278079	0.00502942		0.00615441	0.00771605	0.00907688				0.00145438			0.00822684				0.00410931	0.00334997		0.00759705	0.00913604	0.00594442		0.042008	0.0653697	0.0754051		0.00283086	0.0100612	0.0192666												0.00396244		0.00939805
CCTACGGGGGGCAGCAGTGGGGAATATTGCACTATGGGGGAAACCCTGATGCAGCGACGCCGCGTGAGTGAAGAAGTATTTCGGTATGTAAAGCTCTATCAGCAGGGAAGAAAATGACGGTACCTGACTAAGAAGCCCCGGCTAACTACGTGCCAGCAGCCGCGGTAATACGTAGGGGGCAAGCGTTATCCGGATTTACTGGGTGTAAAGGGAGCGTAGACGGTAATGCAAGTCTGGAGTGAAACCCCGGGGCCCAACCCCGGGACTGCTTTGGAAACTGTATAACTGGAGTGCCGGAGATGTAAGAGGAATTCCTAGTGTAGCGGTGAAATGCGTAGATAGTAGGAGGAACACCAGAGGCGAAGGCGGCTTACTGGACGGTAACTGACGTTGAGGCTC…	>denovo65567	Bacteria;Firmicutes;Clostridia;Clostridiales;Lachnospiraceae	0.158055																			0.00410931															0.00112887		0.00197297				0.00121328			0.00241185			0.00469903
CCTACGGGGGGCAGCAGTGAGGGATATTGGTCAATGGGGGAAACCCTGAACCAGCAACGCCGCGTGAGGGATGACGGCCTTCGGGTTGTAAACCTCTGTCCTCTGTGAAGATAATGACGGTAGCAGAGGAGGAAGCTCCGGCTAACTACGTGCCAGCAGCCGCGGTAATACGTAGGGAGCGAGCGTTGTCCGGATTTACTGGGTGTAAAGGGTGCGTAGGCGGCCATGCAAGTCAGGTGTGAAAACCCGGGGCTTAACCCCGGGACTGCATTTGAAACTGTGTGGCTTGAGTGAAGTAGAGGCAGGCGGAATTCCCGGTGTAGCGGTGAAATGCGTAGAGATCGGGAGGAACACCAGTGGCGAAGGCGGCCTGCTGGGCTTTAACTGACGCTGAGGCAC…	>denovo88267	Bacteria;Firmicutes;Clostridia;Clostridiales;Ruminococcaceae;Clostridium IV	0.155972						0.00307721	0.0385802	0.0363075						0.01443				0.00286993		0.00334997				0.0118888		0.015753	0.0298427	0.0115025										0.00168808								0.00469903
CCTACGGGAGGCAGCAGTGGGGGATATTGCACAATGGGGGAAACCCTGATGCAGCGACGCCGCGTGAAGGAAGAAGGCCTTCGGGTTGTAAACTTCTGTCGTACGGGACGATAATGACGGTACCGTACAAGAAAGCCACGGCTAACTACGTGCCAGCAGCCGCGGTAAAACGTAGGTGGCAAGCGTTGTCCGGAATTACTGGGTGTAAAGGGAGCGCAGGCGGGTATGCAAGTTGGGAGTGAAATACATGGGCTCAACCCATGAACTGCTCTCAAAACTGTGTATCTTGAGTAGTGCAGAGGTAGGCGGAATTCCCGGTGTAGCGGTGGAATGCGTAGATATCGGGAGGAACACCAGTGGCGAAGGCGGCCTACTGGGCACCAACTGACGCTGAGGCTC…	>denovo7882	Bacteria;Firmicutes;Clostridia;Clostridiales;Ruminococcaceae;Faecalibacterium	0.155912		0.00445405	0.013904	0.155912				0.0181538			0.00142258								0.00410931	0.00334997										0.00283086	0.00201223	0.0032111
CCTACGGGAGGCAGCAGTGGGGAATATTGCACAATGGGGGGAACCCTGATGCAGCGATGCCGCGTGGAGGAAGAAGGTTTTCGGATTGTAAACTCCTGTCTTAAAGGACGATAATGACGGTACTTTAGGAGGAAGCTCCGGCTAACTACGTGCCAGCAGCCGCGGTAATACGTAGGGAGCGAGCGTTGTCCGGAATTACTGGGTGTAAAGGGAGCGTAGGCGGGACTGCAAGTCAGATGTGAAATGCCGGGGCTTAACCCCGGAGCTGCATTTGAAACTGTGGTTCTTGAGTGAAGTAGAGGCAAGCGGAATTCCTGGTGTAGCGGTGAAATGCGTAGATATCAGGAGGAACACCGGTGGCGAAGGCGGCTTGCTGGGCTTTTACTGACGCTGAGGCTC…	>denovo83831	Bacteria;Firmicutes;Clostridia;Clostridiales;Ruminococcaceae;Ruminococcus	0.155729
CCTACGGGTGGCTGCAGTGGGGAATATTGCACAATGGGGGAAACCCTGATGCAGCGACGCCGCGTGAGTGAAGAAGTATTTCGGTATGTAAAGCTCTATCAGCAGGGAAGAAAATGACGGTACCTGACTAAGAAGCCCCGGCTAACTACGTGCCAGCAGCCGCGGTAATACGTAGGGGGCAAGCGTTATCCGGATTTACTGGGTGTAAAGGGAGCGTAGGCGGCATGGTAAGTAAGATGTGAAAGCCCGCAGCTTAACTGCGAGGATTGCATTTTAAACTATCAAGCTAGAGTACAGGAGAGGAAAGCGGAATTCCTAGTGTAGCGGTGAAATGCGTAGATATTAGGAAGAACACCAGTGGCGAAGGCGGCTTTCTGGACTGAAACTGACGCTGAGGCT…	>denovo109060	Bacteria;Firmicutes;Clostridia;Clostridiales;Lachnospiraceae;Clostridium XlVb	0.155703		0.0178162	0.0583966	0.035206		0.00615441	0.0540123	0.0272306		0.00208655	0.00284515	0.00145438		0.04329		0.00365738		0.00573987	0.0287652	0.0167499			0.00913604	0.00297221		0.005251	0.0198951	0.0805174		0.00566171	0.0060367	0.0064222		0.00451549	0.00229484	0.00197297		0.00675231	0.00419217			0.00697849	0.0120592	0.0158497		0.00939805
CCTACGGGGGGCTGCAGTGGGGAATATTGCACAATGGGGGAAACCCTGATGCAGCGACGCCGCGTGAGTGAAGAAGTATTTCGGTATGTAAAGCTCTATCAGCAGGGAAGAAAATGACGGTACCTGACTAAGAAGCCCCGGCTAACTACGTGCCAGCAGCCGCGGTAATACGTAGGGGGCAAGCGTTATCCGGATTTACTGGGTGTAAAGGGAGCGTAGACGGCAAGGCAAGTCTGAAGTGAAATCCCGGGGCTTAACCGCGGGACTGCTTTGGAAAATGTTTAACTGGAGTGCAGGAGAGGTAAGCGGAATTCCTAGTGTAGCGGTGAAATGAGTAGGTATTAGGAGGAACACCAGTGGCGAAGGCGGCTTACTGGACTGTAACTGACGTTGAGGCTC…	>denovo66293	Bacteria;Firmicutes;Clostridia;Clostridiales;Lachnospiraceae;Clostridium XlVa	0.155703		0.00222702	0.00556158	0.0100588		0.0123088				0.0041731		0.00436313		0.00481	0.00822684							0.0151941	0.0152267	0.00297221			0.00142108	0.00894637		0.00283086	0.00201223	0.00963329		0.00112887	0.00688452	0.00197297		0.00337615	0.0104804			0.00348924		0.00792487		0.00469903
CCTACGGGTGGCAGCAGTGGGGAATATTGCATAATGGGGGAAACCCTGATGCAGCGACGCCGCGTGAGCGAAGAAGTATTTCGGTATGTAAAGCTCTATCAGCAGGGAAGAAACTGACGGTACCTGACTAAGAAGCAACGGCTAAATACGTGCCAGCAGCCGCGGTAATACGTATGGCGCAAGCGTTATCCGGATTTACTGGGTGTAAAGGGAGCGTAGACGGAGCAGCAAGTCTGGAGTTAAAAACCGGGGCTCAACCCCGGGACTGCTTTGGAAACTGTTGTTCTAGAGTGATGGAGAGGTAAGTGGAATTCCTAGTGTAGCGGTGAAATGCGTAGATATTAGGAGGAACACCAGTGGCGAAGGCGGCTTACTGGACAGTAACTGACGTTGAGGCTC…	>denovo70063	Bacteria;Firmicutes;Clostridia;Clostridiales;Lachnospiraceae;Ruminococcus2	0.155477										0.0208655	0.0113806	0.0247244		0.01443	0.019196	0.0658328						0.00759705	0.0213174	0.00445831		0.015753	0.0198951	0.0281172		0.00566171	0.00201223	0.0064222		0.0293507	0.00688452	0.00986485		0.00337615	0.00419217							0.00939805
CCTACGGGAGGCAGCAGTGGGGAATATTGCACAATGGGGGAAACCCTGATGCAGCGATGCCGCGTGAGGGAAGAAGGTTTTCGGATTGTAAACCTCTGTTTTAAGTGAAGATAATGACGGTAGCTTAAGAGGAAGCCACGGCTAACTACGTGCCAGCAGCCGCGGTAATACGTAGGTGGCAAGCGTTATCCGGATTTACTGGGTGTAAAGGGCGTGTAGGCGGGATTGCAAGTCAGATGTGAAAACCACGGGCTCAACCTGTGGCCTGCATTTGAAACTGCAGTTCTTGAGTACTGGAGAGGCAGACGGAATTCCTAGTGTAGCGGTGAAATGCGTAGATATTAGGAGGAACACCAGTGGCGAAGGCGGTCTGCTGGACAGCAACTGACGCTGAGGCGC…	>denovo59855	Bacteria;Firmicutes;Clostridia;Clostridiales;Ruminococcaceae	0.154888				0.0150883		0.015386					0.00853546												0.00304535				0.00284216	0.00639027				0.0032111		0.00338662				0.00506423	0.00209608	0.00121328		0.00697849
TCTACGGGCGGCAGCAGTGGGGAATATTGCACAATGGGGGAAACTCTGATGCAGCGACGCCGCGTGAGCGAAGAAGTATTTCGGTATGTAAAGCTCTATCAGCAGGGAAGAGAATGACGGTACCTGAGTAAGAAGCCCCGGCTAACTACGTGCCAGCAGCCGCGGTAATACGTAGGGGGCAAGCGTTATCCGGATTTACTGGGTGTAAAGGGAGCGTAGACGGCAAAGCAAGTCTGAAGTGAACGCCCGGCGCTCAACCCCGGGACTGCTTTGGAAACTGTTCTGCTAGAGTGCTGGAGAGGTAAGCGGAATTCCTAGTGTAGCGGTGAAATGCGTAGATATTAGGAGGAACAACAGTGGCGAAGGCGGCTTACTGGACAGTAACTGACGTTGAGGCTC…	>denovo59057	Bacteria;Firmicutes;Clostridia;Clostridiales;Lachnospiraceae	0.154688		0.0378594	0.0222463	0.00502942		0.0307721	0.0154321	0.00907688		0.0166924	0.0142258	0.0334507		0.00962001	0.0219382	0.00731475		0.0114797	0.00821862	0.00334997		0.0455823	0.0456802	0.00445831		0.063012	0.0341059	0.0255611		0.00566171		0.0449554		0.00451549	0.0275381	0.0118378		0.00675231	0.00838434	0.00606642		0.00348924	0.0120592	0.0277371		0.0140971
CCTACGGGGGGCTGCAGTGGGGAATATTGCACAATGGGGGAAACCCTGATGCAGCGACGCCGCGTGAGCGAAGAAGTATCTCGGTATGTAAAGCTCTATCAGCAGGGAAGAAGATGACGGTACCTGACTAAGAAGCACCTGCTAAATACGTGCCAGCAGCCGCGGTAATACGTATGGTGCAAGCGTTATCCGGATTTACTGGGTGTAAAGGGAGCGTAGACGGAGAAGCAAGTCTGGAGTGAAAGCCCGGGGCTCAACCCCGGGACTGCTTTGGAAACTGTTTGTCTAGAGTGCCGGAGAGGTAAGCGGAATTCCTAGTGTAGCGGTGAAATGCGTAGATATTAGGGGGAGCACAAGTGGCGAAGGCGGCTTACTGGACGGTAACTGACGTTGAGGCTC…	>denovo86497	Bacteria;Firmicutes;Clostridia;Clostridiales;Lachnospiraceae	0.15456		0.00222702								0.100154	0.00142258	0.00436313		0.01924	0.0466188	0.0402311		0.00286993					0.00304535			0.010502	0.00284216	0.00639027		0.00566171	0.00201223			0.00451549	0.00688452	0.0138108		0.00844039	0.0272491	0.0461048		0.0575725	0.00241185
CCTACGGGTGGCAGCAGTGAGGGATATTGGTCAATGGGGGAAACCCTGAACCAGCAACGCCGCGTGAGGGATGACGGTCTTCGGATTGTAAACCTCTGTCCTCTGTGAAGATAATGACGGTAGCAGAGGAGGAAGCTCCGGCTAACTACGTGCCAGCAGCCGCGGTACTACGTAGGGAGCAAGCGTTGTCCGGATTTACTGGGTGTAAAGGGTGCGTAGGCGGGTATGCAAGTTGGGAGTGAAATACATGGGCTCAACCCATGAACTGCTCTCAAAACTGTGTATCGTGAGTAGTGCAGAGGTAGGCGGAATTCCCGGTGTAGCGGTGGAATGCGTAGATATCGGGAGGAACACCAGTGGCGAAGGCGGCCTACTGGGCACCAACTGACGCTGAGGCTC…	>denovo84492	Bacteria;Firmicutes;Clostridia;Clostridiales;Ruminococcaceae;Faecalibacterium	0.154307		0.0378594	0.00278079	0.0150883		0.00307721	0.00771605	0.154307												0.00334997
CCTACGGGGGGCTGCAGTAGGGAATCTTCCACAATGGACGCAAGTCTGATGGAGCAACGCCGCGTGAGTGAAGAAGTATTTCGGTATGTAAAGCTCTATCAGCAGGGAAGAAGATGACGGTACCTGAGTAAGAAGCCCCGGCTAACTACGTGCCAGCAGCCGCGGTAATACGTAGGGGGCAAGCGTTATCCGGATTTACTGGGTGTAAAGGGAGCGTAGACGGTGAAGCAAGTCTGGAGTGAAAACCCGGGGCTTAACCCCGGGATTGCTTTGGAAACTGTTTAACTGGAGTGCAGGAGAGGTAAGCGGAATTCCTAGTGTAGCGGTGAAATGCGTAGATATTAGGAGGAACACCAGTGGCGAAGGCGGCTTACTGGACTGTAACTGACGTTGAGGCTC…	>denovo2457	Bacteria;Firmicutes;Clostridia;Clostridiales;Lachnospiraceae;Clostridium XlVa	0.154099		0.0267243	0.0222463	0.00502942		0.0492353	0.0617284	0.0363075				0.00145438			0.0137114	0.0146295		0.0315693		0.154099		0.0151941	0.00609069	0.0520137		0.005251	0.00142108	0.0191708		0.00566171	0.106648	0.0513776										0.0209355	0.00241185	0.0435868		0.0187961
CCTACGGGAGGCAGCAGTGGGGAATATTGCACAATGGGGGAAACCCTGATGCAGCGACGCCGCGTGAGCGAAGAAGTATCTCGGTATGTAAAGCTCTATCAGCAGGGAAGAAAATGACGGTACCTGACTAAGAAGCACCGGCTAAATACGTGCCAGCAGCCGCGGTAATACGTATGGTGCAAGCGTTATCCGGATTTACTGGGTGTAAAGGGAGTGTAGACGGCGATGCAAGTCTGAAGTGAAAGCCCGGTGCTCAACATCGGGACTGCTTTGGAAACTGTATAGCTGGAGTGCCGGAGAGGTAAGCGGAATTCCTAGTGTAGCGGTGAAATGCGTAGATATTAGGAAGAACACCAGTGGCGAAGGCGGCTTACTGGACGGTAACTGACGTTGAGGCTC…	>denovo111479	Bacteria;Firmicutes;Clostridia;Clostridiales;Lachnospiraceae	0.154002		0.00445405	0.0111232	0.0100588			0.00771605				0.00284515				0.00822684			0.00573987	0.00410931	0.00334997		0.0227912	0.0121814	0.0104027						0.00283086						0.00197297						0.0366371	0.0168829	0.0237746		0.136272
CCTACGGGGGGCAGCAGTGGGGAATATTGCACAATGGGGGGAACCCTGATGCAGCGACGCCGCGTGAGGGAAGAAGGTTTTCGGATTGTAAACCTCTGTCCTTGGTGACGATAATGACGGTAGCCAAGGAGGAAGCCACGGCTAACTACGTGCCAGCAGCCGCGGTAATACGTAGGTGGCAAGCGTTGTCCGGAATTACTGGGTGTAAAGGGAGCGTAGACGGTGAAGCAAGTCTGGAGTGAAAACCCGGGGCTTAACCCCGGGATTGCTTTGGAAACTGTTTAACTGGAGTGCAGGAGAGGTAAGCGGAATTCCTAGTGTAGCGGTGAAATGCGTAGATATTAGGAGGAACACCAGTGGCGAAGGCGGCTTACTGGACTGTAACTGACGTTGAGGCTC…	>denovo97571	Bacteria;Firmicutes;Clostridia;Clostridiales;Lachnospiraceae	0.153814		0.0133621	0.0945469	0.0150883		0.00307721		0.00907688							0.00822684			0.0200895	0.0164372	0.0100499			0.00913604	0.00445831			0.00852648	0.00255611		0.00283086	0.0060367	0.0128444										0.0662956	0.0410014	0.0158497		0.00939805
CCTACGGGGGGCTGCAGTGGGGAATATTGCACAATGGGGGAAACCCTGATGCAGCGACGCCGCGTGAGCGAAGAAGTATTTCGGTATGTAAAGCTCTATCAGCAGGGAAGAAACTGACGGTACCTGACTAAGAAGCACCGGCTAAATACGTGCCAGCAGCCGCGGTAATACGTATGGTGCAAGCGTTATCCGGATTTACTGGGTGTAAAGGGAGCGTAGACGGATAGGCAAGTCTGGAGTGAAAGCCCGGGGCTCAACCCCGGGACTGCTTTGGAAACTGTTTATCTAGAGTGCTGGAGAGGTAAGTGGAATTCCTAGTGTAGCGGTGAAATGCGTAGATATTAGGAGGAACACCAGTGGCGAAGGCAGCTCACTAGACTGTTACTGACACTGATGCTC…	>denovo6871	Bacteria;Firmicutes;Clostridia;Clostridiales;Lachnospiraceae;Ruminococcus2	0.153563																																											0.00241185
CCTACGGGAGGCTGCAGTAGGGAATATTGCACAATGGGGGAAACCCTGATGCAGCGACGCCGCGTGAGCGAAGAAGTATCTCGGTATGTAAAGCTCTATCAGCAGGGAAGAAGATGACGGTACCTGACTAGGAAGCACCGGCTAAATACGTGCCAGCAGCCGCGGTAATACGTATGGTGCAAGCGTTATCCGGATTTACTGGGTGTAAAGGGAGCGTAGACGGAAGAGCAAGTCTGGAGTGAAAGCCCGGGGCTCACCCCCGGGACTGCTTTGGAAACTGTGTATCGAGAGTGCCGGAGAGGCAAGCGGAATTCCTAGTGGAGCGGAGAAATGCGTAGATATTAGGAGGAACAACAGTGGCGAAGGCGGCTTGCTGGACGGTAACTGACGTTGAGGCTC…	>denovo73455	Bacteria;Firmicutes;Clostridia;Clostridiales;Lachnospiraceae	0.153312			0.00278079
CCTACGGGCGGCTGCAGTGGGGAATATTGCACAATGGGGGAAACCCTGACCCAGCAACGCCGCGTGAAGGAAGAAGGCCCTCGGGTTGTAAACTTCTTTTGTCAGGGACGAAGCAAGTGACGGTACCTGACGAATAAGCCACGGCTAACTACGTGCCAGCAGCCGCGGTAATACGTAGGTGGCAAGCGTTATCCGGATTTACTGGGTGTAAAGGGCGTGTAGGCGGGATTGCAAGTCAGATGTGAAAACTGGGGGCTCAACCTCCAGCCTGCATTTGAAACTGTAGTTCTTGAGTGCTGGAGAGGCAATCGGAATTCCGTGTGTAGCGGTGAAATGCGTAGATATACGGAGGAACACCAGTGGCGAAGGCGGATTGCTGGACAGTAACTGACGCTGAGG…	>denovo52667	Bacteria;Firmicutes;Clostridia;Clostridiales;Ruminococcaceae;Flavonifractor	0.151814						0.0123088	0.00771605			0.0041731	0.00284515	0.0058175		0.0673401	0.0356496	0.0475459		0.00286993	0.00821862				0.0426348	0.0104027		0.073514	0.0227373	0.0166147		0.0141543	0.0120734	0.0256888		0.00225774	0.00229484	0.00197297		0.00675231		0.00606642		0.00174462	0.00241185
CCTACGGGTGGCAGCAGTGAGGGATATTGGTCAATGGGGGAAACCCTGAACCAGCAACGCCGCGTGAGGGATGACGGCCTTCGGGTTGTAAACCTCTGTCCTCTGTGAAGATAATGACGGTAGCAGAGGAGGAAGCTCCGGCTAACTACGTGCCAGCAGCCGCGGTGATACGTAGGTGGCAAGCGTTGTCCGGAATTACTGGGTGTAAAGGGAGCGCAGGCGGGAGAGCAAGTCAGCTGTGAAAACCACGGGCTTAACCTGTGGACTGCAGTTGAAACTGTTCTTCTTGAGTGAAGTAGAGGTAAGCGGAATTCCGAGTGTAGCGGTGAAATGCGTAGAGATTCGGAGGAACACCAGTGGCGAAGGCGGCTTACTGGGCTTTAACTGACGCTGAGGCTC…	>denovo127017	Bacteria;Firmicutes;Clostridia;Clostridiales;Ruminococcaceae	0.150708		0.0155892	0.00278079	0.0100588				0.0272306						0.00481										0.0014861		0.005251	0.0284216	0.0127805
CCTACGGGTGGCAGCAGTCGGGAATATTGCGCAATGGAGGAAACTCTGACGCAGTGACGCCGTGTATGGGAAGAAGGTTTTCGGATTGTAAACCATTTTAGACAAGGAAGAAAGAAGACAGTACTTGTAGAATAAGCTCCGGCTAACTACGTGCCAGCAGCCGCGGTAATACGTAGGGAGCAAGCGTTATCCGGATTTATTGGGTGTAAAGGGTGCGTAGACGGGAAATCAAGTTGGTTGTGAAATCCCTCGGCTTAACTGAGGAACTGCAACCAAAACTAATTTTCTTGAGTGCTGGAGAGGGAAGTGGAATTCCTAGTGTAGCGGTGAAATGCGTAGATATTAGGAGGAACACCGGTGGCGAAGGCGACTTTCAGGACAGTAACTGACGTTGAGGCA…	>denovo19374	Bacteria;Firmicutes;Clostridia;Clostridiales	0.150682			0.00556158																																							0.00174462
CCTACGGGTGGCTGCAGTGGGGAATATTGCACAATGGGGGAAACCCTGATGCAGCGACGCCGCGTGAAGGAAGAAGTATCTCGGTATGTAAACTTCTATCAGCAGGGAAGAAAATGACGGTACCTGACTAAGAAGCCCCGGCTAACTACGTGCCAGCGGCCGCGGTAATACGTAGGGGGCAAGCGTTATCCGGATTTACTGGGTGTAAAGGGAGCGTAGGCGGATAGGCAAGTCTGAAGTGAAAGCCCGGGGGGCAACCCCGGGACTGCTTTGGAAACTGTTTATCTAGAGTGCTGGAGAGGTAAGTGGAATTCCTAGTGTAGCGGTGAAATGCGTAGATATTAGGAGGAACACCAGTGGCGAAGGCGGCTTACTGGACAGTAACTGACGTGGAGGCTC…	>denovo116661	Bacteria;Firmicutes;Clostridia;Clostridiales;Lachnospiraceae;Coprococcus	0.15024		0.00222702	0.00834237	0.0150883		0.0461581	0.00771605	0.0453844		0.00625965	0.00426773	0.00872626		0.02405	0.00822684			0.0200895	0.0123279	0.0100499			0.00913604	0.00891663		0.005251		0.00383416		0.00849257	0.00804894	0.0032111		0.00451549	0.013769	0.00789188		0.00337615	0.00209608	0.00121328			0.00723554	0.00792487		0.00939805
TCTACGGGTGGCAGCAGTGGGGAATATTGCACAATGGGGGAAACCCTGATGCAGCGACGCCGCGTGAAGGAAGAAGTATCTCGGTATGTAAACTTCTATCAGCAGGGAAGAAAATGACGGTACCTGACTCAGAAGCCCCGGCTAACTACGTGCCAGCAGCCGCGGTAATACGTAGGGGGCAAGCGTTATCCGGATTTACTGGGTGTAAAGGGAGCGTAGACGGAAGGGCAAGTCTGGAGTGAAAGCCCGGGGCTCAACCCCGAGACTGCTTTGGAAACTGGTGTTCTAGAGTGCTAGAGAGGTAAGTGGAATTCCTAGTGTAGCGGTGAAATGCGTAGATATTAGGAGGAACACCAGTGGCGAAGGCGGCTTACTGGACAGTAACTGACGTTGAGGCTC…	>denovo72554	Bacteria;Firmicutes;Clostridia;Clostridiales;Lachnospiraceae	0.15024						0.00307721		0.0363075		0.0146059	0.0227612	0.0159981		0.03367	0.019196	0.0365738		0.0086098	0.00821862	0.00334997		0.0151941	0.0121814	0.00297221		0.005251	0.0213162	0.00766832		0.00566171	0.00201223	0.0128444		0.0169331	0.0206536	0.0217027		0.00506423	0.00419217	0.00242657				0.00396244
CCTACGGGTGGCTGCAGTGGGGAATATTGCACAATGGGGGAAACCCTGATGCAGCGACGCCGCGTGAGTGAAGAAGTATTTCGGTATGTAAAGCTCTATCAGCAGGGAAGAAAATGACGGTACCTGACTAAGAAGCCCCGGCTAACTACGTGCCAGCAGCCGCGGTAATACGTAGGGGGCAAGCGTTATCCGGATTTACTGGGTGTAAAGGGAGCGTAGACGGCAAGGCAAGTCTGAAGTGAAAGCCCGGGGCTTAACCGCGGGACTGCGTTGGAAACTGTTTATCTAGAGGGCTGGAGAGGTAAGTGGAATTCCTCGTGTAGTGGTGAAATGCGTAGATATTAGGAGGAACACCAGTGGCGAAGGCGGCTTACTGGACAGTAACAGACGTTGAGGCTC…	>denovo76296	Bacteria;Firmicutes;Clostridia;Clostridiales;Lachnospiraceae	0.15024		0.00222702				0.00307721				0.0083462		0.0145438		0.01443	0.00822684	0.00365738							0.0121814					0.00127805		0.00566171	0.00402447	0.00963329		0.0079021	0.0183587	0.00394594		0.00168808	0.00209608					0.00396244
CCTACGGGTGGCTGCAGTGGGGAATATTGCACAATGGGGGAGACCCTGATGCAGCGACGCCGCGTGAAGGAAGAAGTATCTCGGTATGTAAACTTCTATCAGCAGGGAAGAAAATGACGGTACCTGACTAAGAAGCCCCGGCTAACTACGTGCCATCAGCCGCGGTAATACGTAGGGGGCAAGCGTTATCCGGATTTACTGGGTGTAAAGGGCGCGTAGACGGCGAAGCAAGTCTGAAGTGAAAACCCAGGGCTCAACCCTGGGACTGCTTTGGAAACTGTTTTGCTAGAGTGCTGGAGAGGTAAGTGGAATTACTAGTGTAGCGGTGAAATGCATAGAGATTAGGAGGAACACCAGTGGCGAAGGAGGCTTACTGGACAGTAACTGACGTTGAGGCTC…	>denovo132311	Bacteria;Firmicutes;Clostridia;Clostridiales;Lachnospiraceae	0.149961											0.00142258			0.01443		0.00365738		0.00573987								0.005251	0.00142108	0.00511221		0.00283086				0.00338662	0.00917936	0.00197297										0.00469903
CCTACGGGTGGCAGCAGTGGGGAATATTGGGCAATGGGCGCAAGCCTGACCCAGCAACGCCGCGTGAAGGATGAAGGCTTTCGGGTTGTAAACTTCTTTTATCAGGGACGAAACAAATGACGGTACCTGATGAATAAGCCACGGCTAACTACGTGCCAGCAGCCGCGGTAATACGTAGGTGGCAAGCGTTATCCGGATTTACTGGGTGTAAAGGGCGTGTAGGCGGGACTGCAAGTCAGCTGTGAAAACTATGGGCTCAACCCATAGCCTGCATTTGAAACTGTAGTTCTTGAGTGCTGGAGAGGCAATCGGAATTCCGGGTGTAGCGGTGAAATGCATAGATATACGGAGGAACACCAGTGGCGAAGGCGGCTTACTGGACTGAAACTGACACTGAGG…	>denovo21946	Bacteria;Firmicutes;Clostridia;Clostridiales;Ruminococcaceae;Pseudoflavonifractor	0.149775		0.0133621	0.0111232			0.0923162												0.0086098	0.0164372					0.0014861
CCTACGGGTGGCTGCAGTGGGGAATATTGCACAATGGGGGAAACCCTGATGCAGCGACGCCGCGTGAGTGAAGAAGTATTTCGGTATGTAAAGCTCTATCAGCAGGGAAGAGAATGACGGTACCTGAGTAAGAAGCCCCGGCTAACTACGTGCCAGCAGCCGCGGTAATACGTAGGGGTCAAGCGTTATCCGGATTTACTGGGTGTAAAGGGAGCGTAGACGGCAAAGCAAGTCTGAAGTGAAAGCCCGGGGCTCAACCCCGGGACTGCTTTGGAAACTGTTCTGCTAGAGTGCTGGAGAGGTAAGCGGAATTCCTAGTGTAGCGGTGAAATGCGTAGAGATCTGGAGGAATACCGGTGGCGAAGGCGGCTTACTGGACAGTAACTGACGTTGAGGCTC…	>denovo128446	Bacteria;Firmicutes;Clostridia;Clostridiales;Lachnospiraceae	0.149049		0.00445405	0.0111232			0.0400037	0.00771605	0.00907688		0.0292117	0.00569031	0.00727188		0.01443	0.00822684	0.00731475		0.0200895	0.00821862	0.00669994		0.0531794	0.0426348	0.00594442		0.042008	0.0156319	0.024283		0.00849257	0.00201223	0.0192666		0.00564436	0.0183587	0.0157838		0.00506423	0.0104804	0.00606642		0.00872311	0.0120592	0.0118873		0.00469903
CCTACGGGTGGCTGCAGTGGGGGATATTGCACAATGGGGGGAACCCTGATGCAGCGACGCCGTGTGAGGGAAGACGGTCTTCGGATTGTAAACCTCTGTCTTTAGGGACGAAAAAATGACGGTACCTAAGGAGGAAGCCACGGCTAACTACGTGCCAGCAGCCGCGGTAATACGTAGGTGGCAAGCGTTGTCCGGAATTACTGGGTGTAAAGGGAGCGTAGGCGGGGAGACACGTTGAATGTTTAAACTATCGGCTTAACCGGTAGTCGCGTTCAAAACTGTTTTTCTTGAGTGAAGTAGAGGCAGGCGGAATTCCTAGTGTAGCGGTGAAATGCGTAGATATTAGGAGGAACACCAGTGGCGAAGGCGGCCTGCTGGGCTTTAACTGACGTTGAGGCT…	>denovo100552	Bacteria;Firmicutes;Clostridia;Clostridiales;Ruminococcaceae;Anaerotruncus	0.147733																											0.0071054	0.00511221
CCTACGGGTGGCTGCAGTGGGGAATATTGGGCAATGGGCGCAAGCCTGACCCAGCAACGCCGCGTGAAGGATGAAGGCTTTCGGGTTGTAAACTTCTTTTATCAGGGACGAAACAAATGACGGTACCTGATGAATAAGCCACGGCTAACTACGTGCCAGCAGCCGCGGTAATACGTAGGTGGCAAGCGTTATCCGGATTTACTGGGTGTAAAGGGCGTGTAGGCGGGACTGAAAGTCAGATGTGAAAACTATGGGCTAAACCCATAGCCTGCATTTGAATCTGTAGTTCTTGCGTGCTGGATAGGCAATCGGAATTCCGTGTGTAGCGGTGAAATGCGTAGATATACGGAGGGACACCAGTGGCGAAGGCGGATTGCTGGACAGTAACTGACGCTGAGG…	>denovo90596	Bacteria;Firmicutes;Clostridia;Clostridiales;Ruminococcaceae;Pseudoflavonifractor	0.147706		0.00668107	0.0111232	0.0150883		0.147706												0.00573987	0.0164372	0.00334997
CCTACGGGGGGCAGCAGTGGGGAATATTGCACAATGGGGGAAACCCTGATGCAGCGACGCCGCGTGAGTGAAGAAGTATTTCGGTATGTAAAGCTCTATCAGCAGGGAAGAAGAAAGACGGTACCTGACTAAGAAGCCCCGGCTAACTACGTGCCAGCAGCCGCGGTAATACGTAGGGGGCAAGCGTTATCCGGATTTACTGGGTGTAAAGGGAGCGTAGACGGCGAGGCAAGTCTGAAGTGAAAGCCCGGGGCTCAACCGCGGGACTGCTTTGGAAACTGTTTTGCTAGAGTGCTGGAGGAGTAAGTGGAATTCCTAGTGGAGCGGTGAAATGCGTAGATATTAGGAGGAACACCAGGGGCGAAGGCGGCTTACTGGACGGTAACTGACGTTGAGGCT…	>denovo35454	Bacteria;Firmicutes;Clostridia;Clostridiales;Lachnospiraceae;Clostridium XlVa	0.146978										0.0083462	0.00569031	0.00872626		0.02886	0.019196	0.0109721											0.00994756	0.00255611						0.00677323	0.00917936	0.00591891			0.00838434
CCTACGGGTGGCTGCAGTGGGGAATATTGCACAATGGGGGAAACCCTGATGCAGCGACGCCGCGTGAGCGAAGAAGTATTTCGGTATGTAAAGCTCTATCAGCAGGGAAGAAAATGACGGTACCTGACTAAGAAGCACCGGCTAAATACGTGCCAGCAGCCGCGGTAATACGTATGGTGCAAGCGTTATCCGGATTTACTGGGTGTAAAGGGAGCGTAGCCGGAGAGGCAAGTCTGGAGTGAAAACCCGGGGCTCAACCCCGGGACTGATTTGGAAACTGGTTATCTGGAGTACCGGAGAGGTAAGTGGAATTCCTAGGGTAGCGGTGAAATGCGTAGATATTAGGAGGAACACCAGTGGCGAAGGCGGCTTACTGGACGGTAACTGACGTTGAGGCTC…	>denovo27219	Bacteria;Firmicutes;Clostridia;Clostridiales;Lachnospiraceae;Ruminococcus2	0.145886		0.00222702	0.00278079															0.00286993	0.00410931									0.00127805														0.00348924	0.00241185			0.00469903
CCTACGGGTGGCTGCAGTGGGGAATATTGCACAATGGGGGAAACCCTGATGCAGCGACGCCGCGTGAAGGAAGAAGTATCTCGGTATGTAAACTTCTATCAGCAGGGAAGAAAATGACGGTACCTGACTAAGAAGCCCCGGCTAACTACGTGCCAGCAGCCGCGGTAATACGTAGGGGGCAAGCGTTATCCGGATTTACTGGGTGTAAAGGGAGCGTAGACGGAAGGGCAAGTCTGGAGTGAAAGCCCGGGGCTTAACTCCGGGACTGCTTTTGAAACTGCCAGGCTGGAGTGCAGGAGAGGTAAGCGGAATTCCTAGTGTAGCGGTGAAATGCGTAGATATTAGGAGGAACATCAGTGGCGAAGGCGGCTTACTGGACTGAAACTGACACTGAGGCAC…	>denovo82019	Bacteria;Firmicutes;Clostridia;Clostridiales;Lachnospiraceae	0.14523		0.00668107				0.0184632	0.0308642	0.14523							0.0137114	0.00731475		0.0229595	0.00821862			0.0379853	0.0395895	0.0118888		0.005251	0.0227373	0.00894637		0.0424628	0.0100612	0.00963329										0.00697849	0.0120592	0.00792487		0.00469903
CCTACGGGGGGCAGCAGTGGGGAATATTGCACAATGGGGGAAACCCTGATGCAGCGACGCCGCGTGACTGAAGAAGTATTTCGGTATGTAAAGGTCTATCAGCAAGGAAGAAGAGAGACGGTACTTGACTAAGAAGCCCCGGCTAACTACGTGCCAGCAGCCGCGGTAATACGTAGGGGGCAAGCGTTATCCGGATTTACTGGGTGTAAAGGGAGCGTAGGTGGTAAGGCAAGCCAGAAGTGAAAGCCCGGGGCTCAACCCCGAGGATTGCTTTTGGAACTGTCGAACTAGAGTGCAGGAGGGGCAAGCGGAATTCCTAGTGTAGCGGTGAAATGCGTAGATATTAGGAGGAACACCAGTGGCGAAGGCGGCTTGCTGGACTGTAACTGACACTGAGGC…	>denovo136647	Bacteria;Firmicutes;Clostridia;Clostridiales;Lachnospiraceae	0.144827										0.00208655	0.00284515																							0.00225774	0.00917936				0.00419217
CCTATGGGAGGCAGCAGTGAGGGATATTGGTCAATGGGGGAAACCCTGAACCAGCAACGCCGCGTGAGGGATGACGGTCTTCGGATTGTAAACCTCTGTCCTCTGTGAAGATAATGACGGTAGCAGAGGAGGAAGCTCCGGCTAACTACGTGCCAGCAGCCGCGGTAATACGTAGGGGGCAAGCGTTGTCCGGATTTACTGGGTGTAAAGGGTGCGTAGACGGCTCGGCAAGTCAGAGGTGAAATCCCTGGGCTTAACCGATGAACTGCCTTGGAAACTGTCGAACTTGAGTGAAGTAGAGGTAGGCGGAATTCCCGGTGTAGCGGTGAAATGCGTAGATATCGGGAGGAACACCAGTGGCGAAGGCGGCCTACTGGGCTTTAACTGACGCTGAGGCAC…	>denovo46415	Bacteria;Firmicutes;Clostridia;Clostridiales;Ruminococcaceae;Clostridium IV	0.144827				0.0100588								0.00145438							0.00410931												0.00201223			0.00338662	0.00229484				0.00209608
CCTACGGGTGGCAGCAGTGGGGAATATTGCACAATGGGGGAAACCCTGATGCAGCGACGCCGCGTGAGTGAAGAAGGATTTCGGTATGTAAAGCTCTATCAGCAGGGAAGAAGAAAGATGGTACCTGACTAAGAAGCCCCGGCTAACTACGTGCCAGCAGACGCGGGAATACGTAGGGGGCAAGCGTGATCCGGATTTACTGGGTGTAAAGGGAGCGTAGACGGCGAAGCAAGTCTGAAGTGAAAGCCCGGGGCTCAACCGCGGGACTGCTTTGGAAACTGTTTATCTAGAGTGCTGGAGAGGTAAGTGGAATTCCTAGTGTAGCGGTGAAATGCGTAGATATTAGGAGGAACACCAGTGGCGAAGGCGGCTTACTGGACAGTAACTGACGTTGAGGCT…	>denovo79307	Bacteria;Firmicutes;Clostridia;Clostridiales;Lachnospiraceae	0.144509										0.0104328		0.00436313		0.02405	0.0164537	0.0146295											0.0071054	0.00383416						0.0079021	0.00458968
CCTACGGGGGGCAGCAGTGGGGAATATTGGGCAATGGGCGCAAGCCTGACCCAGCAACGCCGCGTGAAGGAAGAAGGCCCTCGGGTTGTAAACTTCTTTTGTCAGGGACGAAGCAAGTGACGGTACCTGACGAATAAGCCACGGCTAACTACGTGCCAGCAGCCGCGGTAATACGTAGGTGGCAAGCGTTATCCGGATTTACTGGGTGTAAAGGGAGCGTAGACGGATAGGCAAGTCTGGAGTGAAAGCCCGGGGCTCAACCCCGGGACTGCTTTGGAAACTGTTTATCTAGAGTGCTGGAGAGGTAAGTGGAATTCCTAGTGTAGCGGTGAAATGCGTAGATATTAGGAGGAACACCAGTGGCGAAGGCGGTCTGCTGGACAGCAACTGACGCTGAGG…	>denovo22207	Bacteria;Firmicutes;Clostridia;Clostridiales;Ruminococcaceae	0.1443			0.00556158	0.00502942		0.0215404		0.00907688				0.00145438		0.1443	0.0246805	0.0548607			0.00821862	0.00334997		0.00759705	0.0213174	0.0014861		0.031506	0.0284216	0.0332294		0.0169851	0.00804894	0.032111		0.00338662	0.00688452			0.00506423		0.00242657		0.00348924	0.00241185			0.00469903
CCTACGGGTGGCAGCAGTGGGGGATATTGCACAATGGGCGCAAGCCTGATGCAGCGACGCCGCGTGAGGGAAGACGGTCTTCGGATTGTAAACCTCTGTCTTCGGGGACGATAATGACGGTACCCGAGGAGGAAGCCACGGCTAACTACGTGCCAGCAGCCGCGGTAATACGTAGGTGGCGAGCGTTGTCCGGAATTACTGGGTGTAAAGGGAGCGTAGACGGAGCAGCAAGTCTGGAGTGAAAACCCGGGGCTCAACCCCGGGACTGCTTTGGAAACTGTTGTTCTAGAGTGCTGGAGAGGTAAGTGGAATTCCTAGTGTAGCGGTGAAATGCGTAGATATTAGGAGGAACACCAGTGGCGAAGGCGGCTTACTGGACAGTAACTGACGTTGAGGCTC…	>denovo85763	Bacteria;Firmicutes;Clostridia;Clostridiales;Lachnospiraceae	0.144071														0.00481									0.00609069				0.0213162					0.0032111												0.00396244		0.0187961
CCTACGGGTGGCAGCAGTGGGGAATATTGGGCAATGGGCGCAAGCCTGACCCAGCAACGCCGCGTGAAGGAAGAAGGCCCTCGGGTTGTAAACTTCTTTTGTCAGGGACGAAGCAAGTGACGGTACCTGACGAATAAGCCACGGCTAACTACGTGCCAGCAGCCGCGGTAATACGTAGGTGGCAAGCGTTATCCGGATTTACTGGGTGTAAAGGGCGTGTAGGCGGGATTGCAAGTCAGATGTGAAAACTGGGGGCTCAACCTCCAGCCTGCATTTGAAACTGTAGTTCTTGAGTGCTGGAGAGGCAATCGGAATTCCGTGTGTAGCGGTGAAATGCGTAGATATTAGGAGGAACACCAGTGGCGAAGGCGGCTTACTGGACGGTAACTGACGTTGAGG…	>denovo20569	Bacteria;Firmicutes;Clostridia;Clostridiales;Ruminococcaceae;Flavonifractor	0.143509			0.00556158	0.00502942		0.0123088	0.00771605	0.00907688		0.0125193	0.00426773	0.0130894		0.0673401	0.0521033	0.0438885		0.00573987	0.00410931	0.00669994		0.0151941	0.0517709	0.0193194		0.05251	0.035527	0.0166147		0.00566171	0.0160979	0.0192666		0.0112887	0.00458968	0.00394594		0.00506423	0.00209608	0.00485313		0.00348924	0.00723554	0.00792487		0.0187961
CCTACGGGTGGCTGCAGTGGGGGATATTGCACAATGGGGGAAACCCTGATGCAGCGACGCCGCGTGAGTGAAGAAGTATTTCGGTATGTAAAGCTCTATCAGCAGGGAAGAGAATGACGGTACCTGAGTAAGAAGCCCCGGCTAACTACGTGCCAGCAGCCGCGGTAATACGTAGGGGGCAAGCGTTATCCGGATTTACTGGGTGTAAAGGGAGCGTAGACGGAAGGGCAAGTCTGGAGTGAAAGCCCGGGGCTCAACCCCGGGACTGCTTTGGAACCTGTCCGTCTTGAGTGCTGGAGAGGTAAGCGGAATTCCTAGTGTAGCGGTGAAATGCGTAGACATTAGGAGGAACACCAGTGGCGAAGGCGGCTTACTGGACGGTAACTGACGCTGAGGCGC…	>denovo92572	Bacteria;Firmicutes;Clostridia;Clostridiales;Lachnospiraceae	0.143509		0.0111351	0.00278079			0.0276949	0.0231481			0.0041731	0.0142258	0.0174525		0.03848	0.0219382	0.0256016		0.0114797		0.00669994		0.0455823	0.0700429	0.0104027		0.026255	0.0127897	0.00766832		0.00283086	0.0060367	0.0160555		0.00451549	0.0642556	0.0256486		0.0185688	0.00419217	0.00242657			0.00723554	0.0158497		0.00939805
CCTACGGGGGGCAGCAGTGGGGGATATTGCACAATGGAGGAAACTCTGATGCAGCGACGCCGCGTGAGGGAAGACGGTCTTCGGATTGTAAACCTCTGTCTTTAGGGACGAAAAAATGACGGTACCTAAGGAGGAAGCCACGGCTAACTACGTGCCAGCAGCCGCGGTAATACGTAGGTGGCAAGCGTTGTCCGGAATTACTGGGTGTAAAGGGAGCGCAGGCGGGAGAGCAAGTCAGCTGTGAAAACCACGGGCTTAACCTGTGGACTGCAGTTGAAACTGTTCTTCTTGAGTGAAGTAGAGGTAAGCGGAATTCCGAGTGTAGCGGTGAAATGCGTAGAGATTCGGAGGAACACCAGTGGCGAAGGCGGCTTACTGGGCTTTAACTGACGCTGAGGC…	>denovo74256	Bacteria;Firmicutes;Clostridia;Clostridiales;Ruminococcaceae	0.143414		0.0200432	0.00834237	0.0301765																							0.0127897	0.0204489		0.00283086
CCTACGGGTGGCTGCAGTGGGGAATATTGCACAATGGGGGATACCCTGATGCGGCGACGCCGCGTGAGCGAAGAAGTATTTCGGTATGTAAAGCTCTATCAGCAGGGAAGAAAGTGACGGTACCTGACTAAGAAGCACCGGCTAAATACGTGCCAGCAGCCGCGGTAATACGTATGGTGCAAGCGTTATCCGGATTTACTGGGTGTAAAGGGAGCGTAGACGGCAAGGCAAGTCTGAAGTGAAAGCCCGGGGCTTAACCGCGGGACTGCTTTGGAAACTGTCTGGCTGGAGTGCCGGAGAGGTAAGCGGAATTCCTAGTGTAGCGGTGAAATGCGTAGATATTAGGAGGAACACCAGTTGCGAAGGCTGCTTACTGGACGGTAACTGACGTTGACGCTC…	>denovo29063	Bacteria;Firmicutes;Clostridia;Clostridiales;Lachnospiraceae	0.14339		0.00668107	0.00278079			0.0123088	0.00771605	0.00907688		0.00208655	0.0113806	0.0159981		0.00481	0.0329074	0.0329164							0.0213174			0.005251	0.00142108	0.00639027		0.00283086		0.0160555		0.00677323	0.0114742	0.00789188		0.00506423	0.00209608	0.00121328		0.00348924				0.00939805
CCTACGGGCGGCAGCAGTGGGGAATATTGCACAATGGGGGAAACCCTGATGCAGCGACGCCGCGTGAGCGAAGAAGTATTTCGGTATGTAGAGCTCTATCAGCAGGGAAGAAAATGACGGTACCTGACTAAGAAGCACCGGCTAAATACGTGCCAGCAGCCGCGGTAATACGTATGGTGCAAGCGTTATCCGGTTTTACTGGGTGTAAAGGGAGCGTAGACGGATGGGCAAGTCTGAAGTGAAAGCCCGGGGCCCAACCCCGGGACTGCTTTGGAAACGGTGCATCTGGAGGGCTGGAGAGGTAAGTGGAATTCCTAGTGTAGCGGTGAAATGCGTAGATATTAGGAGGAACACCAGTGGCGAAGGCGGCTTACTGGACAGTAACTGACGTTGAGGCTC…	>denovo43133	Bacteria;Firmicutes;Clostridia;Clostridiales;Lachnospiraceae;Ruminococcus2	0.14339				0.00502942						0.0354714	0.00569031	0.00436313			0.0109691	0.0182869							0.00609069	0.0014861						0.00566171												0.0122124
CCTACGGGTGGCAGCAGTGGGGGATATTGCACAATGGGGGAAACCCTGATGCAGCAACGCCGCGTGAAGGATGAAGGTTTTCGGATTGTAAACTTCTGTTCTTAGTGACGATAATGACGGTAGCTAAGAAGAAAGCTCCGGCTAACTACGTGCCAGCAGCCGCGGTAATACGTAGGGAGCGAGCGTTGTCCGGATTTACTGGGTGTAAAGGGTGCGTAGGCGGCAGAGCAAGTCAGGCGTGAAAGCCATGGGCTTAACCCATGAACTGCGCTTGAAACTGTTCTGCTTGAGTGAAGTAGAGGCAGGCGGAATTCCCGGTGTAGCGGTGAAATGCGTAGATATTAGGAGGAACACCAGTGGCGAAGGCGGCTTACTGGACGGTAACTGACGTTGAGGCTC…	>denovo5566	Bacteria;Firmicutes;Clostridia;Clostridiales;Ruminococcaceae;Clostridium IV	0.143381		0.0378594	0.013904			0.00615441	0.00771605	0.00907688		0.0083462	0.00853546	0.0130894		0.01924	0.0164537			0.0344392	0.0123279	0.00669994		0.0151941	0.0182721	0.00594442		0.05251	0.0326848	0.0434538		0.0311394	0.0321958	0.0706441			0.00458968	0.0118378			0.00209608	0.00121328		0.0575725	0.0192948	0.063399		0.0281942
CCTACGGGTGGCTGCAGTGGGGAATATTGCACAATGGGGGAAACCCTGATGCAGCGACGCCGCGTGAAGGAAGAAGTATTTCGGTATGTAAACTTCTATCAGCAGGGAAGAAACTGACGGTACCTGACTAAGAAGCACCGGCTAAATACGTGCCAGCAGCCGCGGTAATACGTATGGTGCAAGCGTTATCCGGATTTACTGGGTGTAAAGGGAGCGTAGACGGGACAGCAAGTCTGATGTGAAAGGCGGGGGCTCAACCCCCGGACTGCATTGGAAACTGCTGGCCTGGAGTACCGGAGGGGTAAGCGGAATTCCTAGTGTAGCGGTGAAATGCGTAGATATTAGGAGGAACACTGGTGGCGAAGGCGGCTTACTGGACGGTAACTGACGTTGAGGCTC…	>denovo63393	Bacteria;Firmicutes;Clostridia;Clostridiales;Lachnospiraceae;Ruminococcus2	0.143375											0.00142258																												0.00209608
CCTACGGGTGGCTGCAGTGGGGAATATTGCACAATGGGGGAAACCCTGGTGCAGCGACGCCGCGTGAGCGAAGAAGTATCTCGGTATGTAAAGCTCTATCAGCAGGGAAGAAGATGACGGTACCTGACTAAGAAGCACCGGCTAAATACGTGCCAGCAGCCGCGGTAATACGTATGGTGCAAGCGTTATCCGGATTTACTGGGTGTAAAGGGAGCGTAGACGGTGAAGCAAGTCTGGAGTGAAAACCCGGGGCTTAACCCCGGGATTGCTTTGGAAACTGTTTAACTGGAGTGCAGGAGAGGTAAGCGGAATTCCTAGTGTAGCGGTGAAATGCGTAGATATTAGGAGGAACACCAGTGGCGAAGGCGGCTTACTGGACTGTAACTGACACTGAGGCTC…	>denovo104778	Bacteria;Firmicutes;Clostridia;Clostridiales;Lachnospiraceae	0.143059		0.124713	0.10567	0.0402354		0.00615441	0.00771605	0.00907688		0.0083462	0.0682837	0.00290875			0.00548456	0.0182869		0.0086098	0.0287652	0.00669994			0.00609069	0.0014861		0.026255	0.0113686	0.0306733			0.00201223			0.00225774	0.00688452	0.00591891		0.0135046	0.0230569	0.00485313		0.143059	0.0361777	0.0832112		0.0469903
CCTACGGGCGGCTGCAGTAGGGAATCTTCCACAATGGACGCAAGTCTGATGGAGCAACGCCGCGTGAGTGAAGAAGTATTTCGGTATGTAAAGCTCTATCAGCAGGGAAGAAAATGACGGTACCTGACTAAGAAGCCCCGGCTAACTACGTGCCAGCAGCCGCGGTAATACGTAGGGGGCAAGCGTTATCCGGATTTACTGGGTGTAAAGGGAGCGTAGACGGCAAGGCAAGTCTGAAGTGAAAGCCCGGGGCTTAACCGCGGGACTGCTTTGGAAACTGTCTGGCTGGAGTGCCGGAGAGGTAAGCGGAATTCCTAGTGTAGCGGTGAAATGCGTAGATATTAGGAGGAACACCAGTGGCGAAGGCGGCTTACTGGACGGTAACTGACGTTGAGGCTC…	>denovo7031	Bacteria;Firmicutes;Clostridia;Clostridiales;Lachnospiraceae	0.142508		0.00222702													0.0274228	0.00365738				0.00334997								0.00511221		0.00283086	0.0060367	0.0160555														0.00469903
CCTACGGGTGGCAGCAGTGGGGAATATTGCACAATGGGGGAAACCCTGATGCAGCGACGCCGCGTGAGCGAAGAAGTATTTCGGTATGTAAAGCTCTATCAGCAGGGAAGAAAATGACGGTACCTGACTAAGAAGCACCGGCTAAATACGTGCCAGCAGCCGCGGTAATACGTATGGTGCAAGCGTTATCCGGATTTACTGGGTGTAAAGGGAGCGTAGACGGATGTGCAGGTCTGGAGTGAAAACCCGGGGCTCAACCCCGGGACTGCTTTGGAAACTGTATATCTTGAGTGCTGGGGAGGTAAGTGGAATTCCTAGTGTAGCGGTGAAATGCGTAGATATTAGGAGGAACACCAGTGCCGAAGGCGGCTTACTGGACAGTAACTGACGTTGAGGCTC…	>denovo132336	Bacteria;Firmicutes;Clostridia;Clostridiales;Lachnospiraceae;Ruminococcus2	0.142175											0.00426773	0.00436313				0.00365738										0.005251	0.0540011	0.023005							0.00229484					0.00121328			0.00241185
CCTACGGGGGGCTGCAGTGAGGAATATTGGTCAATGGCCGGAAGGCTGAACCAGCCAAGTAGCGTGAAGGACGACGGCCCTACGGGTTGTAAACTTCTTTTGTCAGGGACGAAGCAAGTGACGGTACCTGACGAATAAGCCACGGCTAACTACGTGCCAGCAGCCGCGGTAATACGTAGGTGGCAAGCGTTATCCGGATTTACTGGGTGTAAAGGGCGTGTAGGCGGGATTGCAAGTCAGATGTGAAAACCACGGGCTCAACCTGTGGCCTGCATTTGAAACTGCAGTTCTTGAGTACTGGAGAGGCAGACGGAATTCCTAGTGTAGCGGTGAAATGCGTAGATATTAGGAGGAACACCAGTGGCGAAGGCGGTCTGCTGGACAGCAACTGACGCTGAG…	>denovo64679	Bacteria;Firmicutes;Clostridia;Clostridiales;Ruminococcaceae	0.142159																																		0.0587013	0.0229484	0.0256486		0.0776515	0.0293452	0.0873564
CCTACGGGGGGCAGCAGTAGGGAATATTGCACAATGGGGGAAACCCTGATGCAGCGACGCCGCGTGAGCGAAGAAGTATCTCGGTATGTAAAGCTCTATCAGCAGGGAAGAAGATGACGGTACCTGACTAAGAGGCACCGGCTAAATACGTGCCAGCAGCCGAGGTAATACGTATGGTTCAAGCGTTATCCGGATTTACTGGGTGTAAAGGGAGCGTAGACGGAAGAGCAAGTCTGTAGTGAAAGCACGGGGCTCAACCCCGGGACTGCTTTGGAAACTGTTTATCTAGAGTGCCGTAGAGGCAAGCGGAATTCCTAGGGTAGCGGTGAAATGCGTAGATATTAGGAGGAACACCAGTGGCGAAGGCGGCTTGCTGGACGGTAACTGACGTTGAGGCTC…	>denovo23047	Bacteria;Firmicutes;Clostridia;Clostridiales;Lachnospiraceae	0.142039																																										0.00174462
CCTACGGGTGGCAGCAGTAGGGAATATTGCACAATGGGGGAAACCCTGGTGCAGCGACGCCGCGTGAGCGAAGAAGTATCTCGGTATGTAAAGCTCTATCAGCAGGGAAGAAGATGACGGTACCTGACTAAGAAGCACCGGCTAAATACGTGCCAGCAGCCGCGGTAATACGTATGGTGCTAGCGTTATCCGGATTTACTGGGTGTAAAGGGAGCGTAGACGGAAGAGCAAGTCTGGAGTTAAAACCCGGGGCTTACCCCCGGGATTGCTTTGGAAACTGTTTAACTGGAGTGAAAACCCGGGGCTTAACCCCGTGATTGCTTTGGAAACTGTTTAACTGGAGTGCAGGAGAGGTAAGTGGAATTCCTAGTGTAGCGGTGAAATGCGTAGATATTAGGA…	>denovo56049	Bacteria;Firmicutes;Clostridia;Clostridiales;Lachnospiraceae	0.142039		0.00445405						0.00907688			0.0142258								0.00410931	0.00334997																							0.00241185
CCTACGGGAGGCTGCAGTGGGGAATAATGCACAATGGGGGAAACCCTGATGCAGCGACGCCGCGTGAGTGAAGAAGTATTTCGGTATGTAAAGCTCTATCAGCAGGGAAGAAAATGACGGTACCTGACTAAGAAGCCCCGGCTAACTACGTGCCAGCAGCCGCGGTAATACGTAGGGGGCAAGCGTTATCCGGATTTACTGGGTGTAAAGGGAGCGTAGCCGGTAATGCAAGCCTGGAGTGAAAACCCGGGGCTCAACCCCGGGACTGCTTTGGAAACTGTATAACGTGAGTGCCGGAGAGGTAAGCGGAATTCCTAGGGTAGCGGTGAAATGCGTAGATATTAGGAGGAACACCAGTGGCGAAGGCGGCTTACTGGACGGTAACTGACGTTGAGGCTC…	>denovo19379	Bacteria;Firmicutes;Clostridia;Clostridiales;Lachnospiraceae	0.141844							0.00771605			0.00208655		0.00145438												0.00297221																			0.00241185	0.00396244
CCTACGGGTGGCTGCAGTGAGGAATATTGGTCAATGGCCGAGAGGCTGAACCAGCCAAGTCGCGTGAAGGATGAAGGATCTATGGTTTGTAAACTTCTTTTATAGGGGAATAAAGTGTGGGACGTGTTCCATTTTGTATGTACCCTATGAATAAGCATCGGCTAACTCCGTGCCAGCAGCCGCGGTAATACGGAGGATGCGAGCGTTATCCGGATTTATTGGGTTTAAAGGGTGCGTAGGTGGTAATTTAAGTCAGCGGGGAAAGTTTGTGGCTCAACCATAAAATTGCCGTTGAAACTGGGTTACTTGAGTGTGTTTGAGGTAGGCGGAAGGCGTGGTGTAGCGGTGAAATGCATAGATATCACGCAGAACTCCAATTGCGAAGGCAGCCTGCCGGGC…	>denovo15557	Bacteria;Bacteroidetes;Bacteroidia;Bacteroidales;Porphyromonadaceae;Parabacteroides	0.141597						0.00307721
CCTACGGGTGGCAGCAGTGGGGAATATTGCACAATGGGGGAAACCCTGATGCAGCGACGCCGCGTGAAGGAAGAAGTATCTCGGTATGTAAACTTCTATCAGCAGGGAAGAAAATGACGGTACCTGACTAAGAAGCCCCGGCTAACTACGTGCCAGCAGCCGCGGTAATACGTAGGGGGCAAGCGTTATCCGGATTTACTGGGTGTAAAGGGCGCGTAGACGGAAGAGCAAGTCTGATGTGAAATGCTGGGGCTTAACCCCAGGACTGCATTGGAAACTGTTTTTCTAGAGTGCCGGAGAGGTAAGCGGAATTCCTAGTGTAGAGGTGAAATGCGTAGATATTAGGAGGAACACCAGTGGCGAAGGCGGCTTACTGGACGGTAACTGACGTTGAGGCTC…	>denovo12910	Bacteria;Firmicutes;Clostridia;Clostridiales;Lachnospiraceae;Blautia	0.141343																																0.0032111
CCTACGGGTGGCTGCAGTGGGGAATATTGCACAATGGGGGAAACCCTGATGCAGCAACGCCGCGTGAGCGAAGAAGGCCTTCGGGTCGTAAAGCTCTGTCCTCAAGGAAGATAATGACGGTACTTGAGGAGGAAGCCCCGGCTAACTACGTGCCAGCAGCCGCGGTAATACGTAGGGAGCAAGCGTTATCCGGATTTACTGGGCGTAAAGGGTGCGTAGGCGGTCTTACAAGTCAGGAGTGAAAGGCTAAGGCTCAACCGTAGTAAGCTCTTGAAACTGTTAGACTTGAGTGCAGGAGAGGAGAGTGGAATTCCTAGTGTAGCGGTGAAATGCGTAGATATTAGGAGGAAAACCAGTTGCGAAGGCGGCTCTCTGGACTGTAACTGACGCTGAGGCACG…	>denovo98303	Bacteria;Firmicutes;Clostridia;Clostridiales;Peptostreptococcaceae;Clostridium XI	0.140699			0.00278079																0.0123279	0.140699																						0.0209355
CCTACGGGTGGCTGCAGTGGGGAATATTGCACAATGGGGGAAACCCTGATGCAGCGATGCCGCGTGAAGGAAGAAGTATCTCGGTATGTAAACTTCTATCAGCAGGGAAGAAACTGACGGTACCTGACTAAGAAGCACCGGCTAAATACGTGCCAGCAGCCGCGGTAATACGTATGGTGCAAGCGTTATCCGGATTTACTGGGTGTAAAGGGAGCGTAGACGGATAGGCAAGTCTGGAGTGAAAGCCCGGGGCTCAACCCCGGGACTGCTTTGGAAACTGTTTATCTAGAGGGCTGGAGAGGTAAGTGAAATTCCTAGGGTAGCGGTGAAATGCGTAGATATTAGGAGGAACACCAGTGACGAAGGCGGCTTACTGGACGGTAACTGACGTTGAGGCTC…	>denovo2012	Bacteria;Firmicutes;Clostridia;Clostridiales;Lachnospiraceae;Coprococcus	0.140224			0.00278079			0.00923162	0.00771605	0.00907688			0.00426773	0.00727188		0.00962001	0.00274228	0.00731475		0.00286993				0.00759705	0.0152267	0.0014861		0.005251	0.0142108	0.00894637		0.00849257	0.00402447	0.0064222		0.00112887	0.00229484	0.0138108		0.00168808				0.00174462	0.00723554	0.00396244
CCTACGGGGGGCAGCAGTGGGGAATATTGCACAATGGGGGAAACCCTGATGCAGCGACGCCGCGTGAGGGAAGAAGGTTTTCGGATTGTAAACCTCTGTCTTTGGTGACGATAATGACGGTAACCAAAGAGGAAGCTACGGCTAACTACGTGCCAGCAGCCGCGGTGATACGTAGGTGGCAAGCGTTGTCCGGAATTACTGGGTGTAAAGGGAGCGCAGGCGGGAGAGCAAGTCAGCTGTGAAAACCACGGGCTTAACCTGTGGACTGCAGTTGAAACTGTTCTTCTTGAGTGAAGTAGAGGTAAGCGGAATTCCGAGTGTAGCGGTGAAATGCGTAGAGATTCGGAGGAACACCAGTGGCGAAGGCGGCTTACTGGGCTTTAACTGACGCTGAGGCTC…	>denovo133939	Bacteria;Firmicutes;Clostridia;Clostridiales;Ruminococcaceae	0.139943		0.0133621	0.00556158	0.0150883		0.00307721	0.00771605								0.00274228				0.00410931								0.00852648	0.00383416				0.00963329
CCTACGGGCGGCAGCAGTGGGGAATATTGCACAATGGGGGAAACCCTGATGCAGCAACGCCGCGTGAAGGATGACGGTTTTCGGATTGTAAACTTCTGTTCTCGTTGACGAAGACAGTGACGGTAAACGAGGAGCAAGCCACGGCTAACTACGTGCCAGCAGCCGCGGTAATACGTAGGGAGCAAGCGTTGTCCGGATTTACTGGGTGTAAAGGGTGCGTAGGCGGTTTGGTAAGTCAGAAGTGAAATCCATGGGCTTAACCCATGAACTGCTTTTGAAACTATCGAACTTGAGTGAAGTAGAGGTAGGCGGAATTCCCGGTGTAGCGGTGAAATGCGTAGAGATCGGGAGGAACACCAGTGGCGAAGGCGGCCTACTGGGCTTTAACTGACGCTGAGG…	>denovo82622	Bacteria;Firmicutes;Clostridia;Clostridiales;Ruminococcaceae;Clostridium IV	0.139943		0.0111351	0.00556158	0.0201177																							0.0341059	0.0166147										0.00337615
CCTACGGGTGGCAGCAGTGGGGGATATTGCACAATGGGGGAAACCCTGATGCAGCAACGCCGCGTGAGGGAAGAAGGTTTTCGGATTGTAAACCTCTGTCCCCGGGGAAGATAATGACGGTACCCGGGGAGGAAGCTCCGGCTAACTACGTGCCAGCAGCCGCGGTAATACGTAGGGAGCGAGCGTTGTCCGGAATTACTGGGTGTAAAGGGTGCGTAGGCGGCTGTGCAAGTCAGGCGTGAAATGCAGGGGCTTAACCCCTGAGCTGCGTTTGAAACTGCACGGCTTGAGTGAAGTAGAGGTAGGCGGAATTCCCGGTGTAGCGGTGAAATGCGTAGATATTAGGAGGAACACCAGTGGCGAAGGCGGCTTACTGGACAGTAACTGACGTTGAGGCTC…	>denovo120270	Bacteria;Firmicutes;Clostridia;Clostridiales;Ruminococcaceae	0.139844		0.00222702		0.00502942														0.00286993		0.00334997			0.0152267			0.010502	0.00284216	0.00127805														0.0122124	0.00241185			0.00469903
CCTACGGGAGGCTGCAGTGGGGAATATTGCACAATGGGGGAAACCCTGATGCAGCGACGCCGCGTGAGTGAAGAAGTATTTCGGTATGTAAAGCTCTATCAGCAGGGCAGAAGATGACGGTACCTGACTAAGAGGCACCGGCTAAATATGTGCCAGCAGCCGCGGTAATACGTATGGTGCAAGCGTTATCCGGATTTACTGGGTGTAAAGGGAGCGTAGACGGAAGAGCAAGTCTGGAGTGAAAGCCCGGGGCTCAACCCCGGGACTGCTTTGGAAACTGTTTATCTAGAGTGCCGGAGAGGCAAGCGGAATTCCTAGTGTAGCGGTGAAATGCGTAGATATTAGGAGGAACACCAGTGGCGAGGGCGGCTTACTGGACAGTAACTGACGTTGAGGCTC…	>denovo90063	Bacteria;Firmicutes;Clostridia;Clostridiales;Lachnospiraceae;Ruminococcus2	0.139784			0.00834237			0.00307721																	0.00304535																			0.00174462
CCTACGGGGGGCAGCAGTGGGGAATATTGCACAATGGGGGAAACCCTGGTGCAGCGACGCCGCGTGAGTGAAGAAGTATTTCGGTATGTAAAGCTCTATCAGCAGGGAAGAAGAAAGACGGTACCTGACTAAGAAGCCCCGGCTAACTACGTGCCAGCAGCCGCGGTAATACGTAGGGGGCAAGCGTTATCCGGATTTACTGGGTGTAAAGGGAGCGTAGACGACGAAGCAAGTCTGAAGGGAAAGTCCGGGGCTCAACCGCGGGACTGCTTTGGAAACTGTTTTGCTAGAGTGCTGGAGAGGTAAGTGGAATTCCTAGTGTAGCGGTGAAATGCGTAGGTATTAGGAGGAACACCAGTGGCGAAGGCGGCTTAATGGACAGTAACTGACGTTGAGGCT…	>denovo81812	Bacteria;Firmicutes;Clostridia;Clostridiales;Lachnospiraceae	0.139659										0.0083462	0.00853546	0.0305419		0.03367	0.0603302	0.029259											0.018474	0.0127805						0.0248352	0.013769	0.00789188			0.00628825
CCTACGGGGGGCAGCAGTGGGGAATATTGGGCAATGGGCGCAAGCCTGACCCAGCAACGCCGCGTGAAGGAAGAAGGCCCTCGGGTTGTAAACTTCTTTTGTCAGGGACGAAGCAAGTGACGGTACCTGACGAATAAGCCACGGCTAACTACGTGCCAGCAGCCGCGGTAATACGTAGGTGGCAAGCGTTATCCGGATTTACTGGGTGTAAAGGGCGTGTAGGCGGAGCTGCAAGTCAGATGTGAAATCTCCGGGCTTAACCCGGAAACTGCATTTGAAACTGTAGCCCTTGAGTATCGGAGAGGCAAGCGGAATTCCTAGTGTAGCGGTGAAATGCGTAGATATTAGGAGGAACACCAGTGGCGAAGGCGGCTTGCTGGACGACAACTGACGCTGAGG…	>denovo131661	Bacteria;Firmicutes;Clostridia;Clostridiales;Ruminococcaceae	0.137965			0.00834237	0.0100588		0.0338493	0.0385802	0.0453844							0.00274228	0.0256016			0.0164372	0.00334997			0.0152267				0.00426324			0.0113234	0.0120734	0.0834885
CCTACGGGGGGCTGCAGTGGGGAATATTGCACAATGGGGGAAACCCTGATGCAGCGACGCCGCGTGAGCGAAGAAGTATTTCGGTATGTAGAGCCCTATCAGCAGGGAAGAAAGTGACGGTACCTGACTAAGAAGCACCGGCTAAATACGTGCCAGCAGCCGCGGTAATACGTATGGTGCAAGCGTTATCCGGATTTACTGGGTGTAAAGGGAACGTAGACGGATAGGCAAGTCTGGAGTGAAAACCCGGGGCTCAACCCCGGGACTGCTTTGGAAACTGTTGTTCTAGAGGGCTGGAGAGGGAAGGGGAATTCCTAGTGTAGCGGTGAAATGCGTAGATATTAGGAGGAACACCAGTGGCGAAGGCGGCTTACTGGACAGTAACTGACGTTGAGGCTC…	>denovo68204	Bacteria;Firmicutes;Clostridia;Clostridiales;Lachnospiraceae;Ruminococcus2	0.137964															0.00274228	0.00731475											0.00142108				0.0060367								0.00209608
CCTACGGGTGGCAGCAGTGGGGAATATTGCACAATGGGGGGAACCCTGATGCAGCGACGCCGCGTGAGTGAAGAAGTACTTCGGTATGTAAAGCTCTATCAGCAGGGAAGAAAATGACGGTACCTGACTAAGAAGCCCCGGCTAACTACGTGCCAGCAGCCGCGGTAATACGTAGGGGGCAAGCGTTATCCGGAATTACTGGGTGTAAAGGGTGCGTAGGTGGCAGGGCAAGTCAGAAGTGAAAGCCCGGGGCTTAACTCCGGGACTGCTTTGGAAACTGTTGTTCTAGAGTGCTGGAGAGGTAAGTGGAATTCCTAGTGTAGCGGTGAAATGCGTAGATATTAGGAGGAACACCAGTGGCGAAGGCGGCTTACTGGACAGTAACTGACGTTGAGGCTC…	>denovo65482	Bacteria;Firmicutes;Clostridia;Clostridiales;Lachnospiraceae	0.137824		0.0200432	0.00834237			0.00923162	0.0154321	0.0907688						0.00481	0.00274228	0.00731475		0.0229595	0.0205465	0.0100499		0.0531794	0.0487255	0.00445831		0.015753	0.0440535	0.0178927		0.13305	0.0100612	0.0192666										0.0314032	0.103709	0.0515117		0.0469903
CCTACGGGAGGCTGCAGTGGGGAATATTGCACAATGGGGGGAACCCTGATGCAGCGACGCCGCGTGAGTGAAGAAGTACTTCGGTATGTAAAGCTCTATCAGCAGGGAAGAAAATGACGGTACCTGACTAAGAAGCCCCGGCTAACTACGTGCCAGCAGCCGCGGTAATACGTAGGGGGCAAGCGTTATCCGGATTTACTGGGTGTAAAGGGAGCGTAGACGGTAATGCAAGTCTGGAGTGAAACCCCGGGGCTCAACCCCGGTACTGCTTGGGAAACTGTATAACTTGAGTGCCGGAGAGGTAAGCGGAATTCCTAGTGTAGCGGTGAAATGCGTAGATATTAGGAGGAACACCAGTGGCGAAGGCGGCTTACTGGACTGTAACTGACGTTGAGGCTC…	>denovo7992	Bacteria;Firmicutes;Clostridia;Clostridiales;Lachnospiraceae	0.137791		0.00222702	0.00556158				0.00771605											0.00286993		0.00334997			0.00304535											0.00112887
CCTACGGGGGGCAGCAGTGGGGAATCTTCCGCAATGGGCGAAAGCCTGACGGAGCAACGCCGCGTGAACGAAGAAGGTCTTAGGATCGTAAAGTTCTGTTGTTAGGGGCGAAGGGCAACATTTTGAATAAGGGTGTTGTTTGACGGTACTTAACGAGGAAGCCACGGCTAACTACGTGCCAGCAGCCGCGGTAATACGTAGGCGGCAAGCGTTGTCCGGAATTATTGGGCGTAAAGGGAGCGCAGGCGGGAAGTTAAGCGGACTTTAAAAGTGCGGGGCTCAACCCCGTGGGGGGGTCCGAACTGACTTGCTTGAGTGCAGGAGAGGGAAGCGGAATTCCGAGTGTAGCGGTGAAATGCGTAGATATTAGGAAGAACACCAGTGGCGAAGGCGACTCCC…	>denovo23330	Bacteria;Firmicutes;Negativicutes;Selenomonadales;Veillonellaceae;Megamonas	0.137709
CCTACGGGCGGCAGCAGTAGGGAATATTGCACAATGGGGGAAACCCTGATGCAGCGACGCCGCGTGAGCGAAGAAGTATCTCGGTATGTAAAGCTCTATCAGCAGGGAAGAAGATGACGGTACCTGACTAAGAAGCACCGGCTAAATACGTGCCAGCAGCCGCGGTAATACGTATGGTGCAAGCGTTATCCGGCTTTACTGGGTGTAAAGGGAGCGTCGACGGAAGAGCAAGTCTGGAGTGAAAGCCCGGGGCTCAACCCCGGGACTGCGTTGGAAACTGTTTATCTAGAGTGCCGGAGAGGCAGGCGGAATTCCTGGGGTAGCGGTGGAATGCGTAGATATTAGGAGGAACACCAGTGGCGAAGGCGGCTTGCTGGACGGTAACTGACGTTGAGGCTC…	>denovo40258	Bacteria;Firmicutes;Clostridia;Clostridiales;Lachnospiraceae	0.13753
CCTACGGGCGGCAGCAGTGGGGGATATTGCACAATGGGGGAAACCCTGATGCAGCGACGCCGCGTGAGTGAAGAAGTATTTCGGTATGTAAAGCTCTATCAGCAGGGAAGAGAATGACGGTACCTGAGTAGGAAGCCCCGGCTAACTACGTGCCAGCAGCCGCGGTAATACGTAGGGGGCAAGCGTTATCCGGATTTACTGGGTGTAAAGGGAGCGTAGACGGCAAAGCAAGTCTGAAGTGGAAGCCCGGGGCTCAACCCCGGGACTGCTTTGGAAACTGTTCTGCTAGAGGGCTGGAGAGGTAAGCGGAATTCCTAGTGTAGCGGTGAAATGCGTAGATATTAGGAGGAACACCAGTGGCGAAGGCGGCTTACTGTACAGTAACTGACGTTGAGGCTC…	>denovo24341	Bacteria;Firmicutes;Clostridia;Clostridiales;Lachnospiraceae	0.137125		0.0244972	0.00834237	0.0201177		0.0461581	0.0231481	0.00907688		0.0333848	0.00284515	0.02327		0.00962001	0.0109691	0.0146295		0.0086098		0.00334997		0.0455823	0.0334988	0.00445831		0.036757	0.035527	0.0127805			0.00201223	0.0417443		0.0146753	0.0183587	0.0197297		0.00337615		0.00606642			0.00964739	0.00396244		0.0140971
CCTACGGGTGGCTGCAGTGGGGAATATTGCACAATGGGGGAAACTCTGATGCAGCGACGCCGCGTGAAGGAAGAAGGTCTTCGGATTGTAAACTTCTGTTGTCAGGGACGATAATGACGGTACCTGACGAGAAAGCCACGGCTAACTACGTGCCAGCAGCCGCGGTAAAACGTAGGTGGCAAGCGTTGTCCGGAATTACTGGGTGTAAAGGGAGCGCAGGCGGATTGACAAGTTGGAGGTGAAATTCATGGGCTCAACCCATGACCTGCCTTCAAAACTGTCAATCTTGAGTGGTGTAGAGGTAGGCGGAATTCCCGGTGTAGCGGTGGAATGCGTAGATATCGGGAGGAACACCAGTGGCGAAGGCGGCCTACTGGGCACTAACTGACGCTGAGGCTC…	>denovo124902	Bacteria;Firmicutes;Clostridia;Clostridiales;Ruminococcaceae;Faecalibacterium	0.137104															0.00548456	0.00365738
CCTACGGGTGGCTGCAGTGGGGAATATTGCACAATGGGGGAAACCCTGATGCAGCGACGCCGCGTGAGCGAAGAAGTATTTCGGTATGTAAAGCTCTATCAGCGGGGAAGAAACTGACGGTACCTGACTAAGAAGCACCGGCTAAATACGTGCCAGCAGCCGCGGTAATACGTATGGTGCAAGCGTTATCCGGATTTACTGGGTGTAAAGGGAGCGTAGACGGATAGGCAAGTCTGGAGTGAAAGCCCGGGGCTCAACCCCGGGACTGCTTTGGAAACTGTTTGTCTAGAGTGCCGGAGAGGTAAGCGGAATTCCTAGTGTAGCGGTGAAATGCGTAGATATTAGGAGGAACACCAGTGGCGAAGGCGGCCTGCTGGGCTTAAACTGACGCTGAGGCTC…	>denovo88408	Bacteria;Firmicutes;Clostridia;Clostridiales;Lachnospiraceae;Ruminococcus2	0.137104		0.00445405		0.0100588		0.00307721		0.0181538		0.00625965	0.00142258	0.00872626		0.00481	0.00548456				0.00410931				0.0152267	0.0014861		0.026255	0.0241584	0.0281172		0.00566171	0.00201223	0.0064222		0.00451549	0.00688452	0.00986485		0.00337615	0.00209608	0.00121328		0.00523387	0.00723554	0.00396244		0.00469903
CCTACGGGTGGCTGCAGTGGGGAATATTGGGCAATGGGCGCAAGCCTGATCCAGCAACGCCGCGTGAAGGAAGAAGGCTTTCGGGTTGTAAACTTCTTTTGTCGGGGACGAAACAAATGACAGTACCCGACGAATAAGCCACGGCTAACTACGTGCCAGCAGCCGCGGTAATACGTATGGTGCAAGCGTTATCCGGATTTACTGGGTGTAAAGGGAGCGTAGACGGCGAAGCAAGTCTGAAGTGAAAACCCAGGGCTCAACCCTGGGACTGCTTTGGAAACTGTTTTGCTAGAGTGCTGGAGAGGTAAGTGGAATTCCTAGTGTAGCGGTGAAATGCGTAGATATTAGGAGGAACACCAGTGGCGAAGGCGGCTTACTGGACAGTAACTGACGTTGAGG…	>denovo10846	Bacteria;Firmicutes;Clostridia;Clostridiales	0.13672										0.00625965	0.0142258	0.0101806		0.00962001	0.00274228	0.00731475		0.00286993					0.00913604	0.0014861		0.010502	0.00426324	0.00511221				0.0032111			0.00458968	0.00394594		0.00337615	0.00209608	0.00242657			0.00241185
[truncated: 1,322 more rows]
[truncated: 296 more columns]
